# Supplementary material for: Caveolae couple mechanical stress to integrin recycling and activation
Source: eLife journal article supplement (doi:10.7554/elife.82348), 2022-10-20

Cav1KO

Cav1WT

Cav1KO

PTRF

Empty

Cav1

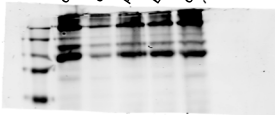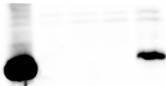

Supplement: fig1-data2 [file elife-82348-fig1-data2-v4.pdf]
