# Supplementary material for: Caveolae couple mechanical stress to integrin recycling and activation
Source: eLife journal article supplement (doi:10.7554/elife.82348), 2022-10-20

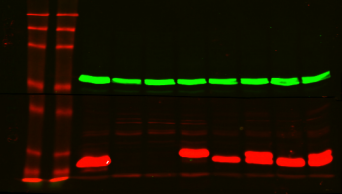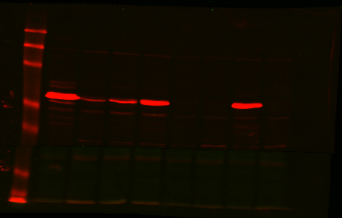

Supplement: fig1-data3 [file elife-82348-fig1-data3-v3.pdf]
