# Supplementary material for: Caveolae couple mechanical stress to integrin recycling and activation
Source: eLife journal article supplement (doi:10.7554/elife.82348), 2022-10-20
Supplement: fig1-data4 [file elife-82348-fig1-data4-v3.pdf]

Cav1WT      Cav1KO  
Empty      PTRF      Cav1

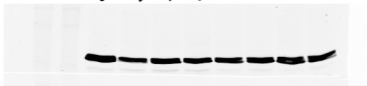

Mouse anti-alpha tubulin  
Abcam 1:10.000

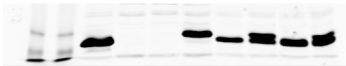

Rabbit anti Cav1  
(CS) 1:1000

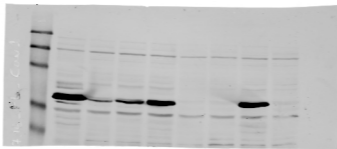

Rabbit anti PTRF  
Abcam 1:1000
