# Supplementary material for: Caveolae couple mechanical stress to integrin recycling and activation
Source: eLife journal article supplement (doi:10.7554/elife.82348), 2022-10-20
Supplement: fig3-figsupp1-data1 [file elife-82348-fig3-figsupp1-data1-v4.pdf]

100  
90  
80  
70  
60  
50  
40  
30  
20  
10  
0

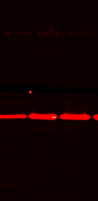

PERCENTAGE OF TOTAL PROTEIN IN CYTOSOL FRACTION

HOURS

0 2 4 6 8 10 12 14 16 18 20 22 24

100  
90  
80  
70  
60  
50  
40  
30  
20  
10  
0
