# Supplementary material for: Caveolae couple mechanical stress to integrin recycling and activation
Source: eLife journal article supplement (doi:10.7554/elife.82348), 2022-10-20
Supplement: fig3-figsupp1-data2 [file elife-82348-fig3-figsupp1-data2-v4.pdf]

Cav1KO

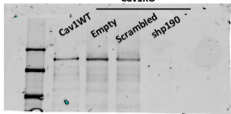

Mouse anti p190RhoGAP  
Upstate 1:1000

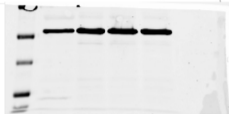

Mouse anti-alpha tubulin  
Abcam 1:10.000

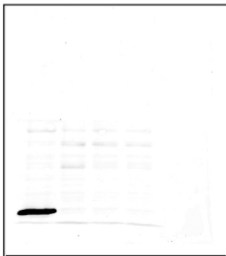

Rabbit anti cav1  
(CS) 1:1000
