# Supplementary material for: Caveolae couple mechanical stress to integrin recycling and activation
Source: eLife journal article supplement (doi:10.7554/elife.82348), 2022-10-20

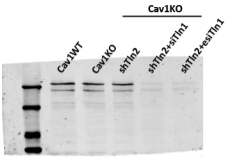

Mouse anti Talin  
Sigma Aldrich 1:200

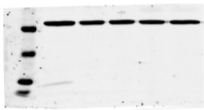

Mouse anti-alpha tubulin  
Abcam 1:10.000

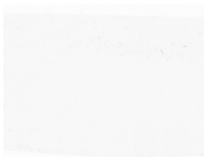

Rabbit anti Cav1  
(CS) 1:1000

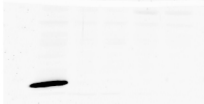

Supplement: fig7-figsupp2-data3 [file elife-82348-fig7-figsupp2-data3-v3.pdf]
