# Supplementary material for: Caveolae couple mechanical stress to integrin recycling and activation
Source: eLife. 2022 Oct 20;11:e82348. doi: 10.7554/eLife.82348 (PMC9747151; doi:10.7554/eLife.82348)
Supplement: Figure 2—source data 1. — They represent two examples of the data used to generate the reinforcement increment shown in Figure 2G. [file elife-82348-fig2-data1.xlsx]

## Sheet: Hoja1
		No reinforcement		Reinforcement
		-1.42109e-14		0
		0.00644397		0.0019444
		0.024463		-0.00133743
		0.00572967		0.0074189
		0.0129063		-0.00227742
		0.00650934		-0.000441436
		-0.000219118		-0.00674793
		0.00739858		0.00517032
		-0.0060582		0.00467618
		-0.00712384		0.00443852
		-0.00564433		0.00342266
		0.0218778		0.000733908
		-0.00172096		0.00332941
		-0.00306522		0.0049328
		0.0286035		0.0011929
		0.0221318		0.0120997
		-0.00348897		-0.0011196
		-0.0294471		-0.00198231
		-0.00521223		0.00612819
		-0.0213125		-0.0139296
		0.000986224		-0.00450143
		0.0128711		0.00326766
		0.00205311		-0.00968424
		0.0125612		-0.0020555
		0.00651924		0.00401586
		-0.00494483		-0.00558175
		-0.00517751		0.0118884
		0.0119893		0.00057959
		-0.00800666		-0.00981397
		-0.00365398		0.000969405
		-0.0237064		-0.00551455
		-0.00543634		0.00444975
		-0.00834211		-0.00264709
		-0.00358067		0.00394411
		-0.00809584		-0.0050099
		0.00828116		0.00921789
		-0.00411995		-0.00317893
		0.0141454		-0.00468458
		-0.00430179		0.00384567
		-0.0138082		0.002862
		0.0221939		-0.00852672
		0.00299141		0.00131141
		0.0245595		-0.00233808
		0.0075834		0.00111436
		-0.00209469		0.00234983
		-0.000979989		-0.00534214
		-0.0114415		-0.0052842
		-0.0101		0.000367879
		0.00423125		-0.000411361
		-0.0101849		0.00253121
		-0.00380109		0.0107544
		-0.000848101		0.00623308
		0.00412937		-0.00407964
		0.00282065		-0.00376637
		-0.004253		-0.00514471
		-0.00478844		0.00299412
		-0.0113447		-0.00905131
		0.0241448		0.00612387
		0.0131711		-0.0028102
		0.00493375		0.00415538
		0.00124483		-0.00969609
		-0.0117279		-0.00159906
		-0.00203472		-0.00396987
		0.00984686		0.00201572
		-0.0119982		-0.0033172
		-0.0158527		0.00439262
		-0.000211212		0.000661304
		0.0275032		0.0115489
		0.0101772		0.00927772
		0.00249104		-0.00172961
		-4.53881e-05		0.00646877
		-0.00144609		0.00386788
		-0.0235595		-0.000723245
		0.021671		0.00499649
		0.00849262		-0.00776165
		0.00973781		-0.00961826
		0.00276206		-0.00932868
		0.0102034		0.00354223
		0.0300522		0.0252078
		0.0368804		0.0376355
		0.0205192		0.044619
		0.0395112		0.0553509
		0.00592192		-0.0372629
		-0.0766245		-0.0631863
		-0.0260725		0.00891903
		0.0383296		0.0302151
		0.000675244		-0.0415141
		-0.0508742		-0.0579594
		-0.024288		0.0116066
		0.00643167		0.0362588
		-0.0219772		-0.0401767
		-0.0504425		-0.0521382
		-0.000872064		0.0193417
		0.0210169		0.0467206
		-0.018802		-0.0349863
		-0.0128299		-0.0542631
		0.0126042		0.0303033
		0.0300324		0.0736092
		-0.0030171		-0.0290655
		-0.0263498		-0.0661854
		-0.0150923		0.0031828
		0.0200085		0.0616634
		0.0274879		0.0611607
		-0.0303533		-0.068933
		-0.0356309		-0.021664
		0.040908		0.0662177
		0.0173487		0.0460127
		-0.0589617		-0.0742756
		-0.0268642		-0.0441919
		0.0253796		0.0555364
		0.0343408		0.0299572
		-0.0360399		-0.0685505
		-0.0192361		-0.0387358
		0.05378		0.0774117
		0.0322781		0.0211811
		-0.0229235		-0.06567
		-0.0304544		-0.0506221
		0.0476904		0.0808558
		0.0344689		0.0338551
		-0.0598536		-0.0641442
		-0.0206429		-0.0278985
		0.0615236		0.0747511
		0.0359502		0.0334328
		-0.0372368		-0.0834044
		-0.0342992		-0.0651647
		0.0487701		0.0697747
		0.0665568		0.0741422
		-0.0537594		-0.0782418
		-0.0784531		-0.0786219
		0.0352543		0.077095
		0.0517443		0.0526311
		-0.0646744		-0.0807449
		-0.0678581		-0.0773964
		0.0699362		0.0982028
		0.0782664		0.0646823
		-0.0420176		-0.0734339
		-0.0631298		-0.0653091
		0.0467873		0.0865641
		0.0747924		0.0951807
		-0.0546657		-0.0761201
		-0.0197872		0.0155794
		0.0580956		0.0686391
		0.0542727		0.0672981
		-0.0750416		-0.0955813
		-0.0743848		-0.104166
		0.0456557		0.0665234
		0.0434217		0.0632059
		-0.0422869		-0.0765476
		-0.0577792		-0.089051
		0.0463561		0.0672897
		0.0617083		0.0868181
		-0.0285368		-0.0648544
		-0.041917		-0.071424
		0.0456746		0.0864559
		-0.00896037		-0.0422208
		-0.0368603		-0.0568514
		-0.0801383		-0.0666936
		0.0883306		0.084356
		0.063652		0.0886401
		-0.0365351		-0.0630293
		-0.0627874		-0.075547
		0.054136		0.0767375
		0.0512697		0.0820891
		-0.0848596		-0.0757954
		-0.0765693		-0.0904914
		0.0706701		0.0841845
		0.0808769		0.0978161
		-0.0658483		-0.0728183
		-0.0747827		-0.0996356
		0.0652936		0.0653786
		0.0748936		0.0790408
		-0.0815319		-0.0829974
		-0.069271		-0.079217
		0.0649201		0.0678476
		0.0539915		0.0770287
		-0.0443374		-0.0835645
		-0.0751044		-0.0908664
		0.0422251		0.0791255
		0.0496753		0.0974444
		-0.0561092		-0.0816202
		-0.0388536		-0.0935477
		0.0543379		0.060454
		0.0715139		0.0974078
		-0.0306245		-0.0771316
		-0.0477145		-0.0867981
		0.0528345		0.0784974
		0.0446993		0.0944616
		-0.0381754		-0.0968124
		-0.0477443		-0.0947114
		0.0569203		0.0812748
		0.0416965		0.101649
		-0.0690338		-0.104218
		-0.0538913		-0.086382
		0.0731448		0.0643969
		0.0842469		0.0800376
		-0.0494041		-0.101685
		-0.0598738		-0.100483
		0.0332031		0.0739171
		0.0532239		0.104759
		-0.0757209		-0.0920156
		-0.0526706		-0.0950261
		0.0459586		0.120275
		0.0580938		0.123881
		-0.0309181		-0.0696147
		-0.0562386		-0.0936955
		0.0453042		0.0695023
		0.0209123		0.0939999
		-0.0416333		-0.0975754
		-0.0416532		-0.104873
		0.0601284		0.0955209
		0.0405443		0.0975324
		-0.0511393		-0.0849022
		-0.0571626		-0.0960484
		0.0404815		0.107669
		0.0625418		0.114006
		-0.0258628		-0.0660305
		-0.0343493		-0.0843551
		0.0377404		0.0798075
		0.0155922		0.0933879
		-0.0476086		-0.0854883
		-0.0231938		-0.0930637
		0.0198441		0.0583762
		0.0397518		0.0627308
		-0.0227016		-0.0977361
		-0.0363266		-0.1047
		0.0184443		0.0667051
		0.0407696		0.0823585
		0.012959		-0.0862714
		-0.0487288		-0.091011
		0.0219694		0.0909609
		0.0278499		0.109481
		-0.0240251		-0.0781086
		-0.0458389		-0.106686
		0.0307301		0.0917199
		0.00525273		0.0935871
		-0.0279529		-0.0841858
		-0.03239		-0.092479
		0.0466011		0.0931754
		0.0628443		0.10324
		-0.042721		-0.0942179
		-0.0562258		-0.106176
		0.0259005		0.0840521
		0.0148613		0.10429
		-0.0256707		-0.0839763
		-0.0427266		-0.0774669
		0.0444757		0.0938943
		0.0386796		0.0998804
		-0.0591197		-0.0813461
		-0.0313465		-0.0859858
		0.057213		0.10223
		0.0380375		0.0940734
		-0.0123629		-0.0741588
		-0.0587375		-0.0969098
		0.0598839		0.116209
		0.040271		0.114334
		-0.0498659		-0.0774813
		-0.0703209		-0.0954593
		0.0559569		0.103775
		0.0587251		0.103239
		-0.0631077		-0.0886114
		-0.0550121		-0.100458
		0.0675809		0.0894804
		0.0582637		0.0970145
		-0.0543949		-0.0887274
		-0.0588845		-0.0895332
		0.0250137		0.0857711
		0.0550404		0.0966477
		-0.0599051		-0.0931905
		-0.0647778		-0.104392
		0.0571134		0.0745262
		0.0599575		0.1057
		-0.0323691		-0.0753342
		-0.0420427		-0.0891178
		0.0564244		0.0899155
		0.0466286		0.107527
		-0.0247537		-0.0875964
		-0.0609296		-0.10554
		0.0404626		0.0944178
		0.0461148		0.112137
		-0.0346645		-0.0838545
		-0.0574627		-0.0992437
		0.0426068		0.0999346
		0.0510582		0.106622
		-0.056213		-0.0809669
		-0.0437822		-0.102039
		0.0491106		0.0684514
		0.0605904		0.0867661
		-0.0251606		-0.098462
		-0.0538553		-0.0929765
		0.0398715		0.0807663
		0.0347672		0.0870804
		-0.0334856		-0.091471
		-0.0300199		-0.0945539
		0.0174005		0.0780528
		0.0419081		0.0962147
		-0.0557676		-0.0884959
		-0.0414652		-0.0939607
		0.0295563		0.0756045
		0.0285137		0.100689
		-0.0321253		-0.103324
		-0.045242		-0.0946923
		0.0212122		0.0767428
		0.0341982		0.0996111
		-0.0220654		-0.0936115
		-0.0472593		-0.101109
		0.0352449		0.0791966
		0.0425223		0.0948811
		-0.0256169		-0.0774982
		-0.0293327		-0.0881572
		0.0105978		0.0732812
		0.0451746		0.102501
		-0.0129948		-0.075109
		-0.00231529		-0.0791807
		0.00262107		0.0588179
		0.0290778		0.0758447
		-0.0151305		-0.0713689
		-0.0421021		-0.0719327
		0.010647		0.0622278
		0.0285582		0.0864474
		-0.0324707		-0.0804533
		-0.0191361		-0.0740351
		0.0133423		0.057222
		0.0250712		0.0992967
		-0.00729132		-0.0659685
		-0.0265434		-0.0660243
		0.0360043		0.0671514
		0.0240553		0.084529
		-0.0379535		-0.0606959
		-0.0042918		-0.0760582
		0.0353764		0.0741922
		0.0583082		0.0895811
		-0.0337642		-0.0479456
		-0.0442952		-0.0672556
		0.0366777		0.0511725
		0.0501281		0.0561938
		-0.040873		-0.056038
		-0.0609397		-0.0635285
		0.03228		0.0578864
		0.0298329		0.0529854
		-0.0359548		-0.0614339
		-0.0487298		-0.057393
		0.0296714		0.0304782
		0.0617479		0.0597062
		-0.0548907		-0.0497108
		-0.0557199		-0.055716
		0.0340848		0.0370924
		0.0482597		0.0417383
		-0.0401929		-0.0368644
		-0.0302235		-0.0483436
		0.0412753		0.0463096
		0.0354949		0.0505479
		-0.0290151		-0.0525102
		-0.0512957		-0.0700842
		0.0364556		0.0457166
		0.0405209		0.0563284
		-0.0275787		-0.0496176
		-0.0583588		-0.0572307
		0.0440451		0.0447832
		0.0446299		0.0463055
		-0.0461687		-0.0512161
		-0.0644824		-0.0630757
		0.0512513		0.0287208
		0.0608511		0.0391012
		-0.037236		-0.0435271
		-0.04179		-0.055114
		0.0528028		0.0510083
		0.0324555		0.0566502
		-0.0252869		-0.0183675
		-0.0542451		-0.0463169
		0.0443091		0.0551668
		0.0447843		0.0556887
		-0.0343601		-0.0234658
		-0.0393715		-0.0457585
		0.0361927		0.0457667
		0.0640556		0.0556206
		-0.035235		-0.0258294
		-0.0586187		-0.0567581
		0.0210876		0.0367668
		0.0593008		0.0537965
		-0.0343335		-0.0357299
		-0.0417833		-0.0563128
		0.0473196		0.0405313
		0.0242225		0.0322467
		-0.00823828		-0.038314
		-0.0345622		-0.0725948
		0.0533925		0.050392
		0.0284605		0.0540647
		-0.0335037		-0.0505982
		-0.0766459		-0.0592859
		0.0496223		0.0440527
		0.0559662		0.047033
		0.00335255		-0.042603
		-0.0486467		-0.0628236
		0.0662818		0.0285008
		0.0281724		0.0286346
		-0.0708706		-0.0562345
		-0.0774179		-0.0615699
		0.0465236		0.0498076
		0.0649634		0.0606811
		-0.0336065		-0.0457084
		-0.0494726		-0.053705
		0.0573857		0.0431037
		0.0456499		0.0576331
		-0.0599913		-0.0349484
		-0.0868593		-0.0643879
		0.0442082		0.0248579
		0.0339901		0.0493954
		-0.00856644		-0.0507402
		-0.0533432		-0.0607565
		0.0313648		0.0430858
		0.0430666		0.0661546
		-0.0239968		-0.0452427
		-0.0556747		-0.0600607
		0.0626738		0.0582421
		0.0682447		0.0759435
		-0.0440758		-0.0344366
		-0.0518969		-0.0555894
		0.040755		0.0553724
		0.04531		0.0587624
		-0.014117		-0.067822
		-0.0464348		-0.0876025
		0.0439993		0.0426684
		0.0452239		0.0631954
		-0.0658661		-0.0597341
		-0.0926716		-0.0868958
		0.0463952		0.0528639
		0.0351051		0.0687247
		-0.0275054		-0.0520471
		-0.0404208		-0.0713036
		0.0492326		0.0498048
		0.0447015		0.0737552
		-0.0387937		-0.0341695
		-0.0323664		-0.0661016
		0.0358714		0.0522769
		0.0258841		0.0653565
		-0.0339315		-0.0561494
		-0.0451496		-0.0832446
		0.0297985		0.0447987
		0.0601711		0.0571879
		-0.0451113		-0.0832686
		-0.0386841		-0.107323
		0.0280918		0.0616402
		0.0466044		0.073752
		-0.0448061		-0.0476972
		-0.0478269		-0.0497895
		0.04442		0.0713107
		0.0483079		0.0798412
		-0.0337427		-0.036017
		-0.0378177		-0.0612401
		0.046125		0.0564586
		0.0230199		0.0804954
		-0.0335716		-0.0447464
		-0.0406889		-0.0671523
		0.0522407		0.0535806
		0.023185		0.061125
		-0.0189741		-0.0519094
		-0.0351565		-0.0787699
		0.0224947		0.0365753
		0.0546936		0.0659135
		-0.0423803		-0.0548386
		-0.0458238		-0.0671158
		0.0399554		0.0488836
		0.0558694		0.0800942
		-0.0768272		-0.0544691
		-0.0448246		-0.0563805
		0.0420084		0.0523501
		0.0695301		0.0728066
		-0.0574325		-0.0437377
		-0.0509008		-0.0635892
		0.0413797		0.0444195
		0.0782877		0.0680591
		-0.0308445		-0.0386679
		-0.0640531		-0.0499848
		0.0161201		0.0424947
		0.0718071		0.0702235
		-0.0459074		-0.0417799
		-0.0571596		-0.0377231
		0.0733732		0.061875
		0.0482618		0.0780209
		-0.0442048		-0.0488043
		-0.0103309		-0.0482369
		0.0492549		0.0420482
		0.0438402		0.0478921
		-0.0520077		-0.038475
		-0.0558423		-0.0457403
		0.0447144		0.04883
		0.0382578		0.0657585
		-0.0573252		-0.0432935
		-0.0452251		-0.0559344
		0.0387489		0.0304147
		0.0235242		0.0417304
		-0.0312196		-0.0441313
		-0.0367574		-0.0443796
		0.059918		0.0266842
		0.0536905		0.0531318
		-0.0397537		-0.0160419
		-0.0541416		-0.0352847
		0.0493992		0.0537507
		0.0596986		0.0562001
		-0.0688098		-0.0245515
		-0.0590374		-0.0289436
		0.0387469		0.0467106
		0.0495205		0.0463295
		-0.0272101		-0.0425044
		-0.0607683		-0.0695392
		0.0467537		0.0319885
		0.0756382		0.0490318
		-0.0508788		-0.0610204
		-0.0458619		-0.0659112
		0.0524064		0.0299474
		0.0299541		0.0397605
		-0.0535294		-0.0463919
		-0.0420942		-0.0458672
		0.0386177		0.0456948
		0.0583618		0.0663532
		-0.0597962		-0.0517912
		-0.0334823		-0.0575754
		0.0426224		0.0450815
		0.0638328		0.0723876
		-0.0246969		-0.046873
		-0.0686489		-0.0633386
		0.0299331		0.058461
		0.0302273		0.0629842
		-0.0297101		-0.054109
		-0.0266445		-0.0665066
		0.010481		0.0604194
		0.0296869		0.0832195
		-0.0231269		-0.0625097
		-0.0428819		-0.0800268
		0.0281585		0.0484977
		0.0475195		0.061538
		-0.00856958		-0.0431029
		-0.0468351		-0.0598074
		0.0558052		0.0592341
		0.0478285		0.0676166
		-0.0341044		-0.0339989
		-0.0674708		-0.0455653
		0.0417678		0.0569489
		0.0435421		0.064179
		-0.0587144		-0.0422736
		-0.0627255		-0.0640046
		0.0549086		0.0482948
		0.0560844		0.0492205
		-0.0706431		-0.0505534
		-0.0552625		-0.0722081
		0.0447742		0.047063
		0.0555619		0.066077
		-0.0544346		-0.044216
		-0.0634769		-0.0687814
		0.0524191		0.0458844
		0.0553949		0.0459996
		-0.0506121		-0.0276498
		-0.0771477		-0.0535161
		0.0872309		0.0421634
		0.0477494		0.053608
		-0.0611673		-0.0295623
		-0.0409424		-0.0529982
		0.0598844		0.0353148
		0.0617784		0.0420327
		-0.0519714		-0.0324916
		-0.071718		-0.0495024
		0.0624959		0.0430302
		0.0674044		0.04296
		-0.0478984		-0.0439464
		-0.0812248		-0.0612195
		0.052931		0.0328595
		0.0626292		0.0439923
		-0.0527481		-0.0501197
		-0.0606327		-0.0754485
		0.0593228		0.0338353
		0.0512088		0.045488
		-0.0403509		-0.027163
		-0.0587093		-0.0418619
		0.0365982		0.05661
		0.0566139		0.0575927
		-0.0502858		-0.0140097
		-0.0358767		-0.0300986
		0.0428549		0.0381065
		0.0537285		0.0468055
		-0.0305281		-0.0401773
		-0.0512792		-0.0674497
		0.00762868		0.0273401
		0.042377		0.0412734
		-0.0307254		-0.0417454
		-0.0324169		-0.0597539
		0.0475024		0.0428722
		0.0296562		0.0326371
		-0.0260907		-0.0396109
		-0.0428327		-0.0633028
		0.012962		0.0426983
		0.0130503		0.0452501
		-0.0350748		-0.0362054
		-0.0322079		-0.0498955
		0.0117071		0.0475196
		0.0359391		0.0496221
		-0.00384819		-0.0353312
		-0.0292562		-0.0609478
		0.0250426		0.0376576
		0.0377871		0.0546035
		-0.0197159		-0.0338613
		-0.0325064		-0.0615243
		0.0319906		0.057924
		0.0357084		0.0668749
		-0.0280204		-0.0438383
		-0.0372037		-0.0651069
		0.0365162		0.0411688
		0.0350602		0.0654011
		-0.0121202		-0.0462315
		-0.0486826		-0.0589575
		0.00830464		0.0491128
		0.0540292		0.0602654
		-0.0308258		-0.053171
		-0.0516125		-0.0663777
		0.0438137		0.0511215
		0.0299676		0.0599057
		-0.0150638		-0.0528319
		-0.0206418		-0.0590154
		0.0105011		0.0369038
		0.0177394		0.0533844
		-0.003483		-0.0405865
		-0.0452959		-0.0648348
		0.0175388		0.0472131
		0.0159951		0.0563546
		-0.0103558		-0.0565069
		-0.0379047		-0.067542
		0.0355106		0.0410178
		0.0325895		0.0601969
		-0.0194462		-0.0515328
		-0.0223608		-0.0583166
		0.0162557		0.0381096
		0.0294568		0.0703526
		-0.00406322		-0.0416382
		-0.0105419		-0.0597511
		0.0273658		0.0388883
		0.0221184		0.0641038
		-0.0125311		-0.0355146
		-0.0480063		-0.0566331
		0.0226929		0.0648785
		0.0526154		0.0679639
		-0.0170703		-0.0360783
		-0.0337604		-0.0549579
		0.00896518		0.0385005
		0.0354168		0.0592958
		-0.0345485		-0.0575745
		-0.0189253		-0.0637905
		-0.00459188		0.0354346
		0.0267349		0.0530644
		-0.0206449		-0.0547049
		-0.0157889		-0.0586263
		0.0394766		0.0504676
		0.0212535		0.0587476
		-0.0391579		-0.0559915
		-0.0621548		-0.068607
		0.0308714		0.0519533
		0.0356892		0.0636229
		-0.0314866		-0.0540059
		-0.0415352		-0.066197
		0.0396798		0.0592755
		0.0217873		0.0714918
		-0.0297763		-0.0546922
		-0.0420524		-0.0591174
		0.041142		0.0518702
		0.0385374		0.0571485
		-0.0360889		-0.0420444
		-0.0280615		-0.049403
		0.0346544		0.0415862
		0.0260439		0.0477491
		-0.0307591		-0.0390743
		-0.0363034		-0.0438098
		0.0371378		0.0377614
		0.0304724		0.0618122
		-0.0346927		-0.0486938
		-0.0355157		-0.0470131
		0.0449286		0.0469734
		0.0363987		0.0491154
		-0.0399248		-0.0471107
		-0.0435199		-0.0529704
		0.0201857		0.0273603
		0.0725548		0.0466107
		-0.0305451		-0.0320125
		-0.0362905		-0.0287635
		0.0297379		0.0403706
		0.078591		0.066286
		-0.0384123		-0.0435977
		-0.0411111		-0.0324948
		0.0401356		0.0610124
		0.0603512		0.0598788
		-0.059773		-0.0419251
		-0.0332687		-0.0431284
		0.0374967		0.0320408
		0.0456343		0.0327309
		-0.0517918		-0.0548319
		-0.0480384		-0.0501825
		0.0012039		0.0238273
		0.0571712		0.0469749
		-0.0568809		-0.046502
		-0.0538213		-0.0363466
		0.0306161		0.0366095
		0.0727172		0.0597916
		-0.0345564		-0.0352074
		-0.0137718		-0.0315054
		0.00116024		0.032412
		0.0596969		0.0494553
		-0.0527467		-0.0352462
		-0.0427222		-0.0455221
		0.0235387		0.0307761
		0.0379051		0.0435339
		-0.0391765		-0.0351629
		-0.0403205		-0.0292274
		0.0198345		0.0221695
		0.0644739		0.0527109
		-0.0350288		-0.037
		-0.0387885		-0.0355424
		0.0200594		0.0157431
		0.0434775		0.046112
		-0.0390158		-0.0489189
		-0.038711		-0.0439519
		0.0226773		0.019316
		0.0635856		0.0405128
		-0.0521992		-0.0366005
		-0.0193466		-0.0412052
		0.0340517		0.0189096
		0.0533469		0.0463823
		-0.0292021		-0.0315947
		-0.0470615		-0.0292464
		0.0394221		0.0327034
		0.0399818		0.0555359
		-0.0625062		-0.0387332
		-0.0506343		-0.0466279
		0.054855		0.0397616
		0.0668329		0.0542764
		-0.0497865		-0.0502331
		-0.0489867		-0.0480055
		0.0156092		0.0215195
		0.0729101		0.0370735
		-0.0561932		-0.055985
		-0.0314619		-0.0415556
		0.0243783		0.0244661
		0.0368714		0.0464401
		-0.0298111		-0.0429791
		-0.0403643		-0.0500318
		0.00993063		0.029691
		0.0476525		0.0540935
		-0.0266636		-0.0275029
		-0.0462781		-0.0447036
		0.0384422		0.0415596
		0.0624945		0.054614
		-0.0200541		-0.0307909
		-0.0284543		-0.0342311
		0.0257206		0.0342854
		0.0179391		0.0445656
		-0.0183564		-0.0306735
		-0.0412134		-0.0303575
		0.0380955		0.0398909
		0.0200967		0.0355458
		-0.0412384		-0.0311316
		-0.0155054		-0.0358222
		0.0126943		0.0150779
		0.00594627		0.0291598
		-0.018941		-0.0217154
		-0.00876963		-0.0262212
		0.0044972		0.0207248
		0.0288627		0.0523903
		-0.0214232		-0.0226404
		-0.00654009		-0.0304153
		0.0018352		0.0323422
		0.0548456		0.0479
		-0.0161751		-0.0263331
		-0.0229433		-0.0403456
		-0.00402627		0.0194254
		0.0250333		0.0503259
		-0.0290993		-0.0231002
		-0.0231896		-0.024323
		0.0179008		0.029146
		0.00909156		0.0318527
		-0.0268907		-0.0390374
		-0.0210901		-0.0458752
		0.0191274		0.019609
		0.0394188		0.0321118
		-0.0217559		-0.0397318
		-0.0199728		-0.0406444
		0.0242396		0.0178123
		0.0378299		0.0471394
		-0.0497327		-0.0406953
		-0.040903		-0.0402225
		0.0317659		0.0369283
		0.0290115		0.0445669
		-0.0391282		-0.0398164
		-0.0288886		-0.0380238
		0.0434856		0.0305177
		0.0331378		0.0522887
		-0.0420256		-0.0327986
		-0.0289544		-0.0446194
		0.0248852		0.0269403
		0.0490135		0.0484637
		-0.0535393		-0.0447524
		-0.0402749		-0.0459329
		0.00278941		0.016122
		0.0463552		0.0483728
		-0.0268958		-0.0281284
		-0.0285243		-0.0433578
		0.0459334		0.03826
		0.0418405		0.0510128
		-0.0247835		-0.0296033
		-0.0380066		-0.0438421
		0.0591749		0.0295271
		0.0415048		0.0500283
		-0.0412618		-0.0382463
		-0.0507428		-0.0358094
		0.0304598		0.0423732
		0.0307018		0.0462208
		-0.0478183		-0.0321875
		-0.0458984		-0.0396847
		0.0317484		0.0233852
		0.0452019		0.0482756
		-0.0191225		-0.0430409
		-0.044297		-0.0496777
		0.0362672		0.0310951
		0.0524836		0.0517417
		-0.0479975		-0.0521287
		-0.0387211		-0.0526269
		0.0565997		0.0321169
		0.0594114		0.0507156
		-0.0509347		-0.0427199
		-0.0547895		-0.0490214
		0.0591744		0.0320403
		0.0352184		0.0531926
		-0.0490303		-0.0252635
		-0.0383583		-0.0419947
		0.0590906		0.0364249
		0.0420872		0.050627
		-0.0504522		-0.0230872
		-0.0208464		-0.0260462
		0.00907113		0.0294434
		0.0498071		0.0496024
		-0.0486551		-0.0316612
		-0.0337877		-0.0257624
		0.0206784		0.0243646
		0.0325977		0.0364673
		-0.0333852		-0.039948
		-0.0372161		-0.0402755
		0.032258		0.0258313
		0.0389706		0.0506525
		-0.0244138		-0.0259851
		-0.0308155		-0.0317654
		0.0287766		0.0174148
		0.0337239		0.0324168
		-0.0492889		-0.0390418
		-0.0411595		-0.0474152
		0.0264376		0.0172134
		0.0610021		0.04634
		-0.0434717		-0.0360446
		-0.0459958		-0.0374395
		0.0220906		0.0331761
		0.03989		0.0442367
		-0.0505661		-0.0343457
		-0.0254497		-0.0356615
		0.0536665		0.0283192
		0.0467398		0.0386505
		-0.0333681		-0.0398487
		-0.0470631		-0.0372695
		0.00853235		0.0234418
		0.0406552		0.0439833
		-0.0292733		-0.0126368
		-0.0320874		-0.0293464
		0.0364898		0.0405967
		0.0476009		0.0547935
		-0.0530266		-0.0166454
		-0.00877667		-0.018508
		0.0366773		0.0405605
		0.0364159		0.0484143
		-0.019658		-0.0311539
		-0.0503494		-0.0454188
		0.0273388		0.0249527
		0.0362349		0.0346299
		-0.0352694		-0.033162
		0.00774055		-0.0439585
		0.00833738		0.0307372
		0.0420657		0.0624961
		-0.0193011		-0.0308591
		-0.0262788		-0.0315231
		0.0194184		0.0359127
		0.0484996		0.0437558
		-0.048842		-0.0442304
		-0.0200193		-0.0519933
		0.0227153		0.0242023
		0.0145086		0.0478409
		-0.0117987		-0.0232281
		-0.0511495		-0.0447716
		0.0391723		0.028055
		0.0293096		0.0392228
		-0.0372394		-0.0497769
		-0.0402278		-0.0552431
		0.0354878		0.0357849
		0.0447575		0.0369587
		-0.0318364		-0.0427196
		-0.0425604		-0.0472945
		0.0417817		0.0341472
		0.0451637		0.0513295
		-0.0195445		-0.02905
		-0.0442094		-0.0407642
		0.0304128		0.0338056
		0.0377703		0.045342
		-0.0303969		-0.0287876
		-0.0493726		-0.0466262
		0.0221718		0.0192196
		0.0241939		0.0463694
		-0.026961		-0.0317675
		-0.0507751		-0.0318461
		0.020915		0.031256
		0.0356686		0.0458035
		-0.00490522		-0.0200886
		-0.0321059		-0.0310936
		0.0507852		0.0352606
		0.0403343		0.0424678
		-0.0596829		-0.0382532
		-0.0421926		-0.0500342
		0.0239833		0.0212949
		0.042821		0.0380153
		-0.0480606		-0.0278673
		-0.0354258		-0.0343952
		0.0199903		0.0327241
		0.022837		0.0392798
		-0.0129759		-0.0373014
		-0.0414469		-0.041348
		0.0217469		0.0271717
		0.049104		0.0446739
		-0.020074		-0.029419
		-0.0290546		-0.0486269
		0.0331107		0.0237406
		0.0441045		0.0494526
		-0.0460071		-0.0496076
		-0.0115311		-0.0464072
		0.0206034		0.0249151
		0.0342887		0.0321921
		-0.0478208		-0.0332829
		-0.0561281		-0.0499579
		0.0237232		0.0219626
		0.0361095		0.0458911
		-0.0178652		-0.0320448
		-0.0506849		-0.0468554
		0.0401451		0.0356394
		0.0501625		0.0447049
		-0.0421917		-0.0303431
		-0.0298374		-0.0376945
		0.0544132		0.031668
		0.0297166		0.0416638
		-0.0208555		-0.0280821
		-0.0540646		-0.0402614
		0.0480831		0.0345626
		0.0411749		0.0336471
		-0.00486734		-0.0247897
		-0.03085		-0.0313586
		0.0384718		0.0244833
		0.0341021		0.036283
		-0.0338236		-0.0330885
		-0.0489185		-0.047207
		0.0241954		0.0283456
		0.062777		0.0512479
		-0.0319433		-0.0227695
		-0.0387054		-0.029138
		0.030545		0.0270112
		0.0217218		0.0287328
		-0.0236909		-0.0271831
		-0.0646388		-0.0478424
		0.05291		0.0322379
		0.0647881		0.0523302
		-0.0504024		-0.0342049
		-0.038596		-0.0425687
		0.0113929		0.0252971
		0.0492077		0.038729
		-0.0328112		-0.0358993
		-0.0560483		-0.0395356
		0.0258066		0.0143948
		0.0231069		0.0386467
		-0.0482567		-0.0285973
		-0.0575787		-0.0380552
		0.00927492		0.020308
		0.0591974		0.0446493
		-0.0240685		-0.0402704
		-0.0329733		-0.0412464
		0.0150644		0.0232609
		0.0543257		0.0429148
		-0.015074		-0.02719
		-0.0294778		-0.0325852
		0.0320434		0.0256277
		0.0351282		0.0435226
		-0.0142173		-0.0255663
		-0.0485194		-0.0489672
		0.0115394		0.0222352
		0.024181		0.0429721
		-0.000934418		-0.0329468
		-0.0139841		-0.0462044
		0.0136411		0.0248997
		0.0477577		0.0435822
		-0.0306396		-0.032292
		-0.0494484		-0.0448556
		0.0344105		0.0364318
		0.0320359		0.0509068
		-0.0326444		-0.0359284
		-0.0541481		-0.035666
		0.0259463		0.0299762
		0.0260097		0.0399476
		-0.0247056		-0.0420509
		-0.0184238		-0.0305291
		0.00717826		0.0234324
		0.0277303		0.0319141
		-0.0119086		-0.031437
		0.0154361		-0.036437
		0.0343903		0.0253909
		0.0198723		0.0340032
		-0.00935197		-0.0423812
		-0.020836		-0.0446867
		0.0199307		0.0177825
		0.0211065		0.0355598
		-0.015886		-0.0296551
		-0.0454533		-0.0390367
		-0.00889515		0.0283083
		0.0215409		0.0433285
		-0.0161505		-0.0291287
		-0.0198878		-0.0365375
		0.0212908		0.0312064
		0.0304758		0.0540643
		-0.0096768		-0.0206872
		-0.0288288		-0.0271176
		0.0408161		0.0353698
		0.0549009		0.0418843
		-0.0143057		-0.0303451
		-0.0364157		-0.0303568
		0.021221		0.0308069
		0.0323941		0.0466705
		-0.0340666		-0.0355772
		-0.0283075		-0.03532
		0.0254302		0.0232492
		0.0224953		0.0423882
		-0.0414693		-0.031136
		-0.0433054		-0.0226737
		0.0202318		0.0114024
		0.0384858		0.0475578
		-0.0117317		-0.0251604
		-0.0378371		-0.0361675
		0.0291264		0.032279
		0.0562311		0.0486914
		-0.0534879		-0.0343537
		-0.0515897		-0.042072
		0.0388756		0.0233988
		0.0212694		0.0419669
		-0.028919		-0.0269466
		-0.0236874		-0.0311106
		0.0482967		0.0244805
		0.0496085		0.0425336
		-0.0278813		-0.0319178
		-0.0624862		-0.0418752
		0.0578071		0.0278968
		0.0488135		0.0512649
		-0.0410794		-0.021851
		-0.0411876		-0.0295972
		0.0430091		0.0184248
		0.0289377		0.0409694
		-0.0303424		-0.0463112
		-0.0247469		-0.0312896
		0.0367078		0.0238083
		0.0205539		0.0388308
		-0.0299723		-0.0376951
		-0.0450102		-0.0350419
		0.0283321		0.0198106
		0.0371337		0.0463765
		-0.0258492		-0.0239358
		-0.0294077		-0.0412167
		0.011589		0.0286618
		0.0622025		0.035851
		-0.0501101		-0.0367454
		-0.0218858		-0.0282486
		0.0360987		0.0183777
		0.0495063		0.0457032
		-0.0478146		-0.0300661
		-0.103102		-0.0455233
		0.0539703		0.0175783
		0.0388877		0.0369805
		-0.0176151		-0.018515
		-0.0280289		-0.0323098
		0.0575132		0.0203518
		0.0425305		0.0342208
		-0.037143		-0.0282363
		-0.0651657		-0.0301372
		0.0284816		0.015937
		0.0402316		0.0383893
		-0.0602302		-0.0304823
		-0.0298103		-0.0227629
		0.00861129		0.0127043
		0.0628363		0.0421065
		-0.00611508		-0.0127219
		-0.0427296		-0.0257483
		0.0326168		0.0282129
		0.0522681		0.0340343
		-0.039366		-0.022774
		-0.0527762		-0.0368548
		0.0303362		0.0198559
		0.052926		0.0328174
		-0.0116788		-0.0178872
		-0.0189208		-0.0429138
		0.0167431		0.00361423
		0.012528		0.0290783
		-0.0511805		-0.031061
		-0.0415846		-0.0443928
		0.0353331		0.0228936
		0.0390016		0.0274749
		-0.0213575		-0.0234493
		-0.0148759		-0.0340598
		0.00218099		0.0162647
		0.0408797		0.0279365
		-0.0484713		-0.0323123
		-0.0465406		-0.041937
		0.0408545		0.0266809
		0.0522594		0.0358665
		-0.0162885		-0.0158149
		-0.0130911		-0.0282892
		0.0113604		0.0246984
		0.0436363		0.0387041
		-0.0163448		-0.0156251
		-0.0581301		-0.0363646
		0.0169685		0.0193883
		0.0273992		0.0330248
		-0.00574397		-0.012518
		-0.0379924		-0.0268005
		0.00813033		0.0217582
		-0.00121701		0.0181195
		-0.00903975		-0.0238225
		-0.0460032		-0.0311589
		0.0357182		0.0337406
		0.0480166		0.0362313
		-0.0227099		-0.0159723
		-0.0219176		-0.046701
		0.0198003		0.0157146
		0.0485661		0.0399997
		-0.0222957		-0.025889
		-0.0651822		-0.0350459
		0.0347656		0.0269084
		0.0100641		0.0269729
		-0.012534		-0.0158817
		-0.0377176		-0.0349183
		0.0318728		0.0328969
		0.0296246		0.0236343
		-0.0263747		-0.0242868
		-0.034544		-0.0375148
		0.0355629		0.0255802
		0.0415177		0.0296954
		-0.026439		-0.0145014
		-0.0481518		-0.0314923
		0.0284169		0.0313531
		0.0221456		0.026412
		-0.0189033		-0.0186452
		-0.0277973		-0.04822
		0.0476964		0.0294525
		0.0421816		0.0274336
		-0.00874252		-0.00896608
		-0.0146872		-0.0315018
		0.0232124		0.0222894
		0.0177705		0.0238296
		-0.0429093		-0.0226883
		-0.0499904		-0.0380618
		0.0184663		0.0271925
		0.0456475		0.0445195
		-0.0223696		-0.00794911
		-0.0428252		-0.0388813
		0.0388963		0.0331929
		0.0142691		0.0395105
		-0.0253749		-0.0231017
		-0.0387807		-0.039071
		0.0270608		0.0287871
		0.050361		0.0357466
		-0.0206176		-0.00940996
		-0.00126171		-0.0433433
		0.0309889		0.0272006
		0.00477201		0.0310753
		-0.0327327		-0.0176583
		-0.0539874		-0.0351187
		0.0307007		0.0363802
		0.0101007		0.0408188
		-0.00644619		-0.0221268
		-0.057325		-0.0328653
		0.0466488		0.0286261
		0.0524018		0.0330591
		-0.0207846		-0.0245218
		-0.0418123		-0.0444909
		0.0222968		0.00990485
		0.0335017		0.0287161
		-0.0260123		-0.0404549
		-0.0263604		-0.0436114
		0.0153434		0.0124162
		0.0214889		0.0410962
		-0.0149678		-0.0210924
		-0.0249884		-0.036095
		0.0389406		0.0304586
		0.0726691		0.03666
		-0.00773945		-0.0175689
		-0.0106847		-0.0345913
		0.0388815		0.0398196
		0.0638272		0.055873
		0.0169272		0.00895551
		1.42109e-14		0
