# Supplementary material for: Caveolae couple mechanical stress to integrin recycling and activation
Source: eLife. 2022 Oct 20;11:e82348. doi: 10.7554/eLife.82348 (PMC9747151; doi:10.7554/eLife.82348)
Supplement: Figure 2—source data 2. [file elife-82348-fig2-data2.xlsx]

## Sheet: Reinforcement FN panel 2G
		N=38		N=61		N= 19		N=15
Stiffness (nN/um)		Cav1WT	StError	Cav1KO	StError	Cav1KO+PTRF	StError	Cav1KO+Cav1	StError
	20	1	0	1	0	1	0	1	0
	30	1.02434	0.0352581	1.03787	0.0196893	0.958755	0.032858	1.02364	0.0592507
	40	1.04542	0.0401569	1.11125	0.0324148	0.939532	0.0405602	1.17978	0.127914
	50	1.06498	0.0470087	1.12741	0.0404079	0.88146	0.0685845	1.04307	0.0949012
	60	1.04739	0.0405386	1.17817	0.0532934	0.922007	0.0735683	1.09504	0.0986672
	70	1.04055	0.0417721	1.21175	0.0613128	1.02223	0.0738936	1.07887	0.0971558
	80	1.04308	0.0440423	1.23475	0.0734356	1.03433	0.0772271	1.11286	0.119318
	90	1.06469	0.053304	1.26073	0.0744161	1.10763	0.0877272	1.06617	0.105497
	100	1.09837	0.0684491	1.27018	0.0822437	1.12121	0.0959695	1.05285	0.112736
	110	1.07251	0.0675558	1.27838	0.0892459	1.14086	0.100355	1.13933	0.135653
	120	1.06476	0.0593778	1.31628	0.0972026	1.1374	0.127822	1.1337	0.120855
	130	1.0611	0.0641934	1.38843	0.10338	1.21372	0.134441	1.04523	0.0835592
	Increment	6.11045	6.41934	38.8428	10.338	21.3725	13.4441	4.52254	8.35592

## Sheet: Reinforcement ConA panel 2H
		N=29		N=39		N= 32		N=32
Stiffness (nN/um)		Cav1WT	StError	Cav1KO	StError	Cav1KO+PTRF	StError	Cav1KO+Cav1	StError
	20	1	0	1	0	1	0	1	0
	30	1.24711	0.0449343	1.12244	0.0408902	1.14331	0.0662095	1.17853	0.0358983
	40	1.39799	0.071331	1.30398	0.0722584	1.30595	0.102181	1.33013	0.0688326
	50	1.48778	0.078041	1.39881	0.0916368	1.40165	0.132965	1.42796	0.0972924
	60	1.54648	0.0834896	1.4591	0.122366	1.44242	0.144845	1.56978	0.143285
	70	1.5724	0.0939683	1.52744	0.126089	1.55567	0.161773	1.64383	0.172622
	80	1.61284	0.10671	1.59308	0.124963	1.72105	0.218296	1.66923	0.139209
	90	1.66748	0.12337	1.63434	0.159158	1.85364	0.24461	1.71908	0.121427
	100	1.7141	0.134586	1.62671	0.168397	1.93348	0.271158	1.76213	0.124274
	110	1.84627	0.151736	1.67101	0.171614	1.97465	0.276265	1.82652	0.14317
	120	1.84032	0.178309	1.68714	0.164598	2.04481	0.285979	1.7759	0.157772
	130	1.88437	0.189318	1.80274	0.189559	2.00291	0.260975	1.86436	0.16188
	Increment	88.4368	18.9318	80.2744	18.9559	100.291	26.0975	86.4362	16.188
