# Supplementary material for: Caveolae couple mechanical stress to integrin recycling and activation
Source: eLife. 2022 Oct 20;11:e82348. doi: 10.7554/eLife.82348 (PMC9747151; doi:10.7554/eLife.82348)
Supplement: Figure 3—figure supplement 1—source data 3. [file elife-82348-fig3-figsupp1-data3.xlsx]

## Sheet: Fibronectin panel 1B
		50.000 celulas
		2ug/ml	5ug/ml	10ug/ml
	Cav1WT	0.638667	0.2516	0.2964
	Cav1KO	1.053	0.3865	0.4514
	WT/WT	1	1	1
	KO/WT	1.64875	1.53617	1.52294

## Sheet: Collagen panel 1C
		100.000 celulas
		45 min
		2ug/ml	5ug/ml	10ug/ml
	Cav1WT	0.372	0.3985	0.3815
	Cav1KO	0.389	0.95	1.025
	WT/WT	1	1	1
	KO/WT	1.0457	2.38394	2.68676

## Sheet: Vitronectin panel 1D
		100.000 cells	50000 cells
		45min	2h
		2ug/ml	5ug/ml
	Cav1WT	0.819	0.243667
	Cav1KO	2.1985	0.389
	WT/WT	1	1
	KO/WT	2.68437	1.59644

## Sheet: 9EG7 intensity panel 1K
	We have select a ROI around the beads and then we have enlarged it by 10 pixels an quantified the fluorescent intensity. Afterwards normalizaion was done dividing by that enlarged area
	WT	Fibronectin WT 9EG7					KO	Fibronectin KO 9EG7
	Bead Number	Area	Mean	Perim	Normalized Mean Intensity		Bead Number	Area	Mean	Perim	Normalized Mean Intensity
	1	15.123	69.593	13.783	4.6018		1	22.85	99.845	16.924	4.36958
	2	15.123	25.065	13.783	1.65741		2	22.85	116.617	16.924	5.10359
	3	16.06	28.862	14.202	1.79714		3	22.85	102.871	16.924	4.50201
	4	15.123	32.484	13.783	2.14799		4	22.85	77.967	16.924	3.41212
	5	15.123	128.443	13.783	8.49322		5	22.85	117.756	16.924	5.15344
	6	16.06	110.403	14.202	6.87441		6	16.06	43.514	14.202	2.70946
	7	16.06	101.724	14.202	6.334		7	16.06	57.908	14.202	3.60573
	8	16.06	55.67	14.202	3.46638		8	19.325	54.321	15.588	2.81092
	9	16.06	48.252	14.202	3.00448		9	19.325	90.704	15.588	4.69361
	10	14.298	39.567	13.405	2.76731		10	19.325	86.9	15.588	4.49677
	11	14.298	66.209	13.405	4.63065		11	20.972	60.024	16.211	2.8621
	12	26.284	12.361	18.167	0.470286		12	20.972	78.655	16.211	3.75048
	13	26.284	8.271	18.167	0.314678		13	20.972	83.305	16.211	3.9722
	14	26.284	8.355	18.167	0.317874		14	27.764	91.207	18.705	3.28508
	15	26.284	9.02	18.167	0.343175		15	27.764	116.754	18.705	4.20523
	16	26.284	12.932	18.167	0.49201		16	27.764	93.075	18.705	3.35236
	17	26.284	15.787	18.167	0.600632		17	27.764	113.92	18.705	4.10316
	18	26.284	20.161	18.167	0.767045		18	27.764	104.404	18.705	3.76041
	19	26.284	9.506	18.167	0.361665		19	27.764	95.335	18.705	3.43376
	20	26.284	11.02	18.167	0.419266		20	27.764	111.975	18.705	4.0331
	21	26.284	7.553	18.167	0.287361		21	27.764	99.505	18.705	3.58396
	22	26.284	22.735	18.167	0.864975		22	26.284	19.712	18.167	0.749962
	23	26.284	30.609	18.167	1.16455		23	26.284	17.954	18.167	0.683077
	24	26.284	23.411	18.167	0.890694		24	26.284	17.823	18.167	0.678093
	25	26.284	5.27	18.167	0.200502		25	26.284	65.466	18.167	2.49072
	26	26.284	14.168	18.167	0.539035		26	26.284	48.348	18.167	1.83945
	27	26.284	5.454	18.167	0.207503		27	26.284	18.768	18.167	0.714047
	28	26.284	10.267	18.167	0.390618		28	26.284	46.055	18.167	1.75221
	29	26.284	27.101	18.167	1.03108		29	26.284	85.182	18.167	3.24083
	30	26.284	14.181	18.167	0.53953		30	26.284	32.617	18.167	1.24095
	31	26.284	14.574	18.167	0.554482		31	26.284	6.163	18.167	0.234477
	32	26.284	11.143	18.167	0.423946		32	26.284	7.771	18.167	0.295655
	33	26.284	4.556	18.167	0.173337		33	26.284	26.384	18.167	1.0038
	34	26.284	7.57	18.167	0.288008		34	26.284	57.372	18.167	2.18277
	35	26.284	11.74	18.167	0.44666		35	26.284	23.727	18.167	0.902716
	36	26.284	7.919	18.167	0.301286		36	26.284	34.865	18.167	1.32647
	37	26.284	4.073	18.167	0.154961		37	26.284	24.013	18.167	0.913598
	38	26.284	10.701	18.167	0.40713		38	26.284	16.398	18.167	0.623878
	39	26.284	29.819	18.167	1.13449		39	26.284	36.4	18.167	1.38487
	40	26.284	90.268	18.167	3.43433		40	26.284	46.536	18.167	1.77051
							41	26.284	23.324	18.167	0.887384
				Average	1.5824		42	26.284	69.063	18.167	2.62757
				SEM	0.322573		43	26.284	33.539	18.167	1.27602
							44	26.284	26.767	18.167	1.01838
							45	26.284	29.07	18.167	1.106
							46	26.284	81.795	18.167	3.11197
		P value and statistical significance:
		The two-tailed P value equals 0.0166								Average	2.50553
		By conventional criteria, this difference is considered to be statistically significant.								SEM	0.217236
		Confidence interval:
		The mean of WT minus KO equals -0.9300
		95% confidence interval of this difference: From -1.6863 to -0.1737
				Cav1WT	Cav1KO
			Average	1.5824	2.50553
			SEM	0.322573	0.217236
