# Supplementary material for: Caveolae couple mechanical stress to integrin recycling and activation
Source: eLife. 2022 Oct 20;11:e82348. doi: 10.7554/eLife.82348 (PMC9747151; doi:10.7554/eLife.82348)
Supplement: Figure 3—source data 1. [file elife-82348-fig3-data1.xlsx]

## Sheet: Reinforcement FN p190 panel 3C
		N=45		N=27		N= 32
Stiffness (nN/um)		Cav1KO+Empty	StError	Cav1KO+Scrambled	StError	Cav1KO+shp190	StError
	20	1	0	1	0	1	0
	30	1.08749	0.0311814	1.14796	0.0675212	1.0523	0.0371582
	40	1.19115	0.0498182	1.18134	0.0640137	1.09216	0.0490954
	50	1.22937	0.0593895	1.2156	0.104549	1.17206	0.063288
	60	1.26544	0.0674561	1.23912	0.0983743	1.19058	0.0682225
	70	1.35249	0.0987077	1.47035	0.132476	1.18591	0.065192
	80	1.38956	0.12142	1.46853	0.138664	1.15257	0.0811445
	90	1.43327	0.172266	1.35931	0.122726	1.14962	0.098444
	100	1.57158	0.24416	1.433	0.129784	1.27955	0.0982969
	110	1.59007	0.195026	1.37468	0.126508	1.37944	0.119614
	120	1.51502	0.154014	1.36955	0.142755	1.43837	0.165092
	130	1.48757	0.170638	1.37937	0.162326	1.37825	0.140322
	Increment	48.7567	17.0638	37.9366	16.2326	37.8246	14.0322

## Sheet: Traction Force panel 3D
29 kPa	Spread Area	sem	Aspect ratio	sem	Mean force	sem	Total force	sem	Strain Energy	sem
Sup1	855.957	100.158	2.05519	0.265327	148.008	10.8158	19547.9	3319.42	3.65986e-13	1.02407e-13
Sup2	1134.53	102.96	2.04042	0.248935	151.744	11.8016	25199.1	2520.58	4.61604e-13	7.70519e-14
Sup3	928.653	72.8824	2.40648	0.343901	204.12	15.1431	28696.7	3262.43	7.19185e-13	1.21364e-13
	29 kPa
	Cav1KO+Empty	148.008	10.8158
	Cav1KO+Scrambled	151.744	11.8016
	Cav1KO+sh190	204.12	15.1431
														Figure

## Sheet: Cell adhesion to ConA panel 3E
		Cav1WT	Cav1KO	Cav1KO+PTRF
14-5-2015	ConcanavalinA	0.166	0.189	0.164
		0.258	0.229	0.188		0.179	PBS+1%BSA
		0.183	0.182	0.175
	Average ConA	1.13035	1.11732	0.981378
		Cav1WT	Cav1KO	Cav1KO+PTRF
21-5-2015	ConcanavalinA	0.158	0.159	0.163
		0.162	0.163	0.169		0.166	PBS+1%BSA
		0.167	0.192	0.186
	Average ConA	0.977912	1.03213	1.04016
		Cav1WT	Cav1KO	Cav1KO+PTRF
28-5-2015	ConcanavalinA	0.131	0.176	0.129
		0.112	0.124	0.117		0.122	PBS+1%BSA
		0.13	0.118	0.135
	Average ConA	1.01913	1.14208	1.04098
		Cav1WT	Cav1KO	Cav1KO+PTRF
2015-06-06	ConcanavalinA	0.163	0.154	0.161
		0.175	0.146	0.159		0.14	PBS+1%BSA
		0.281	0.156	0.152
	Average ConA	1.47381	1.08571	1.12381
		Cav1WT	Cav1KO	Cav1KO+PTRF
2015-10-06	ConcanavalinA	0.139	0.127	0.131
		0.133	0.128	0.138		0.118	PBS+1%BSA
		0.135	0.134	0.135
	Average ConA	1.14972	1.09887	1.14124
		Cav1WT	Cav1KO	Cav1KO+PTRF
18/6/2015	ConcanavalinA	0.148	0.141	0.135
		0.142	0.134	0.14		0.132	PBS+1%BSA
		0.142	0.151	0.14
	Average ConA	1.09091	1.07576	1.04798
		Cav1WT	Cav1KO	Cav1KO+PTRF
25/6/2015	ConcanavalinA	0.32	0.366	0.468
		0.396	0.368	0.35
		0.366	0.346	0.51
	Average ConA	5.38308	5.37313	6.60697
		Cav1WT	Cav1KO	Cav1KO+PTRF
2015-01-07	ConcanavalinA	0.247	0.11	0.255
		0.282	0.138	0.264		0.055	PBS+1%BSA
		0.227	0.111	0.313
	Average ConA	4.58182	2.17576	5.04242
		Cav1WT	Cav1KO	Cav1KO+PTRF	Cav1KO+Cav1
25/5/2016	ConcanavalinA	0.0485	0.0645	0.0755	0.081
		0.0485	0.0765	0.0825	0.075	0.046	PBS+1%BSA
		0.046	0.0625	0.0545	0.06
	Average ConA	1.03623	1.47464	1.53986	1.56522
		Cav1WT	Cav1KO	Cav1KO+PTRF	Cav1KO+Cav1
2016-03-06	ConcanavalinA	0.1925	0.1815	0.2485	0.109
		0.1745	0.182	0.2215	0.128	0.047	PBS+1%BSA
		0.1735	0.1835	0.248	0.13
	Average ConA	3.83333	3.87943	5.0922	2.60284
		Cav1WT	Cav1KO	Cav1KO+PTRF	Cav1KO+Cav1
18/6/2016	ConcanavalinA	0.172	0.1255	0.24	0.1645
		0.2105	0.14	0.2235	0.1485	0.042	PBS+1%BSA
		0.1805	0.13	0.2245	0.143
	Average ConA	4.46825	3.13889	5.46032	3.61905
		Cav1WT	Cav1KO	Cav1KO+PTRF	Cav1KO+Cav1
2016-10-02	ConcanavalinA	0.294			0.392
		0.299			0.398	0.042	PBS+1%BSA
		0.308			0.384
	Average ConA	7.15079
		Cav1WT	Cav1KO	Cav1KO+PTRF	Cav1KO+Cav1
2016-07-07	ConcanavalinA	0.317	0.409	0.31	0.265
		0.36	0.349	0.247	0.256	0.042	PBS+1%BSA
		0.381	0.382	0.283	0.366
	Average ConA	8.39683	9.04762	6.66667	7.03968
		Cav1WT	Cav1KO	Cav1KO+PTRF	Cav1KO+Cav1
22/7/2016	ConcanavalinA	0.114	0.182	0.15	0.175
		0.14	0.165	0.181	0.238	0.06	PBS+1%BSA
		0.164	0.203	0.195	0.267
	Average ConA	2.32222	3.05556	2.92222	3.77778
		Cav1WT	Cav1KO	Cav1KO+PTRF	Cav1KO+Cav1
	Average ConA	3.14389	2.66899	3.05432	3.72091
	StError ConA	0.67253	0.652576	0.64894	0.919917

## Sheet: Cell adhesion to FN panel 3F
		Cav1WT	Cav1KO	Cav1KO+PTRF	Cav1KO+Cav1
25/5/2016	Fibronectin	0.0555	0.0615	0.0705	0.0915
		0.054	0.0615	0.0705	0.093		0.04	PBS+1%BSA
		0.059	0.071	0.1045	0.085
	Average FN	1.40417	1.61667	2.04583	2.24583
		Cav1WT	Cav1KO	Cav1KO+PTRF	Cav1KO+Cav1
2016-03-06	Fibronectin	0.176	0.175	0.1925	0.1345
		0.1725	0.166	0.211	0.1345		0.0455	PBS+1%BSA
		0.1755	0.186	0.223	0.1215
	Average FN	3.83883	3.86081	4.58974	2.86081
		Cav1WT	Cav1KO	Cav1KO+PTRF	Cav1KO+Cav1
Summary 2014	Fibronectin	6.17065	7.98635	19.0762
		9.71875	15.1473	14.1994
		9.16285	27.8244	23.257
		13.8104	16.6789	14.7431
		10.5524	14.9143	11.1683
		Cav1WT	Cav1KO	Cav1KO+PTRF	Cav1KO+Cav1
18/6/2016	Fibronectin	0.1815	0.1665	0.2355	0.174
		0.1765	0.1555	0.1895	0.1495		0.0405	PBS+1%BSA
		0.18	0.1485	0.2085	0.1645
	Average FN	3.98519	3.48519	4.69259	3.61481
		Cav1WT	Cav1KO	Cav1KO+PTRF	Cav1KO+Cav1
2016-10-02	Fibronectin	0.348			0.383
		0.365			0.453		0.0405	PBS+1%BSA
		0.333			0.411
	Average FN	7.74815			9.23704
		Cav1WT	Cav1KO	Cav1KO+PTRF	Cav1KO+Cav1
2016-07-07	Fibronectin	0.305	0.347	0.248	0.286
		0.234	0.327	0.222	0.287		0.0405	PBS+1%BSA
		0.268	0.362	0.272	0.302
	Average FN	5.97778	7.67407	5.4963	6.48148
		Cav1WT	Cav1KO	Cav1KO+PTRF	Cav1KO+Cav1
22/7/2016	Fibronectin	0.172	0.186	0.206	0.241
		0.176	0.211	0.237	0.31		0.06	PBS+1%BSA
		0.163	0.201	0.216	0.346
	Average FN	2.83889	3.32222	3.66111	4.98333
ARACELI DATA
																	AVERAGE
	2006-02-02	2006-02-06	2006-02-09	2007-03-14	2007-03-29	2007-03-14	2007-05-24	2007-05-30	2007-05-31	2007-05-18	2007-05-24	2007-05-30	2007-05-31	2007-05-18	2007-05-14
wt MEFs			0.359333	0.399	0.2516	0.399	0.386667	0.360667	0.429167	0.310444	0.268667	0.264333	0.533833	0.26	0.183944		0.338974
			5.98889	6.65	4.19333	6.65	6.44444	6.01111	7.15278	5.17407	4.47778	4.40556	8.89722	4.33333	3.06574		5.64956
ko MEFs	3.454	1.46	0.562667	0.611	0.3865	0.611	0.567667	0.416167	0.477667	0.390167	0.548111	0.329167	0.517667	0.357111	0.290944		0.731989
	57.5667	24.3333	9.37778	10.1833	6.44167	10.1833	9.46111	6.93611	7.96111	6.50278	9.13519	5.48611	8.62778	5.95185	4.84907		12.1998
		Cav1WT	Cav1KO	Cav1KO+PTRF	Cav1KO+Cav1
	Average FN	6.19385	11.4203	10.293	4.90388
	StError FN	0.56873	2.2877	2.30925	1.06728
