# Supplementary material for: Caveolae couple mechanical stress to integrin recycling and activation
Source: eLife. 2022 Oct 20;11:e82348. doi: 10.7554/eLife.82348 (PMC9747151; doi:10.7554/eLife.82348)
Supplement: Figure 4—figure supplement 1—source data 1. [file elife-82348-fig4-figsupp1-data1.xlsx]

## Sheet: TIRF quant. panel 1F
				Cav1WT before Hypoosmotic				Cav1WT during Hypoosmotic 1/20
				ROI 1	ROI 2	ROI 3	ROI 4	ROI 1	ROI 2	ROI 3	ROI 4
	Absoute of Value-(value n-1)			0.0839657	0.0510831	0.085263	0.0881886	0.181782	0.0999963	0.104152	0.0886138
			Average	0.0771251				0.118636
			SEM	0.0100753				0.0213033
				Cav1WT before Hypoosmotic				Cav1WT during Hypoosmotic 1/20
				ROI 1	ROI 2	ROI 3	ROI 4	ROI 1	ROI 2	ROI 3	ROI 4
	Absoute of Value-(value n-1)			0.0426945	0.0300085	0.0993089	0.052217	0.0529837	0.042133	0.098986	0.0615785
			Average	0.0560572				0.0639203
			SEM	0.0174565				0.012347
				Cav1WT before Hypoosmotic			Cav1WT during Hypoosmotic 1/20
				ROI 1	ROI 2	ROI 3	ROI 1	ROI 2	ROI 3
	Absoute of Value-(value n-1)			0.110758	0.0309301	0.0419778	0.0460615	0.031001	0.0535528
			Average	0.061222			0.0435384
			SEM	0.0249725			0.00574283
				Cav1WT before Hypoosmotic			Cav1WT during Hypoosmotic 1/20
				ROI 1	ROI 2	ROI 3	ROI 1	ROI 2	ROI 3
	Absoute of Value-(value n-1)			0.0856225	0.0326631	0.0339199	0.0819536	0.0352182	0.0649365
			Average	0.0507351			0.0607028
			SEM	0.0174475			0.0118268
				Cav1WT before Hypoosmotic			Cav1WT during Hypoosmotic 1/20
				ROI 1	ROI 2	ROI 3	ROI 1	ROI 2	ROI 3
	Absoute of Value-(value n-1)			0.0324404	0.157769	0.0550759	0.0369347	0.0653982	0.0380106
			Average	0.0817619			0.0467811
			SEM	0.0385614			0.00806591
				Cav1WT before Hypoosmotic				Cav1WT during Hypoosmotic 1/20
				ROI 1	ROI 2	ROI 3	ROI 4	ROI 1	ROI 2	ROI 3	ROI 4
	Absoute of Value-(value n-1)			0.0713347	0.0125553	0.0154218	0.0457008	0.0203666	0.0140421	0.0400857	0.0971454
			Average	0.0362531				0.04291
			SEM	0.0160399				0.0189099
				Cav1WT before Hypoosmotic				Cav1WT during Hypoosmotic 1/20
				ROI 1	ROI 2	ROI 3	ROI 4	ROI 1	ROI 2	ROI 3	ROI 4
	Absoute of Value-(value n-1)			0.0313451	0.0506618	0.0190313	0.0214606	0.0409711	0.05395	0.0185753	0.029308
			Average	0.0306247				0.0357011
			SEM	0.00830255				0.00761007
				Cav1WT before Hypoosmotic				Cav1WT during Hypoosmotic 1/20
				ROI 1	ROI 2	ROI 3	ROI 4	ROI 1	ROI 2	ROI 3	ROI 4
	Absoute of Value-(value n-1)			0.0427658	0.0469175	0.0455648	0.0650101	0.0424396	0.0363631	0.0738047	0.0738047
			Average	0.0500645				0.056603
			SEM	0.00505631				0.0100086
				Cav1WT before Hypoosmotic				Cav1WT during Hypoosmotic 1/20
				ROI 1	ROI 2	ROI 3	ROI 4	ROI 1	ROI 2	ROI 3	ROI 4
	Absoute of Value-(value n-1)			0.114632	0.0745709	0.152647	0.0541144	0.0556359	0.197752	0.21311	0.0596867
			Average	0.0989911				0.131546
			SEM	0.0218591				0.0427804
				Cav1WT before Hypoosmotic				Cav1WT during Hypoosmotic 1/20
				ROI 1	ROI 2	ROI 3	ROI 4	ROI 1	ROI 2	ROI 3	ROI 4
	Absoute of Value-(value n-1)			0.0588542	0.0485627	0.0752453	0.076315	0.0526484	0.0443161	0.0578135	0.0789732
			Average	0.0647443				0.0584378
			SEM	0.00671249				0.00738824
				Cav1WT before Hypoosmotic				Cav1WT during Hypoosmotic 1/20
				ROI 1	ROI 2	ROI 3	ROI 4	ROI 1	ROI 2	ROI 3	ROI 4
	Absoute of Value-(value n-1)			0.0750486	0.0656239	0.0785804	0.0883342	0.0982231	0.0959303	0.115281	0.0863993
			Average	0.0768968				0.0989585
			SEM	0.00469167				0.00601305
				Cav1WT before Hypoosmotic				Cav1WT during Hypoosmotic 1/20
				ROI 1	ROI 2	ROI 3	ROI 4	ROI 1	ROI 2	ROI 3	ROI 4
	Absoute of Value-(value n-1)			0.144799	0.097831	0.020484	0.0774677	0.0793982	0.0830617	0.0912223	0.0847178
			Average	0.0851455				0.0846
			SEM	0.0257546				0.0024714
				Cav1WT before Hypoosmotic			Cav1WT during Hypoosmotic 1/20
				ROI 1	ROI 2	ROI 3	ROI 1	ROI 2	ROI 3
	Absoute of Value-(value n-1)			0.0843978	0.0284813	0.0505458	0.104949	0.0469558	0.0853404
			Average	0.054475			0.0790818
			SEM	0.0162608			0.0147494
				Cav1WT before Hypoosmotic				Cav1WT during Hypoosmotic 1/20
				ROI 1	ROI 2	ROI 3	ROI 4	ROI 1	ROI 2	ROI 3	ROI 4
	Absoute of Value-(value n-1)			0.0913835	0.0194828	0.0106625	0.0542993	0.0797512	0.0775424	0.0545609	0.0688459
			Average	0.043957				0.0701751
			SEM	0.0184023				0.0057122
				Cav1WT before Hypoosmotic				Cav1WT during Hypoosmotic 1/20
				ROI 1	ROI 2	ROI 3	ROI 4	ROI 1	ROI 2	ROI 3	ROI 4
	Absoute of Value-(value n-1)			0.0327626	0.0199616		0.0408807	0.0607977	0.0657042	0.0775383	0.0763348
			Average	0.0312016				0.0700938
			SEM	0.00608906				0.00408306
				Cav1WT before Hypoosmotic				Cav1WT during Hypoosmotic 1/20
				ROI 1	ROI 2	ROI 3	ROI 4	ROI 1	ROI 2	ROI 3	ROI 4
	Absoute of Value-(value n-1)			0.0714799	0.0340358	0.0312836	0.0539896	0.112435	0.187308	0.103348	0.0831036
			Average	0.0476972				0.121549
			SEM	0.00940412				0.0227608
				Cav1WT before Hypoosmotic				Cav1WT during Hypoosmotic 1/20
				ROI 1	ROI 2	ROI 3	ROI 4	ROI 1	ROI 2	ROI 3	ROI 4
	Absoute of Value-(value n-1)			0.0251729	0.0657726	0.0637881	0.075091	0.0648414	0.0562956	0.0695439	0.0545144
			Average	0.0574562				0.0612988
			SEM	0.0110395				0.00355424
				Cav1WT before Hypoosmotic				Cav1WT during Hypoosmotic 1/20
				ROI 1	ROI 2	ROI 3	ROI 4	ROI 1	ROI 2	ROI 3	ROI 4
	Absoute of Value-(value n-1)			0.0666326	0.0505226	0.0795262	0.110483	0.0814563	0.112584	0.1045	0.0960123
			Average	0.0767912				0.0986382
			SEM	0.0127013				0.00665186
				Cav1WT before Hypoosmotic				Cav1WT during Hypoosmotic 1/20
				ROI 1	ROI 2	ROI 3	ROI 4	ROI 1	ROI 2	ROI 3	ROI 4
	Absoute of Value-(value n-1)			0.0188624	0.0191801	0.0216321	0.0541908	0.0885426	0.0830837	0.0566605
			Average	0.0284663				0.0760956
			SEM	0.00859711				0.00984449
				Cav1WT before Hypoosmotic				Cav1WT during Hypoosmotic 1/20
				ROI 1	ROI 2	ROI 3	ROI 4	ROI 1	ROI 2	ROI 3	ROI 4
	Absoute of Value-(value n-1)			0.0316151	0.0481969	0.0461611	0.0544731	0.0629096	0.0530707	0.0892087	0.0730108
			Average	0.0451116				0.06955
			SEM	0.00483401				0.0077142
				Cav1WT before Hypoosmotic				Cav1WT during Hypoosmotic 1/20
				ROI 1	ROI 2	ROI 3	ROI 4	ROI 1	ROI 2	ROI 3	ROI 4
	Absoute of Value-(value n-1)			0.0698697	0.0573572	0.0840325	0.0568404	0.0261163	0.0329952	0.0350427	0.0893326
			Average	0.067025				0.0458717
			SEM	0.00641964				0.0146122
				Cav1WT before Hypoosmotic				Cav1WT during Hypoosmotic 1/20
				ROI 1	ROI 2	ROI 3	ROI 4	ROI 1	ROI 2	ROI 3	ROI 4
	Absoute of Value-(value n-1)			0.0370715	0.0394685	0.064286	0.0668046	0.0611947	0.0746003	0.0678106	0.0939605
			Average	0.0519076				0.0743915
			SEM	0.00790563				0.00707374
				Cav1WT before Hypoosmotic				Cav1WT during Hypoosmotic 1/20
				ROI 1	ROI 2	ROI 3	ROI 4	ROI 1	ROI 2	ROI 3	ROI 4
	Absoute of Value-(value n-1)			0.0352678	0.122281	0.0752431	0.0618795	0.0399319	0.0798416	0.0711822	0.0894829
			Average	0.0736678				0.0701097
			SEM	0.01821				0.0107311
				Cav1WT before Hypoosmotic				Cav1WT during Hypoosmotic 1/20
				ROI 1	ROI 2	ROI 3	ROI 4	ROI 1	ROI 2	ROI 3	ROI 4
	Absoute of Value-(value n-1)			0.0545715	0.033532	0.101004	0.0524307	0.0664402	0.0703663	0.0661659	0.0780319
			Average	0.0603846				0.0702511
			SEM	0.0143413				0.00276534
				Cav1WT before Hypoosmotic				Cav1WT during Hypoosmotic 1/20
				ROI 1	ROI 2	ROI 3	ROI 4	ROI 1	ROI 2	ROI 3	ROI 4
	Absoute of Value-(value n-1)			0.0318263	0.0702948	0.0277929	0.0449343	0.0175295	0.012589	0.0110212	0.0277482
			Average	0.0437121				0.017222
			SEM	0.00958655				0.00377281
				Cav1WT before Hypoosmotic				Cav1WT during Hypoosmotic 1/20
				ROI 1	ROI 2	ROI 3	ROI 4	ROI 1	ROI 2	ROI 3	ROI 4
	Absoute of Value-(value n-1)			0.0235655	0.0350094	0.0282147	0.0742444	0.0830112	0.079873	0.10688	0.0870558
			Average	0.0402585				0.089205
			SEM	0.0115697				0.00607224
				Cav1WT before Hypoosmotic				Cav1WT during Hypoosmotic 1/20
				ROI 1	ROI 2	ROI 3	ROI 4	ROI 1	ROI 2	ROI 3	ROI 4
	Absoute of Value-(value n-1)			0.0223729	0.0807854	0.102744	0.0824611	0.0324151	0.020789	0.0506245	0.0417682
			Average	0.0720909				0.0363992
			SEM	0.0173076				0.0063949
				Cav1WT before Hypoosmotic				Cav1WT during Hypoosmotic 1/20
				ROI 1	ROI 2	ROI 3	ROI 4	ROI 1	ROI 2	ROI 3	ROI 4
	Absoute of Value-(value n-1)			0.0713121	0.0263389	0.154066	0.0951859	0.0265012	0.033861	0.0634441	0.0424237
			Average	0.0867258				0.0415575
			SEM	0.0265996				0.00798802
				Cav1WT before Hypoosmotic				Cav1WT during Hypoosmotic 1/20
				ROI 1	ROI 2	ROI 3	ROI 4	ROI 1	ROI 2	ROI 3	ROI 4
	Absoute of Value-(value n-1)			0.0231229	0.0311802	0.0438176	0.047046	0.0779794	0.100258	0.0974178	0.117179
			Average	0.0362917				0.0982085
			SEM	0.00556655				0.0080308
				Cav1WT before Hypoosmotic			Cav1WT during Hypoosmotic 1/20
			Average	0.0581669			0.0700701
			SEM	0.00349363			0.00507987

## Sheet: Long Recycl. panel 1G
	WT											KO
	0 min		2 min			5 min					10 min	0 min		2 min			5 min					10 min
	1-12-2016 First Attempt
	0.63		0.553			0.434					0.302	0.392		0.365			0.283					0.404
	0.371		0.246			0.317					0.283	0.478		0.31			0.243					0.3
	Normalized by each time 0min
	1		0.877778			0.688889					0.479365	1		0.931122			0.721939					1.03061
	1		0.663073			0.854447					0.762803	1		0.648536			0.508368					0.627615
	16-12-2016 Second Attempt
	0.483		0.332			0.394					0.419	0.613		0.448			0.447					0.328
	0.482		0.274			0.35					0.326	0.438		0.45			0.282					0.34
	Normalized by each time 0min
	1		0.687371			0.815735					0.867495	1		0.730832			0.729201					0.535073
	1		0.568465			0.726141					0.676349	1		1.0274			0.643836					0.776256
	27-12-2016 Third Attempt
	0.408		0.307			0.343					0.286	0.268		0.228			0.266					0.249
	0.281		0.249			0.235					0.201	0.287		0.233			0.239					0.277
	Normalized by each time 0min
	1		0.752451			0.840686					0.70098	1		0.850746			0.992537					0.929104
	1		0.886121			0.836299					0.715302	1		0.811847			0.832753					0.965157
	28-12-2016 Fourth Attempt
	0.351		0.258			0.222					0.211	0.432		0.319			0.254					0.261
	0.253		0.205			0.195					0.165	0.308		0.188			0.2					0.241
	Normalized by each time 0min
	1		0.735043			0.632479					0.60114	1		0.738426			0.587963					0.604167
	1		0.810277			0.770751					0.652174	1		0.61039			0.649351					0.782468
	0.407375		0.303			0.31125					0.274125	0.402		0.317625			0.27675					0.3
	0.043333		0.0382641			0.0303996					0.0286347	0.0406663		0.0350566			0.0260972					0.0195174
	Normalized by each time 0min
	1		0.747572			0.770678					0.681951	1		0.793662			0.708243					0.781306
	0		0.0385231			0.0286689					0.0402953	0		0.0497791			0.0532827					0.0645666

## Sheet: Short Recycl. panel 1H
	WT						KO
	0 min	1 min		3 min		5 min	0 min	1 min		3 min		5 min
	9-1-2017 First Attempt
	0.504	0.396		0.386		0.461	0.406	0.391		0.387		0.462
	0.372	0.355		0.299		0.343	0.345	0.331		0.35		0.435
	Normalized by each time 0min
	1	0.785714		0.765873		0.914683	1	0.963054		0.953202		1.13793
	1	0.954301		0.803763		0.922043	1	0.95942		1.01449		1.26087
	20-1-2017 Second Attempt
	0.378	0.332		0.295		0.345	0.481	0.508		0.452		0.418
	0.371	0.364		0.23		0.242	0.554	0.451		0.488		0.467
	Normalized by each time 0min
	1	0.878307		0.780423		0.912698	1	1.05613		0.939709		0.869023
	1	0.981132		0.619946		0.652291	1	0.814079		0.880866		0.84296
	26-1-2017 Third Attempt
	0.655	0.607		0.618		0.59	0.576	0.582		0.561		0.348
	0.58	0.552		0.572		0.586	0.599	0.561		0.65		0.433
	Normalized by each time 0min
	1	0.926718		0.943511		0.900763	1	1.01042		0.973958		0.604167
	1	0.951724		0.986207		1.01034	1	0.936561		1.08514		0.722871
	2-2-2017 Seventh Attempt
	0.553	0.508		0.419		0.397	0.423	0.45		0.508		0.438
	0.745	0.673		0.527		0.535	0.515	0.523		0.541		0.459
	Normalized by each time 0min
	1	0.918626		0.757685		0.717902	1	1.06383		1.20095		1.03546
	1	0.903356		0.707383		0.718121	1	1.01553		1.05049		0.891262
	0.51975	0.473375		0.41825		0.437375	0.487375	0.474625		0.492125		0.4325
	0.049653	0.0457157		0.0502237		0.0448637	0.03179	0.030246		0.0341182		0.0134629
	Normalized by each time 0min
	1	0.902565		0.839577		0.896406	1	0.969773		0.968786		0.934369
	0	0.0259339		0.0405064		0.0392094	0	0.0371281		0.019999		0.105934

## Sheet: Short Recycl. panel 1I
	0 min	1 min		3 min		5 min
	Normalized by each time 0min
	1.00055	0.869518		0.9375		0.863487	1	0.96793		0.954325		0.917881
	0.999539	0.96911		0.993545		0.953896	0.999508	1.01131		1.01278		1.01426
	1	0.830151		0.924025		0.904137	1	1.04033		1.01633		1.01889
	0.999585	0.902985		0.84743		0.81592	1.00046	1.01801		0.951062		0.957987
	1	0.959057		0.966177		0.921228	1	1.00143		0.996662		0.950405
	1.0005	0.968876		0.936747		0.870984	1	1.08814		1.03045		0.956197
	1.00003	0.916616		0.934237		0.888275	0.999995	1.02119		0.993602		0.969269
	0.000176253	0.0239222		0.0201614		0.0198261	0.000123114	0.0165162		0.0136676		0.0161045

## Sheet: Short Recycl. panel 1J
	Cav1KO+Empty				Cav1KO+Cav1
	0 min	1 min	3 min	5 min
	Normalized by each time 0min
	1	0.985965	0.974269	0.803509	1	0.736156	0.741585	0.740499
	0.999348	0.865623	0.881279	0.810176	1	0.969888	0.923669	0.806022
	1.00106	0.805112	0.783813	0.72524	1.00136	1.01355	1.02168	0.97561
	1	1.09932	0.844749	0.777397	0.998557	1.02742	1.08658	0.894661
	0.99899	0.814141	0.768687	0.776768	1	0.716435	0.866898	0.694444
	1.00121	0.895758	0.973333	0.875152	1.00074	0.825926	0.814074	0.756296
	0 min	1 min		3 min		5 min
	Normalized by each time 0min
	1.0001	0.910986		0.871022		0.794707	1.00011	0.881562		0.909081		0.811256
	0.00036452	0.0461763		0.0365153		0.0201951	0.000382797	0.0571551		0.0526808		0.0430766

## Sheet: SurfaceLDL panel 1K
100.000 Cav1WT plated on p6 normal plate were treated with 100ugr/ml LDL O/N and withouth replating total surface active Beta1 integrin was analyzed
1º.- READ	FIDEL
	WT FIRST	WT SECOND	WT THIRD	WT+100ug/ml ON LDL FIRST	WT+100ug/ml ON LDL SECOND	WT+100ug/ml ON LDL THIRD
Beta 1 9EG7	0.725	0.727	0.708	0.694	0.708	0.803
2º.- READ	FIDEL
	WT FIRST	WT SECOND	WT THIRD	WT+100ug/ml ON LDL FIRST	WT+100ug/ml ON LDL SECOND	WT+100ug/ml ON LDL THIRD
Beta 1 9EG7	0.726	0.727	0.709	0.682	0.706	0.804
3º.- READ	FIDEL
	WT FIRST	WT SECOND	WT THIRD	WT+100ug/ml ON LDL FIRST	WT+100ug/ml ON LDL SECOND	WT+100ug/ml ON LDL THIRD
Beta 1 9EG7	0.731	0.731	0.714	0.671	0.709	0.759
	0.727333	0.728333	0.710333	0.682333	0.707667	0.788667
	0.722
	1.00739	1.00877	0.983841	0.94506	0.980148	1.09234
	0.612	0.647	0.726	0.835	0.805	0.734667
	0.661667
	0.924937	0.977834	1.09723	1.26196	1.21662	1.11033
	0.727333	0.707667	0.726	0.621667	0.758667	0.777333
	0.720333
	1.00972	0.982416	1.00787	0.863026	1.05322	1.07913
	0.379	0.394667	0.393667	0.401333	0.417	0.403
	0.389111
	0.974015	1.01428	1.01171	1.03141	1.07167	1.03569
	0.523	0.469	0.509	0.527333	0.534	0.537
	0.500333
	1.0453	0.937375	1.01732	1.05396	1.06729	1.07328
	0.551667	0.622667	0.592333	0.611667	0.627667	0.649333
	0.588889
	0.936792	1.05736	1.00585	1.03868	1.06585	1.10264
	1	0.0100728
	1.06346	0.020738

## Sheet: SurfaceU18666A panel 1Kbis
100.000 Cav1WT plated on p6 normal plate were treated with 2-5-10ugr/ml U18666A and withouth replating total surface active Beta1 integrin was analyzed
1º.- READ	FIDEL
	WT FIRST	WT SECOND	WT THIRD	WT+2ug/ml ON U18666A FIRST	WT+5ug/ml ON U18666A SECOND	WT+10ug/ml ON U18666A THIRD
Beta 1 9EG7	0.241	0.292	0.689	0.743	0.661	0.325
2º.- READ	FIDEL
	WT FIRST	WT SECOND	WT THIRD	WT+2ug/ml ON U18666A FIRST	WT+5ug/ml ON U18666A SECOND	WT+10ug/ml ON U18666A THIRD
Beta 1 9EG7	0.24	0.291	0.687	0.74	0.659	0.323
3º.- READ	FIDEL
	WT FIRST	WT SECOND	WT THIRD	WT+2ug/ml ON U18666A FIRST	WT+5ug/ml ON U18666A SECOND	WT+10ug/ml ON U18666A THIRD
Beta 1 9EG7	0.24	0.29	0.685	0.743	0.658	0.323
	0.240333	0.291	0.687	0.742
	0.406111
	0.591792	0.716553	1.69166	1.82709
	0.876667	0.871667	0.868333	0.956	0.959	0.939
	0.872222
	1.0051	0.999363	0.995541	1.09605	1.09949	1.07656
	0.893667	0.898	0.905	0.898	0.940333	0.908333
	0.898889
	0.99419	0.999011	1.0068	0.999011	1.04611	1.01051
	0.829333	0.785333	0.834333	0.862	0.872333	0.812667
	0.816333
	1.01592	0.962025	1.02205	1.05594	1.0686	0.995508
	0.576667	0.577667	0.554667	0.580667	0.594667	0.571667
	0.569667
	1.01229	1.01404	0.973669	1.01931	1.04389	1.00351
	0.604	0.586	0.581	0.639333	0.608333	0.584333
	0.590333
	1.02315	0.99266	0.98419	1.083	1.03049	0.989836
	0.604667	0.753667	0.487667	0.751	0.711333	0.705
	0.615333
	0.982665	1.22481	0.792524	1.22048	1.15601	1.14572
	0.661667	0.710667	0.418	0.778	0.745333	0.781667
	0.596778
	1.10873	1.19084	0.700428	1.30367	1.24893	1.30981
	1	0.0417338
	1.12861	0.0391969

## Sheet: 9EG7-EEA-1Col. panel 1N
Image File	Image Serie	Channels Analyzed (ch1 vs. ch2)	Pearson coeff.	Normalized by Mean Control	M1	M2	ICQ	Ch1 threshold range	Ch2 threshold range
Cav1WT_LDL_9EG7_488_EEA1_647.lif	Cav1WT_Control_9EG7_488_EEA1_647	Ch_Reference_actBCh_AND_Ch_DextranCh	0.551	1.08217	0.912	0.868	0.366	0; 0	0; 0\n			Cav1WT		Average	SEM
Cav1WT_LDL_9EG7_488_EEA1_647.lif	Cav1WT_Control_9EG7_488_EEA1_647_2	Ch_Reference_actBCh_AND_Ch_DextranCh	0.595	1.16859	0.895	0.82	0.385	0; 0	0; 0\n				9EG7 vs EEA1 Control	0.50916	0.0197967
Cav1WT_LDL_9EG7_488_EEA1_647.lif	Cav1WT_Control_9EG7_488_EEA1_647_3	Ch_Reference_actBCh_AND_Ch_DextranCh	0.581	1.1411	0.925	0.825	0.375	0; 0	0; 0\n				9EG7 vs EEA1 +100ug LDL O/N	0.59128	0.0136818
Cav1WT_LDL_9EG7_488_EEA1_647.lif	Cav1WT_Control_9EG7_488_EEA1_647_4	Ch_Reference_actBCh_AND_Ch_DextranCh	0.632	1.24126	0.889	0.8	0.417	0; 0	0; 0\n
Cav1WT_LDL_9EG7_488_EEA1_647.lif	Cav1WT_Control_9EG7_488_EEA1_647_5	Ch_Reference_actBCh_AND_Ch_DextranCh	0.334	0.655982	0.837	0.567	0.335	0; 0	0; 0\n
Cav1WT_LDL_9EG7_488_EEA1_647.lif	Cav1WT_Control_9EG7_488_EEA1_647_6	Ch_Reference_actBCh_AND_Ch_DextranCh	0.567	1.1136	0.891	0.748	0.374	0; 0	0; 0\n
Cav1WT_LDL_9EG7_488_EEA1_647.lif	Cav1WT_Control_9EG7_488_EEA1_647_7	Ch_Reference_actBCh_AND_Ch_DextranCh	0.51	1.00165	0.913	0.633	0.385	0; 0	0; 0\n
Cav1WT_LDL_9EG7_488_EEA1_647.lif	Cav1WT_Control_9EG7_488_EEA1_647_8	Ch_Reference_actBCh_AND_Ch_DextranCh	0.476	0.934873	0.935	0.833	0.34	0; 0	0; 0\n
Cav1WT_LDL_9EG7_488_EEA1_647.lif	Cav1WT_Control_9EG7_488_EEA1_647_9	Ch_Reference_actBCh_AND_Ch_DextranCh	0.574	1.12735	0.889	0.706	0.407	0; 0	0; 0\n
Cav1WT_LDL_9EG7_488_EEA1_647.lif	Cav1WT_Control_9EG7_488_EEA1_647_10	Ch_Reference_actBCh_AND_Ch_DextranCh	0.605	1.18823	0.917	0.775	0.405	0; 0	0; 0\n
Cav1WT_LDL_9EG7_488_EEA1_647.lif	Cav1WT_Control_9EG7_488_EEA1_647_11	Ch_Reference_actBCh_AND_Ch_DextranCh	0.375	0.736507	0.894	0.75	0.385	0; 0	0; 0\n
Cav1WT_LDL_9EG7_488_EEA1_647.lif	Cav1WT_Control_9EG7_488_EEA1_647_12	Ch_Reference_actBCh_AND_Ch_DextranCh	0.607	1.19216	0.942	0.776	0.403	0; 0	0; 0\n
Cav1WT_LDL_9EG7_488_EEA1_647.lif	Cav1WT_Control_9EG7_488_EEA1_647_13	Ch_Reference_actBCh_AND_Ch_DextranCh	0.536	1.05271	0.913	0.795	0.408	0; 0	0; 0\n
Cav1WT_LDL_9EG7_488_EEA1_647.lif	Cav1WT_Control_9EG7_488_EEA1_647_14	Ch_Reference_actBCh_AND_Ch_DextranCh	0.627	1.23144	0.923	0.782	0.412	0; 0	0; 0\n
Cav1WT_LDL_9EG7_488_EEA1_647.lif	Cav1WT_Control_9EG7_488_EEA1_647_15	Ch_Reference_actBCh_AND_Ch_DextranCh	0.66	1.29625	0.94	0.842	0.405	0; 0	0; 0\n
Cav1WT_LDL_9EG7_488_EEA1_647.lif	Cav1WT_Control_9EG7_488_EEA1_647_16	Ch_Reference_actBCh_AND_Ch_DextranCh	0.446	0.875953	0.902	0.752	0.364	0; 0	0; 0\n
Cav1WT_LDL_9EG7_488_EEA1_647.lif	Cav1WT_Control_9EG7_488_EEA1_647_17	Ch_Reference_actBCh_AND_Ch_DextranCh	0.27	0.530285	0.773	0.667	0.32	0; 0	0; 0\n
Cav1WT_LDL_9EG7_488_EEA1_647.lif	Cav1WT_Control_9EG7_488_EEA1_647_18	Ch_Reference_actBCh_AND_Ch_DextranCh	0.406	0.797392	0.876	0.734	0.371	0; 0	0; 0\n
Cav1WT_LDL_9EG7_488_EEA1_647.lif	Cav1WT_Control_9EG7_488_EEA1_647_19	Ch_Reference_actBCh_AND_Ch_DextranCh	0.482	0.946657	0.911	0.794	0.326	0; 0	0; 0\n
Cav1WT_LDL_9EG7_488_EEA1_647.lif	Cav1WT_Control_9EG7_488_EEA1_647_20	Ch_Reference_actBCh_AND_Ch_DextranCh	0.448	0.879881	0.903	0.76	0.358	0; 0	0; 0\n
Cav1WT_LDL_9EG7_488_EEA1_647.lif	Cav1WT_Control_9EG7_488_EEA1_647_21	Ch_Reference_actBCh_AND_Ch_DextranCh	0.483	0.948621	0.932	0.824	0.391	0; 0	0; 0\n
Cav1WT_LDL_9EG7_488_EEA1_647.lif	Cav1WT_Control_9EG7_488_EEA1_647_22	Ch_Reference_actBCh_AND_Ch_DextranCh	0.513	1.00754	0.877	0.661	0.404	0; 0	0; 0\n
Cav1WT_LDL_9EG7_488_EEA1_647.lif	Cav1WT_Control_9EG7_488_EEA1_647_23	Ch_Reference_actBCh_AND_Ch_DextranCh	0.578	1.1352	0.897	0.726	0.405	0; 0	0; 0\n
Cav1WT_LDL_9EG7_488_EEA1_647.lif	Cav1WT_Control_9EG7_488_EEA1_647_24	Ch_Reference_actBCh_AND_Ch_DextranCh	0.433	0.85042	0.876	0.74	0.339	0; 0	0; 0\n
Cav1WT_LDL_9EG7_488_EEA1_647.lif	Cav1WT_Control_9EG7_488_EEA1_647_25	Ch_Reference_actBCh_AND_Ch_DextranCh	0.44	0.864168	0.92	0.794	0.38	0; 0	0; 0\n
		Average	0.50916	1
		SEM		0.0388811
Cav1WT_LDL_9EG7_488_EEA1_647.lif	Cav1WT+100ugLDL_Control_9EG7_488_EEA1_647	Ch_Reference_actBCh_AND_Ch_DextranCh	0.587	1.15288	0.929	0.812	0.399	0; 0	0; 0\n
Cav1WT_LDL_9EG7_488_EEA1_647.lif	Cav1WT+100ugLDL_Control_9EG7_488_EEA1_647_2	Ch_Reference_actBCh_AND_Ch_DextranCh	0.447	0.877917	0.883	0.731	0.337	0; 0	0; 0\n
Cav1WT_LDL_9EG7_488_EEA1_647.lif	Cav1WT+100ugLDL_Control_9EG7_488_EEA1_647_3	Ch_Reference_actBCh_AND_Ch_DextranCh	0.527	1.03504	0.951	0.835	0.347	0; 0	0; 0\n
Cav1WT_LDL_9EG7_488_EEA1_647.lif	Cav1WT+100ugLDL_Control_9EG7_488_EEA1_647_4	Ch_Reference_actBCh_AND_Ch_DextranCh	0.611	1.20002	0.947	0.855	0.383	0; 0	0; 0\n
Cav1WT_LDL_9EG7_488_EEA1_647.lif	Cav1WT+100ugLDL_Control_9EG7_488_EEA1_647_5	Ch_Reference_actBCh_AND_Ch_DextranCh	0.606	1.1902	0.959	0.879	0.352	0; 0	0; 0\n
Cav1WT_LDL_9EG7_488_EEA1_647.lif	Cav1WT+100ugLDL_Control_9EG7_488_EEA1_647_6	Ch_Reference_actBCh_AND_Ch_DextranCh	0.625	1.22751	0.985	0.918	0.317	0; 0	0; 0\n
Cav1WT_LDL_9EG7_488_EEA1_647.lif	Cav1WT+100ugLDL_Control_9EG7_488_EEA1_647_7	Ch_Reference_actBCh_AND_Ch_DextranCh	0.595	1.16859	0.966	0.884	0.336	0; 0	0; 0\n
Cav1WT_LDL_9EG7_488_EEA1_647.lif	Cav1WT+100ugLDL_Control_9EG7_488_EEA1_647_8	Ch_Reference_actBCh_AND_Ch_DextranCh	0.618	1.21376	0.959	0.871	0.372	0; 0	0; 0\n
Cav1WT_LDL_9EG7_488_EEA1_647.lif	Cav1WT+100ugLDL_Control_9EG7_488_EEA1_647_9	Ch_Reference_actBCh_AND_Ch_DextranCh	0.547	1.07432	0.944	0.826	0.382	0; 0	0; 0\n
Cav1WT_LDL_9EG7_488_EEA1_647.lif	Cav1WT+100ugLDL_Control_9EG7_488_EEA1_647_10	Ch_Reference_actBCh_AND_Ch_DextranCh	0.652	1.28054	0.961	0.885	0.373	0; 0	0; 0\n
Cav1WT_LDL_9EG7_488_EEA1_647.lif	Cav1WT+100ugLDL_Control_9EG7_488_EEA1_647_11	Ch_Reference_actBCh_AND_Ch_DextranCh	0.643	1.26286	0.961	0.868	0.375	0; 0	0; 0\n
Cav1WT_LDL_9EG7_488_EEA1_647.lif	Cav1WT+100ugLDL_Control_9EG7_488_EEA1_647_12	Ch_Reference_actBCh_AND_Ch_DextranCh	0.65	1.27661	0.95	0.866	0.387	0; 0	0; 0\n
Cav1WT_LDL_9EG7_488_EEA1_647.lif	Cav1WT+100ugLDL_Control_9EG7_488_EEA1_647_13	Ch_Reference_actBCh_AND_Ch_DextranCh	0.637	1.25108	0.954	0.845	0.341	0; 0	0; 0\n
Cav1WT_LDL_9EG7_488_EEA1_647.lif	Cav1WT+100ugLDL_Control_9EG7_488_EEA1_647_14	Ch_Reference_actBCh_AND_Ch_DextranCh	0.634	1.24519	0.947	0.844	0.385	0; 0	0; 0\n
Cav1WT_LDL_9EG7_488_EEA1_647.lif	Cav1WT+100ugLDL_Control_9EG7_488_EEA1_647_15	Ch_Reference_actBCh_AND_Ch_DextranCh	0.616	1.20984	0.958	0.881	0.364	0; 0	0; 0\n
Cav1WT_LDL_9EG7_488_EEA1_647.lif	Cav1WT+100ugLDL_Control_9EG7_488_EEA1_647_16	Ch_Reference_actBCh_AND_Ch_DextranCh	0.618	1.21376	0.933	0.778	0.365	0; 0	0; 0\n
Cav1WT_LDL_9EG7_488_EEA1_647.lif	Cav1WT+100ugLDL_Control_9EG7_488_EEA1_647_17	Ch_Reference_actBCh_AND_Ch_DextranCh	0.561	1.10181	0.928	0.813	0.36	0; 0	0; 0\n
Cav1WT_LDL_9EG7_488_EEA1_647.lif	Cav1WT+100ugLDL_Control_9EG7_488_EEA1_647_18	Ch_Reference_actBCh_AND_Ch_DextranCh	0.674	1.32375	0.936	0.822	0.404	0; 0	0; 0\n
Cav1WT_LDL_9EG7_488_EEA1_647.lif	Cav1WT+100ugLDL_Control_9EG7_488_EEA1_647_19	Ch_Reference_actBCh_AND_Ch_DextranCh	0.631	1.2393	0.922	0.799	0.375	0; 0	0; 0\n
Cav1WT_LDL_9EG7_488_EEA1_647.lif	Cav1WT+100ugLDL_Control_9EG7_488_EEA1_647_20	Ch_Reference_actBCh_AND_Ch_DextranCh	0.56	1.09985	0.933	0.812	0.36	0; 0	0; 0\n
Cav1WT_LDL_9EG7_488_EEA1_647.lif	Cav1WT+100ugLDL_Control_9EG7_488_EEA1_647_21	Ch_Reference_actBCh_AND_Ch_DextranCh	0.669	1.31393	0.937	0.826	0.378	0; 0	0; 0\n
Cav1WT_LDL_9EG7_488_EEA1_647.lif	Cav1WT+100ugLDL_Control_9EG7_488_EEA1_647_22	Ch_Reference_actBCh_AND_Ch_DextranCh	0.523	1.02718	0.911	0.729	0.366	0; 0	0; 0\n
Cav1WT_LDL_9EG7_488_EEA1_647.lif	Cav1WT+100ugLDL_Control_9EG7_488_EEA1_647_23	Ch_Reference_actBCh_AND_Ch_DextranCh	0.441	0.866132	0.877	0.713	0.38	0; 0	0; 0\n
Cav1WT_LDL_9EG7_488_EEA1_647.lif	Cav1WT+100ugLDL_Control_9EG7_488_EEA1_647_24	Ch_Reference_actBCh_AND_Ch_DextranCh	0.659	1.29429	0.926	0.798	0.406	0; 0	0; 0\n
Cav1WT_LDL_9EG7_488_EEA1_647.lif	Cav1WT+100ugLDL_Control_9EG7_488_EEA1_647_25	Ch_Reference_actBCh_AND_Ch_DextranCh	0.451	0.885773	0.905	0.731	0.379	0; 0	0; 0\n
		Average	0.59128	1.16129
		SEM		0.0268713
