# Supplementary material for: Caveolae couple mechanical stress to integrin recycling and activation
Source: eLife. 2022 Oct 20;11:e82348. doi: 10.7554/eLife.82348 (PMC9747151; doi:10.7554/eLife.82348)
Supplement: Figure 4—source data 1. [file elife-82348-fig4-data1.xlsx]

## Sheet: FRAP Figure 4C
	Beta1 GFP FRAP						Total time: 2 minutes
	Cav1WT MEFs		Cav1KO MEFs
	Average	St Error	Average	St Error
11	1	0	1	0
12	1.25859	0.0241736	1.29259	0.0167629
13	1.4444	0.0314614	1.47445	0.025681
14	1.62279	0.0340397	1.62557	0.0337763
15	1.74775	0.0402628	1.74726	0.0392773
16	1.85566	0.044714	1.82664	0.0468604
17	1.92015	0.0450537	1.89031	0.0497027
18	1.99128	0.0493356	1.99062	0.0550884
19	2.06193	0.0491037	2.05198	0.0570144
20	2.10943	0.0499561	2.10624	0.0552342
21	2.19517	0.0578005	2.11346	0.0525741
22	2.2625	0.0579232	2.20639	0.0598224
23	2.29572	0.0588916	2.21222	0.0591084
24	2.36089	0.0619832	2.26648	0.0582861
25	2.35593	0.063702	2.29031	0.058892
26	2.39784	0.0659117	2.29979	0.0607847
27	2.43272	0.0669333	2.32605	0.062889
28	2.41908	0.0660773	2.37383	0.0673585
29	2.49366	0.0701382	2.41386	0.068378
30	2.50476	0.0679539	2.4427	0.070592
31	2.54411	0.0705991	2.46728	0.0701792
32	2.56762	0.0678243	2.48345	0.0760873
33	2.5448	0.0753498	2.4939	0.0720603
34	2.57477	0.0759762	2.52843	0.0726246
35	2.6523	0.074519	2.54826	0.0744106
36	2.64572	0.0753568	2.56616	0.0767521
37	2.67304	0.0738537	2.59976	0.076807
38	2.67871	0.0762811	2.58054	0.0759005
39	2.68073	0.0760901	2.61178	0.0770923
40	2.72662	0.0760036	2.60749	0.073306
41	2.69835	0.0777284	2.6412	0.0748544
42	2.70255	0.0753219	2.64315	0.0756662
43	2.73445	0.0775988	2.65088	0.0760147
44	2.75222	0.0783135	2.69169	0.0814968
45	2.79177	0.0807359	2.69893	0.0853203
46	2.76953	0.0816022	2.72262	0.0891132
47	2.79289	0.0772628	2.735	0.0874145
48	2.79992	0.0773116	2.7326	0.0847203
49	2.79844	0.0763551	2.72383	0.0825342
50	2.85292	0.076721	2.73803	0.083158
51	2.86376	0.0860854	2.75581	0.0875624
52	2.89627	0.083255	2.77695	0.0883961
53	2.86513	0.0828041	2.79364	0.0829699
54	2.93704	0.0882134	2.74904	0.0809792
55	2.91511	0.088291	2.80845	0.0807344
56	2.92711	0.0838798	2.7993	0.0861472
57	2.88827	0.0850504	2.82973	0.0866105
58	2.92792	0.0818809	2.82073	0.0805238
59	2.92653	0.0887033	2.82786	0.0791501
60	2.92643	0.0849535	2.82749	0.0777845
61	2.94053	0.0844253	2.82073	0.0757244
62	2.95419	0.0859482	2.86005	0.0793605
63	2.94384	0.0888787	2.84975	0.0810718
64	2.95412	0.0887321	2.86401	0.0797152
65	2.96606	0.0893254	2.85327	0.0764214
66	2.99196	0.0923996	2.87288	0.0766117
67	2.97011	0.0858397	2.91749	0.0838086
68	3.03282	0.0887834	2.90906	0.08626
69	3.06823	0.0956194	2.90849	0.0828058
70	2.99937	0.0869344	2.92478	0.0902981
71	3.0449	0.092333	2.93407	0.0869859
72	3.02659	0.0892015	2.95911	0.0884898
73	3.0383	0.092451	2.93956	0.0918749
74	3.0637	0.0916266	2.9265	0.0875419
75	3.08704	0.0912477	2.95882	0.089961
76	3.08076	0.0880168	2.95699	0.090029
77	3.0833	0.0880246	2.98574	0.0885977
78	3.10185	0.094017	2.99677	0.0881375
79	3.12723	0.0969031	2.98096	0.0874064
80	3.13561	0.097128	3.00363	0.090711
81	3.08345	0.0908947	3.00539	0.0898312
82	3.10375	0.0926186	3.02978	0.0917255
83	3.08808	0.0912287	3.03776	0.0890502
84	3.11283	0.0947947	3.05408	0.0905999
85	3.13607	0.0940901	3.05032	0.0890991
86	3.15303	0.0943152	3.0364	0.0888235
87	3.1159	0.0915804	3.05728	0.0943738
88	3.10555	0.0929061	3.07945	0.0936805
89	3.12034	0.0884943	3.07684	0.0955502
90	3.13088	0.0929037	3.0553	0.0928883
91	3.13372	0.0903424	3.05568	0.0960852
92	3.13334	0.096957	3.07533	0.0980764
93	3.1661	0.0984881	3.07605	0.0930008
94	3.13219	0.0982452	3.11175	0.0968973
95	3.17888	0.0942022	3.0867	0.0933319
96	3.15453	0.0934728	3.09874	0.0934731
97	3.139	0.0941548	3.09282	0.0921922
98	3.17377	0.0985765	3.07539	0.0944363
99	3.16371	0.0924387	3.10252	0.0962907
100	3.17052	0.0954863	3.11226	0.0959033
101	3.1146	0.0967009	3.09448	0.0946512
102	3.166	0.0942432	3.10855	0.0955527
103	3.1602	0.0937673	3.11898	0.0946761
104	3.14836	0.0901996	3.10983	0.096561
105	3.14544	0.0965298	3.09615	0.0975492
106	3.17888	0.0955863	3.12343	0.097224
107	3.15472	0.0979839	3.11886	0.0987243
108	3.16947	0.0968547	3.13829	0.0984272
109	3.16048	0.0985164	3.13712	0.0969044
110	3.16408	0.094755	3.13859	0.0968797
111	3.18941	0.100405	3.15618	0.103213
112	3.18588	0.0953987	3.15752	0.101123

## Sheet: Endocytosis Total Figure 4F
Normalized by timepoint Total
1	0.23053		0.470405			0.479751					0.520249	1	0.33218		0.532872			0.404844					0.598616
1	0.23224		0.437158			0.546448					0.546448	1	0.220708		0.506812			0.498638					0.544959
1	0.231385		0.453782			0.513099					0.533349	1	0.276444		0.519842			0.451741					0.571788
Normalized by timepoint Total
1	0.161928		0.36403			0.456737					0.534611	1	0.157685		0.381238			0.484365					0.40652
Normalized by timepoint Total
1	0.126626		0.304423			0.41804					0.455334	1	0.135299		0.380746			0.415438					0.41804
1	0.1325		0.45375			0.66125					0.73375	1	0.225086		0.372852			0.382302					0.418385
1	0.129563		0.379087			0.539645					0.594542	1	0.180193		0.376799			0.39887					0.418212
Normalized by timepoint Total
1	0.116658		0.305981			0.441424					0.481957	1	0.286014		0.396543			0.408067					0.459927
1	0.150548		0.259647			0.455455					0.540257	1	0.280625		0.4041			0.452416					0.489019
1	0.133603		0.282814			0.448439					0.511107	1	0.283319		0.400321			0.430241					0.474473
Normalized by timepoint Total
1	0.147201		0.339637			0.441602					0.493882	1	0.197929		0.358423			0.391079					0.375149
1	0.133772		0.35307			0.455775					0.505482	1	0.221007		0.390863			0.406482					0.460758
1	0.140486		0.346353			0.448688					0.499682	1	0.209468		0.374643			0.398781					0.417953
Normalized by timepoint Total OLD ONE
1	0.441355		0.702288			0.738778					0.760498	1	0.252973		0.706667			0.776577					0.80036
Normalized by timepoint Total OLD ONE
1	0.228117		0.356574			0.482001					0.558924	1	0.212882		0.366084			0.457787					0.495269
1	0.228674		0.267384			0.395341					0.468459	1	0.236938		0.341437			0.345428					0.496734
Average
	0.194179		0.384529			0.497717					0.549988		0.229944		0.42822			0.451952					0.496978
St Error
0	0.0260222		0.0350345			0.029666					0.0281708	0	0.0156737		0.0303306			0.0321096					0.0328976
Total	0min		2min			5min					10min	Total	0min		2min			5min					10min
Cav1WT												Cav1KO

## Sheet: Net Recycling Figure 4G
Normalized by each time 0min
1	0.911232		0.862319		0.891304	1	0.786693		0.679061		0.663405
1	0.997135		0.805158		0.797994	1	0.858804		0.818937		0.714286
1	0.954183		0.833738		0.844649	1	0.822748		0.748999		0.688845
Normalized by each time 0min
1	1.06613		0.846774		0.906452	1	0.760802		0.76929		0.661265
1	0.900415		0.879668		0.80249	1	0.885854		0.883902		0.80878
1	0.983272		0.863221		0.854471	1	0.823328		0.826596		0.735023
Normalized by each time 0min
1	0.848263		0.729433		0.948812	1	0.5625		0.684659		0.637784
1	0.994545		0.814545		1.15091	1	0.897482		0.935252		0.809353
1	0.921404		0.771989		1.04986	1	0.729991		0.809955		0.723568
Normalized by each time 0min
1	1.19465		1.46229		1.09489	1	0.733711		0.614731		0.753541
1	0.908582		0.893657		0.828358	1	0.535503		0.467456		0.446746
1	1.05161		1.17797		0.961624	1	0.634607		0.541093		0.600143
Normalized by each time 0min
1	0.859649		0.859649		0.785088	1	0.776596		0.719858		0.618794
1	0.862454		0.749071		0.752788	1	0.808581		0.60066		0.547855
1	0.861051		0.80436		0.768938	1	0.792588		0.660259		0.583325
Average
1	0.954305		0.890256		0.895909	1	0.760653		0.717381		0.666181
St Error
0	0.0348352		0.0658046		0.0425822	0	0.0391498		0.044394		0.0359035
0min	1min		3min		5min

## Sheet: Endocytosis 9EG7 Figure 4H
Normalized by timepoint Total
1	0.27193		0.359649			0.412281					0.508772	1	0.28972		0.23053			0.242991					0.314642
1	0.250836		0.26087			0.29097					0.347826	1	0.201954		0.263844			0.270358					0.312704
1	0.261383		0.310259			0.351625					0.428299	1	0.245837		0.247187			0.256674					0.313673
Normalized by timepoint Total
1	0.118865		0.150307			0.195552					0.235429	1	0.244735		0.201162			0.231663					0.189542
Normalized by timepoint Total
1	0.260594		0.420491			0.462257					0.4901	1	0.155112		0.234878			0.179403					0.184176
Normalized by timepoint Total
1	0.114152		0.31509			0.351837					0.337764	1	0.248439		0.299792			0.151978					0.414296
1	0.101198		0.231737			0.235329					0.253892	1	0.105381		0.304185			0.233184					0.488042
1	0.107675		0.273413			0.293583					0.295828	1	0.17691		0.301989			0.192581					0.451169
Normalized by timepoint Total
1	0.138267		0.237585			0.278481					0.30185	1	0.219585		0.24184			0.222057					0.272502
1	0.119058		0.201449			0.256225					0.286555	1	0.175422		0.231238			0.232645					0.354128
1	0.128663		0.219517			0.267353					0.294203	1	0.197503		0.236539			0.227351					0.313315
Average
	0.159186		0.250955			0.288668					0.324584		0.212176		0.253227			0.238816					0.335122
St Error
0	0.0268041		0.0263471			0.0275801					0.034347	0	0.0225216		0.0144064			0.00686576					0.0365314
Total												Total	0min		2min			5min					10min
Cav1WT												Cav1KO
	0.159186	x	0.250955	x	x	0.288668	x	x	x	x	0.324584
	0min	1min	2min	3min	4min	5min	6min	7min	8min	9min	10min

## Sheet: Net Recycling Figure 4I
Normalized by each time 0min
1	0.822917		0.895833		0.815972	1	0.855385		0.772308		0.695385
1	0.989041		0.912329		1.07397	1	0.933476		0.815451		0.832618
1	0.905979		0.904081		0.944972	1	0.894431		0.793879		0.764001
Normalized by each time 0min
1	1.33501		1.09824		1.15365	1	0.807971		0.777174		0.878623
1	0.994819		0.875648		0.839378	1	0.895717		0.880819		0.858473
1	1.16492		0.986942		0.996515	1	0.851844		0.828997		0.868548
Normalized by each time 0min
1	0.858896		0.840491		0.892638	1	1.00743		1.0223		0.97026
1	0.731844		0.726257		0.751397	1	0.896774		0.735484		0.729032
1	0.79537		0.783374		0.822017	1	0.952105		0.878894		0.849646
Normalized by each time 0min
1	0.891975		0.950617		0.947531	1	0.860806		0.820513		0.761905
1	0.979112		0.861619		0.908616	1	0.865132		0.845395		0.805921
1	0.935544		0.906118		0.928074	1	0.862969		0.832954		0.783913
Normalized by each time 0min
1	0.902222		0.893333		1.15556	1	0.588235		0.996904		0.724458
1	1.05911		1.01478		1.37931	1	0.67381		0.740476		0.552381
1	0.980668		0.954056		1.26743	1	0.631022		0.86869		0.63842
Average
1	0.956495		0.906914		0.991802	1	0.838474		0.840683		0.780906
St Error
0	0.0518321		0.0317217		0.0615163	0	0.0389313		0.0316026		0.0365902
0min	1min		3min		5min
