# Supplementary material for: Caveolae couple mechanical stress to integrin recycling and activation
Source: eLife. 2022 Oct 20;11:e82348. doi: 10.7554/eLife.82348 (PMC9747151; doi:10.7554/eLife.82348)
Supplement: Figure 5—figure supplement 1—source data 1. [file elife-82348-fig5-figsupp1-data1.xlsx]

## Sheet: Dextran Uptake panel 3A
		Dextran uptake after 3 min
		Cav1WT					Cav1KO
	Cell Number	Area	Mean	Perimeter		Cell Number	Area	Mean	Perimeter
	1	387.32	8.857	69.723		1	544.558	11.489	134.692
	2	752.166	5.478	97.219		2	298.519	12.895	67.215
	3	607.85	4.925	87.399		3	360.825	15.46	152.509
	4	870.321	4.681	104.585		4	809.564	18.248	137.771
	5	472.253	8.942	112.895		5	295.156	21.41	65.252
	6	258.172	15.383	70.077		6	420.587	35.924	78.819
	7	604.983	7.654	180.186		7	325.315	20.744	76.15
	8	443.258	19.251	95.486		8	477.044	18.761	125.969
	9	282.6	7.835	95.495		9	470.661	14.384	106.512
	10	424.034	13.102	98.843		10	1361.17	15.363	274.612
	11	319.778	23.812	70.268		11	610.048	15.603	111.872
	12	290.587	10.349	67.306		12	347.65	9.504	72.854
	13	327.424	11.379	72.768		13	553.401	8.069	101.992
	14	316.48	10.255	72.481		14	624.533	7.023	111.922
	15	863.229	16.14	195.207		15	391.912	22.549	102.506
	16	852.514	5.766	178.593		16	333.995	19.915	80.643
	17	383.802	7.48	74.214		17	725.907	24.239	111.562
	18	792.813	8.919	137.293		18	567.447	11.387	87.587
	19	2386.65	5.553	360.1		19	684.747	23.095	94.974
	20	609.901	5.896	133.324		20	713.205	21.243	146.534
	21	976.234	10.66	185.668		21	690.805	15.953	109.884
	22	730.112	15.776	111.748		22	725.76	18.627	134.718
	23	743.513	16.57	149.164		23	482.195	22.06	113.877
	24	422.608	14.557	107.119		24	858.01	18.339	115.716
	25	516.198	4.89	98.778		25	258.417	24.34	70.823
						26	384.975	27.196	140.09
		Mean fluorescence Average	10.5644			27	724.685	23.895	110.577
		SEM	1.01636			28	1051.96	19.206	126.387
						29	540.455	7.486	88.138
							Mean fluorescence Average	18.083
							SEM	1.19988

## Sheet: WT ML141 panel 3D 3L
Image File	Image Serie	Channels Analyzed (ch1 vs. ch2)	Pearson coeff.	Normalized by Cav1WT Mean Control	M1	M2	ICQ	Ch1 threshold range	Ch2 threshold range
Cav1WT_vs_KO_Endoc_3min+Strip+ML141_10uM-only_before_endocytosis_CD44x3_647_Cav1_546_actBeta1_488.lif	Cav1WT_Endoc_3min_CD44_647_Cav1_546_actBeta1_488+Vero_Settings	Ch_Reference_actBCh_AND_Ch_CavCh	0.183	0.64042	0.32	0.87	0.246	0; 0	0; 0\n
Cav1WT_vs_KO_Endoc_3min+Strip+ML141_10uM-only_before_endocytosis_CD44x3_647_Cav1_546_actBeta1_488.lif	Cav1WT_Endoc_3min_CD44_647_Cav1_546_actBeta1_488+Vero_Settings	Ch_Reference_actBCh_AND_Ch_CD44Ch	0.2	0.89322	0.87	0.633	0.218	0; 0	0; 0\n		Cav1WT Control		Average	SEM
Cav1WT_vs_KO_Endoc_3min+Strip+ML141_10uM-only_before_endocytosis_CD44x3_647_Cav1_546_actBeta1_488.lif	Cav1WT_Endoc_3min_CD44_647_Cav1_546_actBeta1_488+Vero_Settings_2	Ch_Reference_actBCh_AND_Ch_CavCh	0.206	0.72091	0.275	0.849	0.245	0; 0	0; 0\n			ActBeta1 vs Cav1 Control	0.28575	0.0186808
Cav1WT_vs_KO_Endoc_3min+Strip+ML141_10uM-only_before_endocytosis_CD44x3_647_Cav1_546_actBeta1_488.lif	Cav1WT_Endoc_3min_CD44_647_Cav1_546_actBeta1_488+Vero_Settings_2	Ch_Reference_actBCh_AND_Ch_CD44Ch	0.262	1.17012	0.758	0.726	0.3	0; 0	0; 0\n			ActBeta1 vs CD44 Control	0.223909	0.0148266
Cav1WT_vs_KO_Endoc_3min+Strip+ML141_10uM-only_before_endocytosis_CD44x3_647_Cav1_546_actBeta1_488.lif	Cav1WT_Endoc_3min_CD44_647_Cav1_546_actBeta1_488+Vero_Settings_3	Ch_Reference_actBCh_AND_Ch_CavCh	0.226	0.790901	0.219	0.887	0.227	0; 0	0; 0\n
Cav1WT_vs_KO_Endoc_3min+Strip+ML141_10uM-only_before_endocytosis_CD44x3_647_Cav1_546_actBeta1_488.lif	Cav1WT_Endoc_3min_CD44_647_Cav1_546_actBeta1_488+Vero_Settings_3	Ch_Reference_actBCh_AND_Ch_CD44Ch	0.276	1.23264	0.742	0.734	0.31	0; 0	0; 0\n
Cav1WT_vs_KO_Endoc_3min+Strip+ML141_10uM-only_before_endocytosis_CD44x3_647_Cav1_546_actBeta1_488.lif	Cav1WT_Endoc_3min_CD44_647_Cav1_546_actBeta1_488+Vero_Settings_4	Ch_Reference_actBCh_AND_Ch_CavCh	0.296	1.03587	0.246	0.891	0.183	0; 0	0; 0\n
Cav1WT_vs_KO_Endoc_3min+Strip+ML141_10uM-only_before_endocytosis_CD44x3_647_Cav1_546_actBeta1_488.lif	Cav1WT_Endoc_3min_CD44_647_Cav1_546_actBeta1_488+Vero_Settings_4	Ch_Reference_actBCh_AND_Ch_CD44Ch	0.284	1.26837	0.783	0.761	0.266	0; 0	0; 0\n		Cav1WT +ML141		Average	SEM
Cav1WT_vs_KO_Endoc_3min+Strip+ML141_10uM-only_before_endocytosis_CD44x3_647_Cav1_546_actBeta1_488.lif	Cav1WT_Endoc_3min_CD44_647_Cav1_546_actBeta1_488+Vero_Settings_5	Ch_Reference_actBCh_AND_Ch_CavCh	0.229	0.8014	0.272	0.888	0.215	0; 0	0; 0\n			ActBeta1 vs Cav1+ML141	0.273833	0.0146669
Cav1WT_vs_KO_Endoc_3min+Strip+ML141_10uM-only_before_endocytosis_CD44x3_647_Cav1_546_actBeta1_488.lif	Cav1WT_Endoc_3min_CD44_647_Cav1_546_actBeta1_488+Vero_Settings_5	Ch_Reference_actBCh_AND_Ch_CD44Ch	0.242	1.0808	0.681	0.724	0.267	0; 0	0; 0\n			ActBeta1 vs CD44+ML141	0.201867	0.0117552
Cav1WT_vs_KO_Endoc_3min+Strip+ML141_10uM-only_before_endocytosis_CD44x3_647_Cav1_546_actBeta1_488.lif	Cav1WT_Endoc_3min_CD44_647_Cav1_546_actBeta1_488+Vero_Settings_6	Ch_Reference_actBCh_AND_Ch_CavCh	0.188	0.657918	0.458	0.885	0.18	0; 0	0; 0\n
Cav1WT_vs_KO_Endoc_3min+Strip+ML141_10uM-only_before_endocytosis_CD44x3_647_Cav1_546_actBeta1_488.lif	Cav1WT_Endoc_3min_CD44_647_Cav1_546_actBeta1_488+Vero_Settings_6	Ch_Reference_actBCh_AND_Ch_CD44Ch	0.173	0.772635	0.841	0.792	0.261	0; 0	0; 0\n
Cav1WT_vs_KO_Endoc_3min+Strip+ML141_10uM-only_before_endocytosis_CD44x3_647_Cav1_546_actBeta1_488.lif	Cav1WT_Endoc_3min_CD44_647_Cav1_546_actBeta1_488+Vero_Settings_7	Ch_Reference_actBCh_AND_Ch_CavCh	0.182	0.63692	0.455	0.812	0.231	0; 0	0; 0\n
Cav1WT_vs_KO_Endoc_3min+Strip+ML141_10uM-only_before_endocytosis_CD44x3_647_Cav1_546_actBeta1_488.lif	Cav1WT_Endoc_3min_CD44_647_Cav1_546_actBeta1_488+Vero_Settings_7	Ch_Reference_actBCh_AND_Ch_CD44Ch	0.273	1.21924	0.802	0.728	0.258	0; 0	0; 0\n
Cav1WT_vs_KO_Endoc_3min+Strip+ML141_10uM-only_before_endocytosis_CD44x3_647_Cav1_546_actBeta1_488.lif	Cav1WT_Endoc_3min_CD44_647_Cav1_546_actBeta1_488+Vero_Settings_8	Ch_Reference_actBCh_AND_Ch_CavCh	0.254	0.888889	0.338	0.827	0.282	0; 0	0; 0\n
Cav1WT_vs_KO_Endoc_3min+Strip+ML141_10uM-only_before_endocytosis_CD44x3_647_Cav1_546_actBeta1_488.lif	Cav1WT_Endoc_3min_CD44_647_Cav1_546_actBeta1_488+Vero_Settings_8	Ch_Reference_actBCh_AND_Ch_CD44Ch	0.131	0.585059	0.658	0.664	0.314	0; 0	0; 0\n
Cav1WT_vs_KO_Endoc_3min+Strip+ML141_10uM-only_before_endocytosis_CD44x3_647_Cav1_546_actBeta1_488.lif	Cav1WT_Endoc_3min_CD44_647_Cav1_546_actBeta1_488+Vero_Settings_9	Ch_Reference_actBCh_AND_Ch_CavCh	0.172	0.601925	0.319	0.776	0.287	0; 0	0; 0\n
Cav1WT_vs_KO_Endoc_3min+Strip+ML141_10uM-only_before_endocytosis_CD44x3_647_Cav1_546_actBeta1_488.lif	Cav1WT_Endoc_3min_CD44_647_Cav1_546_actBeta1_488+Vero_Settings_9	Ch_Reference_actBCh_AND_Ch_CD44Ch	0.254	1.13439	0.74	0.653	0.285	0; 0	0; 0\n
Cav1WT_vs_KO_Endoc_3min+Strip+ML141_10uM-only_before_endocytosis_CD44x3_647_Cav1_546_actBeta1_488.lif	Cav1WT_Endoc_3min_CD44_647_Cav1_546_actBeta1_488+Vero_Settings_10	Ch_Reference_actBCh_AND_Ch_CavCh	0.044	0.153981	0.325	0.738	0.234	0; 0	0; 0\n
Cav1WT_vs_KO_Endoc_3min+Strip+ML141_10uM-only_before_endocytosis_CD44x3_647_Cav1_546_actBeta1_488.lif	Cav1WT_Endoc_3min_CD44_647_Cav1_546_actBeta1_488+Vero_Settings_10	Ch_Reference_actBCh_AND_Ch_CD44Ch	0.239	1.0674	0.804	0.659	0.273	0; 0	0; 0\n
Cav1WT_vs_KO_Endoc_3min+Strip+ML141_10uM-only_before_endocytosis_CD44x3_647_Cav1_546_actBeta1_488.lif	Cav1WT_Endoc_3min_CD44_647_Cav1_546_actBeta1_488+Vero_Settings_11	Ch_Reference_actBCh_AND_Ch_CavCh	0.259	0.906387	0.426	0.819	0.26	0; 0	0; 0\n
Cav1WT_vs_KO_Endoc_3min+Strip+ML141_10uM-only_before_endocytosis_CD44x3_647_Cav1_546_actBeta1_488.lif	Cav1WT_Endoc_3min_CD44_647_Cav1_546_actBeta1_488+Vero_Settings_11	Ch_Reference_actBCh_AND_Ch_CD44Ch	0.243	1.08526	0.812	0.665	0.273	0; 0	0; 0\n
Cav1WT_vs_KO_Endoc_3min+Strip+ML141_10uM-only_before_endocytosis_CD44x3_647_Cav1_546_actBeta1_488.lif	Cav1WT_Endoc_3min_CD44_647_Cav1_546_actBeta1_488+Vero_Settings_12	Ch_Reference_actBCh_AND_Ch_CavCh	0.108	0.377953	0.541	0.838	0.274	0; 0	0; 0\n
Cav1WT_vs_KO_Endoc_3min+Strip+ML141_10uM-only_before_endocytosis_CD44x3_647_Cav1_546_actBeta1_488.lif	Cav1WT_Endoc_3min_CD44_647_Cav1_546_actBeta1_488+Vero_Settings_12	Ch_Reference_actBCh_AND_Ch_CD44Ch	0.102	0.455542	0.783	0.684	0.283	0; 0	0; 0\n
Cav1WT_vs_KO_Endoc_3min+Strip+ML141_10uM-only_before_endocytosis_CD44x3_647_Cav1_546_actBeta1_488.lif	Cav1WT_Endoc_3min_CD44_647_Cav1_546_actBeta1_488+Vero_Settings_13	Ch_Reference_actBCh_AND_Ch_CavCh	0.191	0.668416	0.378	0.8	0.288	0; 0	0; 0\n
Cav1WT_vs_KO_Endoc_3min+Strip+ML141_10uM-only_before_endocytosis_CD44x3_647_Cav1_546_actBeta1_488.lif	Cav1WT_Endoc_3min_CD44_647_Cav1_546_actBeta1_488+Vero_Settings_13	Ch_Reference_actBCh_AND_Ch_CD44Ch	0.213	0.951279	0.618	0.63	0.324	0; 0	0; 0\n
Cav1WT_vs_KO_Endoc_3min+Strip+ML141_10uM-only_before_endocytosis_CD44x3_647_Cav1_546_actBeta1_488.lif	Cav1WT_Endoc_3min_CD44_647_Cav1_546_actBeta1_488+Vero_Settings_14	Ch_Reference_actBCh_AND_Ch_CavCh	0.139	0.486439	0.752	0.845	0.374	0; 0	0; 0\n
Cav1WT_vs_KO_Endoc_3min+Strip+ML141_10uM-only_before_endocytosis_CD44x3_647_Cav1_546_actBeta1_488.lif	Cav1WT_Endoc_3min_CD44_647_Cav1_546_actBeta1_488+Vero_Settings_14	Ch_Reference_actBCh_AND_Ch_CD44Ch	0.247	1.10313	0.921	0.726	0.311	0; 0	0; 0\n
Cav1WT_vs_KO_Endoc_3min+Strip+ML141_10uM-only_before_endocytosis_CD44x3_647_Cav1_546_actBeta1_488.lif	Cav1WT_Endoc_3min_CD44_647_Cav1_546_actBeta1_488+Vero_Settings_15	Ch_Reference_actBCh_AND_Ch_CavCh	0.2	0.699913	0.41	0.782	0.302	0; 0	0; 0\n
Cav1WT_vs_KO_Endoc_3min+Strip+ML141_10uM-only_before_endocytosis_CD44x3_647_Cav1_546_actBeta1_488.lif	Cav1WT_Endoc_3min_CD44_647_Cav1_546_actBeta1_488+Vero_Settings_15	Ch_Reference_actBCh_AND_Ch_CD44Ch	0.15	0.669915	0.649	0.567	0.278	0; 0	0; 0\n			Normalized by Cav1WT Mean Control
Cav1WT_vs_KO_Endoc_3min+Strip+ML141_10uM_CD44_647_Cav1_546_actBeta1_488.lif	Cav1WT_Endoc_3min_CD44_647_Cav1_546_actBeta1_488	Ch_Reference_actBCh_AND_Ch_CavCh	0.197	0.689414	0.411	0.817	0.135	0; 0	0; 0\n		Cav1WT Control		Average	SEM
Cav1WT_vs_KO_Endoc_3min+Strip+ML141_10uM_CD44_647_Cav1_546_actBeta1_488.lif	Cav1WT_Endoc_3min_CD44_647_Cav1_546_actBeta1_488	Ch_Reference_actBCh_AND_Ch_CD44Ch	0.268	1.19691	0.512	0.736	0.152	0; 0	0; 0\n			ActBeta1 vs Cav1 Control	1	0.0653748
Cav1WT_vs_KO_Endoc_3min+Strip+ML141_10uM_CD44_647_Cav1_546_actBeta1_488.lif	Cav1WT_Endoc_3min_CD44_647_Cav1_546_actBeta1_488_2	Ch_Reference_actBCh_AND_Ch_CavCh	0.366	1.28084	0.288	0.885	0.199	0; 0	0; 0\n			ActBeta1 vs CD44 Control	1	0.066217
Cav1WT_vs_KO_Endoc_3min+Strip+ML141_10uM_CD44_647_Cav1_546_actBeta1_488.lif	Cav1WT_Endoc_3min_CD44_647_Cav1_546_actBeta1_488_2	Ch_Reference_actBCh_AND_Ch_CD44Ch	0.175	0.781567	0.362	0.802	0.209	0; 0	0; 0\n
Cav1WT_vs_KO_Endoc_3min+Strip+ML141_10uM_CD44_647_Cav1_546_actBeta1_488.lif	Cav1WT_Endoc_3min_CD44_647_Cav1_546_actBeta1_488_3	Ch_Reference_actBCh_AND_Ch_CavCh	0.499	1.74628	0.392	0.924	0.184	0; 0	0; 0\n
Cav1WT_vs_KO_Endoc_3min+Strip+ML141_10uM_CD44_647_Cav1_546_actBeta1_488.lif	Cav1WT_Endoc_3min_CD44_647_Cav1_546_actBeta1_488_3	Ch_Reference_actBCh_AND_Ch_CD44Ch	0.23	1.0272	0.429	0.838	0.19	0; 0	0; 0\n			Normalized by Cav1WT Mean Control
Cav1WT_vs_KO_Endoc_3min+Strip+ML141_10uM_CD44_647_Cav1_546_actBeta1_488.lif	Cav1WT_Endoc_3min_CD44_647_Cav1_546_actBeta1_488+Vero_Settings	Ch_Reference_actBCh_AND_Ch_CavCh	0.121	0.423447	0.427	0.822	0.306	0; 0	0; 0\n		Cav1WT +ML141		Average	SEM
Cav1WT_vs_KO_Endoc_3min+Strip+ML141_10uM_CD44_647_Cav1_546_actBeta1_488.lif	Cav1WT_Endoc_3min_CD44_647_Cav1_546_actBeta1_488+Vero_Settings	Ch_Reference_actBCh_AND_Ch_CD44Ch	0.099	0.442144	0.616	0.559	0.327	0; 0	0; 0\n			ActBeta1 vs Cav1 Control	0.958297	0.0423824
Cav1WT_vs_KO_Endoc_3min+Strip+ML141_10uM_CD44_647_Cav1_546_actBeta1_488.lif	Cav1WT_Endoc_3min_CD44_647_Cav1_546_actBeta1_488+Vero_Settings_2	Ch_Reference_actBCh_AND_Ch_CavCh	0.573	2.00525	0.718	0.849	0.366	0; 0	0; 0\n			ActBeta1 vs CD44 Control	0.901556	0.0433505
Cav1WT_vs_KO_Endoc_3min+Strip+ML141_10uM_CD44_647_Cav1_546_actBeta1_488.lif	Cav1WT_Endoc_3min_CD44_647_Cav1_546_actBeta1_488+Vero_Settings_2	Ch_Reference_actBCh_AND_Ch_CD44Ch	-0.011	-0.0491271	0.494	0.449	0.206	0; 0	0; 0\n
Cav1WT_vs_KO_Endoc_3min+Strip+ML141_10uM_CD44_647_Cav1_546_actBeta1_488.lif	Cav1WT_Endoc_3min_CD44_647_Cav1_546_actBeta1_488+Vero_Settings_3	Ch_Reference_actBCh_AND_Ch_CavCh	0.379	1.32633	0.504	0.885	0.301	0; 0	0; 0\n
Cav1WT_vs_KO_Endoc_3min+Strip+ML141_10uM_CD44_647_Cav1_546_actBeta1_488.lif	Cav1WT_Endoc_3min_CD44_647_Cav1_546_actBeta1_488+Vero_Settings_3	Ch_Reference_actBCh_AND_Ch_CD44Ch	0.114	0.509135	0.634	0.558	0.314	0; 0	0; 0\n
Cav1WT_vs_KO_Endoc_3min+Strip+ML141_10uM_CD44_647_Cav1_546_actBeta1_488.lif	Cav1WT_Endoc_3min_CD44_647_Cav1_546_actBeta1_488+Vero_Settings_4	Ch_Reference_actBCh_AND_Ch_CavCh	0.194	0.678915	0.413	0.857	0.315	0; 0	0; 0\n
Cav1WT_vs_KO_Endoc_3min+Strip+ML141_10uM_CD44_647_Cav1_546_actBeta1_488.lif	Cav1WT_Endoc_3min_CD44_647_Cav1_546_actBeta1_488+Vero_Settings_4	Ch_Reference_actBCh_AND_Ch_CD44Ch	0.207	0.924482	0.584	0.548	0.326	0; 0	0; 0\n
Cav1WT_vs_KO_Endoc_3min+Strip+ML141_10uM_CD44_647_Cav1_546_actBeta1_488.lif	Cav1WT_Endoc_3min_CD44_647_Cav1_546_actBeta1_488+Vero_Settings_5	Ch_Reference_actBCh_AND_Ch_CavCh	0.507	1.77428	0.496	0.87	0.272	0; 0	0; 0\n
Cav1WT_vs_KO_Endoc_3min+Strip+ML141_10uM_CD44_647_Cav1_546_actBeta1_488.lif	Cav1WT_Endoc_3min_CD44_647_Cav1_546_actBeta1_488+Vero_Settings_5	Ch_Reference_actBCh_AND_Ch_CD44Ch	0.165	0.736906	0.624	0.571	0.28	0; 0	0; 0\n
Cav1WT_vs_KO_Endoc_3min+Strip+ML141_10uM_CD44_647_Cav1_546_actBeta1_488.lif	Cav1WT_Endoc_3min_CD44_647_Cav1_546_actBeta1_488+Vero_Settings_6	Ch_Reference_actBCh_AND_Ch_CavCh	0.247	0.864392	0.531	0.847	0.27	0; 0	0; 0\n
Cav1WT_vs_KO_Endoc_3min+Strip+ML141_10uM_CD44_647_Cav1_546_actBeta1_488.lif	Cav1WT_Endoc_3min_CD44_647_Cav1_546_actBeta1_488+Vero_Settings_6	Ch_Reference_actBCh_AND_Ch_CD44Ch	0.151	0.674381	0.67	0.614	0.276	0; 0	0; 0\n
Cav1WT_vs_KO_Endoc_3min+Strip+ML141_10uM_CD44_647_Cav1_546_actBeta1_488.lif	Cav1WT_Endoc_3min_CD44_647_Cav1_546_actBeta1_488+Vero_Settings_7	Ch_Reference_actBCh_AND_Ch_CavCh	0.351	1.22835	0.308	0.832	0.362	0; 0	0; 0\n
Cav1WT_vs_KO_Endoc_3min+Strip+ML141_10uM_CD44_647_Cav1_546_actBeta1_488.lif	Cav1WT_Endoc_3min_CD44_647_Cav1_546_actBeta1_488+Vero_Settings_7	Ch_Reference_actBCh_AND_Ch_CD44Ch	0.288	1.28624	0.5	0.615	0.382	0; 0	0; 0\n
Cav1WT_vs_KO_Endoc_3min+Strip+ML141_10uM_CD44_647_Cav1_546_actBeta1_488.lif	Cav1WT_Endoc_3min_CD44_647_Cav1_546_actBeta1_488+Vero_Settings_8	Ch_Reference_actBCh_AND_Ch_CavCh	0.401	1.40332	0.484	0.888	0.279	0; 0	0; 0\n
Cav1WT_vs_KO_Endoc_3min+Strip+ML141_10uM_CD44_647_Cav1_546_actBeta1_488.lif	Cav1WT_Endoc_3min_CD44_647_Cav1_546_actBeta1_488+Vero_Settings_8	Ch_Reference_actBCh_AND_Ch_CD44Ch	0.242	1.0808	0.668	0.756	0.33	0; 0	0; 0\n
Cav1WT_vs_KO_Endoc_3min+Strip+ML141_10uM_CD44_647_Cav1_546_actBeta1_488.lif	Cav1WT_Endoc_3min_CD44_647_Cav1_546_actBeta1_488+Vero_Settings_9	Ch_Reference_actBCh_AND_Ch_CavCh	0.312	1.09186	0.504	0.876	0.265	0; 0	0; 0\n
Cav1WT_vs_KO_Endoc_3min+Strip+ML141_10uM_CD44_647_Cav1_546_actBeta1_488.lif	Cav1WT_Endoc_3min_CD44_647_Cav1_546_actBeta1_488+Vero_Settings_9	Ch_Reference_actBCh_AND_Ch_CD44Ch	0.319	1.42469	0.74	0.779	0.314	0; 0	0; 0\n
Cav1WT_vs_KO_Endoc_3min+Strip+ML141_10uM_CD44_647_Cav1_546_actBeta1_488.lif	Cav1WT_Endoc_3min_CD44_647_Cav1_546_actBeta1_488+Vero_Settings_10	Ch_Reference_actBCh_AND_Ch_CavCh	0.387	1.35433	0.422	0.901	0.271	0; 0	0; 0\n
Cav1WT_vs_KO_Endoc_3min+Strip+ML141_10uM_CD44_647_Cav1_546_actBeta1_488.lif	Cav1WT_Endoc_3min_CD44_647_Cav1_546_actBeta1_488+Vero_Settings_10	Ch_Reference_actBCh_AND_Ch_CD44Ch	0.395	1.76411	0.625	0.8	0.353	0; 0	0; 0\n
Cav1WT_vs_KO_Endoc_3min+Strip+ML141_10uM_CD44_647_Cav1_546_actBeta1_488.lif	Cav1WT_Endoc_3min_CD44_647_Cav1_546_actBeta1_488+Vero_Settings_11	Ch_Reference_actBCh_AND_Ch_CavCh	0.251	0.87839	0.59	0.895	0.237	0; 0	0; 0\n
Cav1WT_vs_KO_Endoc_3min+Strip+ML141_10uM_CD44_647_Cav1_546_actBeta1_488.lif	Cav1WT_Endoc_3min_CD44_647_Cav1_546_actBeta1_488+Vero_Settings_11	Ch_Reference_actBCh_AND_Ch_CD44Ch	0.227	1.0138	0.757	0.794	0.269	0; 0	0; 0\n
Cav1WT_vs_KO_Endoc_3min+Strip+ML141_10uM_CD44_647_Cav1_546_actBeta1_488.lif	Cav1WT_Endoc_3min_CD44_647_Cav1_546_actBeta1_488+Vero_Settings_12	Ch_Reference_actBCh_AND_Ch_CavCh	0.488	1.70779	0.536	0.884	0.263	0; 0	0; 0\n
Cav1WT_vs_KO_Endoc_3min+Strip+ML141_10uM_CD44_647_Cav1_546_actBeta1_488.lif	Cav1WT_Endoc_3min_CD44_647_Cav1_546_actBeta1_488+Vero_Settings_12	Ch_Reference_actBCh_AND_Ch_CD44Ch	0.194	0.866423	0.667	0.771	0.281	0; 0	0; 0\n
Cav1WT_vs_KO_Endoc_3min+Strip+ML141_10uM_CD44_647_Cav1_546_actBeta1_488.lif	Cav1WT_Endoc_3min_CD44_647_Cav1_546_actBeta1_488+Vero_Settings_13	Ch_Reference_actBCh_AND_Ch_CavCh	0.089	0.311461	0.67	0.853	0.349	0; 0	0; 0\n
Cav1WT_vs_KO_Endoc_3min+Strip+ML141_10uM_CD44_647_Cav1_546_actBeta1_488.lif	Cav1WT_Endoc_3min_CD44_647_Cav1_546_actBeta1_488+Vero_Settings_13	Ch_Reference_actBCh_AND_Ch_CD44Ch	0.085	0.379618	0.784	0.72	0.286	0; 0	0; 0\n
Cav1WT_vs_KO_Endoc_3min+Strip+ML141_10uM_CD44_647_Cav1_546_actBeta1_488.lif	Cav1WT_Endoc_3min_CD44_647_Cav1_546_actBeta1_488+Vero_Settings_14	Ch_Reference_actBCh_AND_Ch_CavCh	0.282	0.986877	0.415	0.883	0.258	0; 0	0; 0\n
Cav1WT_vs_KO_Endoc_3min+Strip+ML141_10uM_CD44_647_Cav1_546_actBeta1_488.lif	Cav1WT_Endoc_3min_CD44_647_Cav1_546_actBeta1_488+Vero_Settings_14	Ch_Reference_actBCh_AND_Ch_CD44Ch	0.22	0.982542	0.633	0.76	0.302	0; 0	0; 0\n
Cav1WT_vs_KO_Endoc_3min+Strip+ML141_10uM_CD44_647_Cav1_546_actBeta1_488.lif	Cav1WT_Endoc_3min_CD44_647_Cav1_546_actBeta1_488+Vero_Settings_15	Ch_Reference_actBCh_AND_Ch_CavCh	0.445	1.55731	0.334	0.909	0.286	0; 0	0; 0\n
Cav1WT_vs_KO_Endoc_3min+Strip+ML141_10uM_CD44_647_Cav1_546_actBeta1_488.lif	Cav1WT_Endoc_3min_CD44_647_Cav1_546_actBeta1_488+Vero_Settings_15	Ch_Reference_actBCh_AND_Ch_CD44Ch	0.393	1.75518	0.582	0.794	0.35	0; 0	0; 0\n
Cav1WT_vs_KO_Endoc_3min+Strip_CD44_647_Cav1_546_actBeta1_488.lif	Cav1WT_Endoc_3min_CD44_647_Cav1_546_actBeta1_488	Ch_Reference_actBCh_AND_Ch_CavCh	0.09	0.314961	0.183	0.789	0.206	0; 0	0; 0\n
Cav1WT_vs_KO_Endoc_3min+Strip_CD44_647_Cav1_546_actBeta1_488.lif	Cav1WT_Endoc_3min_CD44_647_Cav1_546_actBeta1_488	Ch_Reference_actBCh_AND_Ch_CD44Ch	-0.1	-0.44661	0.481	0.626	0.128	0; 0	0; 0\n
Cav1WT_vs_KO_Endoc_3min+Strip_CD44_647_Cav1_546_actBeta1_488.lif	Cav1WT_Endoc_3min_CD44_647_Cav1_546_actBeta1_488_2	Ch_Reference_actBCh_AND_Ch_CavCh	0.278	0.972878	0.251	0.926	0.09	0; 0	0; 0\n
Cav1WT_vs_KO_Endoc_3min+Strip_CD44_647_Cav1_546_actBeta1_488.lif	Cav1WT_Endoc_3min_CD44_647_Cav1_546_actBeta1_488_2	Ch_Reference_actBCh_AND_Ch_CD44Ch	0.236	1.054	0.303	0.818	0.118	0; 0	0; 0\n
Cav1WT_vs_KO_Endoc_3min+Strip_CD44_647_Cav1_546_actBeta1_488.lif	Cav1WT_Endoc_3min_CD44_647_Cav1_546_actBeta1_488_3	Ch_Reference_actBCh_AND_Ch_CavCh	0.323	1.13036	0.447	0.922	0.209	0; 0	0; 0\n
Cav1WT_vs_KO_Endoc_3min+Strip_CD44_647_Cav1_546_actBeta1_488.lif	Cav1WT_Endoc_3min_CD44_647_Cav1_546_actBeta1_488_3	Ch_Reference_actBCh_AND_Ch_CD44Ch	0.339	1.51401	0.442	0.888	0.21	0; 0	0; 0\n
Cav1WT_vs_KO_Endoc_3min+Strip_CD44_647_Cav1_546_actBeta1_488.lif	Cav1WT_Endoc_3min_CD44_647_Cav1_546_actBeta1_488_4	Ch_Reference_actBCh_AND_Ch_CavCh	0.429	1.50131	0.531	0.941	0.199	0; 0	0; 0\n
Cav1WT_vs_KO_Endoc_3min+Strip_CD44_647_Cav1_546_actBeta1_488.lif	Cav1WT_Endoc_3min_CD44_647_Cav1_546_actBeta1_488_4	Ch_Reference_actBCh_AND_Ch_CD44Ch	0.39	1.74178	0.512	0.889	0.193	0; 0	0; 0\n
Cav1WT_vs_KO_Endoc_3min+Strip_CD44_647_Cav1_546_actBeta1_488.lif	Cav1WT_Endoc_3min_CD44_647_Cav1_546_actBeta1_488_5	Ch_Reference_actBCh_AND_Ch_CavCh	0.399	1.39633	0.56	0.934	0.21	0; 0	0; 0\n
Cav1WT_vs_KO_Endoc_3min+Strip_CD44_647_Cav1_546_actBeta1_488.lif	Cav1WT_Endoc_3min_CD44_647_Cav1_546_actBeta1_488_5	Ch_Reference_actBCh_AND_Ch_CD44Ch	0.311	1.38896	0.466	0.89	0.178	0; 0	0; 0\n
Cav1WT_vs_KO_Endoc_3min+Strip_CD44_647_Cav1_546_actBeta1_488.lif	Cav1WT_Endoc_3min_CD44_647_Cav1_546_actBeta1_488_6	Ch_Reference_actBCh_AND_Ch_CavCh	0.315	1.10236	0.21	0.927	0.169	0; 0	0; 0\n
Cav1WT_vs_KO_Endoc_3min+Strip_CD44_647_Cav1_546_actBeta1_488.lif	Cav1WT_Endoc_3min_CD44_647_Cav1_546_actBeta1_488_6	Ch_Reference_actBCh_AND_Ch_CD44Ch	0.28	1.25051	0.226	0.843	0.174	0; 0	0; 0\n
Cav1WT_vs_KO_Endoc_3min+Strip_CD44_647_Cav1_546_actBeta1_488.lif	Cav1WT_Endoc_3min_CD44_647_Cav1_546_actBeta1_488_7	Ch_Reference_actBCh_AND_Ch_CavCh	0.333	1.16535	0.328	0.928	0.172	0; 0	0; 0\n
Cav1WT_vs_KO_Endoc_3min+Strip_CD44_647_Cav1_546_actBeta1_488.lif	Cav1WT_Endoc_3min_CD44_647_Cav1_546_actBeta1_488_7	Ch_Reference_actBCh_AND_Ch_CD44Ch	0.17	0.759237	0.235	0.82	0.146	0; 0	0; 0\n
Cav1WT_vs_KO_Endoc_3min+Strip_CD44_647_Cav1_546_actBeta1_488.lif	Cav1WT_Endoc_3min_CD44_647_Cav1_546_actBeta1_488_8	Ch_Reference_actBCh_AND_Ch_CavCh	0.408	1.42782	0.622	0.954	0.272	0; 0	0; 0\n
Cav1WT_vs_KO_Endoc_3min+Strip_CD44_647_Cav1_546_actBeta1_488.lif	Cav1WT_Endoc_3min_CD44_647_Cav1_546_actBeta1_488_8	Ch_Reference_actBCh_AND_Ch_CD44Ch	0.309	1.38002	0.585	0.892	0.248	0; 0	0; 0\n
Cav1WT_vs_KO_Endoc_3min+Strip_CD44_647_Cav1_546_actBeta1_488.lif	Cav1WT_Endoc_3min_CD44_647_Cav1_546_actBeta1_488_9	Ch_Reference_actBCh_AND_Ch_CavCh	0.335	1.17235	0.33	0.931	0.146	0; 0	0; 0\n
Cav1WT_vs_KO_Endoc_3min+Strip_CD44_647_Cav1_546_actBeta1_488.lif	Cav1WT_Endoc_3min_CD44_647_Cav1_546_actBeta1_488_9	Ch_Reference_actBCh_AND_Ch_CD44Ch	0.24	1.07186	0.364	0.834	0.151	0; 0	0; 0\n
Cav1WT_vs_KO_Endoc_3min+Strip_CD44_647_Cav1_546_actBeta1_488.lif	Cav1WT_Endoc_3min_CD44_647_Cav1_546_actBeta1_488_10	Ch_Reference_actBCh_AND_Ch_CavCh	0.334	1.16885	0.479	0.944	0.193	0; 0	0; 0\n
Cav1WT_vs_KO_Endoc_3min+Strip_CD44_647_Cav1_546_actBeta1_488.lif	Cav1WT_Endoc_3min_CD44_647_Cav1_546_actBeta1_488_10	Ch_Reference_actBCh_AND_Ch_CD44Ch	0.304	1.35769	0.524	0.84	0.211	0; 0	0; 0\n
Cav1WT_vs_KO_Endoc_3min+Strip_CD44_647_Cav1_546_actBeta1_488.lif	Cav1WT_Endoc_3min_CD44_647_Cav1_546_actBeta1_488_11	Ch_Reference_actBCh_AND_Ch_CavCh	0.363	1.27034	0.555	0.963	0.289	0; 0	0; 0\n
Cav1WT_vs_KO_Endoc_3min+Strip_CD44_647_Cav1_546_actBeta1_488.lif	Cav1WT_Endoc_3min_CD44_647_Cav1_546_actBeta1_488_11	Ch_Reference_actBCh_AND_Ch_CD44Ch	0.323	1.44255	0.633	0.897	0.315	0; 0	0; 0\n
Cav1WT_vs_KO_Endoc_3min+Strip+ML141_10uM-only_before_endocytosis_CD44x3_647_Cav1_546_actBeta1_488.lif	Cav1WT+ML141_Endoc_3min_CD44_647_Cav1_546_actBeta1_488+Vero_Settings	Ch_Reference_actBCh_AND_Ch_CavCh	0.276	0.965879	0.558	0.805	0.301	0; 0	0; 0\n
Cav1WT_vs_KO_Endoc_3min+Strip+ML141_10uM-only_before_endocytosis_CD44x3_647_Cav1_546_actBeta1_488.lif	Cav1WT+ML141_Endoc_3min_CD44_647_Cav1_546_actBeta1_488+Vero_Settings	Ch_Reference_actBCh_AND_Ch_CD44Ch	0.23	1.0272	0.652	0.707	0.294	0; 0	0; 0\n
Cav1WT_vs_KO_Endoc_3min+Strip+ML141_10uM-only_before_endocytosis_CD44x3_647_Cav1_546_actBeta1_488.lif	Cav1WT+ML141_Endoc_3min_CD44_647_Cav1_546_actBeta1_488+Vero_Settings_2	Ch_Reference_actBCh_AND_Ch_CavCh	0.199	0.696413	0.397	0.754	0.323	0; 0	0; 0\n
Cav1WT_vs_KO_Endoc_3min+Strip+ML141_10uM-only_before_endocytosis_CD44x3_647_Cav1_546_actBeta1_488.lif	Cav1WT+ML141_Endoc_3min_CD44_647_Cav1_546_actBeta1_488+Vero_Settings_2	Ch_Reference_actBCh_AND_Ch_CD44Ch	0.152	0.678847	0.539	0.624	0.328	0; 0	0; 0\n
Cav1WT_vs_KO_Endoc_3min+Strip+ML141_10uM-only_before_endocytosis_CD44x3_647_Cav1_546_actBeta1_488.lif	Cav1WT+ML141_Endoc_3min_CD44_647_Cav1_546_actBeta1_488+Vero_Settings_3	Ch_Reference_actBCh_AND_Ch_CavCh	0.265	0.927384	0.643	0.784	0.271	0; 0	0; 0\n
Cav1WT_vs_KO_Endoc_3min+Strip+ML141_10uM-only_before_endocytosis_CD44x3_647_Cav1_546_actBeta1_488.lif	Cav1WT+ML141_Endoc_3min_CD44_647_Cav1_546_actBeta1_488+Vero_Settings_3	Ch_Reference_actBCh_AND_Ch_CD44Ch	0.245	1.09419	0.745	0.712	0.252	0; 0	0; 0\n
Cav1WT_vs_KO_Endoc_3min+Strip+ML141_10uM-only_before_endocytosis_CD44x3_647_Cav1_546_actBeta1_488.lif	Cav1WT+ML141_Endoc_3min_CD44_647_Cav1_546_actBeta1_488+Vero_Settings_4	Ch_Reference_actBCh_AND_Ch_CavCh	0.261	0.913386	0.413	0.814	0.306	0; 0	0; 0\n
Cav1WT_vs_KO_Endoc_3min+Strip+ML141_10uM-only_before_endocytosis_CD44x3_647_Cav1_546_actBeta1_488.lif	Cav1WT+ML141_Endoc_3min_CD44_647_Cav1_546_actBeta1_488+Vero_Settings_4	Ch_Reference_actBCh_AND_Ch_CD44Ch	0.192	0.857491	0.511	0.676	0.321	0; 0	0; 0\n
Cav1WT_vs_KO_Endoc_3min+Strip+ML141_10uM-only_before_endocytosis_CD44x3_647_Cav1_546_actBeta1_488.lif	Cav1WT+ML141_Endoc_3min_CD44_647_Cav1_546_actBeta1_488+Vero_Settings_5	Ch_Reference_actBCh_AND_Ch_CavCh	0.297	1.03937	0.535	0.829	0.318	0; 0	0; 0\n
Cav1WT_vs_KO_Endoc_3min+Strip+ML141_10uM-only_before_endocytosis_CD44x3_647_Cav1_546_actBeta1_488.lif	Cav1WT+ML141_Endoc_3min_CD44_647_Cav1_546_actBeta1_488+Vero_Settings_5	Ch_Reference_actBCh_AND_Ch_CD44Ch	0.235	1.04953	0.682	0.718	0.347	0; 0	0; 0\n
Cav1WT_vs_KO_Endoc_3min+Strip+ML141_10uM-only_before_endocytosis_CD44x3_647_Cav1_546_actBeta1_488.lif	Cav1WT+ML141_Endoc_3min_CD44_647_Cav1_546_actBeta1_488+Vero_Settings_6	Ch_Reference_actBCh_AND_Ch_CavCh	0.28	0.979878	0.517	0.846	0.301	0; 0	0; 0\n
Cav1WT_vs_KO_Endoc_3min+Strip+ML141_10uM-only_before_endocytosis_CD44x3_647_Cav1_546_actBeta1_488.lif	Cav1WT+ML141_Endoc_3min_CD44_647_Cav1_546_actBeta1_488+Vero_Settings_6	Ch_Reference_actBCh_AND_Ch_CD44Ch	0.205	0.91555	0.69	0.713	0.319	0; 0	0; 0\n
Cav1WT_vs_KO_Endoc_3min+Strip+ML141_10uM-only_before_endocytosis_CD44x3_647_Cav1_546_actBeta1_488.lif	Cav1WT+ML141_Endoc_3min_CD44_647_Cav1_546_actBeta1_488+Vero_Settings_7	Ch_Reference_actBCh_AND_Ch_CavCh	0.282	0.986877	0.425	0.844	0.324	0; 0	0; 0\n
Cav1WT_vs_KO_Endoc_3min+Strip+ML141_10uM-only_before_endocytosis_CD44x3_647_Cav1_546_actBeta1_488.lif	Cav1WT+ML141_Endoc_3min_CD44_647_Cav1_546_actBeta1_488+Vero_Settings_7	Ch_Reference_actBCh_AND_Ch_CD44Ch	0.17	0.759237	0.588	0.654	0.361	0; 0	0; 0\n
Cav1WT_vs_KO_Endoc_3min+Strip+ML141_10uM-only_before_endocytosis_CD44x3_647_Cav1_546_actBeta1_488.lif	Cav1WT+ML141_Endoc_3min_CD44_647_Cav1_546_actBeta1_488+Vero_Settings_8	Ch_Reference_actBCh_AND_Ch_CavCh	0.179	0.626422	0.432	0.831	0.282	0; 0	0; 0\n
Cav1WT_vs_KO_Endoc_3min+Strip+ML141_10uM-only_before_endocytosis_CD44x3_647_Cav1_546_actBeta1_488.lif	Cav1WT+ML141_Endoc_3min_CD44_647_Cav1_546_actBeta1_488+Vero_Settings_8	Ch_Reference_actBCh_AND_Ch_CD44Ch	0.272	1.21478	0.696	0.715	0.349	0; 0	0; 0\n
Cav1WT_vs_KO_Endoc_3min+Strip+ML141_10uM-only_before_endocytosis_CD44x3_647_Cav1_546_actBeta1_488.lif	Cav1WT+ML141_Endoc_3min_CD44_647_Cav1_546_actBeta1_488+Vero_Settings_9	Ch_Reference_actBCh_AND_Ch_CavCh	0.351	1.22835	0.541	0.861	0.294	0; 0	0; 0\n
Cav1WT_vs_KO_Endoc_3min+Strip+ML141_10uM-only_before_endocytosis_CD44x3_647_Cav1_546_actBeta1_488.lif	Cav1WT+ML141_Endoc_3min_CD44_647_Cav1_546_actBeta1_488+Vero_Settings_9	Ch_Reference_actBCh_AND_Ch_CD44Ch	0.264	1.17905	0.669	0.729	0.326	0; 0	0; 0\n
Cav1WT_vs_KO_Endoc_3min+Strip+ML141_10uM-only_before_endocytosis_CD44x3_647_Cav1_546_actBeta1_488.lif	Cav1WT+ML141_Endoc_3min_CD44_647_Cav1_546_actBeta1_488+Vero_Settings_10	Ch_Reference_actBCh_AND_Ch_CavCh	0.274	0.95888	0.679	0.864	0.23	0; 0	0; 0\n
Cav1WT_vs_KO_Endoc_3min+Strip+ML141_10uM-only_before_endocytosis_CD44x3_647_Cav1_546_actBeta1_488.lif	Cav1WT+ML141_Endoc_3min_CD44_647_Cav1_546_actBeta1_488+Vero_Settings_10	Ch_Reference_actBCh_AND_Ch_CD44Ch	0.251	1.12099	0.769	0.781	0.275	0; 0	0; 0\n
Cav1WT_vs_KO_Endoc_3min+Strip+ML141_10uM-only_before_endocytosis_CD44x3_647_Cav1_546_actBeta1_488.lif	Cav1WT+ML141_Endoc_3min_CD44_647_Cav1_546_actBeta1_488+Vero_Settings_11	Ch_Reference_actBCh_AND_Ch_CavCh	0.29	1.01487	0.728	0.861	0.239	0; 0	0; 0\n
Cav1WT_vs_KO_Endoc_3min+Strip+ML141_10uM-only_before_endocytosis_CD44x3_647_Cav1_546_actBeta1_488.lif	Cav1WT+ML141_Endoc_3min_CD44_647_Cav1_546_actBeta1_488+Vero_Settings_11	Ch_Reference_actBCh_AND_Ch_CD44Ch	0.353	1.57653	0.864	0.809	0.288	0; 0	0; 0\n
Cav1WT_vs_KO_Endoc_3min+Strip+ML141_10uM-only_before_endocytosis_CD44x3_647_Cav1_546_actBeta1_488.lif	Cav1WT+ML141_Endoc_3min_CD44_647_Cav1_546_actBeta1_488+Vero_Settings_12	Ch_Reference_actBCh_AND_Ch_CavCh	0.218	0.762905	0.54	0.797	0.306	0; 0	0; 0\n
Cav1WT_vs_KO_Endoc_3min+Strip+ML141_10uM-only_before_endocytosis_CD44x3_647_Cav1_546_actBeta1_488.lif	Cav1WT+ML141_Endoc_3min_CD44_647_Cav1_546_actBeta1_488+Vero_Settings_12	Ch_Reference_actBCh_AND_Ch_CD44Ch	0.297	1.32643	0.7	0.711	0.332	0; 0	0; 0\n
Cav1WT_vs_KO_Endoc_3min+Strip+ML141_10uM-only_before_endocytosis_CD44x3_647_Cav1_546_actBeta1_488.lif	Cav1WT+ML141_Endoc_3min_CD44_647_Cav1_546_actBeta1_488+Vero_Settings_13	Ch_Reference_actBCh_AND_Ch_CavCh	0.151	0.528434	0.556	0.858	0.271	0; 0	0; 0\n
Cav1WT_vs_KO_Endoc_3min+Strip+ML141_10uM-only_before_endocytosis_CD44x3_647_Cav1_546_actBeta1_488.lif	Cav1WT+ML141_Endoc_3min_CD44_647_Cav1_546_actBeta1_488+Vero_Settings_13	Ch_Reference_actBCh_AND_Ch_CD44Ch	0.209	0.933415	0.719	0.76	0.334	0; 0	0; 0\n
Cav1WT_vs_KO_Endoc_3min+Strip+ML141_10uM-only_before_endocytosis_CD44x3_647_Cav1_546_actBeta1_488.lif	Cav1WT+ML141_Endoc_3min_CD44_647_Cav1_546_actBeta1_488+Vero_Settings_14	Ch_Reference_actBCh_AND_Ch_CavCh	0.253	0.885389	0.487	0.858	0.292	0; 0	0; 0\n
Cav1WT_vs_KO_Endoc_3min+Strip+ML141_10uM-only_before_endocytosis_CD44x3_647_Cav1_546_actBeta1_488.lif	Cav1WT+ML141_Endoc_3min_CD44_647_Cav1_546_actBeta1_488+Vero_Settings_14	Ch_Reference_actBCh_AND_Ch_CD44Ch	0.278	1.24158	0.702	0.719	0.351	0; 0	0; 0\n
Cav1WT_vs_KO_Endoc_3min+Strip+ML141_10uM-only_before_endocytosis_CD44x3_647_Cav1_546_actBeta1_488.lif	Cav1WT+ML141_Endoc_3min_CD44_647_Cav1_546_actBeta1_488+Vero_Settings_15	Ch_Reference_actBCh_AND_Ch_CavCh	0.21	0.734908	0.575	0.873	0.292	0; 0	0; 0\n
Cav1WT_vs_KO_Endoc_3min+Strip+ML141_10uM-only_before_endocytosis_CD44x3_647_Cav1_546_actBeta1_488.lif	Cav1WT+ML141_Endoc_3min_CD44_647_Cav1_546_actBeta1_488+Vero_Settings_15	Ch_Reference_actBCh_AND_Ch_CD44Ch	0.117	0.522533	0.704	0.75	0.333	0; 0	0; 0\n
Cav1WT_vs_KO_Endoc_3min+Strip+ML141_10uM_CD44_647_Cav1_546_actBeta1_488.lif	Cav1WT_Endoc_3min+ML141_10uM_CD44_647_Cav1_546_actBeta1_488+Vero_Settings	Ch_Reference_actBCh_AND_Ch_CavCh	0.268	0.937883	0.414	0.799	0.321	0; 0	0; 0\n
Cav1WT_vs_KO_Endoc_3min+Strip+ML141_10uM_CD44_647_Cav1_546_actBeta1_488.lif	Cav1WT_Endoc_3min+ML141_10uM_CD44_647_Cav1_546_actBeta1_488+Vero_Settings	Ch_Reference_actBCh_AND_Ch_CD44Ch	0.107	0.477873	0.613	0.48	0.275	0; 0	0; 0\n
Cav1WT_vs_KO_Endoc_3min+Strip+ML141_10uM_CD44_647_Cav1_546_actBeta1_488.lif	Cav1WT_Endoc_3min+ML141_10uM_CD44_647_Cav1_546_actBeta1_488+Vero_Settings_2	Ch_Reference_actBCh_AND_Ch_CavCh	0.077	0.269466	0.578	0.872	0.287	0; 0	0; 0\n
Cav1WT_vs_KO_Endoc_3min+Strip+ML141_10uM_CD44_647_Cav1_546_actBeta1_488.lif	Cav1WT_Endoc_3min+ML141_10uM_CD44_647_Cav1_546_actBeta1_488+Vero_Settings_2	Ch_Reference_actBCh_AND_Ch_CD44Ch	0.117	0.522533	0.71	0.571	0.292	0; 0	0; 0\n
Cav1WT_vs_KO_Endoc_3min+Strip+ML141_10uM_CD44_647_Cav1_546_actBeta1_488.lif	Cav1WT_Endoc_3min+ML141_10uM_CD44_647_Cav1_546_actBeta1_488+Vero_Settings_3	Ch_Reference_actBCh_AND_Ch_CavCh	0.454	1.5888	0.541	0.859	0.303	0; 0	0; 0\n
Cav1WT_vs_KO_Endoc_3min+Strip+ML141_10uM_CD44_647_Cav1_546_actBeta1_488.lif	Cav1WT_Endoc_3min+ML141_10uM_CD44_647_Cav1_546_actBeta1_488+Vero_Settings_3	Ch_Reference_actBCh_AND_Ch_CD44Ch	0.148	0.660983	0.68	0.54	0.257	0; 0	0; 0\n
Cav1WT_vs_KO_Endoc_3min+Strip+ML141_10uM_CD44_647_Cav1_546_actBeta1_488.lif	Cav1WT_Endoc_3min+ML141_10uM_CD44_647_Cav1_546_actBeta1_488+Vero_Settings_4	Ch_Reference_actBCh_AND_Ch_CavCh	0.346	1.21085	0.445	0.855	0.307	0; 0	0; 0\n
Cav1WT_vs_KO_Endoc_3min+Strip+ML141_10uM_CD44_647_Cav1_546_actBeta1_488.lif	Cav1WT_Endoc_3min+ML141_10uM_CD44_647_Cav1_546_actBeta1_488+Vero_Settings_4	Ch_Reference_actBCh_AND_Ch_CD44Ch	0.146	0.65205	0.623	0.557	0.292	0; 0	0; 0\n
Cav1WT_vs_KO_Endoc_3min+Strip+ML141_10uM_CD44_647_Cav1_546_actBeta1_488.lif	Cav1WT_Endoc_3min+ML141_10uM_CD44_647_Cav1_546_actBeta1_488+Vero_Settings_5	Ch_Reference_actBCh_AND_Ch_CavCh	0.19	0.664917	0.543	0.857	0.257	0; 0	0; 0\n
Cav1WT_vs_KO_Endoc_3min+Strip+ML141_10uM_CD44_647_Cav1_546_actBeta1_488.lif	Cav1WT_Endoc_3min+ML141_10uM_CD44_647_Cav1_546_actBeta1_488+Vero_Settings_5	Ch_Reference_actBCh_AND_Ch_CD44Ch	0.152	0.678847	0.71	0.667	0.263	0; 0	0; 0\n
Cav1WT_vs_KO_Endoc_3min+Strip+ML141_10uM_CD44_647_Cav1_546_actBeta1_488.lif	Cav1WT_Endoc_3min+ML141_10uM_CD44_647_Cav1_546_actBeta1_488+Vero_Settings_6	Ch_Reference_actBCh_AND_Ch_CavCh	0.355	1.24234	0.539	0.851	0.281	0; 0	0; 0\n
Cav1WT_vs_KO_Endoc_3min+Strip+ML141_10uM_CD44_647_Cav1_546_actBeta1_488.lif	Cav1WT_Endoc_3min+ML141_10uM_CD44_647_Cav1_546_actBeta1_488+Vero_Settings_6	Ch_Reference_actBCh_AND_Ch_CD44Ch	0.188	0.839626	0.681	0.602	0.264	0; 0	0; 0\n
Cav1WT_vs_KO_Endoc_3min+Strip+ML141_10uM_CD44_647_Cav1_546_actBeta1_488.lif	Cav1WT_Endoc_3min+ML141_10uM_CD44_647_Cav1_546_actBeta1_488+Vero_Settings_7	Ch_Reference_actBCh_AND_Ch_CavCh	0.476	1.66579	0.521	0.892	0.297	0; 0	0; 0\n
Cav1WT_vs_KO_Endoc_3min+Strip+ML141_10uM_CD44_647_Cav1_546_actBeta1_488.lif	Cav1WT_Endoc_3min+ML141_10uM_CD44_647_Cav1_546_actBeta1_488+Vero_Settings_7	Ch_Reference_actBCh_AND_Ch_CD44Ch	0.307	1.37109	0.642	0.614	0.293	0; 0	0; 0\n
Cav1WT_vs_KO_Endoc_3min+Strip+ML141_10uM_CD44_647_Cav1_546_actBeta1_488.lif	Cav1WT_Endoc_3min+ML141_10uM_CD44_647_Cav1_546_actBeta1_488+Vero_Settings_8	Ch_Reference_actBCh_AND_Ch_CavCh	0.274	0.95888	0.369	0.844	0.317	0; 0	0; 0\n
Cav1WT_vs_KO_Endoc_3min+Strip+ML141_10uM_CD44_647_Cav1_546_actBeta1_488.lif	Cav1WT_Endoc_3min+ML141_10uM_CD44_647_Cav1_546_actBeta1_488+Vero_Settings_8	Ch_Reference_actBCh_AND_Ch_CD44Ch	0.153	0.683313	0.557	0.513	0.28	0; 0	0; 0\n
Cav1WT_vs_KO_Endoc_3min+Strip+ML141_10uM_CD44_647_Cav1_546_actBeta1_488.lif	Cav1WT_Endoc_3min+ML141_10uM_CD44_647_Cav1_546_actBeta1_488+Vero_Settings_9	Ch_Reference_actBCh_AND_Ch_CavCh	0.273	0.955381	0.557	0.862	0.254	0; 0	0; 0\n
Cav1WT_vs_KO_Endoc_3min+Strip+ML141_10uM_CD44_647_Cav1_546_actBeta1_488.lif	Cav1WT_Endoc_3min+ML141_10uM_CD44_647_Cav1_546_actBeta1_488+Vero_Settings_9	Ch_Reference_actBCh_AND_Ch_CD44Ch	0.2	0.89322	0.713	0.681	0.259	0; 0	0; 0\n
Cav1WT_vs_KO_Endoc_3min+Strip+ML141_10uM_CD44_647_Cav1_546_actBeta1_488.lif	Cav1WT_Endoc_3min+ML141_10uM_CD44_647_Cav1_546_actBeta1_488+Vero_Settings_10	Ch_Reference_actBCh_AND_Ch_CavCh	0.27	0.944882	0.437	0.871	0.32	0; 0	0; 0\n
Cav1WT_vs_KO_Endoc_3min+Strip+ML141_10uM_CD44_647_Cav1_546_actBeta1_488.lif	Cav1WT_Endoc_3min+ML141_10uM_CD44_647_Cav1_546_actBeta1_488+Vero_Settings_10	Ch_Reference_actBCh_AND_Ch_CD44Ch	0.159	0.71011	0.618	0.564	0.31	0; 0	0; 0\n
Cav1WT_vs_KO_Endoc_3min+Strip+ML141_10uM_CD44_647_Cav1_546_actBeta1_488.lif	Cav1WT_Endoc_3min+ML141_10uM_CD44_647_Cav1_546_actBeta1_488+Vero_Settings_11	Ch_Reference_actBCh_AND_Ch_CavCh	0.318	1.11286	0.595	0.839	0.267	0; 0	0; 0\n
Cav1WT_vs_KO_Endoc_3min+Strip+ML141_10uM_CD44_647_Cav1_546_actBeta1_488.lif	Cav1WT_Endoc_3min+ML141_10uM_CD44_647_Cav1_546_actBeta1_488+Vero_Settings_11	Ch_Reference_actBCh_AND_Ch_CD44Ch	0.134	0.598457	0.752	0.575	0.229	0; 0	0; 0\n
Cav1WT_vs_KO_Endoc_3min+Strip+ML141_10uM_CD44_647_Cav1_546_actBeta1_488.lif	Cav1WT_Endoc_3min+ML141_10uM_CD44_647_Cav1_546_actBeta1_488+Vero_Settings_12	Ch_Reference_actBCh_AND_Ch_CavCh	0.356	1.24584	0.601	0.884	0.262	0; 0	0; 0\n
Cav1WT_vs_KO_Endoc_3min+Strip+ML141_10uM_CD44_647_Cav1_546_actBeta1_488.lif	Cav1WT_Endoc_3min+ML141_10uM_CD44_647_Cav1_546_actBeta1_488+Vero_Settings_12	Ch_Reference_actBCh_AND_Ch_CD44Ch	0.282	1.25944	0.73	0.704	0.265	0; 0	0; 0\n
Cav1WT_vs_KO_Endoc_3min+Strip+ML141_10uM_CD44_647_Cav1_546_actBeta1_488.lif	Cav1WT_Endoc_3min+ML141_10uM_CD44_647_Cav1_546_actBeta1_488+Vero_Settings_13	Ch_Reference_actBCh_AND_Ch_CavCh	0.295	1.03237	0.283	0.837	0.336	0; 0	0; 0\n
Cav1WT_vs_KO_Endoc_3min+Strip+ML141_10uM_CD44_647_Cav1_546_actBeta1_488.lif	Cav1WT_Endoc_3min+ML141_10uM_CD44_647_Cav1_546_actBeta1_488+Vero_Settings_13	Ch_Reference_actBCh_AND_Ch_CD44Ch	0.136	0.607389	0.493	0.481	0.309	0; 0	0; 0\n
Cav1WT_vs_KO_Endoc_3min+Strip+ML141_10uM_CD44_647_Cav1_546_actBeta1_488.lif	Cav1WT_Endoc_3min+ML141_10uM_CD44_647_Cav1_546_actBeta1_488+Vero_Settings_14	Ch_Reference_actBCh_AND_Ch_CavCh	0.247	0.864392	0.323	0.849	0.313	0; 0	0; 0\n
Cav1WT_vs_KO_Endoc_3min+Strip+ML141_10uM_CD44_647_Cav1_546_actBeta1_488.lif	Cav1WT_Endoc_3min+ML141_10uM_CD44_647_Cav1_546_actBeta1_488+Vero_Settings_14	Ch_Reference_actBCh_AND_Ch_CD44Ch	0.185	0.826228	0.553	0.547	0.331	0; 0	0; 0\n
Cav1WT_vs_KO_Endoc_3min+Strip+ML141_10uM_CD44_647_Cav1_546_actBeta1_488.lif	Cav1WT_Endoc_3min+ML141_10uM_CD44_647_Cav1_546_actBeta1_488+Vero_Settings_15	Ch_Reference_actBCh_AND_Ch_CavCh	0.23	0.804899	0.483	0.853	0.278	0; 0	0; 0\n
Cav1WT_vs_KO_Endoc_3min+Strip+ML141_10uM_CD44_647_Cav1_546_actBeta1_488.lif	Cav1WT_Endoc_3min+ML141_10uM_CD44_647_Cav1_546_actBeta1_488+Vero_Settings_15	Ch_Reference_actBCh_AND_Ch_CD44Ch	0.172	0.768169	0.661	0.608	0.29	0; 0	0; 0\n

## Sheet: WT Genis. panel 3D
Image File	Image Serie	Channels Analyzed (ch1 vs. ch2)	Pearson coeff.	Normalized by Cav1WT Mean Control	M1	M2	ICQ	Ch1 threshold range	Ch2 threshold range
Cav1WT_Endoc_3min+Strip+Genistein_400ul-L_2h_Cav1_546_actBeta1_488_.lif	Cav1WT_Endoc_3min_Cav1_546_actBeta1_488+Vero_Settings	Ch_Reference_actBCh_AND_Ch_CavCh	0.171	0.669538	0.298	0.705	0.271	0; 0	0; 0\n
Cav1WT_Endoc_3min+Strip+Genistein_400ul-L_2h_Cav1_546_actBeta1_488_.lif	Cav1WT_Endoc_3min_Cav1_546_actBeta1_488+Vero_Settings_2	Ch_Reference_actBCh_AND_Ch_CavCh	0.119	0.465936	0.322	0.729	0.228	0; 0	0; 0\n					Average	SEM
Cav1WT_Endoc_3min+Strip+Genistein_400ul-L_2h_Cav1_546_actBeta1_488_.lif	Cav1WT_Endoc_3min_Cav1_546_actBeta1_488+Vero_Settings_3	Ch_Reference_actBCh_AND_Ch_CavCh	0.118	0.46202	0.308	0.738	0.285	0; 0	0; 0\n			Cav1WT Control	ActBeta1 vs Cav1	0.2554	0.0279011
Cav1WT_Endoc_3min+Strip+Genistein_400ul-L_2h_Cav1_546_actBeta1_488_.lif	Cav1WT_Endoc_3min_Cav1_546_actBeta1_488+Vero_Settings_4	Ch_Reference_actBCh_AND_Ch_CavCh	0.303	1.18637	0.345	0.839	0.269	0; 0	0; 0\n			Cav1WT + Genistein	ActBeta1 vs Cav1	0.130933	0.0202173
Cav1WT_Endoc_3min+Strip+Genistein_400ul-L_2h_Cav1_546_actBeta1_488_.lif	Cav1WT_Endoc_3min_Cav1_546_actBeta1_488+Vero_Settings_5	Ch_Reference_actBCh_AND_Ch_CavCh	0.313	1.22553	0.466	0.855	0.234	0; 0	0; 0\n
Cav1WT_Endoc_3min+Strip+Genistein_400ul-L_2h_Cav1_546_actBeta1_488_.lif	Cav1WT_Endoc_3min_Cav1_546_actBeta1_488+Vero_Settings_6	Ch_Reference_actBCh_AND_Ch_CavCh	0.348	1.36257	0.253	0.87	0.289	0; 0	0; 0\n
Cav1WT_Endoc_3min+Strip+Genistein_400ul-L_2h_Cav1_546_actBeta1_488_.lif	Cav1WT_Endoc_3min_Cav1_546_actBeta1_488+Vero_Settings_7	Ch_Reference_actBCh_AND_Ch_CavCh	0.24	0.939702	0.249	0.844	0.267	0; 0	0; 0\n
Cav1WT_Endoc_3min+Strip+Genistein_400ul-L_2h_Cav1_546_actBeta1_488_.lif	Cav1WT_Endoc_3min_Cav1_546_actBeta1_488+Vero_Settings__8	Ch_Reference_actBCh_AND_Ch_CavCh	0.336	1.31558	0.494	0.902	0.226	0; 0	0; 0\n				Normalized by Cav1WT CONTROL
Cav1WT_Endoc_3min+Strip+Genistein_400ul-L_2h_Cav1_546_actBeta1_488_.lif	Cav1WT_Endoc_3min_Cav1_546_actBeta1_488+Vero_Settings_9	Ch_Reference_actBCh_AND_Ch_CavCh	0.299	1.17071	0.293	0.848	0.257	0; 0	0; 0\n					Average	SEM
Cav1WT_Endoc_3min+Strip+Genistein_400ul-L_2h_Cav1_546_actBeta1_488_.lif	Cav1WT_Endoc_3min_Cav1_546_actBeta1_488+Vero_Settings_10	Ch_Reference_actBCh_AND_Ch_CavCh	0.307	1.20204	0.31	0.868	0.27	0; 0	0; 0\n			Cav1WT Control	ActBeta1 vs Cav1	1	0.109245
Cav1WT_Endoc_3min+Strip+Genistein_400ul-L_2h_Cav1_546_actBeta1_488_.lif	Cav1WT_Endoc_3min+Genistein_Cav1_546_actBeta1_488+Vero_Settings	Ch_Reference_actBCh_AND_Ch_CavCh	0.149	0.583399	0.165	0.793	0.331	0; 0	0; 0\n			Cav1WT + Genistein	ActBeta1 vs Cav1	0.51266	0.0791592
Cav1WT_Endoc_3min+Strip+Genistein_400ul-L_2h_Cav1_546_actBeta1_488_.lif	Cav1WT_Endoc_3min+Genistein_Cav1_546_actBeta1_488+Vero_Settings_2	Ch_Reference_actBCh_AND_Ch_CavCh	0.137	0.536413	0.164	0.774	0.317	0; 0	0; 0\n
Cav1WT_Endoc_3min+Strip+Genistein_400ul-L_2h_Cav1_546_actBeta1_488_.lif	Cav1WT_Endoc_3min+Genistein_Cav1_546_actBeta1_488+Vero_Settings_3	Ch_Reference_actBCh_AND_Ch_CavCh	0.081	0.31715	0.198	0.737	0.317	0; 0	0; 0\n
Cav1WT_Endoc_3min+Strip+Genistein_400ul-L_2h_Cav1_546_actBeta1_488_.lif	Cav1WT_Endoc_3min+Genistein_Cav1_546_actBeta1_488+Vero_Settings_4	Ch_Reference_actBCh_AND_Ch_CavCh	0.037	0.144871	0.223	0.844	0.288	0; 0	0; 0\n
Cav1WT_Endoc_3min+Strip+Genistein_400ul-L_2h_Cav1_546_actBeta1_488_.lif	Cav1WT_Endoc_3min+Genistein_Cav1_546_actBeta1_488+Vero_Settings_5	Ch_Reference_actBCh_AND_Ch_CavCh	0.262	1.02584	0.334	0.818	0.272	0; 0	0; 0\n
Cav1WT_Endoc_3min+Strip+Genistein_400ul-L_2h_Cav1_546_actBeta1_488_.lif	Cav1WT_Endoc_3min+Genistein_Cav1_546_actBeta1_488+Vero_Settings_6	Ch_Reference_actBCh_AND_Ch_CavCh	0.116	0.45419	0.204	0.763	0.314	0; 0	0; 0\n
Cav1WT_Endoc_3min+Strip+Genistein_400ul-L_2h_Cav1_546_actBeta1_488_.lif	Cav1WT_Endoc_3min+Genistein_Cav1_546_actBeta1_488+Vero_Settings_7	Ch_Reference_actBCh_AND_Ch_CavCh	0.227	0.888802	0.245	0.829	0.294	0; 0	0; 0\n
Cav1WT_Endoc_3min+Strip+Genistein_400ul-L_2h_Cav1_546_actBeta1_488_.lif	Cav1WT_Endoc_3min+Genistein_Cav1_546_actBeta1_488+Vero_Settings_8	Ch_Reference_actBCh_AND_Ch_CavCh	0.259	1.0141	0.467	0.842	0.242	0; 0	0; 0\n
Cav1WT_Endoc_3min+Strip+Genistein_400ul-L_2h_Cav1_546_actBeta1_488_.lif	Cav1WT_Endoc_3min+Genistein_Cav1_546_actBeta1_488+Vero_Settings_9	Ch_Reference_actBCh_AND_Ch_CavCh	0.156	0.610807	0.443	0.863	0.272	0; 0	0; 0\n
Cav1WT_Endoc_3min+Strip+Genistein_400ul-L_2h_Cav1_546_actBeta1_488_.lif	Cav1WT_Endoc_3min+Genistein_Cav1_546_actBeta1_488+Vero_Settings_10	Ch_Reference_actBCh_AND_Ch_CavCh	0.052	0.203602	0.194	0.76	0.412	0; 0	0; 0\n
Cav1WT_Endoc_3min+Strip+Genistein_400ul-L_2h_Cav1_546_actBeta1_488_.lif	Cav1WT_Endoc_3min+Genistein_Cav1_546_actBeta1_488+Vero_Settings_11	Ch_Reference_actBCh_AND_Ch_CavCh	0.154	0.602976	0.241	0.813	0.309	0; 0	0; 0\n
Cav1WT_Endoc_3min+Strip+Genistein_400ul-L_2h_Cav1_546_actBeta1_488_.lif	Cav1WT_Endoc_3min+Genistein_Cav1_546_actBeta1_488+Vero_Settings_12	Ch_Reference_actBCh_AND_Ch_CavCh	0.046	0.18011	0.137	0.791	0.299	0; 0	0; 0\n
Cav1WT_Endoc_3min+Strip+Genistein_400ul-L_2h_Cav1_546_actBeta1_488_.lif	Cav1WT_Endoc_3min+Genistein_Cav1_546_actBeta1_488+Vero_Settings_13	Ch_Reference_actBCh_AND_Ch_CavCh	0.133	0.520752	0.167	0.794	0.306	0; 0	0; 0\n
Cav1WT_Endoc_3min+Strip+Genistein_400ul-L_2h_Cav1_546_actBeta1_488_.lif	Cav1WT_Endoc_3min+Genistein_Cav1_546_actBeta1_488+Vero_Settings_14	Ch_Reference_actBCh_AND_Ch_CavCh	0.151	0.591229	0.214	0.808	0.284	0; 0	0; 0\n
Cav1WT_Endoc_3min+Strip+Genistein_400ul-L_2h_Cav1_546_actBeta1_488_.lif	Cav1WT_Endoc_3min+Genistein_Cav1_546_actBeta1_488+Vero_Settings_15	Ch_Reference_actBCh_AND_Ch_CavCh	0.004	0.0156617	0.527	0.851	0.326	0; 0	0; 0\n
				#REF!
				#REF!
				#REF!
				#REF!
				#REF!
				#REF!
				#REF!
				#REF!
				#REF!
				#REF!
				#REF!
				#REF!
				#REF!
				#REF!
				#REF!
				#REF!
				#REF!
				#REF!
				#REF!
				#REF!
				#REF!
				#REF!
				#REF!
				#REF!
				#REF!
				#REF!
				#REF!
				#REF!
				#REF!
				#REF!
				#REF!
				#REF!
				#REF!
				#REF!
				#REF!
				#REF!
				#REF!
				#REF!
				#REF!
				#REF!
				#REF!
				#REF!
				#REF!
				#REF!
				#REF!
				#REF!
				#REF!
				#REF!
				#REF!
				#REF!
				#REF!
				#REF!
				#REF!
				#REF!
				#REF!
				#REF!
				#REF!
				#REF!
				#REF!
				#REF!

## Sheet: WT Genis MeanFl panel 3D´
	Cav1WT	Label	Area	Mean	Perimeter	MinThr	MaxThr	Normalized to Mean fluorescence Intensity Control
Control	1	Channel_C1-Cav1WT Endoc 3min+Strip+Genistein 400ul-L 2h.lif - WT Control 2_serie_2_MAX-projection.tif:0422-0450	329.793	18.454	77.514	0	255	1.01441
	2	Channel_C1-Cav1WT Endoc 3min+Strip+Genistein 400ul-L 2h.lif - WT Control 4_serie_4_MAX-projection.tif:0446-0506	343.968	15.682	104.228	0	255	0.862038
	3	Channel_C1-Cav1WT Endoc 3min+Strip+Genistein 400ul-L 2h.lif - WT Control 5_serie_5_MAX-projection.tif:0454-0564	648.491	16.316	137.45	0	255	0.896889
	4	Channel_C1-Cav1WT Endoc 3min+Strip+Genistein 400ul-L 2h.lif - WT Control 6_serie_6_MAX-projection.tif:0445-0632	483.072	16.958	105.238	0	255	0.932179
	5	Channel_C1-Cav1WT Endoc 3min+Strip+Genistein 400ul-L 2h.lif - WT Control 7_serie_7_MAX-projection.tif:0589-0514	424.361	16.641	139.43	0	255	0.914754
	6	Channel_C1-Cav1WT Endoc 3min+Strip+Genistein 400ul-L 2h.lif - WT Control 8_serie_8_MAX-projection.tif:0477-0553	619.09	24.158	116.509	0	255	1.32796
	7	Channel_C1-Cav1WT Endoc 3min+Strip+Genistein 400ul-L 2h.lif - WT Control 9_serie_9_MAX-projection.tif:0438-0490	608.888	16.461	103.442	0	255	0.904859
	8	Channel_C1-Cav1WT Endoc 3min+Strip+Genistein 400ul-L 2h.lif - WT Control 10_serie_10_MAX-projection.tif:0473-0533	333.006	20.483	70.694	0	255	1.12595
	9	Channel_C1-Cav1WT Endoc 3min+Strip+Genistein 400ul-L 2h.lif - WT Control 11_serie_26_MAX-projection.tif:0403-0487	396.209	18.573	88.9	0	255	1.02096
			Average	18.1918				1
			SEM	0.895977				0.0492518
	Cav1WT	Label	Area	Mean	Perimeter	MinThr	MaxThr
Genistein-treated	1	Channel_C1-Cav1WT Endoc 3min+Strip+Genistein 400ul-L 2h.lif - WT Genistein 2_serie_12_MAX-projection.tif:0596-0574	214.481	14.182	85.26	0	255	0.779583
	2	Channel_C1-Cav1WT Endoc 3min+Strip+Genistein 400ul-L 2h.lif - WT Genistein 3_serie_13_MAX-projection.tif:0449-0598	379.449	14.584	94.73	0	255	0.801681
	3	Channel_C1-Cav1WT Endoc 3min+Strip+Genistein 400ul-L 2h.lif - WT Genistein 4_serie_14_MAX-projection.tif:0553-0612	207.977	15.958	66.366	0	255	0.877209
	4	Channel_C1-Cav1WT Endoc 3min+Strip+Genistein 400ul-L 2h.lif - WT Genistein 5_serie_15_MAX-projection.tif:0548-0688	452.816	15.943	104.603	0	255	0.876385
	5	Channel_C1-Cav1WT Endoc 3min+Strip+Genistein 400ul-L 2h.lif - WT Genistein 6_serie_16_MAX-projection.tif:0482-0521	345.007	15.249	92.596	0	255	0.838236
	6	Channel_C1-Cav1WT Endoc 3min+Strip+Genistein 400ul-L 2h.lif - WT Genistein 7_serie_17_MAX-projection.tif:0499-0521	292.828	15.845	114.918	0	255	0.870998
	7	Channel_C1-Cav1WT Endoc 3min+Strip+Genistein 400ul-L 2h.lif - WT Genistein 8_serie_18_MAX-projection.tif:0487-0472	601.977	17.068	109.583	0	255	0.938226
	8	Channel_C1-Cav1WT Endoc 3min+Strip+Genistein 400ul-L 2h.lif - WT Genistein 10_serie_20_MAX-projection.tif:0422-0545	260.843	9.345	82.707	0	255	0.513694
	9	Channel_C1-Cav1WT Endoc 3min+Strip+Genistein 400ul-L 2h.lif - WT Genistein 11_serie_21_MAX-projection.tif:0540-0532	414.107	13.57	104.843	0	255	0.745941
	10	Channel_C1-Cav1WT Endoc 3min+Strip+Genistein 400ul-L 2h.lif - WT Genistein 12_serie_22_MAX-projection.tif:0431-0466	233.806	15.906	61.576	0	255	0.874351
	11	Channel_C1-Cav1WT Endoc 3min+Strip+Genistein 400ul-L 2h.lif - WT Genistein 13_serie_23_MAX-projection.tif:0483-0487	253.57	16.148	72.343	0	255	0.887654
	12	Channel_C1-Cav1WT Endoc 3min+Strip+Genistein 400ul-L 2h.lif - WT Genistein 14_serie_24_MAX-projection.tif:0484-0524	295.681	17.276	72.008	0	255	0.94966
	13	Channel_C1-Cav1WT Endoc 3min+Strip+Genistein 400ul-L 2h.lif - WT Genistein 15_serie_25_MAX-projection.tif:0522-0527	875.899	15.058	134.515	0	255	0.827737
	14	Channel_C1-Cav1WT Endoc 3min+Strip+Genistein 400ul-L 2h.lif - WT Genistein_serie_11_MAX-projection.tif:0521-0512	214.599	13.518	74.504	0	255	0.743083
			Average	14.975				0.823174
			SEM	0.530579				0.0291659

## Sheet: 9EG7-LacCer panel 3I
Image File	Image Serie	Channels Analyzed (ch1 vs. ch2)	Pearson coeff.	Normalized by Cav1WT Mean Control	M1	M2	ICQ	Ch1 threshold range	Ch2 threshold range
Cav1WT_vs_KO_Endoc_3min+Back_Exch_permeabilized+Genistein_400umol-L_2h_BodipyLacCer_5uM_9EG7_647.lif	Cav1WT_Endoc_3min_BodipyLcCer_5uM_9EG7_647	Ch_Reference_actBCh_AND_Ch_BodipyCh	0.164	0.514429	0.585	0.632	0.177	0; 0	0; 0\n
Cav1WT_vs_KO_Endoc_3min+Back_Exch_permeabilized+Genistein_400umol-L_2h_BodipyLacCer_5uM_9EG7_647.lif	Cav1WT_Endoc_3min_BodipyLcCer_5uM_9EG7_647_2	Ch_Reference_actBCh_AND_Ch_BodipyCh	0.157	0.492472	0.596	0.804	0.164	0; 0	0; 0\n
Cav1WT_vs_KO_Endoc_3min+Back_Exch_permeabilized+Genistein_400umol-L_2h_BodipyLacCer_5uM_9EG7_647.lif	Cav1WT_Endoc_3min_BodipyLcCer_5uM_9EG7_647_3	Ch_Reference_actBCh_AND_Ch_BodipyCh	0.256	0.803011	0.692	0.682	0.207	0; 0	0; 0\n
Cav1WT_vs_KO_Endoc_3min+Back_Exch_permeabilized+Genistein_400umol-L_2h_BodipyLacCer_5uM_9EG7_647.lif	Cav1WT_Endoc_3min_BodipyLcCer_5uM_9EG7_647_4	Ch_Reference_actBCh_AND_Ch_BodipyCh	0.209	0.655583	0.693	0.75	0.188	0; 0	0; 0\n
Cav1WT_vs_KO_Endoc_3min+Back_Exch_permeabilized+Genistein_400umol-L_2h_BodipyLacCer_5uM_9EG7_647.lif	Cav1WT_Endoc_3min_BodipyLcCer_5uM_9EG7_647_5	Ch_Reference_actBCh_AND_Ch_BodipyCh	0.211	0.661857	0.686	0.677	0.186	0; 0	0; 0\n
Cav1WT_vs_KO_Endoc_3min+Back_Exch_permeabilized+Genistein_400umol-L_2h_BodipyLacCer_5uM_9EG7_647.lif	Cav1WT_Endoc_3min_BodipyLcCer_5uM_9EG7_647_6	Ch_Reference_actBCh_AND_Ch_BodipyCh	0.251	0.787327	0.736	0.656	0.255	0; 0	0; 0\n				Average	SEM			Average	SEM
Cav1WT_vs_KO_Endoc_3min+Back_Exch_permeabilized+Genistein_400umol-L_2h_BodipyLacCer_5uM_9EG7_647.lif	Cav1WT_Endoc_3min_BodipyLcCer_5uM_9EG7_647_7	Ch_Reference_actBCh_AND_Ch_BodipyCh	0.239	0.749686	0.787	0.647	0.252	0; 0	0; 0\n		Cav1WT Control	9EG7 vs LacCer Bodipy	0.3188	0.0299151	Cav1KO Control	9EG7 vs LacCer Bodipy	0.108067	0.0198279
Cav1WT_vs_KO_Endoc_3min+Back_Exch_permeabilized+Genistein_400umol-L_2h_BodipyLacCer_5uM_9EG7_647.lif	Cav1WT_Endoc_3min_BodipyLcCer_5uM_9EG7_647_8	Ch_Reference_actBCh_AND_Ch_BodipyCh	0.334	1.04768	0.824	0.683	0.223	0; 0	0; 0\n		Cav1WT + Genistein	9EG7 vs LacCer Bodipy	0.0875333	0.0200575
Cav1WT_vs_KO_Endoc_3min+Back_Exch_permeabilized+Genistein_400umol-L_2h_BodipyLacCer_5uM_9EG7_647.lif	Cav1WT_Endoc_3min_BodipyLcCer_5uM_9EG7_647_9	Ch_Reference_actBCh_AND_Ch_BodipyCh	0.459	1.43977	0.909	0.836	0.345	0; 0	0; 0\n
Cav1WT_vs_KO_Endoc_3min+Back_Exch_permeabilized+Genistein_400umol-L_2h_BodipyLacCer_5uM_9EG7_647.lif	Cav1WT_Endoc_3min_BodipyLcCer_5uM_9EG7_647_10	Ch_Reference_actBCh_AND_Ch_BodipyCh	0.337	1.05709	0.761	0.597	0.26	0; 0	0; 0\n		Cav1WT
Cav1WT_vs_KO_Endoc_3min+Back_Exch_permeabilized+Genistein_400umol-L_2h_BodipyLacCer_5uM_9EG7_647.lif	Cav1WT_Endoc_3min_BodipyLcCer_5uM_9EG7_647_11	Ch_Reference_actBCh_AND_Ch_BodipyCh	0.466	1.46173	0.893	0.787	0.353	0; 0	0; 0\n		Cav1KO
Cav1WT_vs_KO_Endoc_3min+Back_Exch_permeabilized+Genistein_400umol-L_2h_BodipyLacCer_5uM_9EG7_647.lif	Cav1WT_Endoc_3min_BodipyLcCer_5uM_9EG7_647_12	Ch_Reference_actBCh_AND_Ch_BodipyCh	0.449	1.40841	0.888	0.776	0.292	0; 0	0; 0\n
Cav1WT_vs_KO_Endoc_3min+Back_Exch_permeabilized+Genistein_400umol-L_2h_BodipyLacCer_5uM_9EG7_647.lif	Cav1WT_Endoc_3min_BodipyLcCer_5uM_9EG7_647_13	Ch_Reference_actBCh_AND_Ch_BodipyCh	0.337	1.05709	0.823	0.669	0.255	0; 0	0; 0\n
Cav1WT_vs_KO_Endoc_3min+Back_Exch_permeabilized+Genistein_400umol-L_2h_BodipyLacCer_5uM_9EG7_647.lif	Cav1WT_Endoc_3min_BodipyLcCer_5uM_9EG7_647_14	Ch_Reference_actBCh_AND_Ch_BodipyCh	0.424	1.32999	0.851	0.743	0.335	0; 0	0; 0\n
Cav1WT_vs_KO_Endoc_3min+Back_Exch_permeabilized+Genistein_400umol-L_2h_BodipyLacCer_5uM_9EG7_647.lif	Cav1WT_Endoc_3min_BodipyLcCer_5uM_9EG7_647_15	Ch_Reference_actBCh_AND_Ch_BodipyCh	0.489	1.53388	0.881	0.767	0.36	0; 0	0; 0\n
Cav1WT_vs_KO_Endoc_3min+Back_Exch_permeabilized+Genistein_400umol-L_2h_BodipyLacCer_5uM_9EG7_647.lif	Cav1KO_Endoc_3min_BodipyLcCer_5uM_9EG7_647	Ch_Reference_actBCh_AND_Ch_BodipyCh	0.189	0.592848	0.823	0.442	0.178	0; 0	0; 0\n
Cav1WT_vs_KO_Endoc_3min+Back_Exch_permeabilized+Genistein_400umol-L_2h_BodipyLacCer_5uM_9EG7_647.lif	Cav1KO_Endoc_3min_BodipyLcCer_5uM_9EG7_647_2	Ch_Reference_actBCh_AND_Ch_BodipyCh	-0.031	-0.0972396	0.43	0.372	0.16	0; 0	0; 0\n
Cav1WT_vs_KO_Endoc_3min+Back_Exch_permeabilized+Genistein_400umol-L_2h_BodipyLacCer_5uM_9EG7_647.lif	Cav1KO_Endoc_3min_BodipyLcCer_5uM_9EG7_647_3	Ch_Reference_actBCh_AND_Ch_BodipyCh	0.032	0.100376	0.502	0.471	0.153	0; 0	0; 0\n
Cav1WT_vs_KO_Endoc_3min+Back_Exch_permeabilized+Genistein_400umol-L_2h_BodipyLacCer_5uM_9EG7_647.lif	Cav1KO_Endoc_3min_BodipyLcCer_5uM_9EG7_647_4	Ch_Reference_actBCh_AND_Ch_BodipyCh	0.03	0.0941029	0.485	0.462	0.157	0; 0	0; 0\n
Cav1WT_vs_KO_Endoc_3min+Back_Exch_permeabilized+Genistein_400umol-L_2h_BodipyLacCer_5uM_9EG7_647.lif	Cav1KO_Endoc_3min_BodipyLcCer_5uM_9EG7_647_5	Ch_Reference_actBCh_AND_Ch_BodipyCh	0.075	0.235257	0.545	0.512	0.147	0; 0	0; 0\n
Cav1WT_vs_KO_Endoc_3min+Back_Exch_permeabilized+Genistein_400umol-L_2h_BodipyLacCer_5uM_9EG7_647.lif	Cav1KO_Endoc_3min_BodipyLcCer_5uM_9EG7_647_6	Ch_Reference_actBCh_AND_Ch_BodipyCh	0.145	0.454831	0.562	0.552	0.185	0; 0	0; 0\n
Cav1WT_vs_KO_Endoc_3min+Back_Exch_permeabilized+Genistein_400umol-L_2h_BodipyLacCer_5uM_9EG7_647.lif	Cav1KO_Endoc_3min_BodipyLcCer_5uM_9EG7_647_7	Ch_Reference_actBCh_AND_Ch_BodipyCh	0.253	0.793601	0.607	0.643	0.205	0; 0	0; 0\n
Cav1WT_vs_KO_Endoc_3min+Back_Exch_permeabilized+Genistein_400umol-L_2h_BodipyLacCer_5uM_9EG7_647.lif	Cav1KO_Endoc_3min_BodipyLcCer_5uM_9EG7_647_8	Ch_Reference_actBCh_AND_Ch_BodipyCh	0.151	0.473651	0.545	0.503	0.185	0; 0	0; 0\n
Cav1WT_vs_KO_Endoc_3min+Back_Exch_permeabilized+Genistein_400umol-L_2h_BodipyLacCer_5uM_9EG7_647.lif	Cav1KO_Endoc_3min_BodipyLcCer_5uM_9EG7_647_9	Ch_Reference_actBCh_AND_Ch_BodipyCh	0.052	0.163112	0.517	0.51	0.166	0; 0	0; 0\n
Cav1WT_vs_KO_Endoc_3min+Back_Exch_permeabilized+Genistein_400umol-L_2h_BodipyLacCer_5uM_9EG7_647.lif	Cav1KO_Endoc_3min_BodipyLcCer_5uM_9EG7_647_10	Ch_Reference_actBCh_AND_Ch_BodipyCh	0.083	0.260351	0.55	0.463	0.162	0; 0	0; 0\n
Cav1WT_vs_KO_Endoc_3min+Back_Exch_permeabilized+Genistein_400umol-L_2h_BodipyLacCer_5uM_9EG7_647.lif	Cav1KO_Endoc_3min_BodipyLcCer_5uM_9EG7_647_11	Ch_Reference_actBCh_AND_Ch_BodipyCh	0.086	0.269762	0.563	0.548	0.159	0; 0	0; 0\n
Cav1WT_vs_KO_Endoc_3min+Back_Exch_permeabilized+Genistein_400umol-L_2h_BodipyLacCer_5uM_9EG7_647.lif	Cav1KO_Endoc_3min_BodipyLcCer_5uM_9EG7_647_12	Ch_Reference_actBCh_AND_Ch_BodipyCh	0.159	0.498745	0.511	0.545	0.218	0; 0	0; 0\n
Cav1WT_vs_KO_Endoc_3min+Back_Exch_permeabilized+Genistein_400umol-L_2h_BodipyLacCer_5uM_9EG7_647.lif	Cav1KO_Endoc_3min_BodipyLcCer_5uM_9EG7_647_13	Ch_Reference_actBCh_AND_Ch_BodipyCh	0.104	0.326223	0.397	0.571	0.202	0; 0	0; 0\n
Cav1WT_vs_KO_Endoc_3min+Back_Exch_permeabilized+Genistein_400umol-L_2h_BodipyLacCer_5uM_9EG7_647.lif	Cav1KO_Endoc_3min_BodipyLcCer_5uM_9EG7_647_14	Ch_Reference_actBCh_AND_Ch_BodipyCh	0.216	0.677541	0.54	0.518	0.224	0; 0	0; 0\n
Cav1WT_vs_KO_Endoc_3min+Back_Exch_permeabilized+Genistein_400umol-L_2h_BodipyLacCer_5uM_9EG7_647.lif	Cav1KO_Endoc_3min_BodipyLcCer_5uM_9EG7_647_15	Ch_Reference_actBCh_AND_Ch_BodipyCh	0.077	0.241531	0.463	0.453	0.191	0; 0	0; 0\n			Normalized by Cav1WT CONTROL
Cav1WT_vs_KO_Endoc_3min+Back_Exch_permeabilized+Genistein_400umol-L_2h_BodipyLacCer_5uM_9EG7_647.lif	Cav1WT_Endoc_3min+Genistein400umol-L_BodipyLcCer_5uM_9EG7_647	Ch_Reference_actBCh_AND_Ch_BodipyCh	0.178	0.558344	0.726	0.504	0.234	0; 0	0; 0\n				Average	SEM			Average	SEM
Cav1WT_vs_KO_Endoc_3min+Back_Exch_permeabilized+Genistein_400umol-L_2h_BodipyLacCer_5uM_9EG7_647.lif	Cav1WT_Endoc_3min+Genistein400umol-L_BodipyLcCer_5uM_9EG7_647_2	Ch_Reference_actBCh_AND_Ch_BodipyCh	0.207	0.64931	0.547	0.585	0.203	0; 0	0; 0\n		Cav1WT Control	9EG7 vs LacCer Bodipy	1	0.0938367	Cav1KO Control	9EG7 vs LacCer Bodipy	0.33898	0.0621956
Cav1WT_vs_KO_Endoc_3min+Back_Exch_permeabilized+Genistein_400umol-L_2h_BodipyLacCer_5uM_9EG7_647.lif	Cav1WT_Endoc_3min+Genistein400umol-L_BodipyLcCer_5uM_9EG7_647_3	Ch_Reference_actBCh_AND_Ch_BodipyCh	0.115	0.360728	0.582	0.424	0.173	0; 0	0; 0\n		Cav1WT + Genistein	9EG7 vs LacCer Bodipy	0.274571	0.0629156
Cav1WT_vs_KO_Endoc_3min+Back_Exch_permeabilized+Genistein_400umol-L_2h_BodipyLacCer_5uM_9EG7_647.lif	Cav1WT_Endoc_3min+Genistein400umol-L_BodipyLcCer_5uM_9EG7_647_4	Ch_Reference_actBCh_AND_Ch_BodipyCh	0.076	0.238394	0.614	0.614	0.256	0; 0	0; 0\n
Cav1WT_vs_KO_Endoc_3min+Back_Exch_permeabilized+Genistein_400umol-L_2h_BodipyLacCer_5uM_9EG7_647.lif	Cav1WT_Endoc_3min+Genistein400umol-L_BodipyLcCer_5uM_9EG7_647_5	Ch_Reference_actBCh_AND_Ch_BodipyCh	0.055	0.172522	0.551	0.548	0.142	0; 0	0; 0\n
Cav1WT_vs_KO_Endoc_3min+Back_Exch_permeabilized+Genistein_400umol-L_2h_BodipyLacCer_5uM_9EG7_647.lif	Cav1WT_Endoc_3min+Genistein400umol-L_BodipyLcCer_5uM_9EG7_647_6	Ch_Reference_actBCh_AND_Ch_BodipyCh	-0.046	-0.144291	0.461	0.456	0.143	0; 0	0; 0\n
Cav1WT_vs_KO_Endoc_3min+Back_Exch_permeabilized+Genistein_400umol-L_2h_BodipyLacCer_5uM_9EG7_647.lif	Cav1WT_Endoc_3min+Genistein400umol-L_BodipyLcCer_5uM_9EG7_647_7	Ch_Reference_actBCh_AND_Ch_BodipyCh	0.034	0.10665	0.548	0.465	0.141	0; 0	0; 0\n
Cav1WT_vs_KO_Endoc_3min+Back_Exch_permeabilized+Genistein_400umol-L_2h_BodipyLacCer_5uM_9EG7_647.lif	Cav1WT_Endoc_3min+Genistein400umol-L_BodipyLcCer_5uM_9EG7_647_8	Ch_Reference_actBCh_AND_Ch_BodipyCh	-0.051	-0.159975	0.5	0.398	0.106	0; 0	0; 0\n
Cav1WT_vs_KO_Endoc_3min+Back_Exch_permeabilized+Genistein_400umol-L_2h_BodipyLacCer_5uM_9EG7_647.lif	Cav1WT_Endoc_3min+Genistein400umol-L_BodipyLcCer_5uM_9EG7_647_9	Ch_Reference_actBCh_AND_Ch_BodipyCh	0.033	0.103513	0.514	0.437	0.133	0; 0	0; 0\n
Cav1WT_vs_KO_Endoc_3min+Back_Exch_permeabilized+Genistein_400umol-L_2h_BodipyLacCer_5uM_9EG7_647.lif	Cav1WT_Endoc_3min+Genistein400umol-L_BodipyLcCer_5uM_9EG7_647_10	Ch_Reference_actBCh_AND_Ch_BodipyCh	0.118	0.370138	0.598	0.415	0.143	0; 0	0; 0\n
Cav1WT_vs_KO_Endoc_3min+Back_Exch_permeabilized+Genistein_400umol-L_2h_BodipyLacCer_5uM_9EG7_647.lif	Cav1WT_Endoc_3min+Genistein400umol-L_BodipyLcCer_5uM_9EG7_647_11	Ch_Reference_actBCh_AND_Ch_BodipyCh	0.146	0.457967	0.591	0.519	0.163	0; 0	0; 0\n
Cav1WT_vs_KO_Endoc_3min+Back_Exch_permeabilized+Genistein_400umol-L_2h_BodipyLacCer_5uM_9EG7_647.lif	Cav1WT_Endoc_3min+Genistein400umol-L_BodipyLcCer_5uM_9EG7_647_12	Ch_Reference_actBCh_AND_Ch_BodipyCh	0.082	0.257215	0.61	0.53	0.235	0; 0	0; 0\n
Cav1WT_vs_KO_Endoc_3min+Back_Exch_permeabilized+Genistein_400umol-L_2h_BodipyLacCer_5uM_9EG7_647.lif	Cav1WT_Endoc_3min+Genistein400umol-L_BodipyLcCer_5uM_9EG7_647_13	Ch_Reference_actBCh_AND_Ch_BodipyCh	0.18	0.564617	0.583	0.388	0.199	0; 0	0; 0\n
Cav1WT_vs_KO_Endoc_3min+Back_Exch_permeabilized+Genistein_400umol-L_2h_BodipyLacCer_5uM_9EG7_647.lif	Cav1WT_Endoc_3min+Genistein400umol-L_BodipyLcCer_5uM_9EG7_647_14	Ch_Reference_actBCh_AND_Ch_BodipyCh	0.047	0.147428	0.407	0.547	0.16	0; 0	0; 0\n
Cav1WT_vs_KO_Endoc_3min+Back_Exch_permeabilized+Genistein_400umol-L_2h_BodipyLacCer_5uM_9EG7_647.lif	Cav1WT_Endoc_3min+Genistein400umol-L_BodipyLcCer_5uM_9EG7_647_15	Ch_Reference_actBCh_AND_Ch_BodipyCh	0.139	0.43601	0.529	0.519	0.174	0; 0	0; 0\n

## Sheet: WT & KO ML141 panel 3L
Image File	Image Serie	Channels Analyzed (ch1 vs. ch2)	Pearson coeff.	Normalized by Cav1WT Mean Control	M1	M2	ICQ	Ch1 threshold range	Ch2 threshold range
Cav1WT_vs_KO_Endoc_3min+Strip+ML141_10uM-only_before_endocytosis_CD44x3_647_Cav1_546_actBeta1_488.lif	Cav1WT_Endoc_3min_CD44_647_Cav1_546_actBeta1_488+Vero_Settings	Ch_Reference_actBCh_AND_Ch_CD44Ch	0.2	0.89322	0.87	0.633	0.218	0; 0	0; 0\n
Cav1WT_vs_KO_Endoc_3min+Strip+ML141_10uM-only_before_endocytosis_CD44x3_647_Cav1_546_actBeta1_488.lif	Cav1WT_Endoc_3min_CD44_647_Cav1_546_actBeta1_488+Vero_Settings_2	Ch_Reference_actBCh_AND_Ch_CD44Ch	0.262	1.17012	0.758	0.726	0.3	0; 0	0; 0\n		Cav1WT Control		Average	SEM	Cav1KO Control		Average	SEM
Cav1WT_vs_KO_Endoc_3min+Strip+ML141_10uM-only_before_endocytosis_CD44x3_647_Cav1_546_actBeta1_488.lif	Cav1WT_Endoc_3min_CD44_647_Cav1_546_actBeta1_488+Vero_Settings_3	Ch_Reference_actBCh_AND_Ch_CD44Ch	0.276	1.23264	0.742	0.734	0.31	0; 0	0; 0\n
Cav1WT_vs_KO_Endoc_3min+Strip+ML141_10uM-only_before_endocytosis_CD44x3_647_Cav1_546_actBeta1_488.lif	Cav1WT_Endoc_3min_CD44_647_Cav1_546_actBeta1_488+Vero_Settings_4	Ch_Reference_actBCh_AND_Ch_CD44Ch	0.284	1.26837	0.783	0.761	0.266	0; 0	0; 0\n			ActBeta1 vs CD44 Control	0.223909	0.0148266		ActBeta1 vs CD44	0.267286	0.015132
Cav1WT_vs_KO_Endoc_3min+Strip+ML141_10uM-only_before_endocytosis_CD44x3_647_Cav1_546_actBeta1_488.lif	Cav1WT_Endoc_3min_CD44_647_Cav1_546_actBeta1_488+Vero_Settings_5	Ch_Reference_actBCh_AND_Ch_CD44Ch	0.242	1.0808	0.681	0.724	0.267	0; 0	0; 0\n
Cav1WT_vs_KO_Endoc_3min+Strip+ML141_10uM-only_before_endocytosis_CD44x3_647_Cav1_546_actBeta1_488.lif	Cav1WT_Endoc_3min_CD44_647_Cav1_546_actBeta1_488+Vero_Settings_6	Ch_Reference_actBCh_AND_Ch_CD44Ch	0.173	0.772635	0.841	0.792	0.261	0; 0	0; 0\n
Cav1WT_vs_KO_Endoc_3min+Strip+ML141_10uM-only_before_endocytosis_CD44x3_647_Cav1_546_actBeta1_488.lif	Cav1WT_Endoc_3min_CD44_647_Cav1_546_actBeta1_488+Vero_Settings_7	Ch_Reference_actBCh_AND_Ch_CD44Ch	0.273	1.21924	0.802	0.728	0.258	0; 0	0; 0\n
Cav1WT_vs_KO_Endoc_3min+Strip+ML141_10uM-only_before_endocytosis_CD44x3_647_Cav1_546_actBeta1_488.lif	Cav1WT_Endoc_3min_CD44_647_Cav1_546_actBeta1_488+Vero_Settings_8	Ch_Reference_actBCh_AND_Ch_CD44Ch	0.131	0.585059	0.658	0.664	0.314	0; 0	0; 0\n		Cav1WT +ML141		Average	SEM	Cav1KO +ML141		Average	SEM
Cav1WT_vs_KO_Endoc_3min+Strip+ML141_10uM-only_before_endocytosis_CD44x3_647_Cav1_546_actBeta1_488.lif	Cav1WT_Endoc_3min_CD44_647_Cav1_546_actBeta1_488+Vero_Settings_9	Ch_Reference_actBCh_AND_Ch_CD44Ch	0.254	1.13439	0.74	0.653	0.285	0; 0	0; 0\n
Cav1WT_vs_KO_Endoc_3min+Strip+ML141_10uM-only_before_endocytosis_CD44x3_647_Cav1_546_actBeta1_488.lif	Cav1WT_Endoc_3min_CD44_647_Cav1_546_actBeta1_488+Vero_Settings_10	Ch_Reference_actBCh_AND_Ch_CD44Ch	0.239	1.0674	0.804	0.659	0.273	0; 0	0; 0\n			ActBeta1 vs CD44+ML141	0.201867	0.0117552		ActBeta1 vs CD44	0.180067	0.0280992
Cav1WT_vs_KO_Endoc_3min+Strip+ML141_10uM-only_before_endocytosis_CD44x3_647_Cav1_546_actBeta1_488.lif	Cav1WT_Endoc_3min_CD44_647_Cav1_546_actBeta1_488+Vero_Settings_11	Ch_Reference_actBCh_AND_Ch_CD44Ch	0.243	1.08526	0.812	0.665	0.273	0; 0	0; 0\n
Cav1WT_vs_KO_Endoc_3min+Strip+ML141_10uM-only_before_endocytosis_CD44x3_647_Cav1_546_actBeta1_488.lif	Cav1WT_Endoc_3min_CD44_647_Cav1_546_actBeta1_488+Vero_Settings_12	Ch_Reference_actBCh_AND_Ch_CD44Ch	0.102	0.455542	0.783	0.684	0.283	0; 0	0; 0\n
Cav1WT_vs_KO_Endoc_3min+Strip+ML141_10uM-only_before_endocytosis_CD44x3_647_Cav1_546_actBeta1_488.lif	Cav1WT_Endoc_3min_CD44_647_Cav1_546_actBeta1_488+Vero_Settings_13	Ch_Reference_actBCh_AND_Ch_CD44Ch	0.213	0.951279	0.618	0.63	0.324	0; 0	0; 0\n
Cav1WT_vs_KO_Endoc_3min+Strip+ML141_10uM-only_before_endocytosis_CD44x3_647_Cav1_546_actBeta1_488.lif	Cav1WT_Endoc_3min_CD44_647_Cav1_546_actBeta1_488+Vero_Settings_14	Ch_Reference_actBCh_AND_Ch_CD44Ch	0.247	1.10313	0.921	0.726	0.311	0; 0	0; 0\n
Cav1WT_vs_KO_Endoc_3min+Strip+ML141_10uM-only_before_endocytosis_CD44x3_647_Cav1_546_actBeta1_488.lif	Cav1WT_Endoc_3min_CD44_647_Cav1_546_actBeta1_488+Vero_Settings_15	Ch_Reference_actBCh_AND_Ch_CD44Ch	0.15	0.669915	0.649	0.567	0.278	0; 0	0; 0\n
Cav1WT_vs_KO_Endoc_3min+Strip+ML141_10uM_CD44_647_Cav1_546_actBeta1_488.lif	Cav1WT_Endoc_3min_CD44_647_Cav1_546_actBeta1_488	Ch_Reference_actBCh_AND_Ch_CD44Ch	0.268	1.19691	0.512	0.736	0.152	0; 0	0; 0\n
Cav1WT_vs_KO_Endoc_3min+Strip+ML141_10uM_CD44_647_Cav1_546_actBeta1_488.lif	Cav1WT_Endoc_3min_CD44_647_Cav1_546_actBeta1_488_2	Ch_Reference_actBCh_AND_Ch_CD44Ch	0.175	0.781567	0.362	0.802	0.209	0; 0	0; 0\n
Cav1WT_vs_KO_Endoc_3min+Strip+ML141_10uM_CD44_647_Cav1_546_actBeta1_488.lif	Cav1WT_Endoc_3min_CD44_647_Cav1_546_actBeta1_488_3	Ch_Reference_actBCh_AND_Ch_CD44Ch	0.23	1.0272	0.429	0.838	0.19	0; 0	0; 0\n
Cav1WT_vs_KO_Endoc_3min+Strip+ML141_10uM_CD44_647_Cav1_546_actBeta1_488.lif	Cav1WT_Endoc_3min_CD44_647_Cav1_546_actBeta1_488+Vero_Settings	Ch_Reference_actBCh_AND_Ch_CD44Ch	0.099	0.442144	0.616	0.559	0.327	0; 0	0; 0\n
Cav1WT_vs_KO_Endoc_3min+Strip+ML141_10uM_CD44_647_Cav1_546_actBeta1_488.lif	Cav1WT_Endoc_3min_CD44_647_Cav1_546_actBeta1_488+Vero_Settings_2	Ch_Reference_actBCh_AND_Ch_CD44Ch	-0.011	-0.0491271	0.494	0.449	0.206	0; 0	0; 0\n
Cav1WT_vs_KO_Endoc_3min+Strip+ML141_10uM_CD44_647_Cav1_546_actBeta1_488.lif	Cav1WT_Endoc_3min_CD44_647_Cav1_546_actBeta1_488+Vero_Settings_3	Ch_Reference_actBCh_AND_Ch_CD44Ch	0.114	0.509135	0.634	0.558	0.314	0; 0	0; 0\n
Cav1WT_vs_KO_Endoc_3min+Strip+ML141_10uM_CD44_647_Cav1_546_actBeta1_488.lif	Cav1WT_Endoc_3min_CD44_647_Cav1_546_actBeta1_488+Vero_Settings_4	Ch_Reference_actBCh_AND_Ch_CD44Ch	0.207	0.924482	0.584	0.548	0.326	0; 0	0; 0\n
Cav1WT_vs_KO_Endoc_3min+Strip+ML141_10uM_CD44_647_Cav1_546_actBeta1_488.lif	Cav1WT_Endoc_3min_CD44_647_Cav1_546_actBeta1_488+Vero_Settings_5	Ch_Reference_actBCh_AND_Ch_CD44Ch	0.165	0.736906	0.624	0.571	0.28	0; 0	0; 0\n
Cav1WT_vs_KO_Endoc_3min+Strip+ML141_10uM_CD44_647_Cav1_546_actBeta1_488.lif	Cav1WT_Endoc_3min_CD44_647_Cav1_546_actBeta1_488+Vero_Settings_6	Ch_Reference_actBCh_AND_Ch_CD44Ch	0.151	0.674381	0.67	0.614	0.276	0; 0	0; 0\n								Cav1WT
Cav1WT_vs_KO_Endoc_3min+Strip+ML141_10uM_CD44_647_Cav1_546_actBeta1_488.lif	Cav1WT_Endoc_3min_CD44_647_Cav1_546_actBeta1_488+Vero_Settings_7	Ch_Reference_actBCh_AND_Ch_CD44Ch	0.288	1.28624	0.5	0.615	0.382	0; 0	0; 0\n								Cav1KO
Cav1WT_vs_KO_Endoc_3min+Strip+ML141_10uM_CD44_647_Cav1_546_actBeta1_488.lif	Cav1WT_Endoc_3min_CD44_647_Cav1_546_actBeta1_488+Vero_Settings_8	Ch_Reference_actBCh_AND_Ch_CD44Ch	0.242	1.0808	0.668	0.756	0.33	0; 0	0; 0\n
Cav1WT_vs_KO_Endoc_3min+Strip+ML141_10uM_CD44_647_Cav1_546_actBeta1_488.lif	Cav1WT_Endoc_3min_CD44_647_Cav1_546_actBeta1_488+Vero_Settings_9	Ch_Reference_actBCh_AND_Ch_CD44Ch	0.319	1.42469	0.74	0.779	0.314	0; 0	0; 0\n
Cav1WT_vs_KO_Endoc_3min+Strip+ML141_10uM_CD44_647_Cav1_546_actBeta1_488.lif	Cav1WT_Endoc_3min_CD44_647_Cav1_546_actBeta1_488+Vero_Settings_10	Ch_Reference_actBCh_AND_Ch_CD44Ch	0.395	1.76411	0.625	0.8	0.353	0; 0	0; 0\n
Cav1WT_vs_KO_Endoc_3min+Strip+ML141_10uM_CD44_647_Cav1_546_actBeta1_488.lif	Cav1WT_Endoc_3min_CD44_647_Cav1_546_actBeta1_488+Vero_Settings_11	Ch_Reference_actBCh_AND_Ch_CD44Ch	0.227	1.0138	0.757	0.794	0.269	0; 0	0; 0\n
Cav1WT_vs_KO_Endoc_3min+Strip+ML141_10uM_CD44_647_Cav1_546_actBeta1_488.lif	Cav1WT_Endoc_3min_CD44_647_Cav1_546_actBeta1_488+Vero_Settings_12	Ch_Reference_actBCh_AND_Ch_CD44Ch	0.194	0.866423	0.667	0.771	0.281	0; 0	0; 0\n			Normalized by Cav1WT Mean Control
Cav1WT_vs_KO_Endoc_3min+Strip+ML141_10uM_CD44_647_Cav1_546_actBeta1_488.lif	Cav1WT_Endoc_3min_CD44_647_Cav1_546_actBeta1_488+Vero_Settings_13	Ch_Reference_actBCh_AND_Ch_CD44Ch	0.085	0.379618	0.784	0.72	0.286	0; 0	0; 0\n		Cav1WT Control		Average	SEM	Cav1KO Control		Average	SEM
Cav1WT_vs_KO_Endoc_3min+Strip+ML141_10uM_CD44_647_Cav1_546_actBeta1_488.lif	Cav1WT_Endoc_3min_CD44_647_Cav1_546_actBeta1_488+Vero_Settings_14	Ch_Reference_actBCh_AND_Ch_CD44Ch	0.22	0.982542	0.633	0.76	0.302	0; 0	0; 0\n
Cav1WT_vs_KO_Endoc_3min+Strip+ML141_10uM_CD44_647_Cav1_546_actBeta1_488.lif	Cav1WT_Endoc_3min_CD44_647_Cav1_546_actBeta1_488+Vero_Settings_15	Ch_Reference_actBCh_AND_Ch_CD44Ch	0.393	1.75518	0.582	0.794	0.35	0; 0	0; 0\n			ActBeta1 vs CD44 Control	1	0.066217		ActBeta1 vs CD44	1.19372	0.0713285
Cav1WT_vs_KO_Endoc_3min+Strip_CD44_647_Cav1_546_actBeta1_488.lif	Cav1WT_Endoc_3min_CD44_647_Cav1_546_actBeta1_488	Ch_Reference_actBCh_AND_Ch_CD44Ch	-0.1	-0.44661	0.481	0.626	0.128	0; 0	0; 0\n
Cav1WT_vs_KO_Endoc_3min+Strip_CD44_647_Cav1_546_actBeta1_488.lif	Cav1WT_Endoc_3min_CD44_647_Cav1_546_actBeta1_488_2	Ch_Reference_actBCh_AND_Ch_CD44Ch	0.236	1.054	0.303	0.818	0.118	0; 0	0; 0\n
Cav1WT_vs_KO_Endoc_3min+Strip_CD44_647_Cav1_546_actBeta1_488.lif	Cav1WT_Endoc_3min_CD44_647_Cav1_546_actBeta1_488_3	Ch_Reference_actBCh_AND_Ch_CD44Ch	0.339	1.51401	0.442	0.888	0.21	0; 0	0; 0\n			Normalized by Cav1WT Mean Control
Cav1WT_vs_KO_Endoc_3min+Strip_CD44_647_Cav1_546_actBeta1_488.lif	Cav1WT_Endoc_3min_CD44_647_Cav1_546_actBeta1_488_4	Ch_Reference_actBCh_AND_Ch_CD44Ch	0.39	1.74178	0.512	0.889	0.193	0; 0	0; 0\n		Cav1WT +ML141		Average	SEM	Cav1KO +ML141		Average	SEM
Cav1WT_vs_KO_Endoc_3min+Strip_CD44_647_Cav1_546_actBeta1_488.lif	Cav1WT_Endoc_3min_CD44_647_Cav1_546_actBeta1_488_5	Ch_Reference_actBCh_AND_Ch_CD44Ch	0.311	1.38896	0.466	0.89	0.178	0; 0	0; 0\n
Cav1WT_vs_KO_Endoc_3min+Strip_CD44_647_Cav1_546_actBeta1_488.lif	Cav1WT_Endoc_3min_CD44_647_Cav1_546_actBeta1_488_6	Ch_Reference_actBCh_AND_Ch_CD44Ch	0.28	1.25051	0.226	0.843	0.174	0; 0	0; 0\n			ActBeta1 vs CD44 Control	0.901556	0.0433505		ActBeta1 vs CD44	0.804195	0.125494
Cav1WT_vs_KO_Endoc_3min+Strip_CD44_647_Cav1_546_actBeta1_488.lif	Cav1WT_Endoc_3min_CD44_647_Cav1_546_actBeta1_488_7	Ch_Reference_actBCh_AND_Ch_CD44Ch	0.17	0.759237	0.235	0.82	0.146	0; 0	0; 0\n
Cav1WT_vs_KO_Endoc_3min+Strip_CD44_647_Cav1_546_actBeta1_488.lif	Cav1WT_Endoc_3min_CD44_647_Cav1_546_actBeta1_488_8	Ch_Reference_actBCh_AND_Ch_CD44Ch	0.309	1.38002	0.585	0.892	0.248	0; 0	0; 0\n
Cav1WT_vs_KO_Endoc_3min+Strip_CD44_647_Cav1_546_actBeta1_488.lif	Cav1WT_Endoc_3min_CD44_647_Cav1_546_actBeta1_488_9	Ch_Reference_actBCh_AND_Ch_CD44Ch	0.24	1.07186	0.364	0.834	0.151	0; 0	0; 0\n
Cav1WT_vs_KO_Endoc_3min+Strip_CD44_647_Cav1_546_actBeta1_488.lif	Cav1WT_Endoc_3min_CD44_647_Cav1_546_actBeta1_488_10	Ch_Reference_actBCh_AND_Ch_CD44Ch	0.304	1.35769	0.524	0.84	0.211	0; 0	0; 0\n
Cav1WT_vs_KO_Endoc_3min+Strip_CD44_647_Cav1_546_actBeta1_488.lif	Cav1WT_Endoc_3min_CD44_647_Cav1_546_actBeta1_488_11	Ch_Reference_actBCh_AND_Ch_CD44Ch	0.323	1.44255	0.633	0.897	0.315	0; 0	0; 0\n
Cav1WT_vs_KO_Endoc_3min+Strip+ML141_10uM-only_before_endocytosis_CD44x3_647_Cav1_546_actBeta1_488.lif	Cav1KO_Endoc_3min_CD44_647_Cav1_546_actBeta1_488+Vero_Settings	Ch_Reference_actBCh_AND_Ch_CD44Ch	0.419	1.8713	0.773	0.74	0.28	0; 0	0; 0\n
Cav1WT_vs_KO_Endoc_3min+Strip+ML141_10uM-only_before_endocytosis_CD44x3_647_Cav1_546_actBeta1_488.lif	Cav1KO_Endoc_3min_CD44_647_Cav1_546_actBeta1_488+Vero_Settings_2	Ch_Reference_actBCh_AND_Ch_CD44Ch	0.264	1.17905	0.705	0.742	0.313	0; 0	0; 0\n
Cav1WT_vs_KO_Endoc_3min+Strip+ML141_10uM-only_before_endocytosis_CD44x3_647_Cav1_546_actBeta1_488.lif	Cav1KO_Endoc_3min_CD44_647_Cav1_546_actBeta1_488+Vero_Settings_3	Ch_Reference_actBCh_AND_Ch_CD44Ch	0.165	0.736906	0.628	0.687	0.331	0; 0	0; 0\n
Cav1WT_vs_KO_Endoc_3min+Strip+ML141_10uM-only_before_endocytosis_CD44x3_647_Cav1_546_actBeta1_488.lif	Cav1KO_Endoc_3min_CD44_647_Cav1_546_actBeta1_488+Vero_Settings_4	Ch_Reference_actBCh_AND_Ch_CD44Ch	0.349	1.55867	0.741	0.774	0.323	0; 0	0; 0\n
Cav1WT_vs_KO_Endoc_3min+Strip+ML141_10uM-only_before_endocytosis_CD44x3_647_Cav1_546_actBeta1_488.lif	Cav1KO_Endoc_3min_CD44_647_Cav1_546_actBeta1_488+Vero_Settings_5	Ch_Reference_actBCh_AND_Ch_CD44Ch	0.185	0.826228	0.562	0.694	0.345	0; 0	0; 0\n
Cav1WT_vs_KO_Endoc_3min+Strip+ML141_10uM-only_before_endocytosis_CD44x3_647_Cav1_546_actBeta1_488.lif	Cav1KO_Endoc_3min_CD44_647_Cav1_546_actBeta1_488+Vero_Settings_6	Ch_Reference_actBCh_AND_Ch_CD44Ch	0.129	0.576127	0.666	0.719	0.293	0; 0	0; 0\n
Cav1WT_vs_KO_Endoc_3min+Strip+ML141_10uM-only_before_endocytosis_CD44x3_647_Cav1_546_actBeta1_488.lif	Cav1KO_Endoc_3min_CD44_647_Cav1_546_actBeta1_488+Vero_Settings_7	Ch_Reference_actBCh_AND_Ch_CD44Ch	0.236	1.054	0.806	0.806	0.254	0; 0	0; 0\n
Cav1WT_vs_KO_Endoc_3min+Strip+ML141_10uM-only_before_endocytosis_CD44x3_647_Cav1_546_actBeta1_488.lif	Cav1KO_Endoc_3min_CD44_647_Cav1_546_actBeta1_488+Vero_Settings_8	Ch_Reference_actBCh_AND_Ch_CD44Ch	0.239	1.0674	0.684	0.745	0.294	0; 0	0; 0\n
Cav1WT_vs_KO_Endoc_3min+Strip+ML141_10uM-only_before_endocytosis_CD44x3_647_Cav1_546_actBeta1_488.lif	Cav1KO_Endoc_3min_CD44_647_Cav1_546_actBeta1_488+Vero_Settings_9	Ch_Reference_actBCh_AND_Ch_CD44Ch	0.298	1.3309	0.789	0.834	0.343	0; 0	0; 0\n
Cav1WT_vs_KO_Endoc_3min+Strip+ML141_10uM-only_before_endocytosis_CD44x3_647_Cav1_546_actBeta1_488.lif	Cav1KO_Endoc_3min_CD44_647_Cav1_546_actBeta1_488+Vero_Settings_10	Ch_Reference_actBCh_AND_Ch_CD44Ch	0.251	1.12099	0.877	0.835	0.344	0; 0	0; 0\n
Cav1WT_vs_KO_Endoc_3min+Strip+ML141_10uM-only_before_endocytosis_CD44x3_647_Cav1_546_actBeta1_488.lif	Cav1KO_Endoc_3min_CD44_647_Cav1_546_actBeta1_488+Vero_Settings_11	Ch_Reference_actBCh_AND_Ch_CD44Ch	0.644	2.87617	0.929	0.883	0.368	0; 0	0; 0\n
Cav1WT_vs_KO_Endoc_3min+Strip+ML141_10uM-only_before_endocytosis_CD44x3_647_Cav1_546_actBeta1_488.lif	Cav1KO_Endoc_3min_CD44_647_Cav1_546_actBeta1_488+Vero_Settings_12	Ch_Reference_actBCh_AND_Ch_CD44Ch	0.3	1.33983	0.768	0.84	0.231	0; 0	0; 0\n
Cav1WT_vs_KO_Endoc_3min+Strip+ML141_10uM-only_before_endocytosis_CD44x3_647_Cav1_546_actBeta1_488.lif	Cav1KO_Endoc_3min_CD44_647_Cav1_546_actBeta1_488+Vero_Settings_13	Ch_Reference_actBCh_AND_Ch_CD44Ch	0.315	1.40682	0.799	0.828	0.274	0; 0	0; 0\n
Cav1WT_vs_KO_Endoc_3min+Strip+ML141_10uM-only_before_endocytosis_CD44x3_647_Cav1_546_actBeta1_488.lif	Cav1KO_Endoc_3min_CD44_647_Cav1_546_actBeta1_488+Vero_Settings_14	Ch_Reference_actBCh_AND_Ch_CD44Ch	0.278	1.24158	0.755	0.836	0.24	0; 0	0; 0\n
Cav1WT_vs_KO_Endoc_3min+Strip+ML141_10uM-only_before_endocytosis_CD44x3_647_Cav1_546_actBeta1_488.lif	Cav1KO_Endoc_3min_CD44_647_Cav1_546_actBeta1_488+Vero_Settings_15	Ch_Reference_actBCh_AND_Ch_CD44Ch	0.283	1.26391	0.735	0.819	0.305	0; 0	0; 0\n
Cav1WT_vs_KO_Endoc_3min+Strip+ML141_10uM_CD44_647_Cav1_546_actBeta1_488.lif	Cav1KO_Endoc_3min_CD44_647_Cav1_546_actBeta1_488+Vero_Settings	Ch_Reference_actBCh_AND_Ch_CD44Ch	0.251	1.12099	0.525	0.597	0.383	0; 0	0; 0\n
Cav1WT_vs_KO_Endoc_3min+Strip+ML141_10uM_CD44_647_Cav1_546_actBeta1_488.lif	Cav1KO_Endoc_3min_CD44_647_Cav1_546_actBeta1_488+Vero_Settings_2	Ch_Reference_actBCh_AND_Ch_CD44Ch	0.216	0.964677	0.654	0.63	0.284	0; 0	0; 0\n
Cav1WT_vs_KO_Endoc_3min+Strip+ML141_10uM_CD44_647_Cav1_546_actBeta1_488.lif	Cav1KO_Endoc_3min_CD44_647_Cav1_546_actBeta1_488+Vero_Settings_3	Ch_Reference_actBCh_AND_Ch_CD44Ch	0.378	1.68819	0.67	0.743	0.318	0; 0	0; 0\n
Cav1WT_vs_KO_Endoc_3min+Strip+ML141_10uM_CD44_647_Cav1_546_actBeta1_488.lif	Cav1KO_Endoc_3min_CD44_647_Cav1_546_actBeta1_488+Vero_Settings_4	Ch_Reference_actBCh_AND_Ch_CD44Ch	0.309	1.38002	0.569	0.685	0.338	0; 0	0; 0\n
Cav1WT_vs_KO_Endoc_3min+Strip+ML141_10uM_CD44_647_Cav1_546_actBeta1_488.lif	Cav1KO_Endoc_3min_CD44_647_Cav1_546_actBeta1_488+Vero_Settings_5	Ch_Reference_actBCh_AND_Ch_CD44Ch	0.006	0.0267966	0.527	0.382	0.251	0; 0	0; 0\n
Cav1WT_vs_KO_Endoc_3min+Strip+ML141_10uM_CD44_647_Cav1_546_actBeta1_488.lif	Cav1KO_Endoc_3min_CD44_647_Cav1_546_actBeta1_488+Vero_Settings_6	Ch_Reference_actBCh_AND_Ch_CD44Ch	0.216	0.964677	0.469	0.545	0.344	0; 0	0; 0\n
Cav1WT_vs_KO_Endoc_3min+Strip+ML141_10uM_CD44_647_Cav1_546_actBeta1_488.lif	Cav1KO_Endoc_3min_CD44_647_Cav1_546_actBeta1_488+Vero_Settings_7	Ch_Reference_actBCh_AND_Ch_CD44Ch	0.321	1.43362	0.693	0.638	0.285	0; 0	0; 0\n
Cav1WT_vs_KO_Endoc_3min+Strip+ML141_10uM_CD44_647_Cav1_546_actBeta1_488.lif	Cav1KO_Endoc_3min_CD44_647_Cav1_546_actBeta1_488+Vero_Settings_8	Ch_Reference_actBCh_AND_Ch_CD44Ch	0.268	1.19691	0.719	0.651	0.287	0; 0	0; 0\n
Cav1WT_vs_KO_Endoc_3min+Strip+ML141_10uM_CD44_647_Cav1_546_actBeta1_488.lif	Cav1KO_Endoc_3min_CD44_647_Cav1_546_actBeta1_488+Vero_Settings_9	Ch_Reference_actBCh_AND_Ch_CD44Ch	0.265	1.18352	0.477	0.603	0.343	0; 0	0; 0\n
Cav1WT_vs_KO_Endoc_3min+Strip+ML141_10uM_CD44_647_Cav1_546_actBeta1_488.lif	Cav1KO_Endoc_3min_CD44_647_Cav1_546_actBeta1_488+Vero_Settings_10	Ch_Reference_actBCh_AND_Ch_CD44Ch	0.177	0.790499	0.699	0.698	0.277	0; 0	0; 0\n
Cav1WT_vs_KO_Endoc_3min+Strip+ML141_10uM_CD44_647_Cav1_546_actBeta1_488.lif	Cav1KO_Endoc_3min_CD44_647_Cav1_546_actBeta1_488+Vero_Settings_11	Ch_Reference_actBCh_AND_Ch_CD44Ch	0.371	1.65692	0.595	0.656	0.365	0; 0	0; 0\n
Cav1WT_vs_KO_Endoc_3min+Strip+ML141_10uM_CD44_647_Cav1_546_actBeta1_488.lif	Cav1KO_Endoc_3min_CD44_647_Cav1_546_actBeta1_488+Vero_Settings_12	Ch_Reference_actBCh_AND_Ch_CD44Ch	0.169	0.754771	0.509	0.63	0.341	0; 0	0; 0\n
Cav1WT_vs_KO_Endoc_3min+Strip+ML141_10uM_CD44_647_Cav1_546_actBeta1_488.lif	Cav1KO_Endoc_3min_CD44_647_Cav1_546_actBeta1_488+Vero_Settings_13	Ch_Reference_actBCh_AND_Ch_CD44Ch	0.436	1.94722	0.513	0.729	0.38	0; 0	0; 0\n
Cav1WT_vs_KO_Endoc_3min+Strip+ML141_10uM_CD44_647_Cav1_546_actBeta1_488.lif	Cav1KO_Endoc_3min_CD44_647_Cav1_546_actBeta1_488+Vero_Settings_14	Ch_Reference_actBCh_AND_Ch_CD44Ch	0.419	1.8713	0.749	0.745	0.321	0; 0	0; 0\n
Cav1WT_vs_KO_Endoc_3min+Strip+ML141_10uM_CD44_647_Cav1_546_actBeta1_488.lif	Cav1KO_Endoc_3min_CD44_647_Cav1_546_actBeta1_488+Vero_Settings_15	Ch_Reference_actBCh_AND_Ch_CD44Ch	0.229	1.02274	0.581	0.601	0.336	0; 0	0; 0\n
Cav1WT_vs_KO_Endoc_3min+Strip_CD44_647_Cav1_546_actBeta1_488.lif	Cav1KO_Endoc_3min_CD44_647_Cav1_546_actBeta1_488	Ch_Reference_actBCh_AND_Ch_CD44Ch	0.291	1.29963	0.343	0.897	0.092	0; 0	0; 0\n
Cav1WT_vs_KO_Endoc_3min+Strip_CD44_647_Cav1_546_actBeta1_488.lif	Cav1KO_Endoc_3min_CD44_647_Cav1_546_actBeta1_488_2	Ch_Reference_actBCh_AND_Ch_CD44Ch	0.198	0.884287	0.415	0.797	0.203	0; 0	0; 0\n
Cav1WT_vs_KO_Endoc_3min+Strip_CD44_647_Cav1_546_actBeta1_488.lif	Cav1KO_Endoc_3min_CD44_647_Cav1_546_actBeta1_488_3	Ch_Reference_actBCh_AND_Ch_CD44Ch	0.211	0.942347	0.472	0.812	0.192	0; 0	0; 0\n
Cav1WT_vs_KO_Endoc_3min+Strip_CD44_647_Cav1_546_actBeta1_488.lif	Cav1KO_Endoc_3min_CD44_647_Cav1_546_actBeta1_488_4	Ch_Reference_actBCh_AND_Ch_CD44Ch	0.264	1.17905	0.465	0.839	0.201	0; 0	0; 0\n
Cav1WT_vs_KO_Endoc_3min+Strip_CD44_647_Cav1_546_actBeta1_488.lif	Cav1KO_Endoc_3min_CD44_647_Cav1_546_actBeta1_488_5	Ch_Reference_actBCh_AND_Ch_CD44Ch	0.222	0.991474	0.479	0.833	0.175	0; 0	0; 0\n
Cav1WT_vs_KO_Endoc_3min+Strip_CD44_647_Cav1_546_actBeta1_488.lif	Cav1KO_Endoc_3min_CD44_647_Cav1_546_actBeta1_488_6	Ch_Reference_actBCh_AND_Ch_CD44Ch	0.151	0.674381	0.521	0.779	0.164	0; 0	0; 0\n
Cav1WT_vs_KO_Endoc_3min+Strip_CD44_647_Cav1_546_actBeta1_488.lif	Cav1KO_Endoc_3min_CD44_647_Cav1_546_actBeta1_488_7	Ch_Reference_actBCh_AND_Ch_CD44Ch	0.208	0.928948	0.74	0.826	0.207	0; 0	0; 0\n
Cav1WT_vs_KO_Endoc_3min+Strip_CD44_647_Cav1_546_actBeta1_488.lif	Cav1KO_Endoc_3min_CD44_647_Cav1_546_actBeta1_488_8	Ch_Reference_actBCh_AND_Ch_CD44Ch	0.246	1.09866	0.381	0.856	0.208	0; 0	0; 0\n
Cav1WT_vs_KO_Endoc_3min+Strip_CD44_647_Cav1_546_actBeta1_488.lif	Cav1KO_Endoc_3min_CD44_647_Cav1_546_actBeta1_488_9	Ch_Reference_actBCh_AND_Ch_CD44Ch	0.388	1.73285	0.604	0.884	0.329	0; 0	0; 0\n
Cav1WT_vs_KO_Endoc_3min+Strip_CD44_647_Cav1_546_actBeta1_488.lif	Cav1KO_Endoc_3min_CD44_647_Cav1_546_actBeta1_488_10	Ch_Reference_actBCh_AND_Ch_CD44Ch	0.175	0.781567	0.542	0.827	0.186	0; 0	0; 0\n
Cav1WT_vs_KO_Endoc_3min+Strip_CD44_647_Cav1_546_actBeta1_488.lif	Cav1KO_Endoc_3min_CD44_647_Cav1_546_actBeta1_488_11	Ch_Reference_actBCh_AND_Ch_CD44Ch	0.24	1.07186	0.738	0.857	0.27	0; 0	0; 0\n
Cav1WT_vs_KO_Endoc_3min+Strip_CD44_647_Cav1_546_actBeta1_488.lif	Cav1KO_Endoc_3min_CD44_647_Cav1_546_actBeta1_488_12	Ch_Reference_actBCh_AND_Ch_CD44Ch	0.246	1.09866	0.689	0.863	0.246	0; 0	0; 0\n
Cav1WT_vs_KO_Endoc_3min+Strip+ML141_10uM-only_before_endocytosis_CD44x3_647_Cav1_546_actBeta1_488.lif	Cav1WT+ML141_Endoc_3min_CD44_647_Cav1_546_actBeta1_488+Vero_Settings	Ch_Reference_actBCh_AND_Ch_CD44Ch	0.23	1.0272	0.652	0.707	0.294	0; 0	0; 0\n
Cav1WT_vs_KO_Endoc_3min+Strip+ML141_10uM-only_before_endocytosis_CD44x3_647_Cav1_546_actBeta1_488.lif	Cav1WT+ML141_Endoc_3min_CD44_647_Cav1_546_actBeta1_488+Vero_Settings_2	Ch_Reference_actBCh_AND_Ch_CD44Ch	0.152	0.678847	0.539	0.624	0.328	0; 0	0; 0\n
Cav1WT_vs_KO_Endoc_3min+Strip+ML141_10uM-only_before_endocytosis_CD44x3_647_Cav1_546_actBeta1_488.lif	Cav1WT+ML141_Endoc_3min_CD44_647_Cav1_546_actBeta1_488+Vero_Settings_3	Ch_Reference_actBCh_AND_Ch_CD44Ch	0.245	1.09419	0.745	0.712	0.252	0; 0	0; 0\n
Cav1WT_vs_KO_Endoc_3min+Strip+ML141_10uM-only_before_endocytosis_CD44x3_647_Cav1_546_actBeta1_488.lif	Cav1WT+ML141_Endoc_3min_CD44_647_Cav1_546_actBeta1_488+Vero_Settings_4	Ch_Reference_actBCh_AND_Ch_CD44Ch	0.192	0.857491	0.511	0.676	0.321	0; 0	0; 0\n
Cav1WT_vs_KO_Endoc_3min+Strip+ML141_10uM-only_before_endocytosis_CD44x3_647_Cav1_546_actBeta1_488.lif	Cav1WT+ML141_Endoc_3min_CD44_647_Cav1_546_actBeta1_488+Vero_Settings_5	Ch_Reference_actBCh_AND_Ch_CD44Ch	0.235	1.04953	0.682	0.718	0.347	0; 0	0; 0\n
Cav1WT_vs_KO_Endoc_3min+Strip+ML141_10uM-only_before_endocytosis_CD44x3_647_Cav1_546_actBeta1_488.lif	Cav1WT+ML141_Endoc_3min_CD44_647_Cav1_546_actBeta1_488+Vero_Settings_6	Ch_Reference_actBCh_AND_Ch_CD44Ch	0.205	0.91555	0.69	0.713	0.319	0; 0	0; 0\n
Cav1WT_vs_KO_Endoc_3min+Strip+ML141_10uM-only_before_endocytosis_CD44x3_647_Cav1_546_actBeta1_488.lif	Cav1WT+ML141_Endoc_3min_CD44_647_Cav1_546_actBeta1_488+Vero_Settings_7	Ch_Reference_actBCh_AND_Ch_CD44Ch	0.17	0.759237	0.588	0.654	0.361	0; 0	0; 0\n
Cav1WT_vs_KO_Endoc_3min+Strip+ML141_10uM-only_before_endocytosis_CD44x3_647_Cav1_546_actBeta1_488.lif	Cav1WT+ML141_Endoc_3min_CD44_647_Cav1_546_actBeta1_488+Vero_Settings_8	Ch_Reference_actBCh_AND_Ch_CD44Ch	0.272	1.21478	0.696	0.715	0.349	0; 0	0; 0\n
Cav1WT_vs_KO_Endoc_3min+Strip+ML141_10uM-only_before_endocytosis_CD44x3_647_Cav1_546_actBeta1_488.lif	Cav1WT+ML141_Endoc_3min_CD44_647_Cav1_546_actBeta1_488+Vero_Settings_9	Ch_Reference_actBCh_AND_Ch_CD44Ch	0.264	1.17905	0.669	0.729	0.326	0; 0	0; 0\n
Cav1WT_vs_KO_Endoc_3min+Strip+ML141_10uM-only_before_endocytosis_CD44x3_647_Cav1_546_actBeta1_488.lif	Cav1WT+ML141_Endoc_3min_CD44_647_Cav1_546_actBeta1_488+Vero_Settings_10	Ch_Reference_actBCh_AND_Ch_CD44Ch	0.251	1.12099	0.769	0.781	0.275	0; 0	0; 0\n
Cav1WT_vs_KO_Endoc_3min+Strip+ML141_10uM-only_before_endocytosis_CD44x3_647_Cav1_546_actBeta1_488.lif	Cav1WT+ML141_Endoc_3min_CD44_647_Cav1_546_actBeta1_488+Vero_Settings_11	Ch_Reference_actBCh_AND_Ch_CD44Ch	0.353	1.57653	0.864	0.809	0.288	0; 0	0; 0\n
Cav1WT_vs_KO_Endoc_3min+Strip+ML141_10uM-only_before_endocytosis_CD44x3_647_Cav1_546_actBeta1_488.lif	Cav1WT+ML141_Endoc_3min_CD44_647_Cav1_546_actBeta1_488+Vero_Settings_12	Ch_Reference_actBCh_AND_Ch_CD44Ch	0.297	1.32643	0.7	0.711	0.332	0; 0	0; 0\n
Cav1WT_vs_KO_Endoc_3min+Strip+ML141_10uM-only_before_endocytosis_CD44x3_647_Cav1_546_actBeta1_488.lif	Cav1WT+ML141_Endoc_3min_CD44_647_Cav1_546_actBeta1_488+Vero_Settings_13	Ch_Reference_actBCh_AND_Ch_CD44Ch	0.209	0.933415	0.719	0.76	0.334	0; 0	0; 0\n
Cav1WT_vs_KO_Endoc_3min+Strip+ML141_10uM-only_before_endocytosis_CD44x3_647_Cav1_546_actBeta1_488.lif	Cav1WT+ML141_Endoc_3min_CD44_647_Cav1_546_actBeta1_488+Vero_Settings_14	Ch_Reference_actBCh_AND_Ch_CD44Ch	0.278	1.24158	0.702	0.719	0.351	0; 0	0; 0\n
Cav1WT_vs_KO_Endoc_3min+Strip+ML141_10uM-only_before_endocytosis_CD44x3_647_Cav1_546_actBeta1_488.lif	Cav1WT+ML141_Endoc_3min_CD44_647_Cav1_546_actBeta1_488+Vero_Settings_15	Ch_Reference_actBCh_AND_Ch_CD44Ch	0.117	0.522533	0.704	0.75	0.333	0; 0	0; 0\n
Cav1WT_vs_KO_Endoc_3min+Strip+ML141_10uM_CD44_647_Cav1_546_actBeta1_488.lif	Cav1WT_Endoc_3min+ML141_10uM_CD44_647_Cav1_546_actBeta1_488+Vero_Settings	Ch_Reference_actBCh_AND_Ch_CD44Ch	0.107	0.477873	0.613	0.48	0.275	0; 0	0; 0\n
Cav1WT_vs_KO_Endoc_3min+Strip+ML141_10uM_CD44_647_Cav1_546_actBeta1_488.lif	Cav1WT_Endoc_3min+ML141_10uM_CD44_647_Cav1_546_actBeta1_488+Vero_Settings_2	Ch_Reference_actBCh_AND_Ch_CD44Ch	0.117	0.522533	0.71	0.571	0.292	0; 0	0; 0\n
Cav1WT_vs_KO_Endoc_3min+Strip+ML141_10uM_CD44_647_Cav1_546_actBeta1_488.lif	Cav1WT_Endoc_3min+ML141_10uM_CD44_647_Cav1_546_actBeta1_488+Vero_Settings_3	Ch_Reference_actBCh_AND_Ch_CD44Ch	0.148	0.660983	0.68	0.54	0.257	0; 0	0; 0\n
Cav1WT_vs_KO_Endoc_3min+Strip+ML141_10uM_CD44_647_Cav1_546_actBeta1_488.lif	Cav1WT_Endoc_3min+ML141_10uM_CD44_647_Cav1_546_actBeta1_488+Vero_Settings_4	Ch_Reference_actBCh_AND_Ch_CD44Ch	0.146	0.65205	0.623	0.557	0.292	0; 0	0; 0\n
Cav1WT_vs_KO_Endoc_3min+Strip+ML141_10uM_CD44_647_Cav1_546_actBeta1_488.lif	Cav1WT_Endoc_3min+ML141_10uM_CD44_647_Cav1_546_actBeta1_488+Vero_Settings_5	Ch_Reference_actBCh_AND_Ch_CD44Ch	0.152	0.678847	0.71	0.667	0.263	0; 0	0; 0\n
Cav1WT_vs_KO_Endoc_3min+Strip+ML141_10uM_CD44_647_Cav1_546_actBeta1_488.lif	Cav1WT_Endoc_3min+ML141_10uM_CD44_647_Cav1_546_actBeta1_488+Vero_Settings_6	Ch_Reference_actBCh_AND_Ch_CD44Ch	0.188	0.839626	0.681	0.602	0.264	0; 0	0; 0\n
Cav1WT_vs_KO_Endoc_3min+Strip+ML141_10uM_CD44_647_Cav1_546_actBeta1_488.lif	Cav1WT_Endoc_3min+ML141_10uM_CD44_647_Cav1_546_actBeta1_488+Vero_Settings_7	Ch_Reference_actBCh_AND_Ch_CD44Ch	0.307	1.37109	0.642	0.614	0.293	0; 0	0; 0\n
Cav1WT_vs_KO_Endoc_3min+Strip+ML141_10uM_CD44_647_Cav1_546_actBeta1_488.lif	Cav1WT_Endoc_3min+ML141_10uM_CD44_647_Cav1_546_actBeta1_488+Vero_Settings_8	Ch_Reference_actBCh_AND_Ch_CD44Ch	0.153	0.683313	0.557	0.513	0.28	0; 0	0; 0\n
Cav1WT_vs_KO_Endoc_3min+Strip+ML141_10uM_CD44_647_Cav1_546_actBeta1_488.lif	Cav1WT_Endoc_3min+ML141_10uM_CD44_647_Cav1_546_actBeta1_488+Vero_Settings_9	Ch_Reference_actBCh_AND_Ch_CD44Ch	0.2	0.89322	0.713	0.681	0.259	0; 0	0; 0\n
Cav1WT_vs_KO_Endoc_3min+Strip+ML141_10uM_CD44_647_Cav1_546_actBeta1_488.lif	Cav1WT_Endoc_3min+ML141_10uM_CD44_647_Cav1_546_actBeta1_488+Vero_Settings_10	Ch_Reference_actBCh_AND_Ch_CD44Ch	0.159	0.71011	0.618	0.564	0.31	0; 0	0; 0\n
Cav1WT_vs_KO_Endoc_3min+Strip+ML141_10uM_CD44_647_Cav1_546_actBeta1_488.lif	Cav1WT_Endoc_3min+ML141_10uM_CD44_647_Cav1_546_actBeta1_488+Vero_Settings_11	Ch_Reference_actBCh_AND_Ch_CD44Ch	0.134	0.598457	0.752	0.575	0.229	0; 0	0; 0\n
Cav1WT_vs_KO_Endoc_3min+Strip+ML141_10uM_CD44_647_Cav1_546_actBeta1_488.lif	Cav1WT_Endoc_3min+ML141_10uM_CD44_647_Cav1_546_actBeta1_488+Vero_Settings_12	Ch_Reference_actBCh_AND_Ch_CD44Ch	0.282	1.25944	0.73	0.704	0.265	0; 0	0; 0\n
Cav1WT_vs_KO_Endoc_3min+Strip+ML141_10uM_CD44_647_Cav1_546_actBeta1_488.lif	Cav1WT_Endoc_3min+ML141_10uM_CD44_647_Cav1_546_actBeta1_488+Vero_Settings_13	Ch_Reference_actBCh_AND_Ch_CD44Ch	0.136	0.607389	0.493	0.481	0.309	0; 0	0; 0\n
Cav1WT_vs_KO_Endoc_3min+Strip+ML141_10uM_CD44_647_Cav1_546_actBeta1_488.lif	Cav1WT_Endoc_3min+ML141_10uM_CD44_647_Cav1_546_actBeta1_488+Vero_Settings_14	Ch_Reference_actBCh_AND_Ch_CD44Ch	0.185	0.826228	0.553	0.547	0.331	0; 0	0; 0\n
Cav1WT_vs_KO_Endoc_3min+Strip+ML141_10uM_CD44_647_Cav1_546_actBeta1_488.lif	Cav1WT_Endoc_3min+ML141_10uM_CD44_647_Cav1_546_actBeta1_488+Vero_Settings_15	Ch_Reference_actBCh_AND_Ch_CD44Ch	0.172	0.768169	0.661	0.608	0.29	0; 0	0; 0\n
Cav1WT_vs_KO_Endoc_3min+Strip+ML141_10uM-only_before_endocytosis_CD44x3_647_Cav1_546_actBeta1_488.lif	Cav1KO+ML141_Endoc_3min_CD44_647_Cav1_546_actBeta1_488+Vero_Settings	Ch_Reference_actBCh_AND_Ch_CD44Ch	0.515	2.30004	0.895	0.806	0.325	0; 0	0; 0\n
Cav1WT_vs_KO_Endoc_3min+Strip+ML141_10uM-only_before_endocytosis_CD44x3_647_Cav1_546_actBeta1_488.lif	Cav1KO+ML141_Endoc_3min_CD44_647_Cav1_546_actBeta1_488+Vero_Settings_2	Ch_Reference_actBCh_AND_Ch_CD44Ch	0.171	0.763703	0.692	0.726	0.327	0; 0	0; 0\n
Cav1WT_vs_KO_Endoc_3min+Strip+ML141_10uM-only_before_endocytosis_CD44x3_647_Cav1_546_actBeta1_488.lif	Cav1KO+ML141_Endoc_3min_CD44_647_Cav1_546_actBeta1_488+Vero_Settings_3	Ch_Reference_actBCh_AND_Ch_CD44Ch	0.273	1.21924	0.813	0.747	0.283	0; 0	0; 0\n
Cav1WT_vs_KO_Endoc_3min+Strip+ML141_10uM-only_before_endocytosis_CD44x3_647_Cav1_546_actBeta1_488.lif	Cav1KO+ML141_Endoc_3min_CD44_647_Cav1_546_actBeta1_488+Vero_Settings_4	Ch_Reference_actBCh_AND_Ch_CD44Ch	0.086	0.384084	0.79	0.796	0.322	0; 0	0; 0\n
Cav1WT_vs_KO_Endoc_3min+Strip+ML141_10uM-only_before_endocytosis_CD44x3_647_Cav1_546_actBeta1_488.lif	Cav1KO+ML141_Endoc_3min_CD44_647_Cav1_546_actBeta1_488+Vero_Settings_5	Ch_Reference_actBCh_AND_Ch_CD44Ch	0.259	1.15672	0.735	0.766	0.333	0; 0	0; 0\n
Cav1WT_vs_KO_Endoc_3min+Strip+ML141_10uM-only_before_endocytosis_CD44x3_647_Cav1_546_actBeta1_488.lif	Cav1KO+ML141_Endoc_3min_CD44_647_Cav1_546_actBeta1_488+Vero_Settings_6	Ch_Reference_actBCh_AND_Ch_CD44Ch	0.184	0.821762	0.656	0.729	0.321	0; 0	0; 0\n
Cav1WT_vs_KO_Endoc_3min+Strip+ML141_10uM-only_before_endocytosis_CD44x3_647_Cav1_546_actBeta1_488.lif	Cav1KO+ML141_Endoc_3min_CD44_647_Cav1_546_actBeta1_488+Vero_Settings_7	Ch_Reference_actBCh_AND_Ch_CD44Ch	0.271	1.21031	0.713	0.751	0.326	0; 0	0; 0\n
Cav1WT_vs_KO_Endoc_3min+Strip+ML141_10uM-only_before_endocytosis_CD44x3_647_Cav1_546_actBeta1_488.lif	Cav1KO+ML141_Endoc_3min_CD44_647_Cav1_546_actBeta1_488+Vero_Settings_8	Ch_Reference_actBCh_AND_Ch_CD44Ch	0.315	1.40682	0.762	0.786	0.312	0; 0	0; 0\n
Cav1WT_vs_KO_Endoc_3min+Strip+ML141_10uM-only_before_endocytosis_CD44x3_647_Cav1_546_actBeta1_488.lif	Cav1KO+ML141_Endoc_3min_CD44_647_Cav1_546_actBeta1_488+Vero_Settings_9	Ch_Reference_actBCh_AND_Ch_CD44Ch	0.297	1.32643	0.668	0.727	0.333	0; 0	0; 0\n
Cav1WT_vs_KO_Endoc_3min+Strip+ML141_10uM-only_before_endocytosis_CD44x3_647_Cav1_546_actBeta1_488.lif	Cav1KO+ML141_Endoc_3min_CD44_647_Cav1_546_actBeta1_488+Vero_Settings_10	Ch_Reference_actBCh_AND_Ch_CD44Ch	0.398	1.77751	0.754	0.753	0.31	0; 0	0; 0\n
Cav1WT_vs_KO_Endoc_3min+Strip+ML141_10uM-only_before_endocytosis_CD44x3_647_Cav1_546_actBeta1_488.lif	Cav1KO+ML141_Endoc_3min_CD44_647_Cav1_546_actBeta1_488+Vero_Settings_11	Ch_Reference_actBCh_AND_Ch_CD44Ch	0.383	1.71052	0.814	0.822	0.293	0; 0	0; 0\n
Cav1WT_vs_KO_Endoc_3min+Strip+ML141_10uM-only_before_endocytosis_CD44x3_647_Cav1_546_actBeta1_488.lif	Cav1KO+ML141_Endoc_3min_CD44_647_Cav1_546_actBeta1_488+Vero_Settings_12	Ch_Reference_actBCh_AND_Ch_CD44Ch	0.328	1.46488	0.788	0.777	0.306	0; 0	0; 0\n
Cav1WT_vs_KO_Endoc_3min+Strip+ML141_10uM-only_before_endocytosis_CD44x3_647_Cav1_546_actBeta1_488.lif	Cav1KO+ML141_Endoc_3min_CD44_647_Cav1_546_actBeta1_488+Vero_Settings_13	Ch_Reference_actBCh_AND_Ch_CD44Ch	0.322	1.43808	0.616	0.683	0.345	0; 0	0; 0\n
Cav1WT_vs_KO_Endoc_3min+Strip+ML141_10uM-only_before_endocytosis_CD44x3_647_Cav1_546_actBeta1_488.lif	Cav1KO+ML141_Endoc_3min_CD44_647_Cav1_546_actBeta1_488+Vero_Settings_14	Ch_Reference_actBCh_AND_Ch_CD44Ch	0.377	1.68372	0.693	0.754	0.357	0; 0	0; 0\n
Cav1WT_vs_KO_Endoc_3min+Strip+ML141_10uM-only_before_endocytosis_CD44x3_647_Cav1_546_actBeta1_488.lif	Cav1KO+ML141_Endoc_3min_CD44_647_Cav1_546_actBeta1_488+Vero_Settings_15	Ch_Reference_actBCh_AND_Ch_CD44Ch	0.243	1.08526	0.83	0.823	0.295	0; 0	0; 0\n
Cav1WT_vs_KO_Endoc_3min+Strip+ML141_10uM_CD44_647_Cav1_546_actBeta1_488.lif	Cav1KO_Endoc_3min+ML141_10uM_CD44_647_Cav1_546_actBeta1_488+Vero_Settings	Ch_Reference_actBCh_AND_Ch_CD44Ch	0.096	0.428745	0.56	0.396	0.298	0; 0	0; 0\n
Cav1WT_vs_KO_Endoc_3min+Strip+ML141_10uM_CD44_647_Cav1_546_actBeta1_488.lif	Cav1KO_Endoc_3min+ML141_10uM_CD44_647_Cav1_546_actBeta1_488+Vero_Settings_2	Ch_Reference_actBCh_AND_Ch_CD44Ch	0.154	0.687779	0.554	0.487	0.309	0; 0	0; 0\n
Cav1WT_vs_KO_Endoc_3min+Strip+ML141_10uM_CD44_647_Cav1_546_actBeta1_488.lif	Cav1KO_Endoc_3min+ML141_10uM_CD44_647_Cav1_546_actBeta1_488+Vero_Settings_3	Ch_Reference_actBCh_AND_Ch_CD44Ch	0.082	0.36622	0.555	0.443	0.295	0; 0	0; 0\n
Cav1WT_vs_KO_Endoc_3min+Strip+ML141_10uM_CD44_647_Cav1_546_actBeta1_488.lif	Cav1KO_Endoc_3min+ML141_10uM_CD44_647_Cav1_546_actBeta1_488+Vero_Settings_4	Ch_Reference_actBCh_AND_Ch_CD44Ch	0.042	0.187576	0.585	0.48	0.272	0; 0	0; 0\n
Cav1WT_vs_KO_Endoc_3min+Strip+ML141_10uM_CD44_647_Cav1_546_actBeta1_488.lif	Cav1KO_Endoc_3min+ML141_10uM_CD44_647_Cav1_546_actBeta1_488+Vero_Settings_5	Ch_Reference_actBCh_AND_Ch_CD44Ch	0.151	0.674381	0.608	0.529	0.278	0; 0	0; 0\n
Cav1WT_vs_KO_Endoc_3min+Strip+ML141_10uM_CD44_647_Cav1_546_actBeta1_488.lif	Cav1KO_Endoc_3min+ML141_10uM_CD44_647_Cav1_546_actBeta1_488+Vero_Settings_6	Ch_Reference_actBCh_AND_Ch_CD44Ch	-0.012	-0.0535932	0.511	0.396	0.321	0; 0	0; 0\n
Cav1WT_vs_KO_Endoc_3min+Strip+ML141_10uM_CD44_647_Cav1_546_actBeta1_488.lif	Cav1KO_Endoc_3min+ML141_10uM_CD44_647_Cav1_546_actBeta1_488+Vero_Settings_7	Ch_Reference_actBCh_AND_Ch_CD44Ch	0.011	0.0491271	0.505	0.433	0.162	0; 0	0; 0\n
Cav1WT_vs_KO_Endoc_3min+Strip+ML141_10uM_CD44_647_Cav1_546_actBeta1_488.lif	Cav1KO_Endoc_3min+ML141_10uM_CD44_647_Cav1_546_actBeta1_488+Vero_Settings_8	Ch_Reference_actBCh_AND_Ch_CD44Ch	-0.152	-0.678847	0.416	0.349	0.184	0; 0	0; 0\n
Cav1WT_vs_KO_Endoc_3min+Strip+ML141_10uM_CD44_647_Cav1_546_actBeta1_488.lif	Cav1KO_Endoc_3min+ML141_10uM_CD44_647_Cav1_546_actBeta1_488+Vero_Settings_9	Ch_Reference_actBCh_AND_Ch_CD44Ch	0.026	0.116119	0.499	0.452	0.313	0; 0	0; 0\n
Cav1WT_vs_KO_Endoc_3min+Strip+ML141_10uM_CD44_647_Cav1_546_actBeta1_488.lif	Cav1KO_Endoc_3min+ML141_10uM_CD44_647_Cav1_546_actBeta1_488+Vero_Settings_10	Ch_Reference_actBCh_AND_Ch_CD44Ch	-0.107	-0.477873	0.438	0.345	0.174	0; 0	0; 0\n
Cav1WT_vs_KO_Endoc_3min+Strip+ML141_10uM_CD44_647_Cav1_546_actBeta1_488.lif	Cav1KO_Endoc_3min+ML141_10uM_CD44_647_Cav1_546_actBeta1_488+Vero_Settings_11	Ch_Reference_actBCh_AND_Ch_CD44Ch	0.058	0.259034	0.627	0.486	0.247	0; 0	0; 0\n
Cav1WT_vs_KO_Endoc_3min+Strip+ML141_10uM_CD44_647_Cav1_546_actBeta1_488.lif	Cav1KO_Endoc_3min+ML141_10uM_CD44_647_Cav1_546_actBeta1_488+Vero_Settings_12	Ch_Reference_actBCh_AND_Ch_CD44Ch	0.177	0.790499	0.717	0.624	0.252	0; 0	0; 0\n
Cav1WT_vs_KO_Endoc_3min+Strip+ML141_10uM_CD44_647_Cav1_546_actBeta1_488.lif	Cav1KO_Endoc_3min+ML141_10uM_CD44_647_Cav1_546_actBeta1_488+Vero_Settings_13	Ch_Reference_actBCh_AND_Ch_CD44Ch	0.174	0.777101	0.532	0.473	0.341	0; 0	0; 0\n
Cav1WT_vs_KO_Endoc_3min+Strip+ML141_10uM_CD44_647_Cav1_546_actBeta1_488.lif	Cav1KO_Endoc_3min+ML141_10uM_CD44_647_Cav1_546_actBeta1_488+Vero_Settings_14	Ch_Reference_actBCh_AND_Ch_CD44Ch	0.137	0.611855	0.499	0.503	0.328	0; 0	0; 0\n
Cav1WT_vs_KO_Endoc_3min+Strip+ML141_10uM_CD44_647_Cav1_546_actBeta1_488.lif	Cav1KO_Endoc_3min+ML141_10uM_CD44_647_Cav1_546_actBeta1_488+Vero_Settings_15	Ch_Reference_actBCh_AND_Ch_CD44Ch	0.143	0.638652	0.503	0.49	0.348	0; 0	0; 0\n

## Sheet: WT&KO ML141 MeanF panel 3L´
	Cav1WT	Label	Area	Mean	Perimeter	MinThr	MaxThr	Normalized to Mean fluorescence Intensity Control			Cav1KO	Label	Area	Mean	Perimeter	MinThr	MaxThr	Normalized to Mean fluorescence Intensity Control
Control	1	Channel_C1-Cav1WT vs KO Endoc 3min+Strip+ML141 10uM.lif - WT Control 2_serie_2_MAX-projection.tif:0514-0518	383.681	18.601	101.747	0	255	1.1477		Control	1	Channel_C1-Cav1WT vs KO Endoc 3min+Strip+ML141 10uM.lif - KO Control 3_serie_18_MAX-projection.tif:0409-0541	491.327	16.67	111.243	0	255	0.800865
	2	Channel_C1-Cav1WT vs KO Endoc 3min+Strip+ML141 10uM.lif - WT Control 3_serie_3_MAX-projection.tif:0502-0569	323.917	19.78	87.243	0	255	1.22044			2	Channel_C1-Cav1WT vs KO Endoc 3min+Strip+ML141 10uM.lif - KO Control 4_serie_19_MAX-projection.tif:0568-0512	550.872	20.766	135.479	0	255	0.997646
	3	Channel_C1-Cav1WT vs KO Endoc 3min+Strip+ML141 10uM.lif - WT Control 4_serie_4_MAX-projection.tif:0393-0541	502.524	17.49	98.686	0	255	1.07915			3	Channel_C1-Cav1WT vs KO Endoc 3min+Strip+ML141 10uM.lif - KO Control 5_serie_20_MAX-projection.tif:0593-0554	473.282	16.873	115.406	0	255	0.810617
	4	Channel_C1-Cav1WT vs KO Endoc 3min+Strip+ML141 10uM.lif - WT Control 5_serie_5_MAX-projection.tif:0494-0529	360.789	19.447	77.034	0	255	1.19989			4	Channel_C1-Cav1WT vs KO Endoc 3min+Strip+ML141 10uM.lif - KO Control 6_serie_21_MAX-projection.tif:0358-0528	392.536	16.43	96.613	0	255	0.789335
	5	Channel_C1-Cav1WT vs KO Endoc 3min+Strip+ML141 10uM.lif - WT Control 6_serie_6_MAX-projection.tif:0546-0423	758.724	17.133	134.498	0	255	1.05712			5	Channel_C1-Cav1WT vs KO Endoc 3min+Strip+ML141 10uM.lif - KO Control 7_serie_22_MAX-projection.tif:0495-0524	886.256	17.227	122.346	0	255	0.827624
	6	Channel_C1-Cav1WT vs KO Endoc 3min+Strip+ML141 10uM.lif - WT Control 7_serie_7_MAX-projection.tif:0525-0527	905.118	14.309	135.105	0	255	0.882876			6	Channel_C1-Cav1WT vs KO Endoc 3min+Strip+ML141 10uM.lif - KO Control 9_serie_24_MAX-projection.tif:0560-0508	530.255	21.708	129.869	0	255	1.0429
	7	Channel_C1-Cav1WT vs KO Endoc 3min+Strip+ML141 10uM.lif - WT Control 8_serie_8_MAX-projection.tif:0450-0539	501.838	15.864	90.117	0	255	0.97882			7	Channel_C1-Cav1WT vs KO Endoc 3min+Strip+ML141 10uM.lif - KO Control 10_serie_25_MAX-projection.tif:0525-0510	632.368	23.981	182.924	0	255	1.1521
	8	Channel_C1-Cav1WT vs KO Endoc 3min+Strip+ML141 10uM.lif - WT Control 9_serie_9_MAX-projection.tif:0531-0332	580.523	13.06	117.128	0	255	0.805811			8	Channel_C1-Cav1WT vs KO Endoc 3min+Strip+ML141 10uM.lif - KO Control 11_serie_26_MAX-projection.tif:0514-0450	1154.88	41.954	197.054	0	255	2.01557
	9	Channel_C1-Cav1WT vs KO Endoc 3min+Strip+ML141 10uM.lif - WT Control 10_serie_10_MAX-projection.tif:0703-0421	361.844	11.899	110.901	0	255	0.734177			9	Channel_C1-Cav1WT vs KO Endoc 3min+Strip+ML141 10uM.lif - KO Control 12_serie_27_MAX-projection.tif:0526-0531	1034.46	19.358	168.961	0	255	0.930002
	10	Channel_C1-Cav1WT vs KO Endoc 3min+Strip+ML141 10uM.lif - WT Control 11_serie_11_MAX-projection.tif:0398-0483	621.727	15.571	117.769	0	255	0.960742			10	Channel_C1-Cav1WT vs KO Endoc 3min+Strip+ML141 10uM.lif - KO Control 13_serie_28_MAX-projection.tif:0525-0507	1339.21	18.243	177.918	0	255	0.876435
	11	Channel_C1-Cav1WT vs KO Endoc 3min+Strip+ML141 10uM.lif - WT Control 12_serie_12_MAX-projection.tif:0398-0462	430.028	17.1	89.744	0	255	1.05508			11	Channel_C1-Cav1WT vs KO Endoc 3min+Strip+ML141 10uM.lif - KO Control 14_serie_29_MAX-projection.tif:0496-0513	992.543	18.345	169.292	0	255	0.881336
	12	Channel_C1-Cav1WT vs KO Endoc 3min+Strip+ML141 10uM.lif - WT Control 13_serie_13_MAX-projection.tif:0471-0529	370.552	15.63	101.704	0	255	0.964382			12	Channel_C1-Cav1WT vs KO Endoc 3min+Strip+ML141 10uM.lif - KO Control 15_serie_30_MAX-projection.tif:0533-0507	673.878	22.379	159.051	0	255	1.07514
	13	Channel_C1-Cav1WT vs KO Endoc 3min+Strip+ML141 10uM.lif - WT Control 14_serie_14_MAX-projection.tif:0613-0425	530.459	15.545	101.088	0	255	0.959138			13	Channel_C1-Cav1WT vs KO Endoc 3min+Strip+ML141 10uM.lif - KO Control_serie_16_MAX-projection.tif:0483-0547	724.531	16.661	133.012	0	255	0.800432
	14	Channel_C1-Cav1WT vs KO Endoc 3min+Strip+ML141 10uM.lif - WT Control 15_serie_15_MAX-projection.tif:0511-0543	507.051	15.074	131.014	0	255	0.930077
	15	Channel_C1-Cav1WT vs KO Endoc 3min+Strip+ML141 10uM.lif - WT Control_serie_1_MAX-projection.tif:0437-0403	723.559	16.606	130.082	0	255	1.0246
													Average	20.815				1
			Average	16.2073				1					SEM	1.88965				0.0907833
			SEM	0.565253				0.0348765
	1	Channel_C1-Cav1WT vs KO Endoc 3min+Strip+ML141 10uM Dextran.lif - WT Control 2_serie_2_MAX-projection.tif:0547-0522	447.735	12.024	111.345	0	255	0.75229			1	Channel_C1-Cav1WT vs KO Endoc 3min+Strip+ML141 10uM Dextran.lif - KO Control 2_serie_17_MAX-projection.tif:0475-0580	789.542	12.108	135.056	0	255	0.840371
	2	Channel_C1-Cav1WT vs KO Endoc 3min+Strip+ML141 10uM Dextran.lif - WT Control 3_serie_3_MAX-projection.tif:0571-0494	923.628	14.914	121.784	0	255	0.933105			2	Channel_C1-Cav1WT vs KO Endoc 3min+Strip+ML141 10uM Dextran.lif - KO Control 3_serie_18_MAX-projection.tif:0514-0505	576.434	12.742	169.304	0	255	0.884374
	3	Channel_C1-Cav1WT vs KO Endoc 3min+Strip+ML141 10uM Dextran.lif - WT Control 4_serie_4_MAX-projection.tif:0466-0475	443.114	14.25	95.746	0	255	0.891561			3	Channel_C1-Cav1WT vs KO Endoc 3min+Strip+ML141 10uM Dextran.lif - KO Control 4_serie_19_MAX-projection.tif:0436-0513	306.857	13.494	100.168	0	255	0.936568
	4	Channel_C1-Cav1WT vs KO Endoc 3min+Strip+ML141 10uM Dextran.lif - WT Control 5_serie_5_MAX-projection.tif:0522-0573	668.103	19.394	118.676	0	255	1.2134			4	Channel_C1-Cav1WT vs KO Endoc 3min+Strip+ML141 10uM Dextran.lif - KO Control 5_serie_20_MAX-projection.tif:0398-0511	851.247	18.212	142.386	0	255	1.26403
	5	Channel_C1-Cav1WT vs KO Endoc 3min+Strip+ML141 10uM Dextran.lif - WT Control 6_serie_6_MAX-projection.tif:0440-0547	690.262	16.864	122.572	0	255	1.05511			5	Channel_C1-Cav1WT vs KO Endoc 3min+Strip+ML141 10uM Dextran.lif - KO Control 6_serie_21_MAX-projection.tif:0518-0512	349.474	14.929	104.736	0	255	1.03617
	6	Channel_C1-Cav1WT vs KO Endoc 3min+Strip+ML141 10uM Dextran.lif - WT Control 7_serie_7_MAX-projection.tif:0472-0500	771.208	15.71	118.294	0	255	0.982907			6	Channel_C1-Cav1WT vs KO Endoc 3min+Strip+ML141 10uM Dextran.lif - KO Control 7_serie_22_MAX-projection.tif:0522-0652	488.492	15.894	108.098	0	255	1.10314
	7	Channel_C1-Cav1WT vs KO Endoc 3min+Strip+ML141 10uM Dextran.lif - WT Control 8_serie_8_MAX-projection.tif:0515-0507	1413.04	13.105	146.285	0	255	0.819923			7	Channel_C1-Cav1WT vs KO Endoc 3min+Strip+ML141 10uM Dextran.lif - KO Control 8_serie_23_MAX-projection.tif:0533-0507	630.294	11.823	141.08	0	255	0.82059
	8	Channel_C1-Cav1WT vs KO Endoc 3min+Strip+ML141 10uM Dextran.lif - WT Control 9_serie_9_MAX-projection.tif:0545-0497	701.314	23.706	140.706	0	255	1.48318			8	Channel_C1-Cav1WT vs KO Endoc 3min+Strip+ML141 10uM Dextran.lif - KO Control 9_serie_24_MAX-projection.tif:0393-0510	570.28	14.824	125.354	0	255	1.02888
	9	Channel_C1-Cav1WT vs KO Endoc 3min+Strip+ML141 10uM Dextran.lif - WT Control 10_serie_10_MAX-projection.tif:0375-0524	383.238	14.337	96.445	0	255	0.897004			9	Channel_C1-Cav1WT vs KO Endoc 3min+Strip+ML141 10uM Dextran.lif - KO Control 10_serie_25_MAX-projection.tif:0505-0534	522.851	12.662	114.673	0	255	0.878822
	10	Channel_C1-Cav1WT vs KO Endoc 3min+Strip+ML141 10uM Dextran.lif - WT Control 11_serie_11_MAX-projection.tif:0517-0505	452.513	18.706	115.466	0	255	1.17035			10	Channel_C1-Cav1WT vs KO Endoc 3min+Strip+ML141 10uM Dextran.lif - KO Control 11_serie_26_MAX-projection.tif:0513-0577	666.131	14.214	126.148	0	255	0.98654
	11	Channel_C1-Cav1WT vs KO Endoc 3min+Strip+ML141 10uM Dextran.lif - WT Control 12_serie_12_MAX-projection.tif:0624-0484	433.322	15.565	82.089	0	255	0.973835			11	Channel_C1-Cav1WT vs KO Endoc 3min+Strip+ML141 10uM Dextran.lif - KO Control 12_serie_27_MAX-projection.tif:0498-0528	669.32	13.875	113.536	0	255	0.963011
	12	Channel_C1-Cav1WT vs KO Endoc 3min+Strip+ML141 10uM Dextran.lif - WT Control 13_serie_13_MAX-projection.tif:0492-0600	927.283	12.302	118.307	0	255	0.769683			12	Channel_C1-Cav1WT vs KO Endoc 3min+Strip+ML141 10uM Dextran.lif - KO Control 13_serie_28_MAX-projection.tif:0431-0544	574.093	18.809	109.3	0	255	1.30546
	13	Channel_C1-Cav1WT vs KO Endoc 3min+Strip+ML141 10uM Dextran.lif - WT Control 14_serie_14_MAX-projection.tif:0486-0556	397.288	17.005	86.886	0	255	1.06393			13	Channel_C1-Cav1WT vs KO Endoc 3min+Strip+ML141 10uM Dextran.lif - KO Control 14_serie_29_MAX-projection.tif:0456-0512	751.789	13.315	129.93	0	255	0.924144
	14	Channel_C1-Cav1WT vs KO Endoc 3min+Strip+ML141 10uM Dextran.lif - WT Control 15_serie_15_MAX-projection.tif:0547-0558	1063.08	18.188	148.301	0	255	1.13794			14	Channel_C1-Cav1WT vs KO Endoc 3min+Strip+ML141 10uM Dextran.lif - KO Control 15_serie_30_MAX-projection.tif:0493-0511	392.818	14.81	97.622	0	255	1.02791
	15	Channel_C1-Cav1WT vs KO Endoc 3min+Strip+ML141 10uM Dextran.lif - WT Control_serie_1_MAX-projection.tif:0507-0450	416.96	13.678	92.315	0	255	0.855774
			Average	15.9832				1					Average	14.4079				1
			SEM	0.802677				0.0502201					SEM	0.558656				0.0387742
			Average	16.0952				1					Average	17.6115				1
			SEM	0.112033				0					SEM	3.20354				0
	Cav1WT	Label	Area	Mean	Perimeter	MinThr	MaxThr				Cav1KO	Label	Area	Mean	Perimeter	MinThr	MaxThr
WT ML141-treated	1	Channel_C1-Cav1WT vs KO Endoc 3min+Strip+ML141 10uM.lif - WT+ML141 2_serie_32_MAX-projection.tif:0432-0463	315.332	15.173	82.064	0	255	0.936185		KO ML141-treated	1	Channel_C1-Cav1WT vs KO Endoc 3min+Strip+ML141 10uM.lif - KO+ML141 2_serie_47_MAX-projection.tif:0452-0529	521.394	16.773	117.951	0	0	0.805813
	2	Channel_C1-Cav1WT vs KO Endoc 3min+Strip+ML141 10uM.lif - WT+ML141 3_serie_33_MAX-projection.tif:0502-0530	633.199	13.178	118.168	0	255	0.813092			2	Channel_C1-Cav1WT vs KO Endoc 3min+Strip+ML141 10uM.lif - KO+ML141 3_serie_48_MAX-projection.tif:0493-0519	1179.42	12.631	172.272	0	0	0.606822
	3	Channel_C1-Cav1WT vs KO Endoc 3min+Strip+ML141 10uM.lif - WT+ML141 4_serie_34_MAX-projection.tif:0502-0486	378.942	15.838	73.56	0	255	0.977216			3	Channel_C1-Cav1WT vs KO Endoc 3min+Strip+ML141 10uM.lif - KO+ML141 4_serie_49_MAX-projection.tif:0493-0507	714.481	20.661	125.322	0	0	0.992601
	4	Channel_C1-Cav1WT vs KO Endoc 3min+Strip+ML141 10uM.lif - WT+ML141 5_serie_35_MAX-projection.tif:0419-0511	491.476	13.572	126.687	0	255	0.837402			4	Channel_C1-Cav1WT vs KO Endoc 3min+Strip+ML141 10uM.lif - KO+ML141 5_serie_50_MAX-projection.tif:0512-0511	548.316	19.994	143.019	0	0	0.960557
	5	Channel_C1-Cav1WT vs KO Endoc 3min+Strip+ML141 10uM.lif - WT+ML141 6_serie_36_MAX-projection.tif:0445-0508	463.524	13.881	82.163	0	255	0.856468			5	Channel_C1-Cav1WT vs KO Endoc 3min+Strip+ML141 10uM.lif - KO+ML141 6_serie_51_MAX-projection.tif:0443-0476	367.636	19.139	96.053	0	0	0.919481
	6	Channel_C1-Cav1WT vs KO Endoc 3min+Strip+ML141 10uM.lif - WT+ML141 7_serie_37_MAX-projection.tif:0445-0508	471.429	15.132	82.86	0	255	0.933655			6	Channel_C1-Cav1WT vs KO Endoc 3min+Strip+ML141 10uM.lif - KO+ML141 7_serie_52_MAX-projection.tif:0469-0570	540.815	23.037	132.961	0	0	1.10675
	7	Channel_C1-Cav1WT vs KO Endoc 3min+Strip+ML141 10uM.lif - WT+ML141 9_serie_39_MAX-projection.tif:0456-0601	454.415	17.896	103.505	0	255	1.1042			7	Channel_C1-Cav1WT vs KO Endoc 3min+Strip+ML141 10uM.lif - KO+ML141 8_serie_53_MAX-projection.tif:0464-0499	737.261	18.236	139.545	0	0	0.876099
	8	Channel_C1-Cav1WT vs KO Endoc 3min+Strip+ML141 10uM.lif - WT+ML141 10_serie_40_MAX-projection.tif:0545-0497	706.16	17.912	111.024	0	255	1.10518			8	Channel_C1-Cav1WT vs KO Endoc 3min+Strip+ML141 10uM.lif - KO+ML141 10_serie_55_MAX-projection.tif:0469-0480	406.733	19.467	96.543	0	0	0.935239
	9	Channel_C1-Cav1WT vs KO Endoc 3min+Strip+ML141 10uM.lif - WT+ML141 11_serie_41_MAX-projection.tif:0490-0494	1121.12	14.637	160.256	0	255	0.903113			9	Channel_C1-Cav1WT vs KO Endoc 3min+Strip+ML141 10uM.lif - KO+ML141 11_serie_56_MAX-projection.tif:0531-0508	1483.22	19.573	203.722	0	0	0.940331
	10	Channel_C1-Cav1WT vs KO Endoc 3min+Strip+ML141 10uM.lif - WT+ML141 12_serie_42_MAX-projection.tif:0416-0546	842.082	12.325	116.009	0	255	0.760461			10	Channel_C1-Cav1WT vs KO Endoc 3min+Strip+ML141 10uM.lif - KO+ML141 12_serie_57_MAX-projection.tif:0481-0498	857.811	16.595	150.111	0	255	0.797262
	11	Channel_C1-Cav1WT vs KO Endoc 3min+Strip+ML141 10uM.lif - WT+ML141 13_serie_43_MAX-projection.tif:0480-0508	454.195	17.254	115.154	0	255	1.06458			11	Channel_C1-Cav1WT vs KO Endoc 3min+Strip+ML141 10uM.lif - KO+ML141 13_serie_58_MAX-projection.tif:0456-0446	332.617	20.192	89.474	0	255	0.97007
	12	Channel_C1-Cav1WT vs KO Endoc 3min+Strip+ML141 10uM.lif - WT+ML141 14_serie_44_MAX-projection.tif:0513-0509	512.907	16.56	97.201	0	255	1.02176			12	Channel_C1-Cav1WT vs KO Endoc 3min+Strip+ML141 10uM.lif - KO+ML141 14_serie_59_MAX-projection.tif:0521-0554	510.759	20.864	124.467	0	255	1.00235
	13	Channel_C1-Cav1WT vs KO Endoc 3min+Strip+ML141 10uM.lif - WT+ML141 15_serie_45_MAX-projection.tif:0501-0547	425.032	18.627	107.748	0	255	1.1493			13	Channel_C1-Cav1WT vs KO Endoc 3min+Strip+ML141 10uM.lif - KO+ML141 15_serie_60_MAX-projection.tif:0512-0566	943.552	20.664	162.872	0	255	0.992746
	14	Channel_C1-Cav1WT vs KO Endoc 3min+Strip+ML141 10uM.lif - WT+ML141_serie_31_MAX-projection.tif:0512-0573	714.864	15.203	119.894	0	255	0.938036			14	Channel_C1-Cav1WT vs KO Endoc 3min+Strip+ML141 10uM.lif - KO+ML141_serie_46_MAX-projection.tif:0380-0513	870.011	14.266	160.393	0	255	0.685371
			Average	15.5134				0.95719					Average	18.7209				0.899393
			SEM	0.516404				0.0318625					SEM	0.746735				0.0358749
	1	Channel_C1-Cav1WT vs KO Endoc 3min+Strip+ML141 10uM Dextran.lif - WT+ML 2_serie_32_MAX-projection.tif:0438-0524	601.45	14.991	97.295	0	255	0.937922
	2	Channel_C1-Cav1WT vs KO Endoc 3min+Strip+ML141 10uM Dextran.lif - WT+ML 3_serie_33_MAX-projection.tif:0519-0567	411.034	14.715	105.844	0	255	0.920654			1	Channel_C1-Cav1WT vs KO Endoc 3min+Strip+ML141 10uM Dextran.lif - KO+ML 2_serie_47_MAX-projection.tif:0574-0644	331.569	9.926	102.256	0	255	0.688926
	3	Channel_C1-Cav1WT vs KO Endoc 3min+Strip+ML141 10uM Dextran.lif - WT+ML 4_serie_34_MAX-projection.tif:0527-0462	292.026	13.571	79.453	0	255	0.849079			2	Channel_C1-Cav1WT vs KO Endoc 3min+Strip+ML141 10uM Dextran.lif - KO+ML 3_serie_48_MAX-projection.tif:0510-0508	558.138	11.779	118.797	0	255	0.817536
	4	Channel_C1-Cav1WT vs KO Endoc 3min+Strip+ML141 10uM Dextran.lif - WT+ML 5_serie_35_MAX-projection.tif:0503-0507	523.186	14.034	97.513	0	255	0.878047			3	Channel_C1-Cav1WT vs KO Endoc 3min+Strip+ML141 10uM Dextran.lif - KO+ML 4_serie_49_MAX-projection.tif:0490-0481	548.594	10.038	103.686	0	255	0.6967
	5	Channel_C1-Cav1WT vs KO Endoc 3min+Strip+ML141 10uM Dextran.lif - WT+ML 6_serie_36_MAX-projection.tif:0473-0572	499.522	16.082	98.895	0	255	1.00618			4	Channel_C1-Cav1WT vs KO Endoc 3min+Strip+ML141 10uM Dextran.lif - KO+ML 5_serie_50_MAX-projection.tif:0488-0341	607.187	11.992	111.089	0	255	0.83232
	6	Channel_C1-Cav1WT vs KO Endoc 3min+Strip+ML141 10uM Dextran.lif - WT+ML 7_serie_37_MAX-projection.tif:0497-0504	607.801	15.672	91.841	0	255	0.98053			5	Channel_C1-Cav1WT vs KO Endoc 3min+Strip+ML141 10uM Dextran.lif - KO+ML 6_serie_51_MAX-projection.tif:0514-0533	631.599	12.981	111.41	0	255	0.900962
	7	Channel_C1-Cav1WT vs KO Endoc 3min+Strip+ML141 10uM Dextran.lif - WT+ML 8_serie_38_MAX-projection.tif:0655-0514	492.163	18.776	105.374	0	255	1.17473			6	Channel_C1-Cav1WT vs KO Endoc 3min+Strip+ML141 10uM Dextran.lif - KO+ML 7_serie_52_MAX-projection.tif:0431-0582	599.3	9.351	98.732	0	255	0.649018
	8	Channel_C1-Cav1WT vs KO Endoc 3min+Strip+ML141 10uM Dextran.lif - WT+ML 9_serie_39_MAX-projection.tif:0403-0520	649.979	17.13	117.609	0	255	1.07175			7	Channel_C1-Cav1WT vs KO Endoc 3min+Strip+ML141 10uM Dextran.lif - KO+ML 8_serie_53_MAX-projection.tif:0480-0542	436.304	14.873	83.272	0	255	1.03228
	9	Channel_C1-Cav1WT vs KO Endoc 3min+Strip+ML141 10uM Dextran.lif - WT+ML 11_serie_41_MAX-projection.tif:0391-0451	457.383	14.869	95.187	0	255	0.930289			8	Channel_C1-Cav1WT vs KO Endoc 3min+Strip+ML141 10uM Dextran.lif - KO+ML 9_serie_54_MAX-projection.tif:0426-0447	444.847	13.41	84.569	0	255	0.930738
	10	Channel_C1-Cav1WT vs KO Endoc 3min+Strip+ML141 10uM Dextran.lif - WT+ML 12_serie_42_MAX-projection.tif:0469-0388	228.123	17.656	60.006	0	255	1.10466			9	Channel_C1-Cav1WT vs KO Endoc 3min+Strip+ML141 10uM Dextran.lif - KO+ML 10_serie_55_MAX-projection.tif:0404-0492	425.861	13.372	86.387	0	255	0.9281
	11	Channel_C1-Cav1WT vs KO Endoc 3min+Strip+ML141 10uM Dextran.lif - WT+ML 13_serie_43_MAX-projection.tif:0654-0389	654.285	17.785	133.171	0	255	1.11273			10	Channel_C1-Cav1WT vs KO Endoc 3min+Strip+ML141 10uM Dextran.lif - KO+ML 11_serie_56_MAX-projection.tif:0475-0497	968.634	11.238	126.621	0	255	0.779987
	12	Channel_C1-Cav1WT vs KO Endoc 3min+Strip+ML141 10uM Dextran.lif - WT+ML 14_serie_44_MAX-projection.tif:0474-0528	320.127	16.045	68.961	0	255	1.00387			11	Channel_C1-Cav1WT vs KO Endoc 3min+Strip+ML141 10uM Dextran.lif - KO+ML 13_serie_58_MAX-projection.tif:0410-0438	326.99	13.991	83.414	0	255	0.971063
	13	Channel_C1-Cav1WT vs KO Endoc 3min+Strip+ML141 10uM Dextran.lif - WT+ML 15_serie_45_MAX-projection.tif:0378-0578	418.222	18.271	91.815	0	255	1.14314			12	Channel_C1-Cav1WT vs KO Endoc 3min+Strip+ML141 10uM Dextran.lif - KO+ML 14_serie_59_MAX-projection.tif:0466-0542	258.05	14.804	59.524	0	255	1.02749
	14	Channel_C1-Cav1WT vs KO Endoc 3min+Strip+ML141 10uM Dextran.lif - WT+ML_serie_31_MAX-projection.tif:0514-0537	778.659	13.933	107.509	0	255	0.871728			13	Channel_C1-Cav1WT vs KO Endoc 3min+Strip+ML141 10uM Dextran.lif - KO+ML 15_serie_60_MAX-projection.tif:0503-0475	541.318	16.305	115.185	0	255	1.13167
											14	Channel_C1-Cav1WT vs KO Endoc 3min+Strip+ML141 10uM Dextran.lif - KO+ML_serie_46_MAX-projection.tif:0387-0439	308.714	4.439	73.589	0	255	0.308094
			Average	15.9664				0.998951
			SEM	0.457872				0.0286471					Average	12.0356				0.835349
													SEM	0.799708				0.0555047
			Average	15.7399				0.97807					Average	15.3783				0.867371
			SEM	0.2265				0.0208805					SEM	3.34261				0.032022

## Sheet: ActB-Tnf Suppl. panel 3Q
Image File	Image Serie	Channels Analyzed (ch1 vs. ch2)	Pearson coeff.	Normalized by Cav1WT Mean Control	M1	M2	ICQ	Ch1 threshold range	Ch2 threshold range		Cav1WT Control		Average	SEM	Cav1KO Control		Average	SEM
Cav1WT_vs_KO_Endoc_3min+Strip_Tnf_568_Cav1_647_actBeta1_488.lif	Cav1WT_Tnf_568_Cav1_647_actBeta1_488	Ch_Reference_actBCh_AND_Ch_TNFCh	0.097	0.386839	0.392	0.806	0.173	0; 0	0; 0\n			ActBeta1 vs Tnf	0.25075	0.0336282		ActBeta1 vs Tnf	0.2627	0.0275888
Cav1WT_vs_KO_Endoc_3min+Strip_Tnf_568_Cav1_647_actBeta1_488.lif	Cav1WT_Tnf_568_Cav1_647_actBeta1_488_2	Ch_Reference_actBCh_AND_Ch_TNFCh	0.143	0.570289	0.343	0.819	0.212	0; 0	0; 0\n
Cav1WT_vs_KO_Endoc_3min+Strip_Tnf_568_Cav1_647_actBeta1_488.lif	Cav1WT_Tnf_568_Cav1_647_actBeta1_488_3	Ch_Reference_actBCh_AND_Ch_TNFCh	0.135	0.538385	0.401	0.813	0.188	0; 0	0; 0\n
Cav1WT_vs_KO_Endoc_3min+Strip_Tnf_568_Cav1_647_actBeta1_488.lif	Cav1WT_Tnf_568_Cav1_647_actBeta1_488_4	Ch_Reference_actBCh_AND_Ch_TNFCh	0.121	0.482552	0.437	0.808	0.186	0; 0	0; 0\n
Cav1WT_vs_KO_Endoc_3min+Strip_Tnf_568_Cav1_647_actBeta1_488.lif	Cav1WT_Tnf_568_Cav1_647_actBeta1_488_5	Ch_Reference_actBCh_AND_Ch_TNFCh	0.168	0.66999	0.236	0.833	0.207	0; 0	0; 0\n
Cav1WT_vs_KO_Endoc_3min+Strip_Tnf_568_Cav1_647_actBeta1_488.lif	Cav1WT_Tnf_568_Cav1_647_actBeta1_488_6	Ch_Reference_actBCh_AND_Ch_TNFCh	0.114	0.454636	0.318	0.824	0.186	0; 0	0; 0\n
Cav1WT_vs_KO_Endoc_3min+Strip_Tnf_568_Cav1_647_actBeta1_488.lif	Cav1WT_Tnf_568_Cav1_647_actBeta1_488_7	Ch_Reference_actBCh_AND_Ch_TNFCh	0.1	0.398804	0.35	0.795	0.195	0; 0	0; 0\n
Cav1WT_vs_KO_Endoc_3min+Strip_Tnf_568_Cav1_647_actBeta1_488.lif	Cav1WT_Tnf_568_Cav1_647_actBeta1_488_8	Ch_Reference_actBCh_AND_Ch_TNFCh	0.118	0.470588	0.307	0.865	0.246	0; 0	0; 0\n
Cav1WT_vs_KO_Endoc_3min+Strip_Tnf_568_Cav1_647_actBeta1_488.lif	Cav1WT_Tnf_568_Cav1_647_actBeta1_488_9	Ch_Reference_actBCh_AND_Ch_TNFCh	0.077	0.307079	0.305	0.853	0.238	0; 0	0; 0\n
Cav1WT_vs_KO_Endoc_3min+Strip_Tnf_568_Cav1_647_actBeta1_488.lif	Cav1WT_Tnf_568_Cav1_647_actBeta1_488_10	Ch_Reference_actBCh_AND_Ch_TNFCh	0.157	0.626122	0.34	0.888	0.248	0; 0	0; 0\n
Cav1WT_vs_KO_Endoc_3min+Strip_Tnf_568_Cav1_647_actBeta1_488.lif	Cav1WT_Tnf_568_Cav1_647_actBeta1_488_11	Ch_Reference_actBCh_AND_Ch_TNFCh	0.114	0.454636	0.234	0.901	0.215	0; 0	0; 0\n
Cav1WT_vs_KO_Endoc_3min+Strip_Tnf_568_Cav1_647_actBeta1_488.lif	Cav1WT_Tnf_568_Cav1_647_actBeta1_488_12	Ch_Reference_actBCh_AND_Ch_TNFCh	0.372	1.48355	0.204	0.872	0.201	0; 0	0; 0\n										Cav1WT
Cav1WT_vs_KO_Endoc_3min+Strip_Tnf_568_Cav1_647_actBeta1_488.lif	Cav1WT_Tnf_568_Cav1_647_actBeta1_488_13	Ch_Reference_actBCh_AND_Ch_TNFCh	0.364	1.45165	0.541	0.901	0.328	0; 0	0; 0\n										Cav1KO
Cav1WT_vs_KO_Endoc_3min+Strip_Tnf_568_Cav1_647_actBeta1_488.lif	Cav1WT_Tnf_568_Cav1_647_actBeta1_488_14	Ch_Reference_actBCh_AND_Ch_TNFCh	0.354	1.41176	0.67	0.914	0.365	0; 0	0; 0\n
Cav1WT_vs_KO_Endoc_3min+Strip_Tnf_568_Cav1_647_actBeta1_488.lif	Cav1WT_Tnf_568_Cav1_647_actBeta1_488_15	Ch_Reference_actBCh_AND_Ch_TNFCh	0.454	1.81057	0.643	0.911	0.381	0; 0	0; 0\n
Cav1WT_vs_KO_Endoc_3min+Strip_Tnf_568_Cav1_647_actBeta1_488.lif	Cav1WT_Tnf_568_Cav1_647_actBeta1_488_16	Ch_Reference_actBCh_AND_Ch_TNFCh	0.353	1.40778	0.611	0.872	0.259	0; 0	0; 0\n
Cav1WT_vs_KO_Endoc_3min+Strip_Tnf_568_Cav1_647_actBeta1_488.lif	Cav1WT_Tnf_568_Cav1_647_actBeta1_488_17	Ch_Reference_actBCh_AND_Ch_TNFCh	0.434	1.73081	0.817	0.849	0.379	0; 0	0; 0\n
Cav1WT_vs_KO_Endoc_3min+Strip_Tnf_568_Cav1_647_actBeta1_488.lif	Cav1WT_Tnf_568_Cav1_647_actBeta1_488_18	Ch_Reference_actBCh_AND_Ch_TNFCh	0.478	1.90628	0.794	0.85	0.396	0; 0	0; 0\n
Cav1WT_vs_KO_Endoc_3min+Strip_Tnf_568_Cav1_647_actBeta1_488.lif	Cav1WT_Tnf_568_Cav1_647_actBeta1_488_19	Ch_Reference_actBCh_AND_Ch_TNFCh	0.447	1.78265	0.781	0.826	0.388	0; 0	0; 0\n
Cav1WT_vs_KO_Endoc_3min+Strip_Tnf_568_Cav1_647_actBeta1_488.lif	Cav1WT_Tnf_568_Cav1_647_actBeta1_488_20	Ch_Reference_actBCh_AND_Ch_TNFCh	0.415	1.65503	0.829	0.863	0.353	0; 0	0; 0\n
Cav1WT_vs_KO_Endoc_3min+Strip_Tnf_568_Cav1_647_actBeta1_488.lif	Cav1KO_Tnf_568_Cav1_647_actBeta1_488	Ch_Reference_actBCh_AND_Ch_TNFCh	0.105	0.418744	0.451	0.926	0.306	0; 0	0; 0\n
Cav1WT_vs_KO_Endoc_3min+Strip_Tnf_568_Cav1_647_actBeta1_488.lif	Cav1KO_Tnf_568_Cav1_647_actBeta1_488_2	Ch_Reference_actBCh_AND_Ch_TNFCh	0.211	0.841476	0.186	0.868	-0.026	0; 0	0; 0\n
Cav1WT_vs_KO_Endoc_3min+Strip_Tnf_568_Cav1_647_actBeta1_488.lif	Cav1KO_Tnf_568_Cav1_647_actBeta1_488_3	Ch_Reference_actBCh_AND_Ch_TNFCh	0.267	1.06481	0.294	0.897	0.267	0; 0	0; 0\n			Normalized by Cav1WT Mean Control
Cav1WT_vs_KO_Endoc_3min+Strip_Tnf_568_Cav1_647_actBeta1_488.lif	Cav1KO_Tnf_568_Cav1_647_actBeta1_488_4	Ch_Reference_actBCh_AND_Ch_TNFCh	0.207	0.825523	0.419	0.903	0.184	0; 0	0; 0\n		Cav1WT Control		Average	SEM	Cav1KO Control		Average	SEM
Cav1WT_vs_KO_Endoc_3min+Strip_Tnf_568_Cav1_647_actBeta1_488.lif	Cav1KO_Tnf_568_Cav1_647_actBeta1_488_5	Ch_Reference_actBCh_AND_Ch_TNFCh	0.265	1.05683	0.377	0.898	0.174	0; 0	0; 0\n			ActBeta1 vs Tnf	1	0.134111		ActBeta1 vs Tnf	1.04766	0.110025
Cav1WT_vs_KO_Endoc_3min+Strip_Tnf_568_Cav1_647_actBeta1_488.lif	Cav1KO_Tnf_568_Cav1_647_actBeta1_488_6	Ch_Reference_actBCh_AND_Ch_TNFCh	0.218	0.869392	0.45	0.917	0.126	0; 0	0; 0\n
Cav1WT_vs_KO_Endoc_3min+Strip_Tnf_568_Cav1_647_actBeta1_488.lif	Cav1KO_Tnf_568_Cav1_647_actBeta1_488_7	Ch_Reference_actBCh_AND_Ch_TNFCh	0.222	0.885344	0.506	0.899	0.137	0; 0	0; 0\n
Cav1WT_vs_KO_Endoc_3min+Strip_Tnf_568_Cav1_647_actBeta1_488.lif	Cav1KO_Tnf_568_Cav1_647_actBeta1_488_8	Ch_Reference_actBCh_AND_Ch_TNFCh	0.239	0.953141	0.522	0.934	0.208	0; 0	0; 0\n
Cav1WT_vs_KO_Endoc_3min+Strip_Tnf_568_Cav1_647_actBeta1_488.lif	Cav1KO_Tnf_568_Cav1_647_actBeta1_488_9	Ch_Reference_actBCh_AND_Ch_TNFCh	0.12	0.478564	0.166	0.848	0.151	0; 0	0; 0\n
Cav1WT_vs_KO_Endoc_3min+Strip_Tnf_568_Cav1_647_actBeta1_488.lif	Cav1KO_Tnf_568_Cav1_647_actBeta1_488_10	Ch_Reference_actBCh_AND_Ch_TNFCh	0.207	0.825523	0.299	0.91	0.141	0; 0	0; 0\n
Cav1WT_vs_KO_Endoc_3min+Strip_Tnf_568_Cav1_647_actBeta1_488.lif	Cav1KO_Tnf_568_Cav1_647_actBeta1_488_11	Ch_Reference_actBCh_AND_Ch_TNFCh	0.131	0.522433	0.347	0.88	0.125	0; 0	0; 0\n
Cav1WT_vs_KO_Endoc_3min+Strip_Tnf_568_Cav1_647_actBeta1_488.lif	Cav1KO_Tnf_568_Cav1_647_actBeta1_488_12	Ch_Reference_actBCh_AND_Ch_TNFCh	0.426	1.6989	0.908	0.86	0.382	0; 0	0; 0\n
Cav1WT_vs_KO_Endoc_3min+Strip_Tnf_568_Cav1_647_actBeta1_488.lif	Cav1KO_Tnf_568_Cav1_647_actBeta1_488_13	Ch_Reference_actBCh_AND_Ch_TNFCh	0.487	1.94217	0.903	0.832	0.376	0; 0	0; 0\n
Cav1WT_vs_KO_Endoc_3min+Strip_Tnf_568_Cav1_647_actBeta1_488.lif	Cav1KO_Tnf_568_Cav1_647_actBeta1_488_14	Ch_Reference_actBCh_AND_Ch_TNFCh	0.513	2.04586	0.881	0.808	0.397	0; 0	0; 0\n
Cav1WT_vs_KO_Endoc_3min+Strip_Tnf_568_Cav1_647_actBeta1_488.lif	Cav1KO_Tnf_568_Cav1_647_actBeta1_488_15	Ch_Reference_actBCh_AND_Ch_TNFCh	0.47	1.87438	0.916	0.884	0.363	0; 0	0; 0\n
Cav1WT_vs_KO_Endoc_3min+Strip_Tnf_568_Cav1_647_actBeta1_488.lif	Cav1KO_Tnf_568_Cav1_647_actBeta1_488_16	Ch_Reference_actBCh_AND_Ch_TNFCh	0.274	1.09272	0.921	0.889	0.315	0; 0	0; 0\n
Cav1WT_vs_KO_Endoc_3min+Strip_Tnf_568_Cav1_647_actBeta1_488.lif	Cav1KO_Tnf_568_Cav1_647_actBeta1_488_17	Ch_Reference_actBCh_AND_Ch_TNFCh	0.314	1.25224	0.937	0.904	0.3	0; 0	0; 0\n
Cav1WT_vs_KO_Endoc_3min+Strip_Tnf_568_Cav1_647_actBeta1_488.lif	Cav1KO_Tnf_568_Cav1_647_actBeta1_488_18	Ch_Reference_actBCh_AND_Ch_TNFCh	0.196	0.781655	0.87	0.824	0.302	0; 0	0; 0\n
Cav1WT_vs_KO_Endoc_3min+Strip_Tnf_568_Cav1_647_actBeta1_488.lif	Cav1KO_Tnf_568_Cav1_647_actBeta1_488_19	Ch_Reference_actBCh_AND_Ch_TNFCh	0.273	1.08873	0.898	0.866	0.328	0; 0	0; 0\n
Cav1WT_vs_KO_Endoc_3min+Strip_Tnf_568_Cav1_647_actBeta1_488.lif	Cav1KO_Tnf_568_Cav1_647_actBeta1_488_20	Ch_Reference_actBCh_AND_Ch_TNFCh	0.109	0.434696	0.815	0.786	0.236	0; 0	0; 0\n
