# Supplementary material for: Caveolae couple mechanical stress to integrin recycling and activation
Source: eLife. 2022 Oct 20;11:e82348. doi: 10.7554/eLife.82348 (PMC9747151; doi:10.7554/eLife.82348)
Supplement: Figure 5—source data 1. [file elife-82348-fig5-data1.xlsx]

## Sheet: Endocytosis ML141 Figure 5A
	Normalized by timepoint Total
	1	0.239331	0.49827	0.555363	0.575548	1	0.339215	0.455891	0.454752	0.426295
	1	0.217457	0.526236	0.584258	0.641271	1	0.310797	0.448032	0.531282	0.573663
	Normalized by timepoint Total
	1	0.209086	0.425835	0.57526	0.639299	1	0.288462	0.421474	0.532585	0.563568
	1	0.11479	0.523179	0.637969	0.645143	1	0.29893	0.482888	0.540642	0.590909
	Normalized by timepoint Total
	1	0.357553	0.507648	0.594646	0.64914	1	0.467375	0.454729	0.594335	0.591806
	1	0.36871	0.633577	0.694876	0.675663	1	0.472019	0.505109	0.585401	0.692457
	Normalized by timepoint Total
	1	0.170696	0.380952	0.447619	0.487912	1	0.13785	0.380062	-	0.483645
	1	0.128676	0.311029	0.421324	0.424265	1	0.145617	0.330609	0.269688	0.317979
	Cav1WT					Cav1WT+ML141
	Total	0min	2min	5min	10min	Total	0min	2min	5min	10min
	Average
	1	0.244166	0.453176	0.543222	0.587975	1	0.308225	0.428039	0.527224	0.516328
	1	0.207408	0.498505	0.584607	0.596586	1	0.306841	0.44166	0.481753	0.543752
	1	0.225787	0.475841	0.563915	0.59228	1	0.307533	0.434849	0.504489	0.53004
	0	0.0335694	0.0353158	0.032197	0.0319019	0	0.0441318	0.0199564	0.0395192	0.0411469
WT	0.034		0.035			0.032					0.032
	0.225787		0.475841			0.563915					0.59228
	0min		2min			5min					10min
WT+ML141	0.044		0.02			0.04					0.041
	0.307533		0.434849			0.504489					0.53004
	0min		2min			5min					10min

## Sheet: Endocytosis ML141 Figure 5B
	Normalized by timepoint Total
						1	0.245024	0.2186	0.13315	0.254633
	1	0.121284	0.334459	0.435811	0.439189	1	0.172474	0.249129	0.238328	0.256446
	Normalized by timepoint Total
	1	0.22191	0.598876	0.729213	0.783146
	1	0.147368	0.366243	0.529946	0.488203	1	0.167594	0.31739	0.472377	0.456433
	Normalized by timepoint Total
	1	0.165502	0.369432	0.451965	0.504367	1	0.165186	0.324313	0.430937	0.464863
	1	0.157324	0.233635	0.320796	0.36745	1	0.121397	0.201794	0.322229	0.295964
	Normalized by timepoint Total
	0.999858	0.162764	0.332482	0.407407	0.408826	0.999877	0.186953	0.279689	0.273153	0.351708
	0.99991	0.142327	0.322476	0.42861	0.424267	0.999821	0.150752	0.274543	0.3677	0.365281
	Cav1KO					Cav1KO+ML141
	Total	0min	2min	5min	10min	Total	0min	2min	5min	10min
	Average
	0.999953	0.183392	0.433597	0.529529	0.565446	0.999959	0.199054	0.274201	0.27908	0.357068
	0.999977	0.142076	0.314203	0.428791	0.429777	0.999955	0.153054	0.260714	0.350158	0.343531
	0.999965	0.162734	0.3739	0.47916	0.497612	0.999957	0.176054	0.267457	0.314619	0.350299
	2.07209e-05	0.0110382	0.0397318	0.0456767	0.0488672	2.67052e-05	0.0134088	0.0164278	0.0412268	0.0307957
KO	0.0110382		0.0397318			0.0456767					0.0488672
	0.162734		0.3739			0.47916					0.497612
	0min		2min			5min					10min
KO+ML141	0.0134088		0.0164278			0.0412268					0.0307957
	0.176054		0.267457			0.314619					0.350299
	0min		2min			5min					10min

## Sheet: Colocalization Figure 5G and 5H
			Image Number	Pearson Correlation	Normalized to Mean of Cav1WT		Image Number	Pearson Correlation	Normalized to Mean of Cav1WT
		Cav1WT	1	0.35	1.29098	Cav1KO	1	0.44	1.62295
			2	0.41	1.5123		2	0.36	1.32787
			3	0.23	0.848361		3	0.41	1.5123
			4	0.33	1.21721		4	0.3	1.10656
			5	0.18	0.663934		5	0.29	1.06967
			6	0.11	0.405738		6	0.33	1.21721
			7	0.3	1.10656		7	0.41	1.5123
			8	0.24	0.885246		8	0.35	1.29098
			9	0.41	1.5123		9	0.57	2.10246
			10	0.19	0.70082		10	0.45	1.65984
			11	0.32	1.18033		11	0.18	0.663934
			12	0.5	1.84426		12	0.41	1.5123
			13	0.15	0.553279		13	0.41	1.5123
			14	0.15	0.553279		14	0.43	1.58607
			15	0.14	0.516393		15	0.22	0.811475
			16	0.14	0.516393		16	0.36	1.32787
			17	0.33	1.21721		17	0.46	1.69672
			18	0.4	1.47541		18	0.32	1.18033
							19	0.4	1.47541
							20	0.36	1.32787
				Cav1WT				Cav1KO
			Average	0.271111	1		Average	0.373	1.37582
			SEM	0.027486	0.101383		SEM	0.0195219	0.0720071
			Image Number	Spearman Correlation	Normalized to Mean of Cav1WT		Image Number	Spearman Correlation	Normalized to Mean of Cav1WT
		Cav1WT	1	0.114497	0.6586	Cav1KO	1	0.17708	1.01859
			2	0.3789	2.17949		2	0.343332	1.97489
			3	0.256121	1.47324		3	0.330692	1.90219
			4	0.288624	1.6602		4	0.401252	2.30806
			5	0.0250114	0.143869		5	0.302279	1.73875
			6	0.19619	1.12851		6	0.483529	2.78132
			7	0.0921281	0.529934		7	0.162455	0.934463
			8	0.234123	1.34671		8	0.404512	2.32681
			9	0.129065	0.742402		9	0.173426	0.997571
			10	0.161202	0.927258		10	0.219508	1.26264
			11	0.253844	1.46014		11	0.247082	1.42125
			12	0.155639	0.895257		12	0.254813	1.46572
			13	0.145142	0.834875		13	0.311696	1.79292
			14	0.154542	0.888945		14	0.31545	1.81451
			15	0.140874	0.810326		15	0.342875	1.97226
			16	0.149825	0.861815		16	0.246188	1.41611
			17	0.140035	0.805499		17	0.400094	2.3014
			18	0.113509	0.652922		18	0.262608	1.51056
							19	0.327884	1.88603
							20	0.36361	2.09154
				Cav1WT				Cav1KO
			Average	0.173848	1		Average	0.303518	1.74588
			SEM	0.0193873	0.111518		SEM	0.0192049	0.110469
