# Supplementary material for: Caveolae couple mechanical stress to integrin recycling and activation
Source: eLife. 2022 Oct 20;11:e82348. doi: 10.7554/eLife.82348 (PMC9747151; doi:10.7554/eLife.82348)
Supplement: Figure 6—figure supplement 1—source data 1. [file elife-82348-fig6-figsupp1-data1.xlsx]

## Sheet: 9EG7 siHOOK1 panel 4A
		2019-05-11
			9EG7 (act beta1)
		Cav1KO	1
		Cav1KO+siRNA HOOK1 72h	0.927574
		2019-08-11
			9EG7 (act beta1)
		Cav1KO 1	0.999275
		Cav1KO+siRNA HOOK1 72h	1.02681
		2019-08-11
			9EG7 (act beta1)
		Cav1KO 2	0.999241
		Cav1KO+siRNA HOOK1 72h	1.041
		2019-09-11
			9EG7 (act beta1)
		Cav1KO 3	0.999189
		Cav1KO+siRNA HOOK1 72h	1.07461
		2019-09-11
			9EG7 (act beta1)
		Cav1KO 4	1
		Cav1KO+siRNA HOOK1 72h	0.902458
			9EG7 (act beta1)
		Cav1KO	0.999541
		SEM	0.000187887
		Cav1KO+siRNA HOOK1 72h	0.994492
		SEM	0.0335974

## Sheet: 9EG7 Rab11DN panel 4B
		2019-03-12	9EG7		2019-03-12
			1.00061			9EG7
		Cav1KO	0.755027		Cav1WT	1
		Cav1KO+DN Rab11 124I			Cav1WT+DN Rab11 124I	1.02661
		2019-03-12	9EG7		2019-03-12
			1			9EG7
		Cav1KO	0.970183		Cav1WT	1
		Cav1KO+DN Rab11 124I			Cav1WT+DN Rab11 124I	0.864701
		2019-04-12	9EG7		2019-04-12
			0.999392			9EG7
		Cav1KO	0.993917		Cav1WT	1.00063
		Cav1KO+DN Rab11 124I			Cav1WT+DN Rab11 124I	0.996837
		2019-04-12	9EG7		2019-04-12
			0.999378			9EG7
		Cav1KO	1.04726		Cav1WT	1
		Cav1KO+DN Rab11 124I			Cav1WT+DN Rab11 124I	0.968434
		2019-10-12	9EG7		2019-10-12
			0.999419			9EG7
		Cav1KO	0.994193		Cav1WT	1
		Cav1KO+DN Rab11 124I			Cav1WT+DN Rab11 124I	1.01083
		2019-10-12	9EG7		2019-10-12
			0.999427			9EG7
		Cav1KO	1.02005		Cav1WT	1.00056
		Cav1KO+DN Rab11 124I			Cav1WT+DN Rab11 124I	0.928094
		20/12/2019	9EG7		20/12/2019
			1			9EG7
		Cav1KO	1.16583		Cav1WT	1.0005
		Cav1KO+DN Rab11 124I			Cav1WT+DN Rab11 124I	1.00752
		20/12/2019	9EG7		20/12/2019
			1			9EG7
		Cav1KO	1.04924		Cav1WT	1
		Cav1KO+DN Rab11 124I			Cav1WT+DN Rab11 124I	0.988642
		27/12/2019	9EG7		27/12/2019
			0.999564			9EG7
		Cav1KO	0.989965		Cav1WT	1
		Cav1KO+DN Rab11 124I			Cav1WT+DN Rab11 124I	0.985654
		27/12/2019	9EG7		27/12/2019
			1			9EG7
		Cav1KO	0.981558		Cav1WT	0.999563
		Cav1KO+DN Rab11 124I			Cav1WT+DN Rab11 124I	0.983377
		27/12/2019	9EG7		27/12/2019
			1.00043			9EG7
		Cav1KO	0.968923		Cav1WT	1
		Cav1KO+DN Rab11 124I			Cav1WT+DN Rab11 124I	0.884524
		27/12/2019	9EG7		27/12/2019
			0.99959			9EG7
		Cav1KO	0.938984		Cav1WT	0.999608
		Cav1KO+DN Rab11 124I			Cav1WT+DN Rab11 124I	0.947904
			9EG7
			0.999817			9EG7
		Cav1KO	0.000120962		Cav1WT	1.00008
		SEM	0.987877		SEM	8.99095e-05
		Cav1KO+DN Rab11 124I	0.0271588		Cav1WT+DN Rab11 124I	0.966093
		SEM			SEM	0.0146236

## Sheet: 9EG7 Rab4DN panel 4C
	2019-04-11
		9EG7		2019-12-11
	Cav1KO	1			9EG7
	Cav1KO+DN Rab4	0.696241		Cav1WT	1.00081
				Cav1WT+DN Rab4	1.04238
	2019-12-11
		9EG7		12/11/2019 Second
	Cav1KO	1.00069			9EG7
	Cav1KO+DN Rab4	0.829218		Cav1WT	1.0008
				Cav1WT+DN Rab4	1.17624
	12/11/2019 Second
		9EG7		12/11/2019 Third
	Cav1KO	1.00066			9EG7
	Cav1KO+DN Rab4	0.850232		Cav1WT	0.999272
				Cav1WT+DN Rab4	0.850073
	12/11/2019 Third
		9EG7		12/11/2019 Fourth
	Cav1KO	1			9EG7
	Cav1KO+DN Rab4	0.919738		Cav1WT	0.999234
				Cav1WT+DN Rab4	1.06207
	12/11/2019 Fourth
		9EG7		17/11/2019 FIRST
	Cav1KO	1			9EG7
	Cav1KO+DN Rab4	1.03897		Cav1WT	0.999371
				Cav1WT+DN Rab4	1.01824
	17/11/2019 FIRST
		9EG7		17/11/2019 SECOND
	Cav1KO	1.00063			9EG7
	Cav1KO+DN Rab4	0.893939		Cav1WT	1.0006
				Cav1WT+DN Rab4	0.904167
	17/11/2019 SECOND
		9EG7		21/11/2019 FIRST
	Cav1KO	1.00055			9EG7
	Cav1KO+DN Rab4	0.921763		Cav1WT	1.00072
				Cav1WT+DN Rab4	1.09247
	21/11/2019 FIRST
		9EG7		21/11/2019 SECOND
	Cav1KO	0.999234			9EG7
	Cav1KO+DN Rab4	1.02759		Cav1WT	1.00067
				Cav1WT+DN Rab4	0.960349
	21/11/2019 SECOND
		9EG7		29/11/2019 FIRST
	Cav1KO	1.0007			9EG7
	Cav1KO+DN Rab4	0.942456		Cav1WT	1.00103
				Cav1WT+DN Rab4	0.864198
	29/11/2019 FIRST
		9EG7		29/11/2019 SECOND
	Cav1KO	0.999061			9EG7
	Cav1KO+DN Rab4	0.909859		Cav1WT	1
				Cav1WT+DN Rab4	1.00224
	29/11/2019 SECOND				9EG7
		9EG7		Cav1WT	1.00025
	Cav1KO	1.00086		SEM	0.000225208
	Cav1KO+DN Rab4	0.822971		Cav1WT+DN Rab4	0.997242
				SEM	0.0328629
		9EG7
	Cav1KO	1.00022
	SEM	0.000177929
	Cav1KO+Rab4 DN S22N	0.895725
	SEM	0.027858
