# Supplementary material for: Caveolae couple mechanical stress to integrin recycling and activation
Source: eLife. 2022 Oct 20;11:e82348. doi: 10.7554/eLife.82348 (PMC9747151; doi:10.7554/eLife.82348)
Supplement: Figure 6—source data 1. [file elife-82348-fig6-data1.xlsx]

## Sheet: Colocalization 48h Figure 6E
Image	Pearson Coefficient	Normalized by Mean Control		Image	Pearson Coefficient	Normalized by Mean Control
C1-Cav1KO_Control_48h_CD147-488_EEA-1_647.lsm-crop and C2-Cav1KO_Control_48h_CD147-488_EEA-1_647.lsm-crop x 0 y0 w512 h512	0.226	1.33202		C1-Cav1KO_Control_48h_9EG7-488_EEA-1_647.lsm-crop and C2-Cav1KO_Control_48h_9EG7-488_EEA-1_647.lsm-crop x 0 y0 w439 h241	0.165	0.775923
C1-Cav1KO_Control_48h_CD147-488_EEA-1_647_10.lsm-crop and C2-Cav1KO_Control_48h_CD147-488_EEA-1_647_10.lsm-crop x 0 y0 w512 h512	0.158	0.931238		C1-Cav1KO_Control_48h_9EG7-488_EEA-1_647_10.lsm-crop and C2-Cav1KO_Control_48h_9EG7-488_EEA-1_647_10.lsm-crop x 0 y0 w307 h239	0.417	1.96097
C1-Cav1KO_Control_48h_CD147-488_EEA-1_647_2.lsm-crop and C2-Cav1KO_Control_48h_CD147-488_EEA-1_647_2.lsm-crop x 0 y0 w512 h512	0.265	1.56189		C1-Cav1KO_Control_48h_9EG7-488_EEA-1_647_11.lsm-crop and C2-Cav1KO_Control_48h_9EG7-488_EEA-1_647_11.lsm-crop x 0 y0 w263 h230	0.196	0.921702
C1-Cav1KO_Control_48h_CD147-488_EEA-1_647_3.lsm-crop and C2-Cav1KO_Control_48h_CD147-488_EEA-1_647_3.lsm-crop x 0 y0 w512 h512	0.16	0.943026		C1-Cav1KO_Control_48h_9EG7-488_EEA-1_647_12.lsm-crop and C2-Cav1KO_Control_48h_9EG7-488_EEA-1_647_12.lsm-crop x 0 y0 w279 h143	0.131	0.616036
C1-Cav1KO_Control_48h_CD147-488_EEA-1_647_4.lsm-crop and C2-Cav1KO_Control_48h_CD147-488_EEA-1_647_4.lsm-crop x 0 y0 w512 h512	0.204	1.20236		C1-Cav1KO_Control_48h_9EG7-488_EEA-1_647_13.lsm-crop and C2-Cav1KO_Control_48h_9EG7-488_EEA-1_647_13.lsm-crop x 0 y0 w311 h249	0.329	1.54714
C1-Cav1KO_Control_48h_CD147-488_EEA-1_647_5.lsm-crop and C2-Cav1KO_Control_48h_CD147-488_EEA-1_647_5.lsm-crop x 0 y0 w512 h512	0.118	0.695481		C1-Cav1KO_Control_48h_9EG7-488_EEA-1_647_14.lsm-crop and C2-Cav1KO_Control_48h_9EG7-488_EEA-1_647_14.lsm-crop x 0 y0 w238 h230	0.29	1.36374
C1-Cav1KO_Control_48h_CD147-488_EEA-1_647_6.lsm-crop and C2-Cav1KO_Control_48h_CD147-488_EEA-1_647_6.lsm-crop x 0 y0 w512 h512	0.103	0.607073		C1-Cav1KO_Control_48h_9EG7-488_EEA-1_647_15.lsm-crop and C2-Cav1KO_Control_48h_9EG7-488_EEA-1_647_15.lsm-crop x 0 y0 w281 h241	0.282	1.32612
C1-Cav1KO_Control_48h_CD147-488_EEA-1_647_7.lsm-crop and C2-Cav1KO_Control_48h_CD147-488_EEA-1_647_7.lsm-crop x 0 y0 w512 h512	0.264	1.55599		C1-Cav1KO_Control_48h_9EG7-488_EEA-1_647_16.lsm-crop and C2-Cav1KO_Control_48h_9EG7-488_EEA-1_647_16.lsm-crop x 0 y0 w283 h229	0.103	0.484364
C1-Cav1KO_Control_48h_CD147-488_EEA-1_647_8.lsm-crop and C2-Cav1KO_Control_48h_CD147-488_EEA-1_647_8.lsm-crop x 0 y0 w512 h512	0.125	0.736739		C1-Cav1KO_Control_48h_9EG7-488_EEA-1_647_17.lsm-crop and C2-Cav1KO_Control_48h_9EG7-488_EEA-1_647_17.lsm-crop x 0 y0 w309 h177	0.228	1.07218
C1-Cav1KO_Control_48h_CD147-488_EEA-1_647_9.lsm-crop and C2-Cav1KO_Control_48h_CD147-488_EEA-1_647_9.lsm-crop x 0 y0 w512 h512	0.093	0.548134		C1-Cav1KO_Control_48h_9EG7-488_EEA-1_647_18.lsm-crop and C2-Cav1KO_Control_48h_9EG7-488_EEA-1_647_18.lsm-crop x 0 y0 w338 h228	0.252	1.18505
C1-Cav1KO_Control_48h_CD147-488_EEA-1_647.lsm-crop and C2-Cav1KO_Control_48h_CD147-488_EEA-1_647.lsm-crop x 0 y0 w361 h143	0.108	0.636542		C1-Cav1KO_Control_48h_9EG7-488_EEA-1_647_19.lsm-crop and C2-Cav1KO_Control_48h_9EG7-488_EEA-1_647_19.lsm-crop x 0 y0 w186 h162	0.231	1.08629
C1-Cav1KO_Control_48h_CD147-488_EEA-1_647_10.lsm-crop and C2-Cav1KO_Control_48h_CD147-488_EEA-1_647_10.lsm-crop x 0 y0 w252 h141	0.109	0.642436		C1-Cav1KO_Control_48h_9EG7-488_EEA-1_647_2.lsm-crop and C2-Cav1KO_Control_48h_9EG7-488_EEA-1_647_2.lsm-crop x 0 y0 w197 h194	0.1	0.470256
C1-Cav1KO_Control_48h_CD147-488_EEA-1_647_11.lsm-crop and C2-Cav1KO_Control_48h_CD147-488_EEA-1_647_11.lsm-crop x 0 y0 w325 h197	0.136	0.801572		C1-Cav1KO_Control_48h_9EG7-488_EEA-1_647_20.lsm-crop and C2-Cav1KO_Control_48h_9EG7-488_EEA-1_647_20.lsm-crop x 0 y0 w541 h354	0.263	1.23677
C1-Cav1KO_Control_48h_CD147-488_EEA-1_647_12.lsm-crop and C2-Cav1KO_Control_48h_CD147-488_EEA-1_647_12.lsm-crop x 0 y0 w233 h191	0.098	0.577603		C1-Cav1KO_Control_48h_9EG7-488_EEA-1_647_3.lsm-crop and C2-Cav1KO_Control_48h_9EG7-488_EEA-1_647_3.lsm-crop x 0 y0 w298 h242	0.123	0.578415
C1-Cav1KO_Control_48h_CD147-488_EEA-1_647_13.lsm-crop and C2-Cav1KO_Control_48h_CD147-488_EEA-1_647_13.lsm-crop x 0 y0 w314 h224	0.06	0.353635		C1-Cav1KO_Control_48h_9EG7-488_EEA-1_647_4.lsm-crop and C2-Cav1KO_Control_48h_9EG7-488_EEA-1_647_4.lsm-crop x 0 y0 w277 h186	0.18	0.846461
C1-Cav1KO_Control_48h_CD147-488_EEA-1_647_14.lsm-crop and C2-Cav1KO_Control_48h_CD147-488_EEA-1_647_14.lsm-crop x 0 y0 w616 h251	0.185	1.09037		C1-Cav1KO_Control_48h_9EG7-488_EEA-1_647_5.lsm-crop and C2-Cav1KO_Control_48h_9EG7-488_EEA-1_647_5.lsm-crop x 0 y0 w231 h158	0.141	0.663061
C1-Cav1KO_Control_48h_CD147-488_EEA-1_647_15.lsm-crop and C2-Cav1KO_Control_48h_CD147-488_EEA-1_647_15.lsm-crop x 0 y0 w240 h148	0.182	1.07269		C1-Cav1KO_Control_48h_9EG7-488_EEA-1_647_6.lsm-crop and C2-Cav1KO_Control_48h_9EG7-488_EEA-1_647_6.lsm-crop x 0 y0 w396 h298	0.247	1.16153
C1-Cav1KO_Control_48h_CD147-488_EEA-1_647_16.lsm-crop and C2-Cav1KO_Control_48h_CD147-488_EEA-1_647_16.lsm-crop x 0 y0 w177 h118	0.15	0.884086		C1-Cav1KO_Control_48h_9EG7-488_EEA-1_647_7.lsm-crop and C2-Cav1KO_Control_48h_9EG7-488_EEA-1_647_7.lsm-crop x 0 y0 w342 h263	0.169	0.794733
C1-Cav1KO_Control_48h_CD147-488_EEA-1_647_17.lsm-crop and C2-Cav1KO_Control_48h_CD147-488_EEA-1_647_17.lsm-crop x 0 y0 w425 h330	0.126	0.742633		C1-Cav1KO_Control_48h_9EG7-488_EEA-1_647_8.lsm-crop and C2-Cav1KO_Control_48h_9EG7-488_EEA-1_647_8.lsm-crop x 0 y0 w424 h234	0.253	1.18975
C1-Cav1KO_Control_48h_CD147-488_EEA-1_647_18.lsm-crop and C2-Cav1KO_Control_48h_CD147-488_EEA-1_647_18.lsm-crop x 0 y0 w268 h190	0.24	1.41454		C1-Cav1KO_Control_48h_9EG7-488_EEA-1_647_9.lsm-crop and C2-Cav1KO_Control_48h_9EG7-488_EEA-1_647_9.lsm-crop x 0 y0 w399 h257	0.153	0.719492
C1-Cav1KO_Control_48h_CD147-488_EEA-1_647_19.lsm-crop and C2-Cav1KO_Control_48h_CD147-488_EEA-1_647_19.lsm-crop x 0 y0 w643 h213	0.171	1.00786
C1-Cav1KO_Control_48h_CD147-488_EEA-1_647_2.lsm-crop and C2-Cav1KO_Control_48h_CD147-488_EEA-1_647_2.lsm-crop x 0 y0 w168 h143	0.123	0.724951
C1-Cav1KO_Control_48h_CD147-488_EEA-1_647_20.lsm-crop and C2-Cav1KO_Control_48h_CD147-488_EEA-1_647_20.lsm-crop x 0 y0 w480 h224	0.177	1.04322
C1-Cav1KO_Control_48h_CD147-488_EEA-1_647_3.lsm-crop and C2-Cav1KO_Control_48h_CD147-488_EEA-1_647_3.lsm-crop x 0 y0 w196 h130	0.339	1.99804
C1-Cav1KO_Control_48h_CD147-488_EEA-1_647_4.lsm-crop and C2-Cav1KO_Control_48h_CD147-488_EEA-1_647_4.lsm-crop x 0 y0 w405 h191	0.249	1.46758
C1-Cav1KO_Control_48h_CD147-488_EEA-1_647_5.lsm-crop and C2-Cav1KO_Control_48h_CD147-488_EEA-1_647_5.lsm-crop x 0 y0 w312 h155	0.188	1.10806
C1-Cav1KO_Control_48h_CD147-488_EEA-1_647_6.lsm-crop and C2-Cav1KO_Control_48h_CD147-488_EEA-1_647_6.lsm-crop x 0 y0 w383 h244	0.213	1.2554
C1-Cav1KO_Control_48h_CD147-488_EEA-1_647_7.lsm-crop and C2-Cav1KO_Control_48h_CD147-488_EEA-1_647_7.lsm-crop x 0 y0 w258 h168	0.15	0.884086
C1-Cav1KO_Control_48h_CD147-488_EEA-1_647_9.lsm-crop and C2-Cav1KO_Control_48h_CD147-488_EEA-1_647_9.lsm-crop x 0 y0 w225 h171	0.109	0.642436
C1-Cav1KO_Control_48h_CD147-488_EEA-1_647.lsm-crop and C2-Cav1KO_Control_48h_CD147-488_EEA-1_647.lsm-crop x 0 y0 w318 h205	0.191	1.12574
C1-Cav1KO_Control_48h_CD147-488_EEA-1_647_10.lsm-crop and C2-Cav1KO_Control_48h_CD147-488_EEA-1_647_10.lsm-crop x 0 y0 w201 h180	0.151	0.88998
C1-Cav1KO_Control_48h_CD147-488_EEA-1_647_11.lsm-crop and C2-Cav1KO_Control_48h_CD147-488_EEA-1_647_11.lsm-crop x 0 y0 w234 h195	0.174	1.02554
C1-Cav1KO_Control_48h_CD147-488_EEA-1_647_12.lsm-crop and C2-Cav1KO_Control_48h_CD147-488_EEA-1_647_12.lsm-crop x 0 y0 w183 h114	0.18	1.0609
C1-Cav1KO_Control_48h_CD147-488_EEA-1_647_13.lsm-crop and C2-Cav1KO_Control_48h_CD147-488_EEA-1_647_13.lsm-crop x 0 y0 w274 h198	0.079	0.465619
C1-Cav1KO_Control_48h_CD147-488_EEA-1_647_14.lsm-crop and C2-Cav1KO_Control_48h_CD147-488_EEA-1_647_14.lsm-crop x 0 y0 w352 h314	0.243	1.43222
C1-Cav1KO_Control_48h_CD147-488_EEA-1_647_15.lsm-crop and C2-Cav1KO_Control_48h_CD147-488_EEA-1_647_15.lsm-crop x 0 y0 w246 h180	0.153	0.901768
C1-Cav1KO_Control_48h_CD147-488_EEA-1_647_16.lsm-crop and C2-Cav1KO_Control_48h_CD147-488_EEA-1_647_16.lsm-crop x 0 y0 w389 h164	0.186	1.09627
C1-Cav1KO_Control_48h_CD147-488_EEA-1_647_18.lsm-crop and C2-Cav1KO_Control_48h_CD147-488_EEA-1_647_18.lsm-crop x 0 y0 w349 h224	0.19	1.11984
C1-Cav1KO_Control_48h_CD147-488_EEA-1_647_19.lsm-crop and C2-Cav1KO_Control_48h_CD147-488_EEA-1_647_19.lsm-crop x 0 y0 w234 h179	0.277	1.63261
C1-Cav1KO_Control_48h_CD147-488_EEA-1_647_2.lsm-crop and C2-Cav1KO_Control_48h_CD147-488_EEA-1_647_2.lsm-crop x 0 y0 w198 h141	0.178	1.04912
C1-Cav1KO_Control_48h_CD147-488_EEA-1_647_20.lsm-crop and C2-Cav1KO_Control_48h_CD147-488_EEA-1_647_20.lsm-crop x 0 y0 w267 h192	0.147	0.866405
C1-Cav1KO_Control_48h_CD147-488_EEA-1_647_3.lsm-crop and C2-Cav1KO_Control_48h_CD147-488_EEA-1_647_3.lsm-crop x 0 y0 w338 h207	0.18	1.0609
C1-Cav1KO_Control_48h_CD147-488_EEA-1_647_4.lsm-crop and C2-Cav1KO_Control_48h_CD147-488_EEA-1_647_4.lsm-crop x 0 y0 w291 h231	0.095	0.559921
C1-Cav1KO_Control_48h_CD147-488_EEA-1_647_5.lsm-crop and C2-Cav1KO_Control_48h_CD147-488_EEA-1_647_5.lsm-crop x 0 y0 w278 h228	0.2	1.17878
C1-Cav1KO_Control_48h_CD147-488_EEA-1_647_6.lsm-crop and C2-Cav1KO_Control_48h_CD147-488_EEA-1_647_6.lsm-crop x 0 y0 w413 h208	0.158	0.931238
C1-Cav1KO_Control_48h_CD147-488_EEA-1_647_7.lsm-crop and C2-Cav1KO_Control_48h_CD147-488_EEA-1_647_7.lsm-crop x 0 y0 w334 h280	0.151	0.88998
C1-Cav1KO_Control_48h_CD147-488_EEA-1_647_8.lsm-crop and C2-Cav1KO_Control_48h_CD147-488_EEA-1_647_8.lsm-crop x 0 y0 w274 h238	0.149	0.878193
C1-Cav1KO_Control_48h_CD147-488_EEA-1_647_9.lsm-crop and C2-Cav1KO_Control_48h_CD147-488_EEA-1_647_9.lsm-crop x 0 y0 w271 h241	0.233	1.37328
Average	0.169667	1		Average	0.21265	1
SEM	0.00825026	0.0486263		SEM	0.0182944	0.0860306
C1-Cav1KO_siHOOK1_48h_CD147-488_EEA-1_647.lsm-crop and C2-Cav1KO_siHOOK1_48h_CD147-488_EEA-1_647.lsm-crop x 0 y0 w512 h512	0.192	1.13163		C1-Cav1KO_siHOOK1_48h_9EG7-488_EEA-1_647.lsm-crop and C2-Cav1KO_siHOOK1_48h_9EG7-488_EEA-1_647.lsm-crop x 0 y0 w371 h206	0.405	1.90454
C1-Cav1KO_siHOOK1_48h_CD147-488_EEA-1_647_10.lsm-crop and C2-Cav1KO_siHOOK1_48h_CD147-488_EEA-1_647_10.lsm-crop x 0 y0 w512 h512	0.212	1.24951		C1-Cav1KO_siHOOK1_48h_9EG7-488_EEA-1_647_10.lsm-crop and C2-Cav1KO_siHOOK1_48h_9EG7-488_EEA-1_647_10.lsm-crop x 0 y0 w305 h145	0.251	1.18034
C1-Cav1KO_siHOOK1_48h_CD147-488_EEA-1_647_2.lsm-crop and C2-Cav1KO_siHOOK1_48h_CD147-488_EEA-1_647_2.lsm-crop x 0 y0 w512 h512	0.182	1.07269		C1-Cav1KO_siHOOK1_48h_9EG7-488_EEA-1_647_11.lsm-crop and C2-Cav1KO_siHOOK1_48h_9EG7-488_EEA-1_647_11.lsm-crop x 0 y0 w280 h148	0.134	0.630143
C1-Cav1KO_siHOOK1_48h_CD147-488_EEA-1_647_3.lsm-crop and C2-Cav1KO_siHOOK1_48h_CD147-488_EEA-1_647_3.lsm-crop x 0 y0 w512 h512	0.297	1.75049		C1-Cav1KO_siHOOK1_48h_9EG7-488_EEA-1_647_12.lsm-crop and C2-Cav1KO_siHOOK1_48h_9EG7-488_EEA-1_647_12.lsm-crop x 0 y0 w355 h126	0.194	0.912297
C1-Cav1KO_siHOOK1_48h_CD147-488_EEA-1_647_4.lsm-crop and C2-Cav1KO_siHOOK1_48h_CD147-488_EEA-1_647_4.lsm-crop x 0 y0 w512 h512	0.339	1.99804		C1-Cav1KO_siHOOK1_48h_9EG7-488_EEA-1_647_13.lsm-crop and C2-Cav1KO_siHOOK1_48h_9EG7-488_EEA-1_647_13.lsm-crop x 0 y0 w641 h329	0.168	0.790031
C1-Cav1KO_siHOOK1_48h_CD147-488_EEA-1_647_5.lsm-crop and C2-Cav1KO_siHOOK1_48h_CD147-488_EEA-1_647_5.lsm-crop x 0 y0 w512 h512	0.221	1.30255		C1-Cav1KO_siHOOK1_48h_9EG7-488_EEA-1_647_14.lsm-crop and C2-Cav1KO_siHOOK1_48h_9EG7-488_EEA-1_647_14.lsm-crop x 0 y0 w313 h251	0.115	0.540795
C1-Cav1KO_siHOOK1_48h_CD147-488_EEA-1_647_6.lsm-crop and C2-Cav1KO_siHOOK1_48h_CD147-488_EEA-1_647_6.lsm-crop x 0 y0 w512 h512	0.26	1.53242		C1-Cav1KO_siHOOK1_48h_9EG7-488_EEA-1_647_15.lsm-crop and C2-Cav1KO_siHOOK1_48h_9EG7-488_EEA-1_647_15.lsm-crop x 0 y0 w336 h204	0.201	0.945215
C1-Cav1KO_siHOOK1_48h_CD147-488_EEA-1_647_7.lsm-crop and C2-Cav1KO_siHOOK1_48h_CD147-488_EEA-1_647_7.lsm-crop x 0 y0 w512 h512	0.262	1.5442		C1-Cav1KO_siHOOK1_48h_9EG7-488_EEA-1_647_16.lsm-crop and C2-Cav1KO_siHOOK1_48h_9EG7-488_EEA-1_647_16.lsm-crop x 0 y0 w253 h245	0.307	1.44369
C1-Cav1KO_siHOOK1_48h_CD147-488_EEA-1_647_8.lsm-crop and C2-Cav1KO_siHOOK1_48h_CD147-488_EEA-1_647_8.lsm-crop x 0 y0 w512 h512	0.264	1.55599		C1-Cav1KO_siHOOK1_48h_9EG7-488_EEA-1_647_17.lsm-crop and C2-Cav1KO_siHOOK1_48h_9EG7-488_EEA-1_647_17.lsm-crop x 0 y0 w286 h236	0.145	0.681872
C1-Cav1KO_siHOOK1_48h_CD147-488_EEA-1_647_9.lsm-crop and C2-Cav1KO_siHOOK1_48h_CD147-488_EEA-1_647_9.lsm-crop x 0 y0 w512 h512	0.212	1.24951		C1-Cav1KO_siHOOK1_48h_9EG7-488_EEA-1_647_18.lsm-crop and C2-Cav1KO_siHOOK1_48h_9EG7-488_EEA-1_647_18.lsm-crop x 0 y0 w417 h382	0.23	1.08159
C1-Cav1KO_siHOOK1_48h_CD147-488_EEA-1_647_10.lsm-crop and C2-Cav1KO_siHOOK1_48h_CD147-488_EEA-1_647_10.lsm-crop x 0 y0 w416 h214	0.205	1.20825		C1-Cav1KO_siHOOK1_48h_9EG7-488_EEA-1_647_19.lsm-crop and C2-Cav1KO_siHOOK1_48h_9EG7-488_EEA-1_647_19.lsm-crop x 0 y0 w535 h191	0.229	1.07689
C1-Cav1KO_siHOOK1_48h_CD147-488_EEA-1_647_11.lsm-crop and C2-Cav1KO_siHOOK1_48h_CD147-488_EEA-1_647_11.lsm-crop x 0 y0 w322 h111	0.099	0.583497		C1-Cav1KO_siHOOK1_48h_9EG7-488_EEA-1_647_2.lsm-crop and C2-Cav1KO_siHOOK1_48h_9EG7-488_EEA-1_647_2.lsm-crop x 0 y0 w394 h182	0.262	1.23207
C1-Cav1KO_siHOOK1_48h_CD147-488_EEA-1_647_12.lsm-crop and C2-Cav1KO_siHOOK1_48h_CD147-488_EEA-1_647_12.lsm-crop x 0 y0 w519 h174	0.315	1.85658		C1-Cav1KO_siHOOK1_48h_9EG7-488_EEA-1_647_20.lsm-crop and C2-Cav1KO_siHOOK1_48h_9EG7-488_EEA-1_647_20.lsm-crop x 0 y0 w319 h228	0.057	0.268046
C1-Cav1KO_siHOOK1_48h_CD147-488_EEA-1_647_13.lsm-crop and C2-Cav1KO_siHOOK1_48h_CD147-488_EEA-1_647_13.lsm-crop x 0 y0 w794 h195	0.372	2.19253		C1-Cav1KO_siHOOK1_48h_9EG7-488_EEA-1_647_3.lsm-crop and C2-Cav1KO_siHOOK1_48h_9EG7-488_EEA-1_647_3.lsm-crop x 0 y0 w306 h145	0.066	0.310369
C1-Cav1KO_siHOOK1_48h_CD147-488_EEA-1_647_14.lsm-crop and C2-Cav1KO_siHOOK1_48h_CD147-488_EEA-1_647_14.lsm-crop x 0 y0 w343 h159	0.144	0.848723		C1-Cav1KO_siHOOK1_48h_9EG7-488_EEA-1_647_4.lsm-crop and C2-Cav1KO_siHOOK1_48h_9EG7-488_EEA-1_647_4.lsm-crop x 0 y0 w322 h211	0.232	1.09099
C1-Cav1KO_siHOOK1_48h_CD147-488_EEA-1_647_15.lsm-crop and C2-Cav1KO_siHOOK1_48h_CD147-488_EEA-1_647_15.lsm-crop x 0 y0 w264 h165	0.14	0.825147		C1-Cav1KO_siHOOK1_48h_9EG7-488_EEA-1_647_5.lsm-crop and C2-Cav1KO_siHOOK1_48h_9EG7-488_EEA-1_647_5.lsm-crop x 0 y0 w359 h228	0.311	1.4625
C1-Cav1KO_siHOOK1_48h_CD147-488_EEA-1_647_16.lsm-crop and C2-Cav1KO_siHOOK1_48h_CD147-488_EEA-1_647_16.lsm-crop x 0 y0 w644 h228	0.124	0.730845		C1-Cav1KO_siHOOK1_48h_9EG7-488_EEA-1_647_6.lsm-crop and C2-Cav1KO_siHOOK1_48h_9EG7-488_EEA-1_647_6.lsm-crop x 0 y0 w300 h182	0.146	0.686574
C1-Cav1KO_siHOOK1_48h_CD147-488_EEA-1_647_17.lsm-crop and C2-Cav1KO_siHOOK1_48h_CD147-488_EEA-1_647_17.lsm-crop x 0 y0 w672 h179	0.296	1.7446		C1-Cav1KO_siHOOK1_48h_9EG7-488_EEA-1_647_7.lsm-crop and C2-Cav1KO_siHOOK1_48h_9EG7-488_EEA-1_647_7.lsm-crop x 0 y0 w256 h140	0.103	0.484364
C1-Cav1KO_siHOOK1_48h_CD147-488_EEA-1_647_18.lsm-crop and C2-Cav1KO_siHOOK1_48h_CD147-488_EEA-1_647_18.lsm-crop x 0 y0 w365 h162	0.114	0.671906		C1-Cav1KO_siHOOK1_48h_9EG7-488_EEA-1_647_8.lsm-crop and C2-Cav1KO_siHOOK1_48h_9EG7-488_EEA-1_647_8.lsm-crop x 0 y0 w288 h216	0.112	0.526687
C1-Cav1KO_siHOOK1_48h_CD147-488_EEA-1_647_19.lsm-crop and C2-Cav1KO_siHOOK1_48h_CD147-488_EEA-1_647_19.lsm-crop x 0 y0 w530 h318	0.159	0.937132		C1-Cav1KO_siHOOK1_48h_9EG7-488_EEA-1_647_9.lsm-crop and C2-Cav1KO_siHOOK1_48h_9EG7-488_EEA-1_647_9.lsm-crop x 0 y0 w412 h168	0.395	1.85751
C1-Cav1KO_siHOOK1_48h_CD147-488_EEA-1_647_2.lsm-crop and C2-Cav1KO_siHOOK1_48h_CD147-488_EEA-1_647_2.lsm-crop x 0 y0 w450 h234	0.316	1.86248
C1-Cav1KO_siHOOK1_48h_CD147-488_EEA-1_647_20.lsm-crop and C2-Cav1KO_siHOOK1_48h_CD147-488_EEA-1_647_20.lsm-crop x 0 y0 w303 h147	0.152	0.895874
C1-Cav1KO_siHOOK1_48h_CD147-488_EEA-1_647_3.lsm-crop and C2-Cav1KO_siHOOK1_48h_CD147-488_EEA-1_647_3.lsm-crop x 0 y0 w508 h173	0.138	0.81336
C1-Cav1KO_siHOOK1_48h_CD147-488_EEA-1_647_4.lsm-crop and C2-Cav1KO_siHOOK1_48h_CD147-488_EEA-1_647_4.lsm-crop x 0 y0 w350 h160	0.116	0.683694
C1-Cav1KO_siHOOK1_48h_CD147-488_EEA-1_647_5.lsm-crop and C2-Cav1KO_siHOOK1_48h_CD147-488_EEA-1_647_5.lsm-crop x 0 y0 w389 h234	0.12	0.707269
C1-Cav1KO_siHOOK1_48h_CD147-488_EEA-1_647_6.lsm-crop and C2-Cav1KO_siHOOK1_48h_CD147-488_EEA-1_647_6.lsm-crop x 0 y0 w629 h157	0.159	0.937132
C1-Cav1KO_siHOOK1_48h_CD147-488_EEA-1_647_7.lsm-crop and C2-Cav1KO_siHOOK1_48h_CD147-488_EEA-1_647_7.lsm-crop x 0 y0 w363 h195	0.127	0.748527
C1-Cav1KO_siHOOK1_48h_CD147-488_EEA-1_647_8.lsm-crop and C2-Cav1KO_siHOOK1_48h_CD147-488_EEA-1_647_8.lsm-crop x 0 y0 w374 h267	0.124	0.730845
C1-Cav1KO_siHOOK1_48h_CD147-488_EEA-1_647_9.lsm-crop and C2-Cav1KO_siHOOK1_48h_CD147-488_EEA-1_647_9.lsm-crop x 0 y0 w433 h177	0.241	1.42043
C1-Cav1KO_siHOOK1_48h_CD147-488_EEA-1_647.lsm-crop and C2-Cav1KO_siHOOK1_48h_CD147-488_EEA-1_647.lsm-crop x 0 y0 w344 h323	0.187	1.10216
C1-Cav1KO_siHOOK1_48h_CD147-488_EEA-1_647_10.lsm-crop and C2-Cav1KO_siHOOK1_48h_CD147-488_EEA-1_647_10.lsm-crop x 0 y0 w360 h322	0.199	1.17289
C1-Cav1KO_siHOOK1_48h_CD147-488_EEA-1_647_11.lsm-crop and C2-Cav1KO_siHOOK1_48h_CD147-488_EEA-1_647_11.lsm-crop x 0 y0 w315 h254	0.183	1.07859
C1-Cav1KO_siHOOK1_48h_CD147-488_EEA-1_647_12.lsm-crop and C2-Cav1KO_siHOOK1_48h_CD147-488_EEA-1_647_12.lsm-crop x 0 y0 w386 h361	0.123	0.724951
C1-Cav1KO_siHOOK1_48h_CD147-488_EEA-1_647_13.lsm-crop and C2-Cav1KO_siHOOK1_48h_CD147-488_EEA-1_647_13.lsm-crop x 0 y0 w349 h277	0.212	1.24951
C1-Cav1KO_siHOOK1_48h_CD147-488_EEA-1_647_14.lsm-crop and C2-Cav1KO_siHOOK1_48h_CD147-488_EEA-1_647_14.lsm-crop x 0 y0 w360 h240	0.199	1.17289
C1-Cav1KO_siHOOK1_48h_CD147-488_EEA-1_647_15.lsm-crop and C2-Cav1KO_siHOOK1_48h_CD147-488_EEA-1_647_15.lsm-crop x 0 y0 w319 h336	0.196	1.15521
C1-Cav1KO_siHOOK1_48h_CD147-488_EEA-1_647_16.lsm-crop and C2-Cav1KO_siHOOK1_48h_CD147-488_EEA-1_647_16.lsm-crop x 0 y0 w312 h257	0.137	0.807466
C1-Cav1KO_siHOOK1_48h_CD147-488_EEA-1_647_17.lsm-crop and C2-Cav1KO_siHOOK1_48h_CD147-488_EEA-1_647_17.lsm-crop x 0 y0 w580 h211	0.113	0.666012
C1-Cav1KO_siHOOK1_48h_CD147-488_EEA-1_647_18.lsm-crop and C2-Cav1KO_siHOOK1_48h_CD147-488_EEA-1_647_18.lsm-crop x 0 y0 w337 h279	0.219	1.29077
C1-Cav1KO_siHOOK1_48h_CD147-488_EEA-1_647_19.lsm-crop and C2-Cav1KO_siHOOK1_48h_CD147-488_EEA-1_647_19.lsm-crop x 0 y0 w257 h196	0.231	1.36149
C1-Cav1KO_siHOOK1_48h_CD147-488_EEA-1_647_2.lsm-crop and C2-Cav1KO_siHOOK1_48h_CD147-488_EEA-1_647_2.lsm-crop x 0 y0 w371 h246	0.15	0.884086
C1-Cav1KO_siHOOK1_48h_CD147-488_EEA-1_647_20.lsm-crop and C2-Cav1KO_siHOOK1_48h_CD147-488_EEA-1_647_20.lsm-crop x 0 y0 w355 h226	0.287	1.69155
C1-Cav1KO_siHOOK1_48h_CD147-488_EEA-1_647_3.lsm-crop and C2-Cav1KO_siHOOK1_48h_CD147-488_EEA-1_647_3.lsm-crop x 0 y0 w448 h256	0.177	1.04322
C1-Cav1KO_siHOOK1_48h_CD147-488_EEA-1_647_4.lsm-crop and C2-Cav1KO_siHOOK1_48h_CD147-488_EEA-1_647_4.lsm-crop x 0 y0 w282 h217	0.313	1.84479
C1-Cav1KO_siHOOK1_48h_CD147-488_EEA-1_647_5.lsm-crop and C2-Cav1KO_siHOOK1_48h_CD147-488_EEA-1_647_5.lsm-crop x 0 y0 w371 h286	0.202	1.19057
C1-Cav1KO_siHOOK1_48h_CD147-488_EEA-1_647_6.lsm-crop and C2-Cav1KO_siHOOK1_48h_CD147-488_EEA-1_647_6.lsm-crop x 0 y0 w287 h200	0.177	1.04322
C1-Cav1KO_siHOOK1_48h_CD147-488_EEA-1_647_7.lsm-crop and C2-Cav1KO_siHOOK1_48h_CD147-488_EEA-1_647_7.lsm-crop x 0 y0 w367 h207	0.245	1.44401
C1-Cav1KO_siHOOK1_48h_CD147-488_EEA-1_647_8.lsm-crop and C2-Cav1KO_siHOOK1_48h_CD147-488_EEA-1_647_8.lsm-crop x 0 y0 w332 h224	0.145	0.854617
C1-Cav1KO_siHOOK1_48h_CD147-488_EEA-1_647_9.lsm-crop and C2-Cav1KO_siHOOK1_48h_CD147-488_EEA-1_647_9.lsm-crop x 0 y0 w305 h239	0.09	0.530452
Average	0.197694	1.16519		Average	0.20315	0.955326
SEM	0.0099521	0.0586568		SEM	0.0221818	0.104311

## Sheet: Colocalization 48h Figure 6J
Image File	Image Serie	Channels Analyzed (ch1 vs. ch2)	Pearson coeff.	Normalized by EACH Mean Control	M1	M2	ICQ	Ch1 threshold range	Ch2 threshold range
Cav1WTvsKORab11124DN9EG7488LBPA647_bis.lif_.lif	Cav1WT_Control_9EG7_488_LBPA647_Vero_settings	Ch_Reference_actBCh_AND_Ch_DextranCh	0.244	0.754134	0.695	0.879	0.393	0; 0	0; 0\n
Cav1WTvsKORab11124DN9EG7488LBPA647_bis.lif_.lif	Cav1WT_Control_9EG7_488_LBPA647_Vero_settings_2	Ch_Reference_actBCh_AND_Ch_DextranCh	0.325	1.00448	0.721	0.883	0.39	0; 0	0; 0\n
Cav1WTvsKORab11124DN9EG7488LBPA647_bis.lif_.lif	Cav1WT_Control_9EG7_488_LBPA647_Vero_settings_3	Ch_Reference_actBCh_AND_Ch_DextranCh	0.271	0.837583	0.814	0.924	0.376	0; 0	0; 0\n
Cav1WTvsKORab11124DN9EG7488LBPA647_bis.lif_.lif	Cav1WT_Control_9EG7_488_LBPA647_Vero_settings_4	Ch_Reference_actBCh_AND_Ch_DextranCh	0.349	1.07866	0.702	0.899	0.403	0; 0	0; 0\n
Cav1WTvsKORab11124DN9EG7488LBPA647_bis.lif_.lif	Cav1WT_Control_9EG7_488_LBPA647_Vero_settings_5	Ch_Reference_actBCh_AND_Ch_DextranCh	0.273	0.843764	0.839	0.936	0.329	0; 0	0; 0\n
Cav1WTvsKORab11124DN9EG7488LBPA647_bis.lif_.lif	Cav1WT_Control_9EG7_488_LBPA647_Vero_settings_6	Ch_Reference_actBCh_AND_Ch_DextranCh	0.509	1.57317	0.856	0.936	0.313	0; 0	0; 0\n			Only with Vero settings+Results from Bis LBPA
Cav1WTvsKORab11124DN9EG7488LBPA647_bis.lif_.lif	Cav1WT_Control_9EG7_488_LBPA647_Vero_settings_7	Ch_Reference_actBCh_AND_Ch_DextranCh	0.453	1.40009	0.774	0.91	0.359	0; 0	0; 0\n				Average	SEM			Average	SEM
Cav1WTvsKORab11124DN9EG7488LBPA647_bis.lif_.lif	Cav1WT_Control_9EG7_488_LBPA647_Vero_settings_8	Ch_Reference_actBCh_AND_Ch_DextranCh	0.336	1.03848	0.796	0.925	0.35	0; 0	0; 0\n		Cav1WT Control	ActBeta1 vsLBPA	0.32355	0.0169293	Cav1KO Control	ActBeta1 vs LBPA	0.4561	0.0172572
Cav1WTvsKORab11124DN9EG7488LBPA647_bis.lif_.lif	Cav1WT_Control_9EG7_488_LBPA647_Vero_settings_9	Ch_Reference_actBCh_AND_Ch_DextranCh	0.297	0.917942	0.724	0.941	0.389	0; 0	0; 0\n		Cav1WT Rab11 124 I DN	ActBeta1 vsLBPA	0.38825	0.0179015	Cav1KO Rab11 124DN	ActBeta1 vs LBPA	0.53325	0.0124116
Cav1WTvsKORab11124DN9EG7488LBPA647_bis.lif_.lif	Cav1WT_Control_9EG7_488_LBPA647_Vero_settings_10	Ch_Reference_actBCh_AND_Ch_DextranCh	0.36	1.11266	0.755	0.944	0.402	0; 0	0; 0\n
Cav1WTvsKORab11124DN9EG7488LBPA647.lif	Cav1WT_Control_9EG7_488_LBPA647_Vero_settings_11	Ch_Reference_actBCh_AND_Ch_DextranCh	0.383	1.18374	0.814	0.901	0.36	0; 0	0; 0\n		Cav1WT
Cav1WTvsKORab11124DN9EG7488LBPA647.lif	Cav1WT_Control_9EG7_488_LBPA647_Vero_settings_12	Ch_Reference_actBCh_AND_Ch_DextranCh	0.24	0.741771	0.908	0.957	0.309	0; 0	0; 0\n		Cav1KO
Cav1WTvsKORab11124DN9EG7488LBPA647.lif	Cav1WT_Control_9EG7_488_LBPA647_Vero_settings_13	Ch_Reference_actBCh_AND_Ch_DextranCh	0.303	0.936486	0.856	0.934	0.363	0; 0	0; 0\n
Cav1WTvsKORab11124DN9EG7488LBPA647.lif	Cav1WT_Control_9EG7_488_LBPA647_Vero_settings_14	Ch_Reference_actBCh_AND_Ch_DextranCh	0.25	0.772678	0.893	0.954	0.317	0; 0	0; 0\n
Cav1WTvsKORab11124DN9EG7488LBPA647.lif	Cav1WT_Control_9EG7_488_LBPA647_Vero_settings_15	Ch_Reference_actBCh_AND_Ch_DextranCh	0.238	0.73559	0.854	0.92	0.336	0; 0	0; 0\n
Cav1WTvsKORab11124DN9EG7488LBPA647.lif	Cav1WT_Control_9EG7_488_LBPA647_Vero_settings_16	Ch_Reference_actBCh_AND_Ch_DextranCh	0.436	1.34755	0.804	0.885	0.355	0; 0	0; 0\n
Cav1WTvsKORab11124DN9EG7488LBPA647.lif	Cav1WT_Control_9EG7_488_LBPA647_Vero_settings_17	Ch_Reference_actBCh_AND_Ch_DextranCh	0.256	0.791222	0.851	0.923	0.312	0; 0	0; 0\n
Cav1WTvsKORab11124DN9EG7488LBPA647.lif	Cav1WT_Control_9EG7_488_LBPA647_Vero_settings_18	Ch_Reference_actBCh_AND_Ch_DextranCh	0.28	0.865399	0.87	0.932	0.318	0; 0	0; 0\n
Cav1WTvsKORab11124DN9EG7488LBPA647.lif	Cav1WT_Control_9EG7_488_LBPA647_Vero_settings_19	Ch_Reference_actBCh_AND_Ch_DextranCh	0.322	0.995209	0.846	0.913	0.324	0; 0	0; 0\n
Cav1WTvsKORab11124DN9EG7488LBPA647.lif	Cav1WT_Control_9EG7_488_LBPA647_Vero_settings_20	Ch_Reference_actBCh_AND_Ch_DextranCh	0.346	1.06939	0.846	0.92	0.346	0; 0	0; 0\n
Cav1WTvsKORab11124DN9EG7488LBPA647_bis.lif_.lif	Cav1WT_Rab11_124DN_9EG7_488_LBPA647_Vero_settings	Ch_Reference_actBCh_AND_Ch_DextranCh	0.351	1.08484	0.803	0.908	0.379	0; 0	0; 0\n
Cav1WTvsKORab11124DN9EG7488LBPA647_bis.lif_.lif	Cav1WT_Rab11_124DN_9EG7_488_LBPA647_Vero_settings_2	Ch_Reference_actBCh_AND_Ch_DextranCh	0.36	1.11266	0.827	0.925	0.362	0; 0	0; 0\n
Cav1WTvsKORab11124DN9EG7488LBPA647_bis.lif_.lif	Cav1WT_Rab11_124DN_9EG7_488_LBPA647_Vero_settings_3	Ch_Reference_actBCh_AND_Ch_DextranCh	0.272	0.840674	0.856	0.938	0.359	0; 0	0; 0\n
Cav1WTvsKORab11124DN9EG7488LBPA647_bis.lif_.lif	Cav1WT_Rab11_124DN_9EG7_488_LBPA647_Vero_settings_4	Ch_Reference_actBCh_AND_Ch_DextranCh	0.388	1.1992	0.848	0.931	0.387	0; 0	0; 0\n
Cav1WTvsKORab11124DN9EG7488LBPA647_bis.lif_.lif	Cav1WT_Rab11_124DN_9EG7_488_LBPA647_Vero_settings_5	Ch_Reference_actBCh_AND_Ch_DextranCh	0.318	0.982847	0.905	0.878	0.349	0; 0	0; 0\n
Cav1WTvsKORab11124DN9EG7488LBPA647_bis.lif_.lif	Cav1WT_Rab11_124DN_9EG7_488_LBPA647_Vero_settings_6	Ch_Reference_actBCh_AND_Ch_DextranCh	0.424	1.31046	0.811	0.889	0.4	0; 0	0; 0\n
Cav1WTvsKORab11124DN9EG7488LBPA647_bis.lif_.lif	Cav1WT_Rab11_124DN_9EG7_488_LBPA647_Vero_settings_7	Ch_Reference_actBCh_AND_Ch_DextranCh	0.295	0.91176	0.912	0.909	0.34	0; 0	0; 0\n
Cav1WTvsKORab11124DN9EG7488LBPA647_bis.lif_.lif	Cav1WT_Rab11_124DN_9EG7_488_LBPA647_Vero_settings_8	Ch_Reference_actBCh_AND_Ch_DextranCh	0.37	1.14356	0.823	0.897	0.423	0; 0	0; 0\n
Cav1WTvsKORab11124DN9EG7488LBPA647_bis.lif_.lif	Cav1WT_Rab11_124DN_9EG7_488_LBPA647_Vero_settings_9	Ch_Reference_actBCh_AND_Ch_DextranCh	0.426	1.31664	0.764	0.903	0.416	0; 0	0; 0\n
Cav1WTvsKORab11124DN9EG7488LBPA647_bis.lif_.lif	Cav1WT_Rab11_124DN_9EG7_488_LBPA647_Vero_settings_10	Ch_Reference_actBCh_AND_Ch_DextranCh	0.373	1.15284	0.746	0.925	0.407	0; 0	0; 0\n
Cav1WTvsKORab11124DN9EG7488LBPA647.lif	Cav1WT_Rab11_124DN_9EG7_488_LBPA647_Vero_settings_11	Ch_Reference_actBCh_AND_Ch_DextranCh	0.371	1.14665	0.883	0.842	0.378	0; 0	0; 0\n			Only with Vero settings+Results from Bis LBPA Normalized by each Control
Cav1WTvsKORab11124DN9EG7488LBPA647.lif	Cav1WT_Rab11_124DN_9EG7_488_LBPA647_Vero_settings_12	Ch_Reference_actBCh_AND_Ch_DextranCh	0.293	0.905579	0.904	0.949	0.28	0; 0	0; 0\n				Average	SEM			Average	SEM
Cav1WTvsKORab11124DN9EG7488LBPA647.lif	Cav1WT_Rab11_124DN_9EG7_488_LBPA647_Vero_settings_13	Ch_Reference_actBCh_AND_Ch_DextranCh	0.413	1.27646	0.845	0.911	0.337	0; 0	0; 0\n		Cav1WT Control	ActBeta1 vsLBPA	1	0.0523237	Cav1KO Control	ActBeta1 vs LBPA	1	0.0378364
Cav1WTvsKORab11124DN9EG7488LBPA647.lif	Cav1WT_Rab11_124DN_9EG7_488_LBPA647_Vero_settings_14	Ch_Reference_actBCh_AND_Ch_DextranCh	0.516	1.59481	0.852	0.9	0.373	0; 0	0; 0\n		Cav1WT Rab11 124 I DN	ActBeta1 vsLBPA	1.19997	0.0553283	Cav1KO Rab11 124DN	ActBeta1 vs LBPA	1.16915	0.0272124
Cav1WTvsKORab11124DN9EG7488LBPA647.lif	Cav1WT_Rab11_124DN_9EG7_488_LBPA647_Vero_settings_15	Ch_Reference_actBCh_AND_Ch_DextranCh	0.347	1.07248	0.831	0.927	0.355	0; 0	0; 0\n
Cav1WTvsKORab11124DN9EG7488LBPA647.lif	Cav1WT_Rab11_124DN_9EG7_488_LBPA647_Vero_settings_16	Ch_Reference_actBCh_AND_Ch_DextranCh	0.425	1.31355	0.902	0.913	0.336	0; 0	0; 0\n
Cav1WTvsKORab11124DN9EG7488LBPA647.lif	Cav1WT_Rab11_124DN_9EG7_488_LBPA647_Vero_settings_17	Ch_Reference_actBCh_AND_Ch_DextranCh	0.42	1.2981	0.867	0.921	0.395	0; 0	0; 0\n
Cav1WTvsKORab11124DN9EG7488LBPA647.lif	Cav1WT_Rab11_124DN_9EG7_488_LBPA647_Vero_settings_18	Ch_Reference_actBCh_AND_Ch_DextranCh	0.4	1.23628	0.871	0.927	0.36	0; 0	0; 0\n
Cav1WTvsKORab11124DN9EG7488LBPA647.lif	Cav1WT_Rab11_124DN_9EG7_488_LBPA647_Vero_settings_19	Ch_Reference_actBCh_AND_Ch_DextranCh	0.373	1.15284	0.904	0.952	0.338	0; 0	0; 0\n
Cav1WTvsKORab11124DN9EG7488LBPA647.lif	Cav1WT_Rab11_124DN_9EG7_488_LBPA647_Vero_settings_20	Ch_Reference_actBCh_AND_Ch_DextranCh	0.63	1.94715	0.883	0.935	0.374	0; 0	0; 0\n
Cav1WTvsKORab11124DN9EG7488LBPA647_bis.lif_.lif	Cav1KO_Control_9EG7_488_LBPA647_Vero_settings	Ch_Reference_actBCh_AND_Ch_DextranCh	0.482	1.05679	0.865	0.932	0.367	0; 0	0; 0\n
Cav1WTvsKORab11124DN9EG7488LBPA647_bis.lif_.lif	Cav1KO_Control_9EG7_488_LBPA647_Vero_settings_2	Ch_Reference_actBCh_AND_Ch_DextranCh	0.505	1.10721	0.914	0.964	0.361	0; 0	0; 0\n
Cav1WTvsKORab11124DN9EG7488LBPA647_bis.lif_.lif	Cav1KO_Control_9EG7_488_LBPA647_Vero_settings_3	Ch_Reference_actBCh_AND_Ch_DextranCh	0.373	0.817803	0.889	0.959	0.344	0; 0	0; 0\n
Cav1WTvsKORab11124DN9EG7488LBPA647_bis.lif_.lif	Cav1KO_Control_9EG7_488_LBPA647_Vero_settings_4	Ch_Reference_actBCh_AND_Ch_DextranCh	0.519	1.13791	0.915	0.962	0.365	0; 0	0; 0\n
Cav1WTvsKORab11124DN9EG7488LBPA647_bis.lif_.lif	Cav1KO_Control_9EG7_488_LBPA647_Vero_settings_5	Ch_Reference_actBCh_AND_Ch_DextranCh	0.56	1.2278	0.934	0.974	0.286	0; 0	0; 0\n
Cav1WTvsKORab11124DN9EG7488LBPA647_bis.lif_.lif	Cav1KO_Control_9EG7_488_LBPA647_Vero_settings_6	Ch_Reference_actBCh_AND_Ch_DextranCh	0.588	1.28919	0.833	0.921	0.373	0; 0	0; 0\n
Cav1WTvsKORab11124DN9EG7488LBPA647_bis.lif_.lif	Cav1KO_Control_9EG7_488_LBPA647_Vero_settings_7	Ch_Reference_actBCh_AND_Ch_DextranCh	0.452	0.991011	0.848	0.939	0.337	0; 0	0; 0\n
Cav1WTvsKORab11124DN9EG7488LBPA647_bis.lif_.lif	Cav1KO_Control_9EG7_488_LBPA647_Vero_settings_8	Ch_Reference_actBCh_AND_Ch_DextranCh	0.436	0.955931	0.886	0.962	0.384	0; 0	0; 0\n
Cav1WTvsKORab11124DN9EG7488LBPA647_bis.lif_.lif	Cav1KO_Control_9EG7_488_LBPA647_Vero_settings_9	Ch_Reference_actBCh_AND_Ch_DextranCh	0.48	1.0524	0.891	0.96	0.403	0; 0	0; 0\n
Cav1WTvsKORab11124DN9EG7488LBPA647_bis.lif_.lif	Cav1KO_Control_9EG7_488_LBPA647_Vero_settings_10	Ch_Reference_actBCh_AND_Ch_DextranCh	0.534	1.1708	0.842	0.938	0.396	0; 0	0; 0\n
Cav1WTvsKORab11124DN9EG7488LBPA647.lif	Cav1KO_Control_9EG7_488_LBPA647_Vero_settings_11	Ch_Reference_actBCh_AND_Ch_DextranCh	0.464	1.01732	0.919	0.94	0.395	0; 0	0; 0\n
Cav1WTvsKORab11124DN9EG7488LBPA647.lif	Cav1KO_Control_9EG7_488_LBPA647_Vero_settings_12	Ch_Reference_actBCh_AND_Ch_DextranCh	0.377	0.826573	0.936	0.958	0.346	0; 0	0; 0\n
Cav1WTvsKORab11124DN9EG7488LBPA647.lif	Cav1KO_Control_9EG7_488_LBPA647_Vero_settings_13	Ch_Reference_actBCh_AND_Ch_DextranCh	0.387	0.848498	0.908	0.946	0.399	0; 0	0; 0\n
Cav1WTvsKORab11124DN9EG7488LBPA647.lif	Cav1KO_Control_9EG7_488_LBPA647_Vero_settings_14	Ch_Reference_actBCh_AND_Ch_DextranCh	0.504	1.10502	0.94	0.962	0.375	0; 0	0; 0\n
Cav1WTvsKORab11124DN9EG7488LBPA647.lif	Cav1KO_Control_9EG7_488_LBPA647_Vero_settings_15	Ch_Reference_actBCh_AND_Ch_DextranCh	0.314	0.688446	0.922	0.953	0.362	0; 0	0; 0\n
Cav1WTvsKORab11124DN9EG7488LBPA647.lif	Cav1KO_Control_9EG7_488_LBPA647_Vero_settings_16	Ch_Reference_actBCh_AND_Ch_DextranCh	0.537	1.17737	0.914	0.939	0.41	0; 0	0; 0\n
Cav1WTvsKORab11124DN9EG7488LBPA647.lif	Cav1KO_Control_9EG7_488_LBPA647_Vero_settings_17	Ch_Reference_actBCh_AND_Ch_DextranCh	0.457	1.00197	0.945	0.966	0.343	0; 0	0; 0\n
Cav1WTvsKORab11124DN9EG7488LBPA647.lif	Cav1KO_Control_9EG7_488_LBPA647_Vero_settings_18	Ch_Reference_actBCh_AND_Ch_DextranCh	0.352	0.771761	0.921	0.953	0.335	0; 0	0; 0\n
Cav1WTvsKORab11124DN9EG7488LBPA647.lif	Cav1KO_Control_9EG7_488_LBPA647_Vero_settings_19	Ch_Reference_actBCh_AND_Ch_DextranCh	0.342	0.749836	0.931	0.96	0.364	0; 0	0; 0\n
Cav1WTvsKORab11124DN9EG7488LBPA647.lif	Cav1KO_Control_9EG7_488_LBPA647_Vero_settings_20	Ch_Reference_actBCh_AND_Ch_DextranCh	0.459	1.00636	0.931	0.954	0.362	0; 0	0; 0\n
Cav1WTvsKORab11124DN9EG7488LBPA647_bis.lif_.lif	Cav1KO_Rab11_124DN_9EG7_488_LBPA647_Vero_settings	Ch_Reference_actBCh_AND_Ch_DextranCh	0.501	1.09844	0.878	0.914	0.35	0; 0	0; 0\n
Cav1WTvsKORab11124DN9EG7488LBPA647_bis.lif_.lif	Cav1KO_Rab11_124DN_9EG7_488_LBPA647_Vero_settings_2	Ch_Reference_actBCh_AND_Ch_DextranCh	0.556	1.21903	0.88	0.905	0.372	0; 0	0; 0\n
Cav1WTvsKORab11124DN9EG7488LBPA647_bis.lif_.lif	Cav1KO_Rab11_124DN_9EG7_488_LBPA647_Vero_settings_3	Ch_Reference_actBCh_AND_Ch_DextranCh	0.458	1.00417	0.892	0.934	0.38	0; 0	0; 0\n
Cav1WTvsKORab11124DN9EG7488LBPA647_bis.lif_.lif	Cav1KO_Rab11_124DN_9EG7_488_LBPA647_Vero_settings_4	Ch_Reference_actBCh_AND_Ch_DextranCh	0.574	1.2585	0.906	0.944	0.404	0; 0	0; 0\n
Cav1WTvsKORab11124DN9EG7488LBPA647_bis.lif_.lif	Cav1KO_Rab11_124DN_9EG7_488_LBPA647_Vero_settings_5	Ch_Reference_actBCh_AND_Ch_DextranCh	0.554	1.21465	0.881	0.959	0.402	0; 0	0; 0\n
Cav1WTvsKORab11124DN9EG7488LBPA647_bis.lif_.lif	Cav1KO_Rab11_124DN_9EG7_488_LBPA647_Vero_settings_6	Ch_Reference_actBCh_AND_Ch_DextranCh	0.504	1.10502	0.884	0.962	0.358	0; 0	0; 0\n
Cav1WTvsKORab11124DN9EG7488LBPA647_bis.lif_.lif	Cav1KO_Rab11_124DN_9EG7_488_LBPA647_Vero_settings_7	Ch_Reference_actBCh_AND_Ch_DextranCh	0.574	1.2585	0.904	0.969	0.35	0; 0	0; 0\n
Cav1WTvsKORab11124DN9EG7488LBPA647_bis.lif_.lif	Cav1KO_Rab11_124DN_9EG7_488_LBPA647_Vero_settings_8	Ch_Reference_actBCh_AND_Ch_DextranCh	0.591	1.29577	0.913	0.959	0.374	0; 0	0; 0\n
Cav1WTvsKORab11124DN9EG7488LBPA647_bis.lif_.lif	Cav1KO_Rab11_124DN_9EG7_488_LBPA647_Vero_settings_9	Ch_Reference_actBCh_AND_Ch_DextranCh	0.581	1.27384	0.899	0.952	0.372	0; 0	0; 0\n
Cav1WTvsKORab11124DN9EG7488LBPA647_bis.lif_.lif	Cav1KO_Rab11_124DN_9EG7_488_LBPA647_Vero_settings_10	Ch_Reference_actBCh_AND_Ch_DextranCh	0.538	1.17957	0.907	0.969	0.347	0; 0	0; 0\n
Cav1WTvsKORab11124DN9EG7488LBPA647.lif	Cav1KO_Rab11_124DN_9EG7_488_LBPA647_Vero_settings_11	Ch_Reference_actBCh_AND_Ch_DextranCh	0.526	1.15326	0.942	0.97	0.339	0; 0	0; 0\n
Cav1WTvsKORab11124DN9EG7488LBPA647.lif	Cav1KO_Rab11_124DN_9EG7_488_LBPA647_Vero_settings_12	Ch_Reference_actBCh_AND_Ch_DextranCh	0.505	1.10721	0.954	0.975	0.293	0; 0	0; 0\n
Cav1WTvsKORab11124DN9EG7488LBPA647.lif	Cav1KO_Rab11_124DN_9EG7_488_LBPA647_Vero_settings_13	Ch_Reference_actBCh_AND_Ch_DextranCh	0.536	1.17518	0.939	0.956	0.356	0; 0	0; 0\n
Cav1WTvsKORab11124DN9EG7488LBPA647.lif	Cav1KO_Rab11_124DN_9EG7_488_LBPA647_Vero_settings_14	Ch_Reference_actBCh_AND_Ch_DextranCh	0.622	1.36374	0.941	0.953	0.379	0; 0	0; 0\n
Cav1WTvsKORab11124DN9EG7488LBPA647.lif	Cav1KO_Rab11_124DN_9EG7_488_LBPA647_Vero_settings_15	Ch_Reference_actBCh_AND_Ch_DextranCh	0.619	1.35716	0.929	0.952	0.397	0; 0	0; 0\n
Cav1WTvsKORab11124DN9EG7488LBPA647.lif	Cav1KO_Rab11_124DN_9EG7_488_LBPA647_Vero_settings_16	Ch_Reference_actBCh_AND_Ch_DextranCh	0.419	0.918658	0.9	0.946	0.372	0; 0	0; 0\n
Cav1WTvsKORab11124DN9EG7488LBPA647.lif	Cav1KO_Rab11_124DN_9EG7_488_LBPA647_Vero_settings_17	Ch_Reference_actBCh_AND_Ch_DextranCh	0.503	1.10283	0.936	0.972	0.357	0; 0	0; 0\n
Cav1WTvsKORab11124DN9EG7488LBPA647.lif	Cav1KO_Rab11_124DN_9EG7_488_LBPA647_Vero_settings_18	Ch_Reference_actBCh_AND_Ch_DextranCh	0.545	1.19491	0.887	0.938	0.395	0; 0	0; 0\n
Cav1WTvsKORab11124DN9EG7488LBPA647.lif	Cav1KO_Rab11_124DN_9EG7_488_LBPA647_Vero_settings_19	Ch_Reference_actBCh_AND_Ch_DextranCh	0.429	0.940583	0.916	0.947	0.363	0; 0	0; 0\n
Cav1WTvsKORab11124DN9EG7488LBPA647.lif	Cav1KO_Rab11_124DN_9EG7_488_LBPA647_Vero_settings_20	Ch_Reference_actBCh_AND_Ch_DextranCh	0.53	1.16203	0.904	0.947	0.375	0; 0	0; 0\n

## Sheet: Colocalization 48h Figure 6O
Image	Pearson Coefficient	Normalized by Mean Control		Image	Pearson Coefficient	Normalized by Mean Control
C1-Cav1KO_Control_Rab4_48h_9EG7-488_EEA-1_647.lsm-crop and C2-Cav1KO_Control_Rab4_48h_9EG7-488_EEA-1_647.lsm-crop x 0 y0 w407 h269	0.25	1.44837		C1-Cav1WT_Control_Rab4_48h_9EG7-488_EEA-1_647.lsm-crop and C2-Cav1WT_Control_Rab4_48h_9EG7-488_EEA-1_647.lsm-crop x 0 y0 w1024 h1024	0.138	0.662442
C1-Cav1KO_Control_Rab4_48h_9EG7-488_EEA-1_647_10.lsm-crop and C2-Cav1KO_Control_Rab4_48h_9EG7-488_EEA-1_647_10.lsm-crop x 0 y0 w323 h147	0.133	0.770533		C1-Cav1WT_Control_Rab4_48h_9EG7-488_EEA-1_647_10.lsm-crop and C2-Cav1WT_Control_Rab4_48h_9EG7-488_EEA-1_647_10.lsm-crop x 0 y0 w525 h287	0.273	1.31048
C1-Cav1KO_Control_Rab4_48h_9EG7-488_EEA-1_647_11.lsm-crop and C2-Cav1KO_Control_Rab4_48h_9EG7-488_EEA-1_647_11.lsm-crop x 0 y0 w230 h171	0.238	1.37885		C1-Cav1WT_Control_Rab4_48h_9EG7-488_EEA-1_647_11.lsm-crop and C2-Cav1WT_Control_Rab4_48h_9EG7-488_EEA-1_647_11.lsm-crop x 0 y0 w742 h414	0.071	0.340822
C1-Cav1KO_Control_Rab4_48h_9EG7-488_EEA-1_647_12.lsm-crop and C2-Cav1KO_Control_Rab4_48h_9EG7-488_EEA-1_647_12.lsm-crop x 0 y0 w521 h370	0.261	1.5121		C1-Cav1WT_Control_Rab4_48h_9EG7-488_EEA-1_647_12.lsm-crop and C2-Cav1WT_Control_Rab4_48h_9EG7-488_EEA-1_647_12.lsm-crop x 0 y0 w417 h361	0.362	1.73771
C1-Cav1KO_Control_Rab4_48h_9EG7-488_EEA-1_647_13.lsm-crop and C2-Cav1KO_Control_Rab4_48h_9EG7-488_EEA-1_647_13.lsm-crop x 0 y0 w213 h128	0.212	1.22822		C1-Cav1WT_Control_Rab4_48h_9EG7-488_EEA-1_647_13.lsm-crop and C2-Cav1WT_Control_Rab4_48h_9EG7-488_EEA-1_647_13.lsm-crop x 0 y0 w355 h366	0.308	1.47849
C1-Cav1KO_Control_Rab4_48h_9EG7-488_EEA-1_647_14.lsm-crop and C2-Cav1KO_Control_Rab4_48h_9EG7-488_EEA-1_647_14.lsm-crop x 0 y0 w388 h220	0.167	0.967511		C1-Cav1WT_Control_Rab4_48h_9EG7-488_EEA-1_647_14.lsm-crop and C2-Cav1WT_Control_Rab4_48h_9EG7-488_EEA-1_647_14.lsm-crop x 0 y0 w657 h421	0.007	0.0336022
C1-Cav1KO_Control_Rab4_48h_9EG7-488_EEA-1_647_15.lsm-crop and C2-Cav1KO_Control_Rab4_48h_9EG7-488_EEA-1_647_15.lsm-crop x 0 y0 w303 h186	0.185	1.07179		C1-Cav1WT_Control_Rab4_48h_9EG7-488_EEA-1_647_15.lsm-crop and C2-Cav1WT_Control_Rab4_48h_9EG7-488_EEA-1_647_15.lsm-crop x 0 y0 w586 h511	0.112	0.537634
C1-Cav1KO_Control_Rab4_48h_9EG7-488_EEA-1_647_16.lsm-crop and C2-Cav1KO_Control_Rab4_48h_9EG7-488_EEA-1_647_16.lsm-crop x 0 y0 w431 h291	0.181	1.04862		C1-Cav1WT_Control_Rab4_48h_9EG7-488_EEA-1_647_16.lsm-crop and C2-Cav1WT_Control_Rab4_48h_9EG7-488_EEA-1_647_16.lsm-crop x 0 y0 w453 h450	0.111	0.532834
C1-Cav1KO_Control_Rab4_48h_9EG7-488_EEA-1_647_17.lsm-crop and C2-Cav1KO_Control_Rab4_48h_9EG7-488_EEA-1_647_17.lsm-crop x 0 y0 w204 h169	0.256	1.48313		C1-Cav1WT_Control_Rab4_48h_9EG7-488_EEA-1_647_17.lsm-crop and C2-Cav1WT_Control_Rab4_48h_9EG7-488_EEA-1_647_17.lsm-crop x 0 y0 w488 h358	0.504	2.41935
C1-Cav1KO_Control_Rab4_48h_9EG7-488_EEA-1_647_18.lsm-crop and C2-Cav1KO_Control_Rab4_48h_9EG7-488_EEA-1_647_18.lsm-crop x 0 y0 w307 h138	0.21	1.21663		C1-Cav1WT_Control_Rab4_48h_9EG7-488_EEA-1_647_18.lsm-crop and C2-Cav1WT_Control_Rab4_48h_9EG7-488_EEA-1_647_18.lsm-crop x 0 y0 w332 h250	0.113	0.542435
C1-Cav1KO_Control_Rab4_48h_9EG7-488_EEA-1_647_19.lsm-crop and C2-Cav1KO_Control_Rab4_48h_9EG7-488_EEA-1_647_19.lsm-crop x 0 y0 w222 h166	0.214	1.2398		C1-Cav1WT_Control_Rab4_48h_9EG7-488_EEA-1_647_19.lsm-crop and C2-Cav1WT_Control_Rab4_48h_9EG7-488_EEA-1_647_19.lsm-crop x 0 y0 w901 h583	0.156	0.748848
C1-Cav1KO_Control_Rab4_48h_9EG7-488_EEA-1_647_2.lsm-crop and C2-Cav1KO_Control_Rab4_48h_9EG7-488_EEA-1_647_2.lsm-crop x 0 y0 w282 h239	0.26	1.5063		C1-Cav1WT_Control_Rab4_48h_9EG7-488_EEA-1_647_2.lsm-crop and C2-Cav1WT_Control_Rab4_48h_9EG7-488_EEA-1_647_2.lsm-crop x 0 y0 w581 h403	0.189	0.907258
C1-Cav1KO_Control_Rab4_48h_9EG7-488_EEA-1_647_20.lsm-crop and C2-Cav1KO_Control_Rab4_48h_9EG7-488_EEA-1_647_20.lsm-crop x 0 y0 w273 h121	0.244	1.41361		C1-Cav1WT_Control_Rab4_48h_9EG7-488_EEA-1_647_20.lsm-crop and C2-Cav1WT_Control_Rab4_48h_9EG7-488_EEA-1_647_20.lsm-crop x 0 y0 w483 h613	0.211	1.01286
C1-Cav1KO_Control_Rab4_48h_9EG7-488_EEA-1_647_21.lsm-crop and C2-Cav1KO_Control_Rab4_48h_9EG7-488_EEA-1_647_21.lsm-crop x 0 y0 w388 h257	0.301	1.74384		C1-Cav1WT_Control_Rab4_48h_9EG7-488_EEA-1_647_21.lsm-crop and C2-Cav1WT_Control_Rab4_48h_9EG7-488_EEA-1_647_21.lsm-crop x 0 y0 w652 h497	0.156	0.748848
C1-Cav1KO_Control_Rab4_48h_9EG7-488_EEA-1_647_22.lsm-crop and C2-Cav1KO_Control_Rab4_48h_9EG7-488_EEA-1_647_22.lsm-crop x 0 y0 w353 h222	0.199	1.1529		C1-Cav1WT_Control_Rab4_48h_9EG7-488_EEA-1_647_22.lsm-crop and C2-Cav1WT_Control_Rab4_48h_9EG7-488_EEA-1_647_22.lsm-crop x 0 y0 w656 h332	0.176	0.844854
C1-Cav1KO_Control_Rab4_48h_9EG7-488_EEA-1_647_23.lsm-crop and C2-Cav1KO_Control_Rab4_48h_9EG7-488_EEA-1_647_23.lsm-crop x 0 y0 w395 h352	0.23	1.3325		C1-Cav1WT_Control_Rab4_48h_9EG7-488_EEA-1_647_23.lsm-crop and C2-Cav1WT_Control_Rab4_48h_9EG7-488_EEA-1_647_23.lsm-crop x 0 y0 w497 h353	0.287	1.37769
C1-Cav1KO_Control_Rab4_48h_9EG7-488_EEA-1_647_24.lsm-crop and C2-Cav1KO_Control_Rab4_48h_9EG7-488_EEA-1_647_24.lsm-crop x 0 y0 w570 h324	0.148	0.857435		C1-Cav1WT_Control_Rab4_48h_9EG7-488_EEA-1_647_24.lsm-crop and C2-Cav1WT_Control_Rab4_48h_9EG7-488_EEA-1_647_24.lsm-crop x 0 y0 w464 h449	0.343	1.64651
C1-Cav1KO_Control_Rab4_48h_9EG7-488_EEA-1_647_25.lsm-crop and C2-Cav1KO_Control_Rab4_48h_9EG7-488_EEA-1_647_25.lsm-crop x 0 y0 w408 h225	0.324	1.87709		C1-Cav1WT_Control_Rab4_48h_9EG7-488_EEA-1_647_25.lsm-crop and C2-Cav1WT_Control_Rab4_48h_9EG7-488_EEA-1_647_25.lsm-crop x 0 y0 w774 h406	0.185	0.888057
C1-Cav1KO_Control_Rab4_48h_9EG7-488_EEA-1_647_26.lsm-crop and C2-Cav1KO_Control_Rab4_48h_9EG7-488_EEA-1_647_26.lsm-crop x 0 y0 w258 h366	0.071	0.411337		C1-Cav1WT_Control_Rab4_48h_9EG7-488_EEA-1_647_3.lsm-crop and C2-Cav1WT_Control_Rab4_48h_9EG7-488_EEA-1_647_3.lsm-crop x 0 y0 w500 h403	0.258	1.23848
C1-Cav1KO_Control_Rab4_48h_9EG7-488_EEA-1_647_3.lsm-crop and C2-Cav1KO_Control_Rab4_48h_9EG7-488_EEA-1_647_3.lsm-crop x 0 y0 w316 h167	0.197	1.14132		C1-Cav1WT_Control_Rab4_48h_9EG7-488_EEA-1_647_4.lsm-crop and C2-Cav1WT_Control_Rab4_48h_9EG7-488_EEA-1_647_4.lsm-crop x 0 y0 w341 h253	0.212	1.01767
C1-Cav1KO_Control_Rab4_48h_9EG7-488_EEA-1_647_4.lsm-crop and C2-Cav1KO_Control_Rab4_48h_9EG7-488_EEA-1_647_4.lsm-crop x 0 y0 w386 h144	0.224	1.29774		C1-Cav1WT_Control_Rab4_48h_9EG7-488_EEA-1_647_5.lsm-crop and C2-Cav1WT_Control_Rab4_48h_9EG7-488_EEA-1_647_5.lsm-crop x 0 y0 w670 h438	0.198	0.950461
C1-Cav1KO_Control_Rab4_48h_9EG7-488_EEA-1_647_5.lsm-crop and C2-Cav1KO_Control_Rab4_48h_9EG7-488_EEA-1_647_5.lsm-crop x 0 y0 w258 h234	0.314	1.81915		C1-Cav1WT_Control_Rab4_48h_9EG7-488_EEA-1_647_6.lsm-crop and C2-Cav1WT_Control_Rab4_48h_9EG7-488_EEA-1_647_6.lsm-crop x 0 y0 w327 h261	0.303	1.45449
C1-Cav1KO_Control_Rab4_48h_9EG7-488_EEA-1_647_6.lsm-crop and C2-Cav1KO_Control_Rab4_48h_9EG7-488_EEA-1_647_6.lsm-crop x 0 y0 w363 h247	0.181	1.04862		C1-Cav1WT_Control_Rab4_48h_9EG7-488_EEA-1_647_7.lsm-crop and C2-Cav1WT_Control_Rab4_48h_9EG7-488_EEA-1_647_7.lsm-crop x 0 y0 w496 h245	0.174	0.835253
C1-Cav1KO_Control_Rab4_48h_9EG7-488_EEA-1_647_7.lsm-crop and C2-Cav1KO_Control_Rab4_48h_9EG7-488_EEA-1_647_7.lsm-crop x 0 y0 w200 h183	0.169	0.979098		C1-Cav1WT_Control_Rab4_48h_9EG7-488_EEA-1_647_8.lsm-crop and C2-Cav1WT_Control_Rab4_48h_9EG7-488_EEA-1_647_8.lsm-crop x 0 y0 w640 h402	0.202	0.969662
C1-Cav1KO_Control_Rab4_48h_9EG7-488_EEA-1_647_8.lsm-crop and C2-Cav1KO_Control_Rab4_48h_9EG7-488_EEA-1_647_8.lsm-crop x 0 y0 w363 h273	0.264	1.52948		C1-Cav1WT_Control_Rab4_48h_9EG7-488_EEA-1_647_9.lsm-crop and C2-Cav1WT_Control_Rab4_48h_9EG7-488_EEA-1_647_9.lsm-crop x 0 y0 w538 h331	0.159	0.763249
C1-Cav1KO_Control_Rab4_48h_9EG7-488_EEA-1_647_9.lsm-crop and C2-Cav1KO_Control_Rab4_48h_9EG7-488_EEA-1_647_9.lsm-crop x 0 y0 w352 h131	0.194	1.12394
C1-Cav1KO_Control_Rab4_48h_9EG7-488_EEA-1_647.lsm-crop and C2-Cav1KO_Control_Rab4_48h_9EG7-488_EEA-1_647.lsm-crop x 0 y0 w982 h586	0.141	0.816881
C1-Cav1KO_Control_Rab4_48h_9EG7-488_EEA-1_647_10.lsm-crop and C2-Cav1KO_Control_Rab4_48h_9EG7-488_EEA-1_647_10.lsm-crop x 0 y0 w611 h515	0.079	0.457685
C1-Cav1KO_Control_Rab4_48h_9EG7-488_EEA-1_647_11.lsm-crop and C2-Cav1KO_Control_Rab4_48h_9EG7-488_EEA-1_647_11.lsm-crop x 0 y0 w1024 h777	0.168	0.973305
C1-Cav1KO_Control_Rab4_48h_9EG7-488_EEA-1_647_12.lsm-crop and C2-Cav1KO_Control_Rab4_48h_9EG7-488_EEA-1_647_12.lsm-crop x 0 y0 w974 h413	0.241	1.39623
C1-Cav1KO_Control_Rab4_48h_9EG7-488_EEA-1_647_13.lsm-crop and C2-Cav1KO_Control_Rab4_48h_9EG7-488_EEA-1_647_13.lsm-crop x 0 y0 w447 h400	0.149	0.863228
C1-Cav1KO_Control_Rab4_48h_9EG7-488_EEA-1_647_14.lsm-crop and C2-Cav1KO_Control_Rab4_48h_9EG7-488_EEA-1_647_14.lsm-crop x 0 y0 w645 h676	0.126	0.729978
C1-Cav1KO_Control_Rab4_48h_9EG7-488_EEA-1_647_15.lsm-crop and C2-Cav1KO_Control_Rab4_48h_9EG7-488_EEA-1_647_15.lsm-crop x 0 y0 w481 h288	0.238	1.37885
C1-Cav1KO_Control_Rab4_48h_9EG7-488_EEA-1_647_16.lsm-crop and C2-Cav1KO_Control_Rab4_48h_9EG7-488_EEA-1_647_16.lsm-crop x 0 y0 w618 h478	0.079	0.457685
C1-Cav1KO_Control_Rab4_48h_9EG7-488_EEA-1_647_17.lsm-crop and C2-Cav1KO_Control_Rab4_48h_9EG7-488_EEA-1_647_17.lsm-crop x 0 y0 w991 h1008	0.112	0.64887
C1-Cav1KO_Control_Rab4_48h_9EG7-488_EEA-1_647_18.lsm-crop and C2-Cav1KO_Control_Rab4_48h_9EG7-488_EEA-1_647_18.lsm-crop x 0 y0 w798 h556	0.127	0.735772
C1-Cav1KO_Control_Rab4_48h_9EG7-488_EEA-1_647_19.lsm-crop and C2-Cav1KO_Control_Rab4_48h_9EG7-488_EEA-1_647_19.lsm-crop x 0 y0 w1024 h736	0.073	0.422924
C1-Cav1KO_Control_Rab4_48h_9EG7-488_EEA-1_647_2.lsm-crop and C2-Cav1KO_Control_Rab4_48h_9EG7-488_EEA-1_647_2.lsm-crop x 0 y0 w774 h585	0.13	0.753152
C1-Cav1KO_Control_Rab4_48h_9EG7-488_EEA-1_647_20.lsm-crop and C2-Cav1KO_Control_Rab4_48h_9EG7-488_EEA-1_647_20.lsm-crop x 0 y0 w693 h464	0.096	0.556174
C1-Cav1KO_Control_Rab4_48h_9EG7-488_EEA-1_647_21.lsm-crop and C2-Cav1KO_Control_Rab4_48h_9EG7-488_EEA-1_647_21.lsm-crop x 0 y0 w995 h761	0.14	0.811087
C1-Cav1KO_Control_Rab4_48h_9EG7-488_EEA-1_647_22.lsm-crop and C2-Cav1KO_Control_Rab4_48h_9EG7-488_EEA-1_647_22.lsm-crop x 0 y0 w758 h557	0.212	1.22822
C1-Cav1KO_Control_Rab4_48h_9EG7-488_EEA-1_647_23.lsm-crop and C2-Cav1KO_Control_Rab4_48h_9EG7-488_EEA-1_647_23.lsm-crop x 0 y0 w804 h530	0.124	0.718391
C1-Cav1KO_Control_Rab4_48h_9EG7-488_EEA-1_647_24.lsm-crop and C2-Cav1KO_Control_Rab4_48h_9EG7-488_EEA-1_647_24.lsm-crop x 0 y0 w852 h683	0.133	0.770533
C1-Cav1KO_Control_Rab4_48h_9EG7-488_EEA-1_647_25.lsm-crop and C2-Cav1KO_Control_Rab4_48h_9EG7-488_EEA-1_647_25.lsm-crop x 0 y0 w878 h741	0.2	1.1587
C1-Cav1KO_Control_Rab4_48h_9EG7-488_EEA-1_647_3.lsm-crop and C2-Cav1KO_Control_Rab4_48h_9EG7-488_EEA-1_647_3.lsm-crop x 0 y0 w1024 h825	0.097	0.561968
C1-Cav1KO_Control_Rab4_48h_9EG7-488_EEA-1_647_4.lsm-crop and C2-Cav1KO_Control_Rab4_48h_9EG7-488_EEA-1_647_4.lsm-crop x 0 y0 w859 h756	0.075	0.434511
C1-Cav1KO_Control_Rab4_48h_9EG7-488_EEA-1_647_5.lsm-crop and C2-Cav1KO_Control_Rab4_48h_9EG7-488_EEA-1_647_5.lsm-crop x 0 y0 w1024 h1024	0.072	0.417131
C1-Cav1KO_Control_Rab4_48h_9EG7-488_EEA-1_647_6.lsm-crop and C2-Cav1KO_Control_Rab4_48h_9EG7-488_EEA-1_647_6.lsm-crop x 0 y0 w835 h330	0.051	0.295467
C1-Cav1KO_Control_Rab4_48h_9EG7-488_EEA-1_647_7.lsm-crop and C2-Cav1KO_Control_Rab4_48h_9EG7-488_EEA-1_647_7.lsm-crop x 0 y0 w827 h383	0.054	0.312848
C1-Cav1KO_Control_Rab4_48h_9EG7-488_EEA-1_647_8.lsm-crop and C2-Cav1KO_Control_Rab4_48h_9EG7-488_EEA-1_647_8.lsm-crop x 0 y0 w1010 h295	0.066	0.38237
C1-Cav1KO_Control_Rab4_48h_9EG7-488_EEA-1_647_9.lsm-crop and C2-Cav1KO_Control_Rab4_48h_9EG7-488_EEA-1_647_9.lsm-crop x 0 y0 w837 h489	0.193	1.11814
Average	0.172608	1		Average	0.20832	1
SEM	0.0100506	0.0582281		SEM	0.0209883	0.10075
C1-Cav1KO_Rab4DN_S22N_48h_9EG7-488_EEA-1_647.lsm-crop and C2-Cav1KO_Rab4DN_S22N_48h_9EG7-488_EEA-1_647.lsm-crop x 0 y0 w120 h121	0.341	1.97558		C1-Cav1WT_Rab4DN_S22N_48h_9EG7-488_EEA-1_647.lsm-crop and C2-Cav1WT_Rab4DN_S22N_48h_9EG7-488_EEA-1_647.lsm-crop x 0 y0 w888 h485	0.078	0.374424
C1-Cav1KO_Rab4DN_S22N_48h_9EG7-488_EEA-1_647_10.lsm-crop and C2-Cav1KO_Rab4DN_S22N_48h_9EG7-488_EEA-1_647_10.lsm-crop x 0 y0 w364 h233	0.225	1.30353		C1-Cav1WT_Rab4DN_S22N_48h_9EG7-488_EEA-1_647_10.lsm-crop and C2-Cav1WT_Rab4DN_S22N_48h_9EG7-488_EEA-1_647_10.lsm-crop x 0 y0 w326 h294	0.046	0.220814
C1-Cav1KO_Rab4DN_S22N_48h_9EG7-488_EEA-1_647_11.lsm-crop and C2-Cav1KO_Rab4DN_S22N_48h_9EG7-488_EEA-1_647_11.lsm-crop x 0 y0 w233 h203	0.237	1.37305		C1-Cav1WT_Rab4DN_S22N_48h_9EG7-488_EEA-1_647_11.lsm-crop and C2-Cav1WT_Rab4DN_S22N_48h_9EG7-488_EEA-1_647_11.lsm-crop x 0 y0 w608 h732	0.535	2.56816
C1-Cav1KO_Rab4DN_S22N_48h_9EG7-488_EEA-1_647_12.lsm-crop and C2-Cav1KO_Rab4DN_S22N_48h_9EG7-488_EEA-1_647_12.lsm-crop x 0 y0 w310 h187	0.21	1.21663		C1-Cav1WT_Rab4DN_S22N_48h_9EG7-488_EEA-1_647_12.lsm-crop and C2-Cav1WT_Rab4DN_S22N_48h_9EG7-488_EEA-1_647_12.lsm-crop x 0 y0 w374 h240	0.127	0.609639
C1-Cav1KO_Rab4DN_S22N_48h_9EG7-488_EEA-1_647_13.lsm-crop and C2-Cav1KO_Rab4DN_S22N_48h_9EG7-488_EEA-1_647_13.lsm-crop x 0 y0 w565 h328	0.352	2.0393		C1-Cav1WT_Rab4DN_S22N_48h_9EG7-488_EEA-1_647_13.lsm-crop and C2-Cav1WT_Rab4DN_S22N_48h_9EG7-488_EEA-1_647_13.lsm-crop x 0 y0 w376 h295	0.247	1.18568
C1-Cav1KO_Rab4DN_S22N_48h_9EG7-488_EEA-1_647_14.lsm-crop and C2-Cav1KO_Rab4DN_S22N_48h_9EG7-488_EEA-1_647_14.lsm-crop x 0 y0 w365 h224	0.304	1.76122		C1-Cav1WT_Rab4DN_S22N_48h_9EG7-488_EEA-1_647_14.lsm-crop and C2-Cav1WT_Rab4DN_S22N_48h_9EG7-488_EEA-1_647_14.lsm-crop x 0 y0 w496 h422	0.137	0.657642
C1-Cav1KO_Rab4DN_S22N_48h_9EG7-488_EEA-1_647_15.lsm-crop and C2-Cav1KO_Rab4DN_S22N_48h_9EG7-488_EEA-1_647_15.lsm-crop x 0 y0 w330 h243	0.241	1.39623		C1-Cav1WT_Rab4DN_S22N_48h_9EG7-488_EEA-1_647_15.lsm-crop and C2-Cav1WT_Rab4DN_S22N_48h_9EG7-488_EEA-1_647_15.lsm-crop x 0 y0 w445 h465	0.412	1.97773
C1-Cav1KO_Rab4DN_S22N_48h_9EG7-488_EEA-1_647_16.lsm-crop and C2-Cav1KO_Rab4DN_S22N_48h_9EG7-488_EEA-1_647_16.lsm-crop x 0 y0 w480 h276	0.394	2.28263		C1-Cav1WT_Rab4DN_S22N_48h_9EG7-488_EEA-1_647_16.lsm-crop and C2-Cav1WT_Rab4DN_S22N_48h_9EG7-488_EEA-1_647_16.lsm-crop x 0 y0 w459 h392	0.247	1.18568
C1-Cav1KO_Rab4DN_S22N_48h_9EG7-488_EEA-1_647_17.lsm-crop and C2-Cav1KO_Rab4DN_S22N_48h_9EG7-488_EEA-1_647_17.lsm-crop x 0 y0 w211 h110	0.414	2.3985		C1-Cav1WT_Rab4DN_S22N_48h_9EG7-488_EEA-1_647_17.lsm-crop and C2-Cav1WT_Rab4DN_S22N_48h_9EG7-488_EEA-1_647_17.lsm-crop x 0 y0 w466 h491	0.405	1.94412
C1-Cav1KO_Rab4DN_S22N_48h_9EG7-488_EEA-1_647_18.lsm-crop and C2-Cav1KO_Rab4DN_S22N_48h_9EG7-488_EEA-1_647_18.lsm-crop x 0 y0 w211 h137	0.352	2.0393		C1-Cav1WT_Rab4DN_S22N_48h_9EG7-488_EEA-1_647_18.lsm-crop and C2-Cav1WT_Rab4DN_S22N_48h_9EG7-488_EEA-1_647_18.lsm-crop x 0 y0 w598 h522	0.159	0.763249
C1-Cav1KO_Rab4DN_S22N_48h_9EG7-488_EEA-1_647_19.lsm-crop and C2-Cav1KO_Rab4DN_S22N_48h_9EG7-488_EEA-1_647_19.lsm-crop x 0 y0 w368 h155	0.38	2.20152		C1-Cav1WT_Rab4DN_S22N_48h_9EG7-488_EEA-1_647_19.lsm-crop and C2-Cav1WT_Rab4DN_S22N_48h_9EG7-488_EEA-1_647_19.lsm-crop x 0 y0 w714 h569	0.243	1.16647
C1-Cav1KO_Rab4DN_S22N_48h_9EG7-488_EEA-1_647_2.lsm-crop and C2-Cav1KO_Rab4DN_S22N_48h_9EG7-488_EEA-1_647_2.lsm-crop x 0 y0 w278 h202	0.31	1.79598		C1-Cav1WT_Rab4DN_S22N_48h_9EG7-488_EEA-1_647_2.lsm-crop and C2-Cav1WT_Rab4DN_S22N_48h_9EG7-488_EEA-1_647_2.lsm-crop x 0 y0 w720 h634	0.425	2.04013
C1-Cav1KO_Rab4DN_S22N_48h_9EG7-488_EEA-1_647_20.lsm-crop and C2-Cav1KO_Rab4DN_S22N_48h_9EG7-488_EEA-1_647_20.lsm-crop x 0 y0 w379 h256	0.295	1.70908		C1-Cav1WT_Rab4DN_S22N_48h_9EG7-488_EEA-1_647_20.lsm-crop and C2-Cav1WT_Rab4DN_S22N_48h_9EG7-488_EEA-1_647_20.lsm-crop x 0 y0 w605 h312	0.289	1.38729
C1-Cav1KO_Rab4DN_S22N_48h_9EG7-488_EEA-1_647_21.lsm-crop and C2-Cav1KO_Rab4DN_S22N_48h_9EG7-488_EEA-1_647_21.lsm-crop x 0 y0 w313 h122	0.205	1.18766		C1-Cav1WT_Rab4DN_S22N_48h_9EG7-488_EEA-1_647_21.lsm-crop and C2-Cav1WT_Rab4DN_S22N_48h_9EG7-488_EEA-1_647_21.lsm-crop x 0 y0 w620 h583	0.114	0.547235
C1-Cav1KO_Rab4DN_S22N_48h_9EG7-488_EEA-1_647_22.lsm-crop and C2-Cav1KO_Rab4DN_S22N_48h_9EG7-488_EEA-1_647_22.lsm-crop x 0 y0 w177 h127	0.329	1.90605		C1-Cav1WT_Rab4DN_S22N_48h_9EG7-488_EEA-1_647_22.lsm-crop and C2-Cav1WT_Rab4DN_S22N_48h_9EG7-488_EEA-1_647_22.lsm-crop x 0 y0 w836 h468	0.173	0.830453
C1-Cav1KO_Rab4DN_S22N_48h_9EG7-488_EEA-1_647_23.lsm-crop and C2-Cav1KO_Rab4DN_S22N_48h_9EG7-488_EEA-1_647_23.lsm-crop x 0 y0 w414 h422	0.364	2.10883		C1-Cav1WT_Rab4DN_S22N_48h_9EG7-488_EEA-1_647_23.lsm-crop and C2-Cav1WT_Rab4DN_S22N_48h_9EG7-488_EEA-1_647_23.lsm-crop x 0 y0 w378 h293	0.117	0.561636
C1-Cav1KO_Rab4DN_S22N_48h_9EG7-488_EEA-1_647_24.lsm-crop and C2-Cav1KO_Rab4DN_S22N_48h_9EG7-488_EEA-1_647_24.lsm-crop x 0 y0 w475 h291	0.235	1.36147		C1-Cav1WT_Rab4DN_S22N_48h_9EG7-488_EEA-1_647_24.lsm-crop and C2-Cav1WT_Rab4DN_S22N_48h_9EG7-488_EEA-1_647_24.lsm-crop x 0 y0 w604 h591	0.169	0.811252
C1-Cav1KO_Rab4DN_S22N_48h_9EG7-488_EEA-1_647_25.lsm-crop and C2-Cav1KO_Rab4DN_S22N_48h_9EG7-488_EEA-1_647_25.lsm-crop x 0 y0 w354 h374	0.362	2.09724		C1-Cav1WT_Rab4DN_S22N_48h_9EG7-488_EEA-1_647_25.lsm-crop and C2-Cav1WT_Rab4DN_S22N_48h_9EG7-488_EEA-1_647_25.lsm-crop x 0 y0 w839 h447	0.055	0.264017
C1-Cav1KO_Rab4DN_S22N_48h_9EG7-488_EEA-1_647_26.lsm-crop and C2-Cav1KO_Rab4DN_S22N_48h_9EG7-488_EEA-1_647_26.lsm-crop x 0 y0 w262 h191	0.506	2.9315		C1-Cav1WT_Rab4DN_S22N_48h_9EG7-488_EEA-1_647_3.lsm-crop and C2-Cav1WT_Rab4DN_S22N_48h_9EG7-488_EEA-1_647_3.lsm-crop x 0 y0 w219 h231	0.088	0.422427
C1-Cav1KO_Rab4DN_S22N_48h_9EG7-488_EEA-1_647_3.lsm-crop and C2-Cav1KO_Rab4DN_S22N_48h_9EG7-488_EEA-1_647_3.lsm-crop x 0 y0 w450 h135	0.427	2.47382		C1-Cav1WT_Rab4DN_S22N_48h_9EG7-488_EEA-1_647_5.lsm-crop and C2-Cav1WT_Rab4DN_S22N_48h_9EG7-488_EEA-1_647_5.lsm-crop x 0 y0 w674 h379	0.088	0.422427
C1-Cav1KO_Rab4DN_S22N_48h_9EG7-488_EEA-1_647_4.lsm-crop and C2-Cav1KO_Rab4DN_S22N_48h_9EG7-488_EEA-1_647_4.lsm-crop x 0 y0 w410 h398	0.54	3.12848		C1-Cav1WT_Rab4DN_S22N_48h_9EG7-488_EEA-1_647_6.lsm-crop and C2-Cav1WT_Rab4DN_S22N_48h_9EG7-488_EEA-1_647_6.lsm-crop x 0 y0 w560 h428	0.327	1.5697
C1-Cav1KO_Rab4DN_S22N_48h_9EG7-488_EEA-1_647_5.lsm-crop and C2-Cav1KO_Rab4DN_S22N_48h_9EG7-488_EEA-1_647_5.lsm-crop x 0 y0 w412 h248	0.443	2.56651		C1-Cav1WT_Rab4DN_S22N_48h_9EG7-488_EEA-1_647_7.lsm-crop and C2-Cav1WT_Rab4DN_S22N_48h_9EG7-488_EEA-1_647_7.lsm-crop x 0 y0 w577 h279	0.015	0.0720046
C1-Cav1KO_Rab4DN_S22N_48h_9EG7-488_EEA-1_647_6.lsm-crop and C2-Cav1KO_Rab4DN_S22N_48h_9EG7-488_EEA-1_647_6.lsm-crop x 0 y0 w408 h240	0.319	1.84812		C1-Cav1WT_Rab4DN_S22N_48h_9EG7-488_EEA-1_647_8.lsm-crop and C2-Cav1WT_Rab4DN_S22N_48h_9EG7-488_EEA-1_647_8.lsm-crop x 0 y0 w551 h572	0.109	0.523233
C1-Cav1KO_Rab4DN_S22N_48h_9EG7-488_EEA-1_647_7.lsm-crop and C2-Cav1KO_Rab4DN_S22N_48h_9EG7-488_EEA-1_647_7.lsm-crop x 0 y0 w555 h345	0.182	1.05441		C1-Cav1WT_Rab4DN_S22N_48h_9EG7-488_EEA-1_647_9.lsm-crop and C2-Cav1WT_Rab4DN_S22N_48h_9EG7-488_EEA-1_647_9.lsm-crop x 0 y0 w382 h344	0.131	0.62884
C1-Cav1KO_Rab4DN_S22N_48h_9EG7-488_EEA-1_647_8.lsm-crop and C2-Cav1KO_Rab4DN_S22N_48h_9EG7-488_EEA-1_647_8.lsm-crop x 0 y0 w285 h186	0.372	2.15517
C1-Cav1KO_Rab4DN_S22N_48h_9EG7-488_EEA-1_647_9.lsm-crop and C2-Cav1KO_Rab4DN_S22N_48h_9EG7-488_EEA-1_647_9.lsm-crop x 0 y0 w444 h265	0.455	2.63603
C1-Cav1KO_Rab4DN_S22N_48h_9EG7-488_EEA-1_647.lsm-crop and C2-Cav1KO_Rab4DN_S22N_48h_9EG7-488_EEA-1_647.lsm-crop x 0 y0 w1024 h583	0.071	0.411337
C1-Cav1KO_Rab4DN_S22N_48h_9EG7-488_EEA-1_647_10.lsm-crop and C2-Cav1KO_Rab4DN_S22N_48h_9EG7-488_EEA-1_647_10.lsm-crop x 0 y0 w863 h767	0.443	2.56651
C1-Cav1KO_Rab4DN_S22N_48h_9EG7-488_EEA-1_647_11.lsm-crop and C2-Cav1KO_Rab4DN_S22N_48h_9EG7-488_EEA-1_647_11.lsm-crop x 0 y0 w529 h344	0.244	1.41361
C1-Cav1KO_Rab4DN_S22N_48h_9EG7-488_EEA-1_647_12.lsm-crop and C2-Cav1KO_Rab4DN_S22N_48h_9EG7-488_EEA-1_647_12.lsm-crop x 0 y0 w803 h580	0.252	1.45996
C1-Cav1KO_Rab4DN_S22N_48h_9EG7-488_EEA-1_647_13.lsm-crop and C2-Cav1KO_Rab4DN_S22N_48h_9EG7-488_EEA-1_647_13.lsm-crop x 0 y0 w452 h277	0.42	2.43326
C1-Cav1KO_Rab4DN_S22N_48h_9EG7-488_EEA-1_647_14.lsm-crop and C2-Cav1KO_Rab4DN_S22N_48h_9EG7-488_EEA-1_647_14.lsm-crop x 0 y0 w341 h304	0.323	1.87129
C1-Cav1KO_Rab4DN_S22N_48h_9EG7-488_EEA-1_647_15.lsm-crop and C2-Cav1KO_Rab4DN_S22N_48h_9EG7-488_EEA-1_647_15.lsm-crop x 0 y0 w698 h631	0.245	1.4194
C1-Cav1KO_Rab4DN_S22N_48h_9EG7-488_EEA-1_647_16.lsm-crop and C2-Cav1KO_Rab4DN_S22N_48h_9EG7-488_EEA-1_647_16.lsm-crop x 0 y0 w744 h557	0.275	1.59321
C1-Cav1KO_Rab4DN_S22N_48h_9EG7-488_EEA-1_647_17.lsm-crop and C2-Cav1KO_Rab4DN_S22N_48h_9EG7-488_EEA-1_647_17.lsm-crop x 0 y0 w613 h615	0.059	0.341815
C1-Cav1KO_Rab4DN_S22N_48h_9EG7-488_EEA-1_647_18.lsm-crop and C2-Cav1KO_Rab4DN_S22N_48h_9EG7-488_EEA-1_647_18.lsm-crop x 0 y0 w663 h710	0.155	0.897989
C1-Cav1KO_Rab4DN_S22N_48h_9EG7-488_EEA-1_647_19.lsm-crop and C2-Cav1KO_Rab4DN_S22N_48h_9EG7-488_EEA-1_647_19.lsm-crop x 0 y0 w678 h529	0.179	1.03703
C1-Cav1KO_Rab4DN_S22N_48h_9EG7-488_EEA-1_647_2.lsm-crop and C2-Cav1KO_Rab4DN_S22N_48h_9EG7-488_EEA-1_647_2.lsm-crop x 0 y0 w787 h272	0.093	0.538794
C1-Cav1KO_Rab4DN_S22N_48h_9EG7-488_EEA-1_647_20.lsm-crop and C2-Cav1KO_Rab4DN_S22N_48h_9EG7-488_EEA-1_647_20.lsm-crop x 0 y0 w817 h748	0.298	1.72646
C1-Cav1KO_Rab4DN_S22N_48h_9EG7-488_EEA-1_647_21.lsm-crop and C2-Cav1KO_Rab4DN_S22N_48h_9EG7-488_EEA-1_647_21.lsm-crop x 0 y0 w447 h281	0.12	0.695218
C1-Cav1KO_Rab4DN_S22N_48h_9EG7-488_EEA-1_647_22.lsm-crop and C2-Cav1KO_Rab4DN_S22N_48h_9EG7-488_EEA-1_647_22.lsm-crop x 0 y0 w590 h515	0.154	0.892196
C1-Cav1KO_Rab4DN_S22N_48h_9EG7-488_EEA-1_647_23.lsm-crop and C2-Cav1KO_Rab4DN_S22N_48h_9EG7-488_EEA-1_647_23.lsm-crop x 0 y0 w687 h525	0.317	1.83653
C1-Cav1KO_Rab4DN_S22N_48h_9EG7-488_EEA-1_647_24.lsm-crop and C2-Cav1KO_Rab4DN_S22N_48h_9EG7-488_EEA-1_647_24.lsm-crop x 0 y0 w522 h504	0.398	2.3058
C1-Cav1KO_Rab4DN_S22N_48h_9EG7-488_EEA-1_647_25.lsm-crop and C2-Cav1KO_Rab4DN_S22N_48h_9EG7-488_EEA-1_647_25.lsm-crop x 0 y0 w592 h464	0.165	0.955924
C1-Cav1KO_Rab4DN_S22N_48h_9EG7-488_EEA-1_647_3.lsm-crop and C2-Cav1KO_Rab4DN_S22N_48h_9EG7-488_EEA-1_647_3.lsm-crop x 0 y0 w1024 h977	0.134	0.776326
C1-Cav1KO_Rab4DN_S22N_48h_9EG7-488_EEA-1_647_4.lsm-crop and C2-Cav1KO_Rab4DN_S22N_48h_9EG7-488_EEA-1_647_4.lsm-crop x 0 y0 w701 h673	0.203	1.17608
C1-Cav1KO_Rab4DN_S22N_48h_9EG7-488_EEA-1_647_5.lsm-crop and C2-Cav1KO_Rab4DN_S22N_48h_9EG7-488_EEA-1_647_5.lsm-crop x 0 y0 w977 h899	0.302	1.74963
C1-Cav1KO_Rab4DN_S22N_48h_9EG7-488_EEA-1_647_6.lsm-crop and C2-Cav1KO_Rab4DN_S22N_48h_9EG7-488_EEA-1_647_6.lsm-crop x 0 y0 w1024 h1024	0.191	1.10655
C1-Cav1KO_Rab4DN_S22N_48h_9EG7-488_EEA-1_647_7.lsm-crop and C2-Cav1KO_Rab4DN_S22N_48h_9EG7-488_EEA-1_647_7.lsm-crop x 0 y0 w807 h753	0.248	1.43678
C1-Cav1KO_Rab4DN_S22N_48h_9EG7-488_EEA-1_647_8.lsm-crop and C2-Cav1KO_Rab4DN_S22N_48h_9EG7-488_EEA-1_647_8.lsm-crop x 0 y0 w980 h578	0.134	0.776326
C1-Cav1KO_Rab4DN_S22N_48h_9EG7-488_EEA-1_647_9.lsm-crop and C2-Cav1KO_Rab4DN_S22N_48h_9EG7-488_EEA-1_647_9.lsm-crop x 0 y0 w752 h570	0.014	0.0811087
Average	0.279039	1.61661		Average	0.197333	0.947261
SEM	0.016717	0.0968496		SEM	0.0281977	0.135357
		Cav1WT
		Cav1KO

## Sheet: Recycl after Hypoos Fig 6S & 6W
	Cav1WT	Label	Area	Mean	Perimeter	MinThr	MaxThr	Normalized to Mean fluorescence Intensity Control		Cav1KO	Label	Area	Mean	Perimeter	MinThr	MaxThr	Normalized to Mean fluorescence Intensity Control
Control	1	Channel_C2-ENDOCYTOSIS CD44 & actBeta1 488 Control 2022 BEST.lif - Cav1WT 3min Endo CONTROL 2_serie_2_MAX-projection.tif:0526-0553	644.231	22.524	206.318	0	255	0.904892	Control	1	Channel_C2-ENDOCYTOSIS CD44 & actBeta1 488 Control 2022 BEST.lif - Cav1KO 3min Endo CONTROL 2_serie_16_MAX-projection.tif:0524-0720	711.929	19.936	272.947	0	255	0.625426
	2	Channel_C2-ENDOCYTOSIS CD44 & actBeta1 488 Control 2022 BEST.lif - Cav1WT 3min Endo CONTROL 4_serie_4_MAX-projection.tif:0530-0488	997.47	25.151	323.399	0	255	1.01043		2	Channel_C2-ENDOCYTOSIS CD44 & actBeta1 488 Control 2022 BEST.lif - Cav1KO 3min Endo CONTROL 2_serie_16_MAX-projection.tif:0766-0258	629.959	18.178	107.842	0	255	0.570275
	3	Channel_C2-ENDOCYTOSIS CD44 & actBeta1 488 Control 2022 BEST.lif - Cav1WT 3min Endo CONTROL 5_serie_5_MAX-projection.tif:0503-0613	585.817	29.889	100.181	0	255	1.20078		3	Channel_C2-ENDOCYTOSIS CD44 & actBeta1 488 Control 2022 BEST.lif - Cav1KO 3min Endo CONTROL 3_serie_17_MAX-projection.tif:0472-0488	1476.7	17.302	213.313	0	255	0.542793
	4	Channel_C2-ENDOCYTOSIS CD44 & actBeta1 488 Control 2022 BEST.lif - Cav1WT 3min Endo CONTROL 6_serie_6_MAX-projection.tif:0583-0521	618.863	30.743	245.044	0	255	1.23509		4	Channel_C2-ENDOCYTOSIS CD44 & actBeta1 488 Control 2022 BEST.lif - Cav1KO 3min Endo CONTROL 4_serie_18_MAX-projection.tif	478.164	36.985	183.76	0	255	1.16028
	5	Channel_C2-ENDOCYTOSIS CD44 & actBeta1 488 Control 2022 BEST.lif - Cav1WT 3min Endo CONTROL 7_serie_7_MAX-projection.tif:0482-0511	1179.73	27.693	303.963	0	255	1.11255		5	Channel_C2-ENDOCYTOSIS CD44 & actBeta1 488 Control 2022 BEST.lif - Cav1KO 3min Endo CONTROL 4_serie_18_MAX-projection.tif:0665-0235	586.411	31.505	164.256	0	255	0.988365
	6	Channel_C2-ENDOCYTOSIS CD44 & actBeta1 488 Control 2022 BEST.lif - Cav1WT 3min Endo CONTROL 8_serie_8_MAX-projection.tif:0499-0440	922.77	20.624	187.032	0	255	0.828561		6	Channel_C2-ENDOCYTOSIS CD44 & actBeta1 488 Control 2022 BEST.lif - Cav1KO 3min Endo CONTROL 5_serie_19_MAX-projection.tif:0496-0668	662.049	36.161	160.827	0	255	1.13443
	7	Channel_C2-ENDOCYTOSIS CD44 & actBeta1 488 Control 2022 BEST.lif - Cav1WT 3min Endo CONTROL 9_serie_9_MAX-projection.tif:0524-0486	929.316	21.961	234.247	0	255	0.882274		7	Channel_C2-ENDOCYTOSIS CD44 & actBeta1 488 Control 2022 BEST.lif - Cav1KO 3min Endo CONTROL 6_serie_20_MAX-projection.tif:0511-0593	961.007	31.695	175.24	0	255	0.994326
	8	Channel_C2-ENDOCYTOSIS CD44 & actBeta1 488 Control 2022 BEST.lif - Cav1WT 3min Endo CONTROL 10_serie_10_MAX-projection.tif:0586-0552	850.122	20.634	212.571	0	255	0.828962		8	Channel_C2-ENDOCYTOSIS CD44 & actBeta1 488 Control 2022 BEST.lif - Cav1KO 3min Endo CONTROL 7_serie_21_MAX-projection.tif:0568-0477	1056.3	23.704	273.262	0	255	0.743635
	9	Channel_C2-ENDOCYTOSIS CD44 & actBeta1 488 Control 2022 BEST.lif - Cav1WT 3min Endo CONTROL 11_serie_11_MAX-projection.tif:0552-0653	858.934	25.127	221.241	0	255	1.00947		9	Channel_C2-ENDOCYTOSIS CD44 & actBeta1 488 Control 2022 BEST.lif - Cav1KO 3min Endo CONTROL 8_serie_22_MAX-projection.tif:0458-0526	807.809	27.674	159.326	0	255	0.86818
	10	Channel_C2-ENDOCYTOSIS CD44 & actBeta1 488 Control 2022 BEST.lif - Cav1WT 3min Endo CONTROL 12_serie_12_MAX-projection.tif:0583-0508	449.491	29.278	212.376	0	255	1.17623		10	Channel_C2-ENDOCYTOSIS CD44 & actBeta1 488 Control 2022 BEST.lif - Cav1KO 3min Endo CONTROL 9_serie_23_MAX-projection.tif:0450-0512	1001.87	28.874	220.961	0	255	0.905826
	11	Channel_C2-ENDOCYTOSIS CD44 & actBeta1 488 Control 2022 BEST.lif - Cav1WT 3min Endo CONTROL 13_serie_13_MAX-projection.tif:0502-0480	392.609	24.453	228.374	0	255	0.982389		11	Channel_C2-ENDOCYTOSIS CD44 & actBeta1 488 Control 2022 BEST.lif - Cav1KO 3min Endo CONTROL 10_serie_24_MAX-projection.tif:0446-0338	524.395	37.221	131.849	0	255	1.16769
	12	Channel_C2-ENDOCYTOSIS CD44 & actBeta1 488 Control 2022 BEST.lif - Cav1WT 3min Endo CONTROL 14_serie_14_MAX-projection.tif:0749-0508	314.501	28.426	113.491	0	255	1.142		12	Channel_C2-ENDOCYTOSIS CD44 & actBeta1 488 Control 2022 BEST.lif - Cav1KO 3min Endo CONTROL 10_serie_24_MAX-projection.tif:0476-0700	351.271	31.359	106.43	0	255	0.983785
	13	Channel_C2-ENDOCYTOSIS CD44 & actBeta1 488 Control 2022 BEST.lif - Cav1WT 3min Endo CONTROL 15_serie_30_MAX-projection.tif:0551-0563	1304.31	21.515	290.819	0	255	0.864356		13	Channel_C2-ENDOCYTOSIS CD44 & actBeta1 488 Control 2022 BEST.lif - Cav1KO 3min Endo CONTROL 12_serie_26_MAX-projection.tif:0513-0514	1180.52	31.484	260.498	0	255	0.987706
	14	Channel_C2-ENDOCYTOSIS CD44 & actBeta1 488 Control 2022 BEST.lif - Cav1WT 3min Endo CONTROL_serie_1_MAX-projection.tif:0508-0424	800.288	20.461	222.671	0	255	0.822012		14	Channel_C2-ENDOCYTOSIS CD44 & actBeta1 488 Control 2022 BEST.lif - Cav1KO 3min Endo CONTROL 13_serie_27_MAX-projection.tif:0548-0542	1504.29	59.683	262.67	0	255	1.87236
										15	Channel_C2-ENDOCYTOSIS CD44 & actBeta1 488 Control 2022 BEST.lif - Cav1KO 3min Endo CONTROL 14_serie_28_MAX-projection.tif:0325-0522	1035.36	46.377	211.673	0	255	1.45493
			Average	24.8914				1				Average	31.8759				1
			SEM	0.996349				0.0400279				SEM	2.8395				0.08908
	1	Channel_C2-ENDOCYTOSIS CD44 & actBeta1 488 Control 2022 SECOND.lif - Cav1WT 3min Endo CONTROL 3_serie_3_MAX-projection.tif:0499-0457	1433.8	21.738	226.541	0	255	1.1685		1	Channel_C2-ENDOCYTOSIS CD44 & actBeta1 488 Control 2022 BEST.lif - Cav1KO 3min Endo CONTROL 15_serie_29_MAX-projection.tif:0517-0468	1264.27	52.726	214.223	0	255	1.80193
	2	Channel_C2-ENDOCYTOSIS CD44 & actBeta1 488 Control 2022 SECOND.lif - Cav1WT 3min Endo CONTROL 4_serie_4_MAX-projection.tif:0593-0518	660.3	15.307	131.159	0	255	0.822812		2	Channel_C2-ENDOCYTOSIS CD44 & actBeta1 488 Control 2022 BEST.lif - Cav1KO 3min Endo CONTROL_serie_15_MAX-projection.tif:0480-0497	1345.22	15.892	211.506	0	255	0.543115
	3	Channel_C2-ENDOCYTOSIS CD44 & actBeta1 488 Control 2022 SECOND.lif - Cav1WT 3min Endo CONTROL 5_serie_5_MAX-projection.tif:0546-0353	1111.23	14.943	230.32	0	255	0.803246		3	Channel_C2-ENDOCYTOSIS CD44 & actBeta1 488 Control 2022 SECOND.lif - Cav1KO 3min Endo CONTROL 2_serie_14_MAX-projection.tif:0464-0482	729.092	25.325	208.616	0	255	0.865491
	4	Channel_C2-ENDOCYTOSIS CD44 & actBeta1 488 Control 2022 SECOND.lif - Cav1WT 3min Endo CONTROL 6_serie_6_MAX-projection.tif:0402-0522	1847.05	21.694	259.518	0	255	1.16614		4	Channel_C2-ENDOCYTOSIS CD44 & actBeta1 488 Control 2022 SECOND.lif - Cav1KO 3min Endo CONTROL 3_serie_15_MAX-projection.tif:0480-0537	3501.18	29.667	372.566	0	255	1.01388
	5	Channel_C2-ENDOCYTOSIS CD44 & actBeta1 488 Control 2022 SECOND.lif - Cav1WT 3min Endo CONTROL 7_serie_7_MAX-projection.tif:0508-0550	2413.63	16.172	308.593	0	255	0.869309		5	Channel_C2-ENDOCYTOSIS CD44 & actBeta1 488 Control 2022 SECOND.lif - Cav1KO 3min Endo CONTROL 4_serie_16_MAX-projection.tif:0521-0463	3511.42	19.358	369.835	0	255	0.661567
	6	Channel_C2-ENDOCYTOSIS CD44 & actBeta1 488 Control 2022 SECOND.lif - Cav1WT 3min Endo CONTROL 8_serie_8_MAX-projection.tif:0588-0509	2145.14	14.618	270.016	0	255	0.785776		6	Channel_C2-ENDOCYTOSIS CD44 & actBeta1 488 Control 2022 SECOND.lif - Cav1KO 3min Endo CONTROL 5_serie_17_MAX-projection.tif:0408-0349	420.501	24.856	116.605	0	255	0.849463
	7	Channel_C2-ENDOCYTOSIS CD44 & actBeta1 488 Control 2022 SECOND.lif - Cav1WT 3min Endo CONTROL 9_serie_9_MAX-projection.tif:0480-0579	2071.66	19.733	280.966	0	255	1.06073		7	Channel_C2-ENDOCYTOSIS CD44 & actBeta1 488 Control 2022 SECOND.lif - Cav1KO 3min Endo CONTROL 5_serie_17_MAX-projection.tif:0453-0733	457.734	27.378	126.068	0	255	0.935653
	8	Channel_C2-ENDOCYTOSIS CD44 & actBeta1 488 Control 2022 SECOND.lif - Cav1WT 3min Endo CONTROL 10_serie_10_MAX-projection.tif:0755-0344	685.291	18.266	143.624	0	255	0.98187		8	Channel_C2-ENDOCYTOSIS CD44 & actBeta1 488 Control 2022 SECOND.lif - Cav1KO 3min Endo CONTROL 6_serie_18_MAX-projection.tif:0513-0469	1357.66	62.354	372.02	0	255	2.13097
	9	Channel_C2-ENDOCYTOSIS CD44 & actBeta1 488 Control 2022 SECOND.lif - Cav1WT 3min Endo CONTROL 10_serie_10_MAX-projection.tif:0394-0808	906.714	18.292	178.454	0	255	0.983268		9	Channel_C2-ENDOCYTOSIS CD44 & actBeta1 488 Control 2022 SECOND.lif - Cav1KO 3min Endo CONTROL 7_serie_19_MAX-projection.tif:0661-0657	585.226	22.316	143.242	0	255	0.762658
	10	Channel_C2-ENDOCYTOSIS CD44 & actBeta1 488 Control 2022 SECOND.lif - Cav1WT 3min Endo CONTROL 11_serie_11_MAX-projection.tif:0562-0595	892.258	19.181	236.292	0	255	1.03106		10	Channel_C2-ENDOCYTOSIS CD44 & actBeta1 488 Control 2022 SECOND.lif - Cav1KO 3min Endo CONTROL 8_serie_20_MAX-projection.tif:0505-0457	829.776	27.731	223.892	0	255	0.947717
	11	Channel_C2-ENDOCYTOSIS CD44 & actBeta1 488 Control 2022 SECOND.lif - Cav1WT 3min Endo CONTROL 12_serie_12_MAX-projection.tif:0418-0592	611.73	24.692	132.067	0	255	1.32729		11	Channel_C2-ENDOCYTOSIS CD44 & actBeta1 488 Control 2022 SECOND.lif - Cav1KO 3min Endo CONTROL 9_serie_21_MAX-projection.tif:0354-0438	1075	21.89	163.458	0	255	0.748099
										12	Channel_C2-ENDOCYTOSIS CD44 & actBeta1 488 Control 2022 SECOND.lif - Cav1KO 3min Endo CONTROL 10_serie_22_MAX-projection.tif:0621-0398	957.609	21.637	165.567	0	255	0.739453
			Average	18.6033				1
			SEM	0.973881				0.05235				Average	29.2608				1
												SEM	4.01153				0.137095
	1	Channel_C2-ENDOCYTOSIS CD44 & actBeta1 488 Control 2022 SECOND.lif - Cav1WT 3min Endo CONTROL_serie_1_MAX-projection.tif:0476-0541	1120.64	38.643	219.567	0	255	1.70023		1	Channel_C2-ENDOCYTOSIS CD44 & actBeta1 488 Control 2022 SECOND.lif - Cav1KO 3min Endo CONTROL 10_serie_22_MAX-projection.tif:0555-0776	723.733	25.541	203.82	0	255	0.949968
	2	Channel_C2-ENDOCYTOSIS CD44 & actBeta1 488 Control 2022 THIRD.lif - Cav1WT 3min Endo CONTROL 2_serie_2_MAX-projection.tif:0537-0405	702.77	19.35	256.693	0	255	0.851368		2	Channel_C2-ENDOCYTOSIS CD44 & actBeta1 488 Control 2022 SECOND.lif - Cav1KO 3min Endo CONTROL 12_serie_24_MAX-projection.tif:0482-0594	465.437	32.006	102.738	0	255	1.19043
	3	Channel_C2-ENDOCYTOSIS CD44 & actBeta1 488 Control 2022 THIRD.lif - Cav1WT 3min Endo CONTROL 3_serie_3_MAX-projection.tif:0421-0441	696.044	14.94	177.999	0	255	0.657336		3	Channel_C2-ENDOCYTOSIS CD44 & actBeta1 488 Control 2022 SECOND.lif - Cav1KO 3min Endo CONTROL_serie_13_MAX-projection.tif:0746-0405	716.066	23.94	199.792	0	255	0.890421
	4	Channel_C2-ENDOCYTOSIS CD44 & actBeta1 488 Control 2022 THIRD.lif - Cav1WT 3min Endo CONTROL 4_serie_4_MAX-projection.tif:0522-0430	666.616	66.642	207.498	0	255	2.93214		4	Channel_C2-ENDOCYTOSIS CD44 & actBeta1 488 Control 2022 SECOND.lif - Cav1KO 3min Endo CONTROL_serie_13_MAX-projection.tif:0391-0790	488.814	23.726	117.855	0	255	0.882462
	5	Channel_C2-ENDOCYTOSIS CD44 & actBeta1 488 Control 2022 THIRD.lif - Cav1WT 3min Endo CONTROL 5_serie_5_MAX-projection.tif:0510-0522	6680.78	28.656	407.863	0	255	1.26082		5	Channel_C2-ENDOCYTOSIS CD44 & actBeta1 488 Control 2022 THIRD.lif - Cav1KO 3min Endo CONTROL 3_serie_15_MAX-projection.tif:0491-0275	903.803	14.111	172.29	0	255	0.524843
	6	Channel_C2-ENDOCYTOSIS CD44 & actBeta1 488 Control 2022 THIRD.lif - Cav1WT 3min Endo CONTROL 6_serie_6_MAX-projection.tif:0517-0343	917.964	18.848	183.957	0	255	0.829281		6	Channel_C2-ENDOCYTOSIS CD44 & actBeta1 488 Control 2022 THIRD.lif - Cav1KO 3min Endo CONTROL 3_serie_15_MAX-projection.tif:0550-0714	779.273	17.092	147.481	0	255	0.635717
	7	Channel_C2-ENDOCYTOSIS CD44 & actBeta1 488 Control 2022 THIRD.lif - Cav1WT 3min Endo CONTROL 6_serie_6_MAX-projection.tif:0762-0174	561.339	20.489	129.179	0	255	0.901482		7	Channel_C2-ENDOCYTOSIS CD44 & actBeta1 488 Control 2022 THIRD.lif - Cav1KO 3min Endo CONTROL 5_serie_17_MAX-projection.tif:0505-0583	1245.08	17.231	192.252	0	255	0.640887
	8	Channel_C2-ENDOCYTOSIS CD44 & actBeta1 488 Control 2022 THIRD.lif - Cav1WT 3min Endo CONTROL 6_serie_6_MAX-projection.tif:0688-0736	687.484	15.029	146.679	0	255	0.661251		8	Channel_C2-ENDOCYTOSIS CD44 & actBeta1 488 Control 2022 THIRD.lif - Cav1KO 3min Endo CONTROL 6_serie_18_MAX-projection.tif:0455-0508	644.135	25.533	197.155	0	255	0.949671
	9	Channel_C2-ENDOCYTOSIS CD44 & actBeta1 488 Control 2022 THIRD.lif - Cav1WT 3min Endo CONTROL 7_serie_7_MAX-projection.tif:0658-0825	398.811	19.415	127.984	0	255	0.854228		9	Channel_C2-ENDOCYTOSIS CD44 & actBeta1 488 Control 2022 THIRD.lif - Cav1KO 3min Endo CONTROL 7_serie_19_MAX-projection.tif:0411-0297	220.637	28.403	60.361	0	255	1.05642
	10	Channel_C2-ENDOCYTOSIS CD44 & actBeta1 488 Control 2022 THIRD.lif - Cav1WT 3min Endo CONTROL 8_serie_8_MAX-projection.tif:0534-0737	1052.58	17.066	213.483	0	255	0.750876		10	Channel_C2-ENDOCYTOSIS CD44 & actBeta1 488 Control 2022 THIRD.lif - Cav1KO 3min Endo CONTROL 7_serie_19_MAX-projection.tif:0568-0658	246.292	36.796	83.524	0	255	1.36859
	11	Channel_C2-ENDOCYTOSIS CD44 & actBeta1 488 Control 2022 THIRD.lif - Cav1WT 3min Endo CONTROL 9_serie_9_MAX-projection.tif:0606-0217	889.431	13.915	187.736	0	255	0.612237		11	Channel_C2-ENDOCYTOSIS CD44 & actBeta1 488 Control 2022 THIRD.lif - Cav1KO 3min Endo CONTROL 8_serie_20_MAX-projection.tif:0463-0538	1161.77	21.628	167.276	0	255	0.804429
	12	Channel_C2-ENDOCYTOSIS CD44 & actBeta1 488 Control 2022 THIRD.lif - Cav1WT 3min Endo CONTROL 10_serie_10_MAX-projection.tif:0251-0368	648.129	16.626	185.088	0	255	0.731517		12	Channel_C2-ENDOCYTOSIS CD44 & actBeta1 488 Control 2022 THIRD.lif - Cav1KO 3min Endo CONTROL 9_serie_21_MAX-projection.tif:0425-0324	427.861	20.438	104.266	0	255	0.760168
	13	Channel_C2-ENDOCYTOSIS CD44 & actBeta1 488 Control 2022 THIRD.lif - Cav1WT 3min Endo CONTROL 10_serie_10_MAX-projection.tif:0730-0561	880.482	17.627	189.066	0	255	0.775559		13	Channel_C2-ENDOCYTOSIS CD44 & actBeta1 488 Control 2022 THIRD.lif - Cav1KO 3min Endo CONTROL 9_serie_21_MAX-projection.tif:0523-0578	541.45	28.295	136.484	0	255	1.0524
	14	Channel_C2-ENDOCYTOSIS CD44 & actBeta1 488 Control 2022 THIRD.lif - Cav1WT 3min Endo CONTROL 11_serie_11_MAX-projection.tif:0422-0215	381.145	22.746	162.208	0	255	1.00079		14	Channel_C2-ENDOCYTOSIS CD44 & actBeta1 488 Control 2022 THIRD.lif - Cav1KO 3min Endo CONTROL 9_serie_21_MAX-projection.tif:0734-0754	323.359	25.691	125.433	0	255	0.955547
	15	Channel_C2-ENDOCYTOSIS CD44 & actBeta1 488 Control 2022 THIRD.lif - Cav1WT 3min Endo CONTROL 11_serie_11_MAX-projection.tif:0593-0475	507.391	18.451	113.2	0	255	0.811814		15	Channel_C2-ENDOCYTOSIS CD44 & actBeta1 488 Control 2022 THIRD.lif - Cav1KO 3min Endo CONTROL 10_serie_22_MAX-projection.tif:0442-0545	890.907	19.295	206.234	0	255	0.717656
	16	Channel_C2-ENDOCYTOSIS CD44 & actBeta1 488 Control 2022 THIRD.lif - Cav1WT 3min Endo CONTROL 12_serie_12_MAX-projection.tif:0520-0476	1896.84	17.467	232.031	0	255	0.768519		16	Channel_C2-ENDOCYTOSIS CD44 & actBeta1 488 Control 2022 THIRD.lif - Cav1KO 3min Endo CONTROL 11_serie_23_MAX-projection.tif:0401-0270	677.4	77.984	176.328	0	255	2.90053
	17	Channel_C2-ENDOCYTOSIS CD44 & actBeta1 488 Control 2022 THIRD.lif - Cav1WT 3min Endo CONTROL_serie_1_MAX-projection.tif:0517-0515	1879.99	20.468	273.067	0	255	0.900559		17	Channel_C2-ENDOCYTOSIS CD44 & actBeta1 488 Control 2022 THIRD.lif - Cav1KO 3min Endo CONTROL 12_serie_24_MAX-projection.tif:0332-0356	467.142	31.458	144.291	0	255	1.17004
										18	Channel_C2-ENDOCYTOSIS CD44 & actBeta1 488 Control 2022 THIRD.lif - Cav1KO 3min Endo CONTROL 12_serie_24_MAX-projection.tif:0736-0859	631.192	22.211	124.597	0	255	0.826113
			Average	22.7281				1		19	Channel_C2-ENDOCYTOSIS CD44 & actBeta1 488 Control 2022 THIRD.lif - Cav1KO 3min Endo CONTROL_serie_13_MAX-projection.tif:0374-0277	290.139	19.458	69.627	0	255	0.723718
			SEM	3.0937				0.136118
												Average	26.8862				1
												SEM	3.12534				0.116243
			Average	22.0742				1				Average	29.341				1
			SEM	1.84442				9.06493e-17				SEM	1.44096				9.06493e-17
	Cav1WT	Label	Area	Mean	Perimeter	MinThr	MaxThr			Cav1KO	Label	Area	Mean	Perimeter	MinThr	MaxThr
Hypoosmotic 1-10 1min	1	Channel_C2-ENDOCYTOSIS CD44 & actBeta1 488 after Hypo 1-10 1min 2022.lif - Cav1WT 3min Endo Hypo 1-10 2_serie_2_MAX-projection.tif:0363-0577	1005.29	24.814	153.601	0	255	0.996892	Hypoosmotic 1-10 1min	1	Channel_C2-ENDOCYTOSIS CD44 & actBeta1 488 after Hypo 1-10 1min 2022.lif - Cav1KO 3min Endo Hypo 1-10 2_serie_7_MAX-projection.tif:0406-0538	684.033	22.2	211.074	0	255	0.696452
	2	Channel_C2-ENDOCYTOSIS CD44 & actBeta1 488 after Hypo 1-10 1min 2022.lif - Cav1WT 3min Endo Hypo 1-10 3_serie_3_MAX-projection.tif:0651-0400	649.937	18.017	193.148	0	255	0.723826		2	Channel_C2-ENDOCYTOSIS CD44 & actBeta1 488 after Hypo 1-10 1min 2022.lif - Cav1KO 3min Endo Hypo 1-10 3_serie_8_MAX-projection.tif:0538-0630	522.289	22.105	141.772	0	255	0.693471
	3	Channel_C2-ENDOCYTOSIS CD44 & actBeta1 488 after Hypo 1-10 1min 2022.lif - Cav1WT 3min Endo Hypo 1-10 4_serie_4_MAX-projection.tif:0562-0485	1108.31	18.212	262.201	0	255	0.73166		3	Channel_C2-ENDOCYTOSIS CD44 & actBeta1 488 after Hypo 1-10 1min 2022.lif - Cav1KO 3min Endo Hypo 1-10 4_serie_9_MAX-projection.tif:0411-0609	981.994	17.839	139.459	0	255	0.55964
	4	Channel_C2-ENDOCYTOSIS CD44 & actBeta1 488 after Hypo 1-10 1min 2022.lif - Cav1WT 3min Endo Hypo 1-10 5_serie_5_MAX-projection.tif:0359-0327	887.156	19.36	136.178	0	255	0.77778		4	Channel_C2-ENDOCYTOSIS CD44 & actBeta1 488 after Hypo 1-10 1min 2022.lif - Cav1KO 3min Endo Hypo 1-10 5_serie_10_MAX-projection.tif:0476-0526	1598.05	16.582	243.159	0	255	0.520205
	5	Channel_C2-ENDOCYTOSIS CD44 & actBeta1 488 after Hypo 1-10 1min 2022.lif - Cav1WT 3min Endo Hypo 1-10 5_serie_5_MAX-projection.tif:0784-0730	559.856	17.137	153.146	0	255	0.688472		5	Channel_C2-ENDOCYTOSIS CD44 & actBeta1 488 after Hypo 1-10 1min 2022.lif - Cav1KO 3min Endo Hypo 1-10 6_serie_11_MAX-projection.tif:0526-0570	601.14	20.753	138.245	0	255	0.651057
	6	Channel_C2-ENDOCYTOSIS CD44 & actBeta1 488 after Hypo 1-10 1min 2022.lif - Cav1WT 3min Endo Hypo 1-10 6_serie_21_MAX-projection.tif:0507-0362	670.323	26.669	122.129	0	255	1.07142		6	Channel_C2-ENDOCYTOSIS CD44 & actBeta1 488 after Hypo 1-10 1min 2022.lif - Cav1KO 3min Endo Hypo 1-10 7_serie_12_MAX-projection.tif:0514-0451	384.44	27.758	102.081	0	255	0.870816
	7	Channel_C2-ENDOCYTOSIS CD44 & actBeta1 488 after Hypo 1-10 1min 2022.lif - Cav1WT 3min Endo Hypo 1-10 6_serie_21_MAX-projection.tif:0369-0633	602.704	26.543	105.525	0	255	1.06635		7	Channel_C2-ENDOCYTOSIS CD44 & actBeta1 488 after Hypo 1-10 1min 2022.lif - Cav1KO 3min Endo Hypo 1-10 8_serie_13_MAX-projection.tif:0411-0581	910.632	23.737	207.482	0	255	0.74467
	8	Channel_C2-ENDOCYTOSIS CD44 & actBeta1 488 after Hypo 1-10 1min 2022.lif - Cav1WT 3min Endo Hypo 1-10 7_serie_22_MAX-projection.tif:0397-0277	1272.39	22.534	195.303	0	255	0.905294		8	Channel_C2-ENDOCYTOSIS CD44 & actBeta1 488 after Hypo 1-10 1min 2022.lif - Cav1KO 3min Endo Hypo 1-10 9_serie_14_MAX-projection.tif:0460-0476	1144.83	25.144	204.457	0	255	0.78881
	9	Channel_C2-ENDOCYTOSIS CD44 & actBeta1 488 after Hypo 1-10 1min 2022.lif - Cav1WT 3min Endo Hypo 1-10 7_serie_22_MAX-projection.tif:0672-0758	1053.98	22.345	166.676	0	255	0.897701		9	Channel_C2-ENDOCYTOSIS CD44 & actBeta1 488 after Hypo 1-10 1min 2022.lif - Cav1KO 3min Endo Hypo 1-10 10_serie_15_MAX-projection.tif:0491-0548	1732.58	20.301	216.788	0	255	0.636877
	10	Channel_C2-ENDOCYTOSIS CD44 & actBeta1 488 after Hypo 1-10 1min 2022.lif - Cav1WT 3min Endo Hypo 1-10 8_serie_23_MAX-projection.tif:0494-0500	2758.16	22.434	345.63	0	255	0.901277		10	Channel_C2-ENDOCYTOSIS CD44 & actBeta1 488 after Hypo 1-10 1min 2022.lif - Cav1KO 3min Endo Hypo 1-10 11_serie_16_MAX-projection.tif:0446-0512	746.89	26.61	217.778	0	255	0.834801
	11	Channel_C2-ENDOCYTOSIS CD44 & actBeta1 488 after Hypo 1-10 1min 2022.lif - Cav1WT 3min Endo Hypo 1-10 9_serie_24_MAX-projection.tif:0520-0494	343.051	42.333	114.974	0	255	1.70071		11	Channel_C2-ENDOCYTOSIS CD44 & actBeta1 488 after Hypo 1-10 1min 2022.lif - Cav1KO 3min Endo Hypo 1-10 13_serie_18_MAX-projection.tif:0310-0504	589.072	30.75	196.65	0	255	0.96468
	12	Channel_C2-ENDOCYTOSIS CD44 & actBeta1 488 after Hypo 1-10 1min 2022.lif - Cav1WT 3min Endo Hypo 1-10 10_serie_25_MAX-projection.tif:0426-0518	389.845	34.228	158.271	0	255	1.3751		12	Channel_C2-ENDOCYTOSIS CD44 & actBeta1 488 after Hypo 1-10 1min 2022.lif - Cav1KO 3min Endo Hypo 1-10 13_serie_18_MAX-projection.tif:0720-0422	1045.66	27.074	148.853	0	255	0.849357
	13	Channel_C2-ENDOCYTOSIS CD44 & actBeta1 488 after Hypo 1-10 1min 2022.lif - Cav1WT 3min Endo Hypo 1-10 11_serie_26_MAX-projection.tif:0469-0404	1579.7	24.05	218.1	0	255	0.966199		13	Channel_C2-ENDOCYTOSIS CD44 & actBeta1 488 after Hypo 1-10 1min 2022.lif - Cav1KO 3min Endo Hypo 1-10 14_serie_19_MAX-projection.tif:0425-0417	798.062	25.813	231.221	0	255	0.809798
	14	Channel_C2-ENDOCYTOSIS CD44 & actBeta1 488 after Hypo 1-10 1min 2022.lif - Cav1WT 3min Endo Hypo 1-10 12_serie_27_MAX-projection.tif:0490-0503	738.616	31.819	169.469	0	255	1.27832		14	Channel_C2-ENDOCYTOSIS CD44 & actBeta1 488 after Hypo 1-10 1min 2022.lif - Cav1KO 3min Endo Hypo 1-10 15_serie_20_MAX-projection.tif:0364-0646	383.783	28.847	79.378	0	255	0.904979
	15	Channel_C2-ENDOCYTOSIS CD44 & actBeta1 488 after Hypo 1-10 1min 2022.lif - Cav1WT 3min Endo Hypo 1-10 13_serie_28_MAX-projection.tif:0507-0452	2236.63	21.338	246.33	0	255	0.857245		15	Channel_C2-ENDOCYTOSIS CD44 & actBeta1 488 after Hypo 1-10 1min 2022.lif - Cav1KO 3min Endo Hypo 1-10_serie_6_MAX-projection.tif:0673-0730	674.898	20.34	149.398	0	255	0.6381
			Average	24.7889				0.995882				Average	23.7235				0.744247
			SEM	1.77163				0.0711746				SEM	1.06992				0.0335654
	1	Channel_C2-ENDOCYTOSIS CD44 & actBeta1 488 after Hypo 1-10 1min 2022.lif - Cav1WT 3min Endo Hypo 1-10 14_serie_29_MAX-projection.tif:0522-0600	1265.52	20.534	187.212	0	255	1.10378		1	Channel_C2-ENDOCYTOSIS CD44 & actBeta1 488 after Hypo 1-10 1min 2022.lif - Cav1KO 3min Endo Hypo 1-10_serie_6_MAX-projection.tif:0633-0378	634.545	19.869	205.233	0	255	0.679031
	2	Channel_C2-ENDOCYTOSIS CD44 & actBeta1 488 after Hypo 1-10 1min 2022.lif - Cav1WT 3min Endo Hypo 1-10 15_serie_30_MAX-projection.tif:0511-0560	1624.19	20.697	351.953	0	255	1.11255		2	Channel_C2-ENDOCYTOSIS CD44 & actBeta1 488 after Hypo 1-10 1min 2022 SECOND.lif - Cav1KO 3min Endo Hypo 1-10 2_serie_14_MAX-projection.tif:0506-0464	785.046	13.551	144.863	0	255	0.463111
	3	Channel_C2-ENDOCYTOSIS CD44 & actBeta1 488 after Hypo 1-10 1min 2022.lif - Cav1WT 3min Endo Hypo 1-10_serie_1_MAX-projection.tif:0416-0556	1051.65	12.147	129.749	0	255	0.65295		3	Channel_C2-ENDOCYTOSIS CD44 & actBeta1 488 after Hypo 1-10 1min 2022 SECOND.lif - Cav1KO 3min Endo Hypo 1-10 3_serie_15_MAX-projection.tif:0502-0703	676.418	20.332	138.069	0	255	0.694854
	4	Channel_C2-ENDOCYTOSIS CD44 & actBeta1 488 after Hypo 1-10 1min 2022 SECOND.lif - Cav1WT 3min Endo Hypo 1-10 2_serie_2_MAX-projection.tif:0472-0402	1263.4	20.384	156.457	0	255	1.09572		4	Channel_C2-ENDOCYTOSIS CD44 & actBeta1 488 after Hypo 1-10 1min 2022 SECOND.lif - Cav1KO 3min Endo Hypo 1-10 3_serie_15_MAX-projection.tif:0351-0186	292.137	28.344	64.67	0	255	0.968667
	5	Channel_C2-ENDOCYTOSIS CD44 & actBeta1 488 after Hypo 1-10 1min 2022 SECOND.lif - Cav1WT 3min Endo Hypo 1-10 3_serie_3_MAX-projection.tif:0554-0598	2359.92	13.876	257.192	0	255	0.74589		5	Channel_C2-ENDOCYTOSIS CD44 & actBeta1 488 after Hypo 1-10 1min 2022 SECOND.lif - Cav1KO 3min Endo Hypo 1-10 4_serie_16_MAX-projection.tif:0449-0513	658.241	18.663	117.253	0	255	0.637815
	6	Channel_C2-ENDOCYTOSIS CD44 & actBeta1 488 after Hypo 1-10 1min 2022 SECOND.lif - Cav1WT 3min Endo Hypo 1-10 4_serie_4_MAX-projection.tif:0525-0557	2067.29	17.853	306.999	0	255	0.95967		6	Channel_C2-ENDOCYTOSIS CD44 & actBeta1 488 after Hypo 1-10 1min 2022 SECOND.lif - Cav1KO 3min Endo Hypo 1-10 5_serie_17_MAX-projection.tif:0494-0492	1173.4	23.1	197.879	0	255	0.789451
	7	Channel_C2-ENDOCYTOSIS CD44 & actBeta1 488 after Hypo 1-10 1min 2022 SECOND.lif - Cav1WT 3min Endo Hypo 1-10 5_serie_5_MAX-projection.tif:0550-0500	894.149	24.153	279.484	0	255	1.29832		7	Channel_C2-ENDOCYTOSIS CD44 & actBeta1 488 after Hypo 1-10 1min 2022 SECOND.lif - Cav1KO 3min Endo Hypo 1-10 6_serie_18_MAX-projection.tif:0419-0539	478.489	33.873	86.949	0	255	1.15762
	8	Channel_C2-ENDOCYTOSIS CD44 & actBeta1 488 after Hypo 1-10 1min 2022 SECOND.lif - Cav1WT 3min Endo Hypo 1-10 6_serie_6_MAX-projection.tif:0432-0529	1300.01	25.699	280.406	0	255	1.38142		8	Channel_C2-ENDOCYTOSIS CD44 & actBeta1 488 after Hypo 1-10 1min 2022 SECOND.lif - Cav1KO 3min Endo Hypo 1-10 7_serie_19_MAX-projection.tif:0531-0650	733.124	32.88	260.241	0	255	1.12369
	9	Channel_C2-ENDOCYTOSIS CD44 & actBeta1 488 after Hypo 1-10 1min 2022 SECOND.lif - Cav1WT 3min Endo Hypo 1-10 7_serie_7_MAX-projection.tif:0452-0515	1211.28	14.995	205.49	0	255	0.806041		9	Channel_C2-ENDOCYTOSIS CD44 & actBeta1 488 after Hypo 1-10 1min 2022 SECOND.lif - Cav1KO 3min Endo Hypo 1-10 8_serie_20_MAX-projection.tif:0513-0652	1217.36	14.245	233.17	0	255	0.486828
	10	Channel_C2-ENDOCYTOSIS CD44 & actBeta1 488 after Hypo 1-10 1min 2022 SECOND.lif - Cav1WT 3min Endo Hypo 1-10 8_serie_8_MAX-projection.tif:0424-0516	3155.49	20.876	376.748	0	255	1.12217		10	Channel_C2-ENDOCYTOSIS CD44 & actBeta1 488 after Hypo 1-10 1min 2022 SECOND.lif - Cav1KO 3min Endo Hypo 1-10 9_serie_21_MAX-projection.tif:0584-0550	697.409	19.824	157.723	0	255	0.677493
	11	Channel_C2-ENDOCYTOSIS CD44 & actBeta1 488 after Hypo 1-10 1min 2022 SECOND.lif - Cav1WT 3min Endo Hypo 1-10 9_serie_9_MAX-projection.tif:0532-0707	1204.72	17.482	252.264	0	255	0.939727		11	Channel_C2-ENDOCYTOSIS CD44 & actBeta1 488 after Hypo 1-10 1min 2022 SECOND.lif - Cav1KO 3min Endo Hypo 1-10 10_serie_22_MAX-projection.tif:0562-0613	498.739	19.165	209.179	0	255	0.654971
	12	Channel_C2-ENDOCYTOSIS CD44 & actBeta1 488 after Hypo 1-10 1min 2022 SECOND.lif - Cav1WT 3min Endo Hypo 1-10 10_serie_10_MAX-projection.tif:0525-0456	1549.77	13.205	209.999	0	255	0.709821		12	Channel_C2-ENDOCYTOSIS CD44 & actBeta1 488 after Hypo 1-10 1min 2022 SECOND.lif - Cav1KO 3min Endo Hypo 1-10 11_serie_23_MAX-projection.tif:0342-0662	409.733	19.175	117.861	0	255	0.655313
			Average	18.4918				0.994005				Average	21.9184				0.74907
			SEM	1.2476				0.0670635				SEM	1.88988				0.0645873
	1	Channel_C2-ENDOCYTOSIS CD44 & actBeta1 488 after Hypo 1-10 1min 2022 SECOND.lif - Cav1WT 3min Endo Hypo 1-10 11_serie_11_MAX-projection.tif:0532-0474	1543.5	18.671	195.733	0	255	0.821493		1	Channel_C2-ENDOCYTOSIS CD44 & actBeta1 488 after Hypo 1-10 1min 2022 SECOND.lif - Cav1KO 3min Endo Hypo 1-10 11_serie_23_MAX-projection.tif:0573-0254	843.769	14.918	159.77	0	255	0.554858
	2	Channel_C2-ENDOCYTOSIS CD44 & actBeta1 488 after Hypo 1-10 1min 2022 SECOND.lif - Cav1WT 3min Endo Hypo 1-10 12_serie_12_MAX-projection.tif:0509-0589	1487.97	22.04	321.486	0	255	0.969724		2	Channel_C2-ENDOCYTOSIS CD44 & actBeta1 488 after Hypo 1-10 1min 2022 SECOND.lif - Cav1KO 3min Endo Hypo 1-10 12_serie_24_MAX-projection.tif:0421-0513	1266.59	19.886	230.426	0	255	0.739637
	3	Channel_C2-ENDOCYTOSIS CD44 & actBeta1 488 after Hypo 1-10 1min 2022 SECOND.lif - Cav1WT 3min Endo Hypo 1-10_serie_1_MAX-projection.tif:0475-0524	833.154	23.559	167.44	0	255	1.03656		3	Channel_C2-ENDOCYTOSIS CD44 & actBeta1 488 after Hypo 1-10 1min 2022 SECOND.lif - Cav1KO 3min Endo Hypo 1-10_serie_13_MAX-projection.tif:0492-0482	712.735	14.429	178.921	0	255	0.53667
	4	Channel_C2-ENDOCYTOSIS CD44 & actBeta1 488 after Hypo 1-10 1min 2022 THIRD.lif - Cav1WT 3min Endo HYPO 1-10 2_serie_2_MAX-projection.tif:0774-0572	335.721	20.245	100.537	0	255	0.890747		4	Channel_C2-ENDOCYTOSIS CD44 & actBeta1 488 after Hypo 1-10 1min 2022 THIRD.lif - Cav1KO 3min Endo HYPO 1-10 2_serie_15_MAX-projection.tif:0548-0534	1157.41	16.954	221.862	0	255	0.630585
	5	Channel_C2-ENDOCYTOSIS CD44 & actBeta1 488 after Hypo 1-10 1min 2022 THIRD.lif - Cav1WT 3min Endo HYPO 1-10 2_serie_2_MAX-projection.tif:0231-0480	342.787	21.02	107.052	0	255	0.924846		5	Channel_C2-ENDOCYTOSIS CD44 & actBeta1 488 after Hypo 1-10 1min 2022 THIRD.lif - Cav1KO 3min Endo HYPO 1-10 3_serie_16_MAX-projection.tif:0216-0434	297.983	25.891	85.793	0	255	0.962986
	6	Channel_C2-ENDOCYTOSIS CD44 & actBeta1 488 after Hypo 1-10 1min 2022 THIRD.lif - Cav1WT 3min Endo HYPO 1-10 3_serie_3_MAX-projection.tif:0714-0887	395.462	23.153	137.775	0	255	1.01869		6	Channel_C2-ENDOCYTOSIS CD44 & actBeta1 488 after Hypo 1-10 1min 2022 THIRD.lif - Cav1KO 3min Endo HYPO 1-10 3_serie_16_MAX-projection.tif:0708-0561	358.606	24.292	76.009	0	255	0.903513
	7	Channel_C2-ENDOCYTOSIS CD44 & actBeta1 488 after Hypo 1-10 1min 2022 THIRD.lif - Cav1WT 3min Endo HYPO 1-10 3_serie_3_MAX-projection.tif:0626-0283	733.01	14.631	153.765	0	255	0.64374		7	Channel_C2-ENDOCYTOSIS CD44 & actBeta1 488 after Hypo 1-10 1min 2022 THIRD.lif - Cav1KO 3min Endo HYPO 1-10 4_serie_17_MAX-projection.tif:0683-0728	1167.2	16.933	181.039	0	255	0.629804
	8	Channel_C2-ENDOCYTOSIS CD44 & actBeta1 488 after Hypo 1-10 1min 2022 THIRD.lif - Cav1WT 3min Endo HYPO 1-10 4_serie_4_MAX-projection.tif:0387-0609	283.562	19.465	80.678	0	255	0.856428		8	Channel_C2-ENDOCYTOSIS CD44 & actBeta1 488 after Hypo 1-10 1min 2022 THIRD.lif - Cav1KO 3min Endo HYPO 1-10 4_serie_17_MAX-projection.tif:0388-0226	1229.84	16.709	179.45	0	255	0.621472
	9	Channel_C2-ENDOCYTOSIS CD44 & actBeta1 488 after Hypo 1-10 1min 2022 THIRD.lif - Cav1WT 3min Endo HYPO 1-10 4_serie_4_MAX-projection.tif:0781-0228	637.714	16.066	127.369	0	255	0.706878		9	Channel_C2-ENDOCYTOSIS CD44 & actBeta1 488 after Hypo 1-10 1min 2022 THIRD.lif - Cav1KO 3min Endo HYPO 1-10 5_serie_18_MAX-projection.tif:0458-0498	477.216	24.162	113.922	0	255	0.898678
	10	Channel_C2-ENDOCYTOSIS CD44 & actBeta1 488 after Hypo 1-10 1min 2022 THIRD.lif - Cav1WT 3min Endo HYPO 1-10 5_serie_5_MAX-projection.tif:0493-0285	248.386	21.397	72.28	0	255	0.941433		10	Channel_C2-ENDOCYTOSIS CD44 & actBeta1 488 after Hypo 1-10 1min 2022 THIRD.lif - Cav1KO 3min Endo HYPO 1-10 6_serie_19_MAX-projection.tif:0320-0224	1073.94	16.13	137.369	0	255	0.599937
	11	Channel_C2-ENDOCYTOSIS CD44 & actBeta1 488 after Hypo 1-10 1min 2022 THIRD.lif - Cav1WT 3min Endo HYPO 1-10 5_serie_5_MAX-projection.tif:0400-0744	401.652	19.661	94.402	0	255	0.865052		11	Channel_C2-ENDOCYTOSIS CD44 & actBeta1 488 after Hypo 1-10 1min 2022 THIRD.lif - Cav1KO 3min Endo HYPO 1-10 6_serie_19_MAX-projection.tif:0646-0536	1278.28	16.692	242.242	0	255	0.62084
	12	Channel_C2-ENDOCYTOSIS CD44 & actBeta1 488 after Hypo 1-10 1min 2022 THIRD.lif - Cav1WT 3min Endo HYPO 1-10 6_serie_6_MAX-projection.tif:0478-0216	635.177	18.041	153.598	0	255	0.793774		12	Channel_C2-ENDOCYTOSIS CD44 & actBeta1 488 after Hypo 1-10 1min 2022 THIRD.lif - Cav1KO 3min Endo HYPO 1-10 7_serie_20_MAX-projection.tif:0240-0214	635.809	22.749	117.942	0	255	0.846123
	13	Channel_C2-ENDOCYTOSIS CD44 & actBeta1 488 after Hypo 1-10 1min 2022 THIRD.lif - Cav1WT 3min Endo HYPO 1-10 6_serie_6_MAX-projection.tif:0617-0713	392.972	17.512	103.353	0	255	0.770499		13	Channel_C2-ENDOCYTOSIS CD44 & actBeta1 488 after Hypo 1-10 1min 2022 THIRD.lif - Cav1KO 3min Endo HYPO 1-10 7_serie_20_MAX-projection.tif:0651-0760	329.311	25.828	158.752	0	255	0.960643
	14	Channel_C2-ENDOCYTOSIS CD44 & actBeta1 488 after Hypo 1-10 1min 2022 THIRD.lif - Cav1WT 3min Endo HYPO 1-10 7_serie_7_MAX-projection.tif:0530-0465	853.277	16.58	256.155	0	255	0.729493		14	Channel_C2-ENDOCYTOSIS CD44 & actBeta1 488 after Hypo 1-10 1min 2022 THIRD.lif - Cav1KO 3min Endo HYPO 1-10 8_serie_21_MAX-projection.tif:0505-0434	787.456	24.338	239.326	0	255	0.905224
	15	Channel_C2-ENDOCYTOSIS CD44 & actBeta1 488 after Hypo 1-10 1min 2022 THIRD.lif - Cav1WT 3min Endo HYPO 1-10 8_serie_8_MAX-projection.tif:0335-0434	567.788	15.741	163.188	0	255	0.692578		15	Channel_C2-ENDOCYTOSIS CD44 & actBeta1 488 after Hypo 1-10 1min 2022 THIRD.lif - Cav1KO 3min Endo HYPO 1-10 9_serie_22_MAX-projection.tif:0433-0484	372.961	23.305	120.626	0	255	0.866803
	16	Channel_C2-ENDOCYTOSIS CD44 & actBeta1 488 after Hypo 1-10 1min 2022 THIRD.lif - Cav1WT 3min Endo HYPO 1-10 8_serie_8_MAX-projection.tif:0678-0265	447.169	18.729	108.349	0	255	0.824045		16	Channel_C2-ENDOCYTOSIS CD44 & actBeta1 488 after Hypo 1-10 1min 2022 THIRD.lif - Cav1KO 3min Endo HYPO 1-10 10_serie_23_MAX-projection.tif:0346-0510	976.922	20.377	170.485	0	255	0.757899
	17	Channel_C2-ENDOCYTOSIS CD44 & actBeta1 488 after Hypo 1-10 1min 2022 THIRD.lif - Cav1WT 3min Endo HYPO 1-10 9_serie_9_MAX-projection.tif:0720-0498	2079.07	11.338	314.24	0	255	0.498853		17	Channel_C2-ENDOCYTOSIS CD44 & actBeta1 488 after Hypo 1-10 1min 2022 THIRD.lif - Cav1KO 3min Endo HYPO 1-10 11_serie_24_MAX-projection.tif:0431-0268	376.035	22.559	118.49	0	255	0.839056
	18	Channel_C2-ENDOCYTOSIS CD44 & actBeta1 488 after Hypo 1-10 1min 2022 THIRD.lif - Cav1WT 3min Endo HYPO 1-10 9_serie_9_MAX-projection.tif:0191-0537	596.219	14.775	243.013	0	255	0.650076		18	Channel_C2-ENDOCYTOSIS CD44 & actBeta1 488 after Hypo 1-10 1min 2022 THIRD.lif - Cav1KO 3min Endo HYPO 1-10 11_serie_24_MAX-projection.tif:0754-0706	317.398	27.964	91.276	0	255	1.04009
	19	Channel_C2-ENDOCYTOSIS CD44 & actBeta1 488 after Hypo 1-10 1min 2022 THIRD.lif - Cav1WT 3min Endo HYPO 1-10 10_serie_10_MAX-projection.tif:0416-0429	1641.01	12.839	253.874	0	255	0.564895		19	Channel_C2-ENDOCYTOSIS CD44 & actBeta1 488 after Hypo 1-10 1min 2022 THIRD.lif - Cav1KO 3min Endo HYPO 1-10 12_serie_25_MAX-projection.tif:0368-0570	1077.26	22.349	165.529	0	255	0.831246
	20	Channel_C2-ENDOCYTOSIS CD44 & actBeta1 488 after Hypo 1-10 1min 2022 THIRD.lif - Cav1WT 3min Endo HYPO 1-10 11_serie_11_MAX-projection.tif:0482-0427	1486.22	8.227	223.668	0	255	0.361975		20	Channel_C2-ENDOCYTOSIS CD44 & actBeta1 488 after Hypo 1-10 1min 2022 THIRD.lif - Cav1KO 3min Endo HYPO 1-10 12_serie_25_MAX-projection.tif:0829-0396	820.326	23.648	142.411	0	255	0.87956
	21	Channel_C2-ENDOCYTOSIS CD44 & actBeta1 488 after Hypo 1-10 1min 2022 THIRD.lif - Cav1WT 3min Endo HYPO 1-10 12_serie_12_MAX-projection.tif:0435-0441	1459.32	20.303	284.851	0	255	0.893299		21	Channel_C2-ENDOCYTOSIS CD44 & actBeta1 488 after Hypo 1-10 1min 2022 THIRD.lif - Cav1KO 3min Endo HYPO 1-10 13_serie_26_MAX-projection.tif:0440-0472	553.504	28.578	130.688	0	255	1.06293
	22	Channel_C2-ENDOCYTOSIS CD44 & actBeta1 488 after Hypo 1-10 1min 2022 THIRD.lif - Cav1WT 3min Endo HYPO 1-10 13_serie_13_MAX-projection.tif:0309-0539	755.013	25.598	136.627	0	255	1.12627		22	Channel_C2-ENDOCYTOSIS CD44 & actBeta1 488 after Hypo 1-10 1min 2022 THIRD.lif - Cav1KO 3min Endo HYPO 1-10_serie_14_MAX-projection.tif:0436-0514	1047.6	15.304	161.421	0	255	0.569215
	23	Channel_C2-ENDOCYTOSIS CD44 & actBeta1 488 after Hypo 1-10 1min 2022 THIRD.lif - Cav1WT 3min Endo HYPO 1-10 13_serie_13_MAX-projection.tif:0775-0395	311.419	25.017	86.167	0	255	1.10071
	24	Channel_C2-ENDOCYTOSIS CD44 & actBeta1 488 after Hypo 1-10 1min 2022 THIRD.lif - Cav1WT 3min Endo HYPO 1-10_serie_1_MAX-projection.tif:0360-0826	234.078	21.041	63.094	0	255	0.92577				Average	21.0907				0.784444
	25	Channel_C2-ENDOCYTOSIS CD44 & actBeta1 488 after Hypo 1-10 1min 2022 THIRD.lif - Cav1WT 3min Endo HYPO 1-10_serie_1_MAX-projection.tif:0455-0167	437.326	24.875	104.933	0	255	1.09446				SEM	0.944828				0.0351418
			Average	18.821				0.828091
			SEM	0.87243				0.0383855
			Average	20.7005				0.939326				Average	22.2442				0.759254
			SEM	2.04638				0.0556201				SEM	0.777299				0.0126717
	Cav1WT	Label	Area	Mean	Perimeter	MinThr	MaxThr			Cav1KO	Label	Area	Mean	Perimeter	MinThr	MaxThr
Hypoosmotic 1-20 1min	1	Channel_C2-ENDOCYTOSIS CD44 & actBeta1 488 after Hypo 1-20 1min 2022.lif - Cav1WT 3min Endo Hypo 1-20_serie_1_MAX-projection.tif:0481-0517	726.871	23.924	149.405	0	255	0.961137	Hypoosmotic 1-20 1min	1	Channel_C2-ENDOCYTOSIS CD44 & actBeta1 488 after Hypo 1-20 1min 2022.lif - Cav1KO 3min Endo Hypo 1-20 2_serie_17_MAX-projection.tif:0511-0467	472.85	24.029	205.315	0	255	0.75383
	2	Channel_C2-ENDOCYTOSIS CD44 & actBeta1 488 after Hypo 1-20 1min 2022.lif - Cav1WT 3min Endo Hypo 1-20 15_serie_15_MAX-projection.tif:0595-0543	328.083	19.994	150.15	0	255	0.803251		2	Channel_C2-ENDOCYTOSIS CD44 & actBeta1 488 after Hypo 1-20 1min 2022.lif - Cav1KO 3min Endo Hypo 1-20 3_serie_18_MAX-projection.tif:0244-0676	617.71	22.807	123.617	0	255	0.715494
	3	Channel_C2-ENDOCYTOSIS CD44 & actBeta1 488 after Hypo 1-20 1min 2022.lif - Cav1WT 3min Endo Hypo 1-20 14_serie_14_MAX-projection.tif:0428-0540	458.357	17.594	122.52	0	255	0.706832		3	Channel_C2-ENDOCYTOSIS CD44 & actBeta1 488 after Hypo 1-20 1min 2022.lif - Cav1KO 3min Endo Hypo 1-20 4_serie_19_MAX-projection.tif:0516-0584	380.661	25.291	141.622	0	255	0.793422
	4	Channel_C2-ENDOCYTOSIS CD44 & actBeta1 488 after Hypo 1-20 1min 2022.lif - Cav1WT 3min Endo Hypo 1-20 13_serie_13_MAX-projection.tif:0470-0545	993.262	13.96	263.645	0	255	0.560837		4	Channel_C2-ENDOCYTOSIS CD44 & actBeta1 488 after Hypo 1-20 1min 2022.lif - Cav1KO 3min Endo Hypo 1-20 5_serie_30_MAX-projection.tif:0434-0648	342.567	30.872	84.898	0	255	0.968507
	5	Channel_C2-ENDOCYTOSIS CD44 & actBeta1 488 after Hypo 1-20 1min 2022.lif - Cav1WT 3min Endo Hypo 1-20 11_serie_11_MAX-projection.tif:0429-0591	350.48	20.831	130.679	0	255	0.836877		5	Channel_C2-ENDOCYTOSIS CD44 & actBeta1 488 after Hypo 1-20 1min 2022.lif - Cav1KO 3min Endo Hypo 1-20 6_serie_20_MAX-projection.tif:0459-0514	430.732	26.478	144.451	0	255	0.83066
	6	Channel_C2-ENDOCYTOSIS CD44 & actBeta1 488 after Hypo 1-20 1min 2022.lif - Cav1WT 3min Endo Hypo 1-20 10_serie_10_MAX-projection.tif:0491-0524	1856.16	14.841	368.759	0	255	0.596231		6	Channel_C2-ENDOCYTOSIS CD44 & actBeta1 488 after Hypo 1-20 1min 2022.lif - Cav1KO 3min Endo Hypo 1-20 7_serie_29_MAX-projection.tif:0387-0668	289.549	29.73	81.85	0	255	0.932681
	7	Channel_C2-ENDOCYTOSIS CD44 & actBeta1 488 after Hypo 1-20 1min 2022.lif - Cav1WT 3min Endo Hypo 1-20 9_serie_9_MAX-projection.tif:0592-0498	1822.78	26.818	346.127	0	255	1.0774		7	Channel_C2-ENDOCYTOSIS CD44 & actBeta1 488 after Hypo 1-20 1min 2022.lif - Cav1KO 3min Endo Hypo 1-20 7_serie_29_MAX-projection.tif:0675-0690	442.658	25.108	103.042	0	255	0.787681
	8	Channel_C2-ENDOCYTOSIS CD44 & actBeta1 488 after Hypo 1-20 1min 2022.lif - Cav1WT 3min Endo Hypo 1-20 8_serie_8_MAX-projection.tif:0456-0485	415.941	23.299	115.165	0	255	0.936028		8	Channel_C2-ENDOCYTOSIS CD44 & actBeta1 488 after Hypo 1-20 1min 2022.lif - Cav1KO 3min Endo Hypo 1-20 8_serie_21_MAX-projection.tif:0516-0646	762.391	26.085	267.543	0	255	0.818331
	9	Channel_C2-ENDOCYTOSIS CD44 & actBeta1 488 after Hypo 1-20 1min 2022.lif - Cav1WT 3min Endo Hypo 1-20 7_serie_7_MAX-projection.tif:0430-0575	504.595	10.048	122.648	0	255	0.403674		9	Channel_C2-ENDOCYTOSIS CD44 & actBeta1 488 after Hypo 1-20 1min 2022.lif - Cav1KO 3min Endo Hypo 1-20 9_serie_22_MAX-projection.tif:0564-0403	624.116	26.678	188.834	0	255	0.836934
	10	Channel_C2-ENDOCYTOSIS CD44 & actBeta1 488 after Hypo 1-20 1min 2022.lif - Cav1WT 3min Endo Hypo 1-20 6_serie_6_MAX-projection.tif:0506-0417	510.639	12.155	149.603	0	255	0.488322		10	Channel_C2-ENDOCYTOSIS CD44 & actBeta1 488 after Hypo 1-20 1min 2022.lif - Cav1KO 3min Endo Hypo 1-20 10_serie_23_MAX-projection.tif:0543-0613	331.863	28.477	100.896	0	255	0.893372
	11	Channel_C2-ENDOCYTOSIS CD44 & actBeta1 488 after Hypo 1-20 1min 2022.lif - Cav1WT 3min Endo Hypo 1-20 3_serie_3_MAX-projection.tif:0502-0467	336.338	20.903	144.353	0	255	0.839769		11	Channel_C2-ENDOCYTOSIS CD44 & actBeta1 488 after Hypo 1-20 1min 2022.lif - Cav1KO 3min Endo Hypo 1-20 11_serie_24_MAX-projection.tif:0426-0522	1032.87	19.801	144.164	0	255	0.621191
	12	Channel_C2-ENDOCYTOSIS CD44 & actBeta1 488 after Hypo 1-20 1min 2022.lif - Cav1WT 3min Endo Hypo 1-20 2_serie_2_MAX-projection.tif:0500-0471	823.762	15.243	119.603	0	255	0.612381		12	Channel_C2-ENDOCYTOSIS CD44 & actBeta1 488 after Hypo 1-20 1min 2022.lif - Cav1KO 3min Endo Hypo 1-20 12_serie_25_MAX-projection.tif:0408-0500	1215.82	22.947	159.682	0	255	0.719886
	13	Channel_C2-ENDOCYTOSIS CD44 & actBeta1 488 after Hypo 1-20 1min 2022 SECOND.lif - Cav1WT 3min Endo Hypo 1-20 2_serie_2_MAX-projection.tif:0455-0525	1405.47	20.333	186.37	0	255	0.81687		13	Channel_C2-ENDOCYTOSIS CD44 & actBeta1 488 after Hypo 1-20 1min 2022.lif - Cav1KO 3min Endo Hypo 1-20 13_serie_26_MAX-projection.tif:0556-0688	906.595	22.446	207.915	0	255	0.704169
	14	Channel_C2-ENDOCYTOSIS CD44 & actBeta1 488 after Hypo 1-20 1min 2022 SECOND.lif - Cav1WT 3min Endo Hypo 1-20 5_serie_5_MAX-projection.tif:0597-0600	2051.44	18.431	314.111	0	255	0.740458		14	Channel_C2-ENDOCYTOSIS CD44 & actBeta1 488 after Hypo 1-20 1min 2022.lif - Cav1KO 3min Endo Hypo 1-20 14_serie_27_MAX-projection.tif:0438-0535	830.242	30.749	174.004	0	255	0.964648
										15	Channel_C2-ENDOCYTOSIS CD44 & actBeta1 488 after Hypo 1-20 1min 2022.lif - Cav1KO 3min Endo Hypo 1-20 15_serie_28_MAX-projection.tif:0532-0448	1133.93	21.948	248.17	0	255	0.688546
			Average	18.4553				0.741433
			SEM	1.2743				0.0511946				Average	25.5631				0.801957
												SEM	0.862847				0.027069
										1	Channel_C2-ENDOCYTOSIS CD44 & actBeta1 488 after Hypo 1-20 1min 2022.lif - Cav1KO 3min Endo Hypo 1-20_serie_16_MAX-projection.tif:0566-0551	833.844	19.173	198.366	0	255	0.655244
	1	Channel_C2-ENDOCYTOSIS CD44 & actBeta1 488 after Hypo 1-20 1min 2022 SECOND.lif - Cav1WT 3min Endo Hypo 1-20 6_serie_6_MAX-projection.tif:0304-0353	671.964	20.117	137.699	0	255	1.08137		2	Channel_C2-ENDOCYTOSIS CD44 & actBeta1 488 after Hypo 1-20 1min 2022 SECOND.lif - Cav1KO 3min Endo Hypo 1-20 2_serie_14_MAX-projection.tif:0511-0622	809.262	31.398	125.944	0	255	1.07304
	2	Channel_C2-ENDOCYTOSIS CD44 & actBeta1 488 after Hypo 1-20 1min 2022 SECOND.lif - Cav1WT 3min Endo Hypo 1-20 7_serie_7_MAX-projection.tif:0444-0485	1421.24	17.237	199.545	0	255	0.926557		3	Channel_C2-ENDOCYTOSIS CD44 & actBeta1 488 after Hypo 1-20 1min 2022 SECOND.lif - Cav1KO 3min Endo Hypo 1-20 3_serie_15_MAX-projection.tif:0512-0507	961.601	19.585	216.453	0	255	0.669325
	3	Channel_C2-ENDOCYTOSIS CD44 & actBeta1 488 after Hypo 1-20 1min 2022 SECOND.lif - Cav1WT 3min Endo Hypo 1-20 8_serie_8_MAX-projection.tif:0533-0276	1533.47	21.394	247.902	0	255	1.15001		4	Channel_C2-ENDOCYTOSIS CD44 & actBeta1 488 after Hypo 1-20 1min 2022 SECOND.lif - Cav1KO 3min Endo Hypo 1-20 4_serie_16_MAX-projection.tif:0568-0620	862.368	22.468	202.066	0	255	0.767852
	4	Channel_C2-ENDOCYTOSIS CD44 & actBeta1 488 after Hypo 1-20 1min 2022 SECOND.lif - Cav1WT 3min Endo Hypo 1-20 9_serie_9_MAX-projection.tif:0558-0506	2282.62	18.864	327.68	0	255	1.01402		5	Channel_C2-ENDOCYTOSIS CD44 & actBeta1 488 after Hypo 1-20 1min 2022 SECOND.lif - Cav1KO 3min Endo Hypo 1-20 5_serie_17_MAX-projection.tif:0441-0537	448.704	28.634	125.657	0	255	0.978578
	5	Channel_C2-ENDOCYTOSIS CD44 & actBeta1 488 after Hypo 1-20 1min 2022 SECOND.lif - Cav1WT 3min Endo Hypo 1-20 10_serie_10_MAX-projection.tif:0517-0473	2313.77	15.307	294.258	0	255	0.822812		6	Channel_C2-ENDOCYTOSIS CD44 & actBeta1 488 after Hypo 1-20 1min 2022 SECOND.lif - Cav1KO 3min Endo Hypo 1-20 6_serie_18_MAX-projection.tif:0469-0558	1674.94	18.569	222.226	0	255	0.634603
	6	Channel_C2-ENDOCYTOSIS CD44 & actBeta1 488 after Hypo 1-20 1min 2022 SECOND.lif - Cav1WT 3min Endo Hypo 1-20 11_serie_11_MAX-projection.tif:0492-0538	836.13	14.3	119.933	0	255	0.768682		7	Channel_C2-ENDOCYTOSIS CD44 & actBeta1 488 after Hypo 1-20 1min 2022 SECOND.lif - Cav1KO 3min Endo Hypo 1-20 7_serie_19_MAX-projection.tif:0731-0588	878.62	26.218	195.117	0	255	0.89601
	7	Channel_C2-ENDOCYTOSIS CD44 & actBeta1 488 after Hypo 1-20 1min 2022 SECOND.lif - Cav1WT 3min Endo Hypo 1-20 12_serie_12_MAX-projection.tif:0524-0612	1377.52	20.635	254.392	0	255	1.10921		8	Channel_C2-ENDOCYTOSIS CD44 & actBeta1 488 after Hypo 1-20 1min 2022 SECOND.lif - Cav1KO 3min Endo Hypo 1-20 7_serie_19_MAX-projection.tif:0357-0431	1141.76	25.468	157.969	0	255	0.870378
	8	Channel_C2-ENDOCYTOSIS CD44 & actBeta1 488 after Hypo 1-20 1min 2022 SECOND.lif - Cav1WT 3min Endo Hypo 1-20_serie_1_MAX-projection.tif:0412-0198	693.926	16.816	132.497	0	255	0.903927		9	Channel_C2-ENDOCYTOSIS CD44 & actBeta1 488 after Hypo 1-20 1min 2022 SECOND.lif - Cav1KO 3min Endo Hypo 1-20 8_serie_20_MAX-projection.tif:0488-0507	1713.18	24.221	294.207	0	255	0.827762
	9	Channel_C2-ENDOCYTOSIS CD44 & actBeta1 488 after Hypo 1-20 1min 2022 SECOND.lif - Cav1WT 3min Endo Hypo 1-20_serie_1_MAX-projection.tif:0691-0665	684.125	13.347	124.575	0	255	0.717454		10	Channel_C2-ENDOCYTOSIS CD44 & actBeta1 488 after Hypo 1-20 1min 2022 SECOND.lif - Cav1KO 3min Endo Hypo 1-20 9_serie_21_MAX-projection.tif:0515-0503	1073.42	25.089	274.614	0	255	0.857426
	10	Channel_C2-ENDOCYTOSIS CD44 & actBeta1 488 after Hypo 1-20 1min 2022 THIRD.lif - Cav1WT 3min Endo HYPO 1-20 2_serie_2_MAX-projection.tif:0356-0357	698.884	13.051	146.35	0	255	0.701543		11	Channel_C2-ENDOCYTOSIS CD44 & actBeta1 488 after Hypo 1-20 1min 2022 SECOND.lif - Cav1KO 3min Endo Hypo 1-20 10_serie_22_MAX-projection.tif:0392-0527	1903.67	19.455	397.006	0	255	0.664882
	11	Channel_C2-ENDOCYTOSIS CD44 & actBeta1 488 after Hypo 1-20 1min 2022 THIRD.lif - Cav1WT 3min Endo HYPO 1-20 2_serie_2_MAX-projection.tif:0709-0676	473.512	18.196	103.193	0	255	0.978107		12	Channel_C2-ENDOCYTOSIS CD44 & actBeta1 488 after Hypo 1-20 1min 2022 SECOND.lif - Cav1KO 3min Endo Hypo 1-20 11_serie_23_MAX-projection.tif:0472-0433	1448.99	24.068	204.664	0	255	0.822533
			Average	17.2058				0.924881				Average	23.6955				0.809803
			SEM	0.883487				0.0474909				SEM	1.16352				0.0397636
	1	Channel_C2-ENDOCYTOSIS CD44 & actBeta1 488 after Hypo 1-20 1min 2022 THIRD.lif - Cav1WT 3min Endo HYPO 1-20 3_serie_3_MAX-projection.tif:0394-0449	965.241	15.075	198.091	0	255	0.663275		1	Channel_C2-ENDOCYTOSIS CD44 & actBeta1 488 after Hypo 1-20 1min 2022 SECOND.lif - Cav1KO 3min Endo Hypo 1-20 12_serie_24_MAX-projection.tif:0506-0458	635.804	38.117	148.619	0	255	1.41772
	2	Channel_C2-ENDOCYTOSIS CD44 & actBeta1 488 after Hypo 1-20 1min 2022 THIRD.lif - Cav1WT 3min Endo HYPO 1-20 4_serie_4_MAX-projection.tif:0256-0307	753.258	17.318	130.145	0	255	0.761964		2	Channel_C2-ENDOCYTOSIS CD44 & actBeta1 488 after Hypo 1-20 1min 2022 SECOND.lif - Cav1KO 3min Endo Hypo 1-20_serie_13_MAX-projection.tif:0492-0285	1698.98	21.417	305.743	0	255	0.796581
	3	Channel_C2-ENDOCYTOSIS CD44 & actBeta1 488 after Hypo 1-20 1min 2022 THIRD.lif - Cav1WT 3min Endo HYPO 1-20 4_serie_4_MAX-projection.tif:0708-0713	1034.74	16.389	209.406	0	255	0.721089		3	Channel_C2-ENDOCYTOSIS CD44 & actBeta1 488 after Hypo 1-20 1min 2022 THIRD.lif - Cav1KO 3min Endo HYPO 1-20 3_serie_15_MAX-projection.tif:0645-0237	746.995	21.093	168.624	0	255	0.78453
	4	Channel_C2-ENDOCYTOSIS CD44 & actBeta1 488 after Hypo 1-20 1min 2022 THIRD.lif - Cav1WT 3min Endo HYPO 1-20 4_serie_4_MAX-projection.tif:0732-0210	555.974	16.664	111.152	0	255	0.733189		4	Channel_C2-ENDOCYTOSIS CD44 & actBeta1 488 after Hypo 1-20 1min 2022 THIRD.lif - Cav1KO 3min Endo HYPO 1-20 4_serie_16_MAX-projection.tif:0307-0388	1339.7	18.54	169.732	0	255	0.689574
	5	Channel_C2-ENDOCYTOSIS CD44 & actBeta1 488 after Hypo 1-20 1min 2022 THIRD.lif - Cav1WT 3min Endo HYPO 1-20_serie_1_MAX-projection.tif:0729-0443	239.003	16.692	155.411	0	255	0.734421		5	Channel_C2-ENDOCYTOSIS CD44 & actBeta1 488 after Hypo 1-20 1min 2022 THIRD.lif - Cav1KO 3min Endo HYPO 1-20 4_serie_16_MAX-projection.tif:0754-0664	1407.86	18.463	164.024	0	255	0.68671
	6	Channel_C2-ENDOCYTOSIS CD44 & actBeta1 488 after Hypo 1-20 1min 2022 THIRD.lif - Cav1WT 3min Endo HYPO 1-20 5_serie_5_MAX-projection.tif:0507-0738	1112.78	13.167	196.368	0	255	0.579326		6	Channel_C2-ENDOCYTOSIS CD44 & actBeta1 488 after Hypo 1-20 1min 2022 THIRD.lif - Cav1KO 3min Endo HYPO 1-20 5_serie_17_MAX-projection.tif:0342-0572	1489.11	17.913	165.147	0	255	0.666254
	7	Channel_C2-ENDOCYTOSIS CD44 & actBeta1 488 after Hypo 1-20 1min 2022 THIRD.lif - Cav1WT 3min Endo HYPO 1-20 5_serie_5_MAX-projection.tif:0716-0298	628.867	13.319	178.843	0	255	0.586014		7	Channel_C2-ENDOCYTOSIS CD44 & actBeta1 488 after Hypo 1-20 1min 2022 THIRD.lif - Cav1KO 3min Endo HYPO 1-20 6_serie_18_MAX-projection.tif:0294-0417	500.407	30.158	123.857	0	255	1.12169
	8	Channel_C2-ENDOCYTOSIS CD44 & actBeta1 488 after Hypo 1-20 1min 2022 THIRD.lif - Cav1WT 3min Endo HYPO 1-20 6_serie_6_MAX-projection.tif:0456-0541	1775.51	13.687	256.224	0	255	0.602206		8	Channel_C2-ENDOCYTOSIS CD44 & actBeta1 488 after Hypo 1-20 1min 2022 THIRD.lif - Cav1KO 3min Endo HYPO 1-20 6_serie_18_MAX-projection.tif:0623-0582	846.109	24.975	196.7	0	255	0.928917
	9	Channel_C2-ENDOCYTOSIS CD44 & actBeta1 488 after Hypo 1-20 1min 2022 THIRD.lif - Cav1WT 3min Endo HYPO 1-20 7_serie_7_MAX-projection.tif:0478-0441	560.057	20.55	170.87	0	255	0.904166		9	Channel_C2-ENDOCYTOSIS CD44 & actBeta1 488 after Hypo 1-20 1min 2022 THIRD.lif - Cav1KO 3min Endo HYPO 1-20 7_serie_19_MAX-projection.tif:0508-0352	1588.04	20.105	168.319	0	255	0.747783
	10	Channel_C2-ENDOCYTOSIS CD44 & actBeta1 488 after Hypo 1-20 1min 2022 THIRD.lif - Cav1WT 3min Endo HYPO 1-20 8_serie_8_MAX-projection.tif:0445-0302	723.932	23.202	140.819	0	255	1.02085		10	Channel_C2-ENDOCYTOSIS CD44 & actBeta1 488 after Hypo 1-20 1min 2022 THIRD.lif - Cav1KO 3min Endo HYPO 1-20 8_serie_20_MAX-projection.tif:0419-0511	419.494	30.935	113.258	0	255	1.15059
	11	Channel_C2-ENDOCYTOSIS CD44 & actBeta1 488 after Hypo 1-20 1min 2022 THIRD.lif - Cav1WT 3min Endo HYPO 1-20 8_serie_8_MAX-projection.tif:0548-0862	469.014	20	90.452	0	255	0.879967		11	Channel_C2-ENDOCYTOSIS CD44 & actBeta1 488 after Hypo 1-20 1min 2022 THIRD.lif - Cav1KO 3min Endo HYPO 1-20_serie_13_MAX-projection.tif:0752-0200	542.133	29.619	104.059	0	255	1.10164
	12	Channel_C2-ENDOCYTOSIS CD44 & actBeta1 488 after Hypo 1-20 1min 2022 THIRD.lif - Cav1WT 3min Endo HYPO 1-20 10_serie_10_MAX-projection.tif:0489-0577	1276.88	21.668	205.654	0	255	0.953357		12	Channel_C2-ENDOCYTOSIS CD44 & actBeta1 488 after Hypo 1-20 1min 2022 THIRD.lif - Cav1KO 3min Endo HYPO 1-20_serie_13_MAX-projection.tif:0404-0772	824.135	26.794	119.774	0	255	0.996572
	13	Channel_C2-ENDOCYTOSIS CD44 & actBeta1 488 after Hypo 1-20 1min 2022 THIRD.lif - Cav1WT 3min Endo HYPO 1-20 11_serie_11_MAX-projection.tif:0538-0499	1531.9	17.614	235.651	0	255	0.774987
	14	Channel_C2-ENDOCYTOSIS CD44 & actBeta1 488 after Hypo 1-20 1min 2022 THIRD.lif - Cav1WT 3min Endo HYPO 1-20 12_serie_12_MAX-projection.tif:0623-0559	1310.4	16.088	291.868	0	255	0.707846				Average	24.8441				0.924047
												SEM	1.83588				0.0682835
			Average	17.2452				0.758761
			SEM	0.831488				0.0365841
			Average	17.6354				0.808359				Average	24.7009				0.845269
			SEM	0.410081				0.0584756				SEM	0.543854				0.0394543
