# Supplementary material for: Caveolae couple mechanical stress to integrin recycling and activation
Source: eLife. 2022 Oct 20;11:e82348. doi: 10.7554/eLife.82348 (PMC9747151; doi:10.7554/eLife.82348)
Supplement: Figure 7—figure supplement 1—source data 1. [file elife-82348-fig7-figsupp1-data1.xlsx]

## Sheet: Tweezing panel 5I-5J
	Tweezing experiment
	WT	Fibronectin WT 9EG7 Control					Fibronectin WT 9EG7 Magnetized					KO	Fibronectin KO 9EG7 Control					Fibronectin KO 9EG7 Magnetized
2015-08-05	Bead Number	Area	Mean	Perim	Normalized Mean Intensity		Area	Mean	Perim	Normalized Mean Intensity		Bead Number	Area	Mean	Perim	Normalized Mean Intensity		Area	Mean	Perim	Normalized Mean Intensity
	1	33.597	6.087	20.561	0.181177		42.43	3.351	23.077	0.0789771		1	36.98	21.784	21.55	0.589075		33.995	3.763	20.674	0.110693
	2	38.441	3.494	21.951	0.0908925		42.43	6.37	23.077	0.15013		2	30.61	35.926	19.64	1.17367		33.995	11.638	20.674	0.342344
	3	42.185	3.966	23.016	0.0940145		37.303	5.069	21.604	0.135887		3	35.735	9.117	21.175	0.255128		30.801	3.573	19.64	0.116003
	4	42.185	3.552	23.016	0.0842005		37.303	0.425	21.604	0.0113932		4	49.322	10.666	24.857	0.216252		30.801	24.08	19.64	0.781793
	5	31.842	4.021	19.968	0.12628		34.693	1.217	20.868	0.0350791		5	33.597	1.788	20.561	0.053219		30.801	9.662	19.64	0.313691
	6	37.872	4.446	21.788	0.117395		42.43	1.308	23.077	0.0308272		6	32.425	1.117	20.157	0.0344487		32.558	4.194	20.218	0.128816
	7	37.872	4.737	21.788	0.125079		48.007	2.325	24.55	0.0484304		7	24.794	5.577	17.676	0.224933		32.558	25.304	20.218	0.777198
	8	38.971	0.972	22.095	0.0249416		50.42	2.491	25.164	0.049405		8	23.524	3.172	17.185	0.134841		32.558	23.185	20.218	0.712114
	9	36.379	5.915	21.373	0.162594		50.42	1.597	25.164	0.0316739		9	24.794	3.41	17.676	0.137533		39.838	9.229	22.368	0.231663
	10	40.658	5.287	22.586	0.130036		40.504	2.813	22.529	0.0694499		10	40.504	3.97	22.529	0.098015		39.838	16.512	22.368	0.414479
	11	40.658	1.999	22.586	0.0491662		40.72	0.886	22.586	0.0217583		11	33.927	7.768	20.622	0.228962		39.838	37.472	22.368	0.940609
	12	38.441	5.718	21.951	0.148747		42.831	2.187	23.186	0.0510611		12	37.303	14.734	21.604	0.394982		47.997	4.503	24.55	0.0938184
	13	38.441	1.277	21.951	0.0332197		51.492	2.854	25.417	0.0554261		13	37.303	11.794	21.604	0.316168		47.997	3.867	24.55	0.0805675
	14	40.23	6.971	22.446	0.173279		38.441	5.8	21.951	0.150881		14	37.303	4.685	21.604	0.125593		39.464	2.797	22.24	0.0708747
	15	40.23	5.676	22.446	0.141089		56.967	5.361	26.733	0.0941071		15	30.61	2.337	19.64	0.0763476		36.655	12.104	21.449	0.330214
	16	53.341	3.551	27.074	0.0665717		56.967	4.152	26.733	0.0728843		16	24.238	3.99	17.431	0.164618		36.655	10.388	21.449	0.283399
	17	26.857	2.535	18.348	0.0943888		56.967	5.25	26.733	0.0921586		17	39.749	13.755	22.341	0.346046		36.655	16.07	21.449	0.438412
	18	26.857	2.474	18.348	0.0921175		53.892	5.003	25.994	0.0928338		18	26.284	13.839	18.167	0.526518		36.655	14.331	21.449	0.39097
	19	42.185	3.326	23.016	0.0788432		39.749	3.721	22.341	0.0936124		19	32.268	8.213	20.131	0.254525		46.727	12.987	24.223	0.277934
	20	44.551	3.282	23.63	0.0736684		39.464	2.65	22.24	0.0671498		20	37.514	10.41	21.708	0.277496		31.654	3.367	19.929	0.106369
	21	44.551	3.722	23.63	0.0835447							21	37.514	8.027	21.708	0.213973		39.838	8.58	22.368	0.215372
	22	44.551	6.635	23.63	0.14893							22	37.514	5.969	21.708	0.159114		42.823	36.761	23.147	0.858441
	23	44.078	3.175	23.568	0.0720314							23	25.905	33.57	18.004	1.29589		42.823	10.918	23.147	0.254956
	24	44.078	11.366	23.568	0.257861							24	25.905	21.2	18.004	0.818375		42.823	12.303	23.147	0.287299
												25	29.264	8.712	19.149	0.297704		42.823	11.307	23.147	0.26404
				Average	0.11042					0.0716563		26	20.983	11.281	16.203	0.537626		42.823	9.968	23.147	0.232772
												27	20.983	12.999	16.203	0.619502		48.936	13.553	24.809	0.276954
												28	20.983	17.92	16.203	0.854025		36.98	3.205	21.55	0.0866685
												29	32.268	9.619	20.131	0.298097		36.98	4.199	21.55	0.113548
												30	32.268	12.318	20.131	0.38174		36.98	2.911	21.55	0.0787182
												31	32.268	9.224	20.131	0.285856		36.98	2.193	21.55	0.0593023
												32	24.794	17.026	17.676	0.686698		36.98	1.449	21.55	0.0391833
												33	31.566	2.603	19.886	0.0824621		49.091	3.621	24.839	0.073761
																		63.626	6.593	28.233	0.103621
															Average	0.368468		63.626	10.793	28.233	0.169632
																				Average	0.287321
2015-02-09
	1	94.655	61.544	34.476	0.650193		85.097	21.174	32.693	0.248822		1	70.741	56.674	29.721	0.801148		97.842	78.403	35.071	0.801323
	2	94.655	46.195	34.476	0.488035		85.097	21.997	32.693	0.258493		2	70.741	153.261	29.721	2.16651		97.842	150.49	35.071	1.53809
	3	94.655	68.907	34.476	0.727981		85.097	35.024	32.693	0.411577		3	70.741	54.102	29.721	0.76479		97.842	101.012	35.071	1.0324
	4	94.655	55.481	34.476	0.586139		111.875	29.405	37.448	0.262838		4	70.741	29.463	29.721	0.416491		70.741	51.51	29.721	0.728149
	5	94.655	23.124	34.476	0.244298		111.875	19.26	37.448	0.172156		5	70.741	61.44	29.721	0.86852		70.741	61.864	29.721	0.874514
	6	35.223	57.507	21.012	1.63265		111.875	19.103	37.448	0.170753		6	70.741	34.349	29.721	0.48556		70.741	77.965	29.721	1.10212
	7	35.223	79.433	21.012	2.25515		73.497	41.135	30.315	0.559683		7	88.498	16.924	33.287	0.191236		70.741	110.759	29.721	1.5657
	8	40.033	67.866	22.394	1.69525		73.497	38.122	30.315	0.518688		8	88.498	193.152	33.287	2.18256		82.054	112.134	32.099	1.36659
	9	40.033	48.188	22.394	1.20371							9	88.498	142.553	33.287	1.6108		82.054	96.66	32.099	1.178
	10	47.181	53.752	24.33	1.13927				Average	0.325376		10	88.498	45.697	33.287	0.516362		82.054	27.037	32.099	0.329503
	11	47.181	54.769	24.33	1.16083													82.054	31.854	32.099	0.388208
	12	54.706	47.68	26.218	0.871568		53.316	82.752	25.875	1.5521					Average	1.0004		82.054	24.162	32.099	0.294465
	13	54.706	78.391	26.218	1.43295		53.316	55.633	25.875	1.04346								82.054	41.273	32.099	0.502998
							53.316	31.595	25.875	0.592599		1	42.27	88.334	23.029	2.08976
				Average	1.08369							2	42.27	102.231	23.029	2.41852				Average	0.900158
									Average	1.06272		3	42.27	39.421	23.029	0.9326
												4	42.27	35.909	23.029	0.849515		93.601	124.786	34.266	1.33317
	1	47.591	42.508	24.444	0.893194		45.091	29.845	23.777	0.661884								42.564	86.656	23.077	2.0359
	2	47.591	28.992	24.444	0.609191		64.031	37.045	28.322	0.578548					Average	1.5726		42.564	72.123	23.077	1.69446
	3	47.591	30.573	24.444	0.642411		71.798	27.838	38.365	0.387727								50.294	56.215	25.175	1.11773
	4	47.591	32.852	24.444	0.690299		71.798	38.799	38.365	0.540391		1	46.391	70.202	24.126	1.51327		50.294	136.594	25.175	2.71591
	5	48.3	44.39	24.671	0.919048							2	46.391	88.634	24.126	1.91059
	6	48.3	36.061	24.671	0.746605				Average	0.542137		3	46.391	127.645	24.126	2.7515				Average	1.77943
	7	48.3	51.837	24.671	1.07323							4	46.391	94.676	24.126	2.04083
	8	51.991	33.044	25.525	0.635572		42.069	47.831	22.984	1.13697		5	52.46	113.422	25.642	2.16207		43.336	34.471	23.307	0.795436
	9	51.991	28.121	25.525	0.540882		51.361	49.806	25.362	0.969724		6	52.46	68.309	25.642	1.30212		43.336	116.05	23.307	2.67791
	10	51.991	40.512	25.525	0.779212		51.361	43.233	25.362	0.841748		7	52.46	45.19	25.642	0.861418		43.336	132.601	23.307	3.05983
	11	43.617	28.727	23.427	0.658619		51.361	29.295	25.362	0.570374		8	49.392	67.708	24.86	1.37083		46.33	21.048	24.126	0.454306
	12	43.617	43.383	23.427	0.994635		52.713	41.955	25.758	0.795914		9	49.392	29.399	24.86	0.595218		46.33	63.636	24.126	1.37354
	13	43.617	20.987	23.427	0.481166		52.713	31.666	25.758	0.600725		10	49.392	38.638	24.86	0.782272		46.33	31.367	24.126	0.677034
	14	43.617	45.528	23.427	1.04381		52.713	65.455	25.758	1.24172		11	43.303	104.736	23.301	2.41868		53.316	77.087	25.875	1.44585
	15	43.617	35.706	23.427	0.818626		52.713	35.512	25.758	0.673686		12	43.303	52.636	23.301	1.21553		53.316	101.233	25.875	1.89874
	16	47.717	30.193	24.476	0.632751		49.722	25.94	24.966	0.521701		13	43.303	70.926	23.301	1.6379		70.374	111.063	29.721	1.57818
	17	47.717	57.371	24.476	1.20232		49.722	35.092	24.966	0.705764		14	43.122	80.117	23.272	1.85791		70.374	157.77	29.721	2.24188
	18	47.717	61.907	24.476	1.29738		49.722	27.055	24.966	0.544125		15	43.122	91.136	23.272	2.11345		70.374	95.684	29.721	1.35965
	19	47.717	60.518	24.476	1.26827		49.722	37.207	24.966	0.748301		16	43.122	48.818	23.272	1.13209		70.374	78.649	29.721	1.11759
	20	47.717	49.593	24.476	1.03932		63.151	9.971	28.136	0.157891		17	43.122	20.676	23.272	0.479477		60.761	100.571	27.623	1.65519
	21	49.166	42.062	24.826	0.85551		63.151	27.297	28.136	0.43225		18	43.122	47.77	23.272	1.10779		60.761	208.221	27.623	3.42689
	22	49.166	46.187	24.826	0.939409		63.151	25.322	28.136	0.400975		19	43.122	60.384	23.272	1.40031		60.761	199.209	27.623	3.27857
	23	49.166	49.043	24.826	0.997498		63.151	20.461	28.136	0.324001		20	43.122	50.658	23.272	1.17476		60.761	194.814	27.623	3.20623
	24	49.166	52.591	24.826	1.06966		63.151	44.307	28.136	0.701604		21	43.183	111.927	23.29	2.59192		60.761	161.641	27.623	2.66028
	25	49.166	51.709	24.826	1.05172		63.151	21.207	28.136	0.335814		22	43.183	66.102	23.29	1.53074		50.294	92.752	25.175	1.8442
	26	49.166	50.339	24.826	1.02386		40.748	31.472	22.588	0.772357		23	51.938	55.344	25.508	1.06558		82.6	47.932	32.169	0.580291
	27	49.166	32.268	24.826	0.656307		57.916	38.624	26.947	0.666897		24	40.262	93.746	22.458	2.3284
							57.916	24.371	26.947	0.420799		25	43.684	17.398	23.421	0.398269				Average	1.85956
				Average	0.872611		57.916	21.843	26.947	0.37715		26	43.684	29.583	23.421	0.677204
							57.916	43.09	26.947	0.744009		27	53.63	30.051	25.953	0.560339		49.722	41.172	24.966	0.828044
	1	76.246	25.665	30.91	0.336608		68.481	23.825	29.325	0.347907		28	48.884	43.18	24.776	0.883316		49.722	63.358	24.966	1.27424
	2	76.246	28.069	30.91	0.368137		68.481	31.218	29.325	0.455864		29	48.884	92.728	24.776	1.8969		49.722	73.142	24.966	1.47102
	3	76.246	39.307	30.91	0.515529		68.481	69.565	29.325	1.01583		30	48.884	115.41	24.776	2.3609		49.722	39.069	24.966	0.785749
	4	76.246	36.714	30.91	0.48152		68.481	83.04	29.325	1.2126		31	48.884	62.628	24.776	1.28116		49.722	70.615	24.966	1.4202
	5	68.481	29.837	29.325	0.435697		68.481	75.676	29.325	1.10507		32	48.884	82.672	24.776	1.69119		64.599	60.633	28.532	0.938606
	6	68.481	33.39	29.325	0.48758		68.481	44.338	29.325	0.64745		33	44.035	49.753	23.515	1.12985		64.599	56.52	28.532	0.874936
	7	68.481	28.87	29.325	0.421577							34	44.035	42.816	23.515	0.972317		64.599	44.337	28.532	0.686342
	8	54.67	17.936	26.154	0.328078				Average	0.671352		35	44.035	48.504	23.515	1.10149		64.599	44.369	28.532	0.686837
	9	54.67	21.311	26.154	0.389812							36	44.035	46.814	23.515	1.06311		64.599	37.675	28.532	0.583213
	10	54.67	34.359	26.154	0.62848													48.115	83.593	24.569	1.73736
	11	52.713	19.572	25.758	0.371294										Average	1.42669		48.115	121.888	24.569	2.53326
	12	52.713	21.475	25.758	0.407395													48.115	69.551	24.569	1.44552
	13	57.916	31.88	26.947	0.550452							1	52.713	47.645	25.758	0.903857		48.115	49.139	24.569	1.02128
	14	57.916	40.849	26.947	0.705315							2	52.713	98.872	25.758	1.87567		110.55	70.802	37.25	0.640452
	15	57.916	25.875	26.947	0.446768							3	52.713	72.735	25.758	1.37983		46.667	185.521	24.173	3.97542
												4	52.713	81.233	25.758	1.54104		63.151	72.71	28.136	1.15137
				Average	0.458283							5	52.713	32.943	25.758	0.62495		63.151	44.216	28.136	0.700163
												6	78.273	94.065	31.318	1.20176		49.722	93.716	24.966	1.8848
												7	46.193	61.144	24.091	1.32366		49.722	100.125	24.966	2.0137
												8	46.193	47.246	24.091	1.0228		49.722	149.795	24.966	3.01265
				TOTAL	0.501285				TOTAL	0.468912		9	51.361	33.951	25.362	0.661027		49.722	99.595	24.966	2.00304
				SEM	0.0460719				SEM	0.0517114		10	51.361	32.3	25.362	0.628882		78.044	90.318	31.306	1.15727
												11	51.361	40.931	25.362	0.796928		42.069	104.944	22.984	2.49457
												12	48.115	41.332	24.569	0.859025		42.069	123.607	22.984	2.9382
												13	48.115	26.754	24.569	0.556043
												14	48.115	73.24	24.569	1.52219				Average	1.53033
												15	64.599	35.242	28.532	0.54555
												16	46.667	52.652	24.173	1.12825				TOTAL	1.51918
												17	46.667	42.678	24.173	0.914522				SEM	0.111595
												18	46.667	104.346	24.173	2.23597
												19	46.667	50.716	24.173	1.08676
												20	66.079	57.279	38.624	0.866826
												21	63.151	29.987	28.136	0.474846
												22	63.151	49.5	28.136	0.783836
												23	63.151	90.175	28.136	1.42793
												24	63.151	62.519	28.136	0.989992
												25	63.151	74.962	28.136	1.18703
												26	63.151	64.18	28.136	1.01629
												27	63.151	95.801	28.136	1.51701
												28	63.151	55.58	28.136	0.880113
															Average	1.06974
															TOTAL	1.25138
															SEM	0.0687815
													Cav1KO Control	Cav1KO Magnetized
		Cav1WT Control	Cav1WT Magnetized									Average	1.25138	1.51918
	Average	0.501285	0.468912									SEM	0.0687815	0.111595
	SEM	0.0460719	0.0517114

## Sheet: Poolpanel 5M 5V 5W Figure 7E 7F
	Cav1WT	Area	Mean Fluorescence Intensity	Perimeter	Mean Int/Area %			Cav1KO	Area	Mean Fluorescence Intensity	Perimeter	Mean Int/Area %
Control	1	1755.71	12.9548	254.264	0.737864	0.31429	Control	1	350.016	10.2481	117.656	2.9279	0.962191
	2	510.152	6.91728	125.247	1.35592	0.57755		2	644.839	20.4801	122.446	3.17599	1.04372
	3	631.614	7.91485	158.842	1.25312	0.533759		3	672.456	8.24606	116.324	1.22626	0.402984
	4	476.042	11.8816	93.5631	2.49591	1.06312		4	525.427	9.59094	99.3886	1.82536	0.599864
	5	698.446	9.28551	129.155	1.32945	0.566275		5	545.583	9.6943	118.093	1.77687	0.58393
	6	745.364	8.46953	140.397	1.13629	0.484		6	855.665	21.3682	180.742	2.49726	0.820669
	7	860.77	6.61612	190.679	0.768629	0.327394		7	1142.18	6.89181	151.776	0.603392	0.198292
	8	537.402	9.23097	181.756	1.7177	0.731647		8	692.188	13.0102	144.91	1.87957	0.61768
	9	419.955	12.7231	95.3427	3.02964	1.29046		9	695.55	8.78423	126.345	1.26292	0.41503
	10	687.554	6.97784	113.976	1.01488	0.432283		10	985.21	8.92029	166.645	0.90542	0.297546
	11	362.836	14.0166	95.0845	3.86308	1.64546		11	576.204	38.4245	129.517	6.66855	2.19147
	12	344.416	11.6174	96.7494	3.37307	1.43674		12	804.759	11.3756	135.161	1.41354	0.46453
	13	537.716	10.2383	99.4497	1.90403	0.811015		13	604.576	12.2893	128.586	2.03271	0.668005
	14	821.174	14.0792	134.213	1.71452	0.730294		14	674.822	10.6597	130.8	1.57963	0.51911
	15	512.34	9.87461	115.262	1.92736	0.820949		15	677.333	15.5709	108.119	2.29886	0.75547
	16	698.226	12.9371	176.834	1.85285	0.789214		16	595.243	11.2353	110.567	1.88751	0.620288
	17	1032.35	13.7716	155.846	1.33401	0.568216		17	816.396	10.4071	147.614	1.27476	0.418922
	18	652.7	23.3895	121.136	3.5835	1.52637		18	445.109	12.9871	111.107	2.91772	0.958846
	19	717.574	7.46639	137.518	1.0405	0.443198		19	395.127	13.3529	103.549	3.37941	1.11057
	20	598.614	10.6388	120.042	1.77724	0.757007		20	639.581	12.7297	112.648	1.99033	0.654077
	21	581.945	11.3731	115.267	1.95433	0.832437		21	373.838	36.2045	85.759	9.68454	3.18261
	22	766.568	10.7172	141.278	1.39808	0.595507		22	871.346	17.5704	150.37	2.01646	0.662667
	23	386.864	12.3135	89.447	3.1829	1.35574		23	192.219	37.7154	51.392	19.6211	6.44803
	24	241.845	19.2035	88.7477	7.9404	3.38218		24	2007.96	17.7593	219.92	0.884447	0.290654
	25	542.209	9.77325	120.017	1.80249	0.767762		25	724.559	24.4575	116.592	3.3755	1.10928
	26	342.4	7.18298	73.6909	2.09783	0.893562		26	855.175	7.47022	123.012	0.873531	0.287067
	27	237.517	23.8025	66.7939	10.0214	4.26855		27	273.304	12.8616	79.7835	4.70596	1.54651
	28	501.254	6.69363	99.0295	1.33538	0.568798		28	636.961	7.27042	98.4828	1.14142	0.375104
	29	520.354	7.40955	109.529	1.42394	0.606523		29	302.408	12.2152	80.0679	4.0393	1.32743
	30	380.307	7.85426	97.4581	2.06524	0.879682		30	527.769	7.50716	133.434	1.42243	0.467452
				Average	2.34772	1					Average	3.04295	1
				SEM	0.364554	0.15528					SEM	0.666476	0.219023
	Cav1WT	Area	Mean Fluorescence Intensity	Perimeter	Mean Int/Area %			Cav1KO	Area	Mean Fluorescence Intensity	Perimeter	Mean Int/Area %
1/10 Hypoosmotic 10min	1	383.035	15.561	113.478	4.06254	1.73042	1/10 Hypoosmotic 10min	1	190.182	56.889	53.9341	29.9129	9.83021
	2	493.379	9.43113	132.215	1.91154	0.814211		2	235.389	52.3071	57.1068	22.2215	7.30262
	3	645.352	17.474	164.089	2.70767	1.15332		3	833.483	16.1321	167.698	1.9355	0.636059
	4	407.273	21.1743	79.8649	5.19904	2.21451		4	915.528	21.0148	195.466	2.29537	0.754323
	5	358.712	16.5924	93.2401	4.62554	1.97023		5	390.905	23.6514	112.399	6.05043	1.98834
	6	493.219	10.601	114.174	2.14935	0.915507		6	776.952	21.6874	167.427	2.79135	0.917315
	7	602.654	11.2631	122.914	1.86892	0.796057		7	273.163	27.3764	73.0384	10.022	3.29351
	8	407.58	16.7758	101.07	4.11594	1.75317		8	737.626	76.9389	117.032	10.4306	3.42779
	9	658.523	13.1161	109.243	1.99174	0.848374		9	382.848	54.0107	127.712	14.1076	4.63616
	10	687.263	12.6136	185.638	1.83534	0.781754		10	265.437	92.7463	94.5311	34.941	11.4826
	11	509.132	8.49806	121.39	1.66913	0.710957		11	283.278	27.1307	65.4555	9.57742	3.14741
	12	377.172	13.6776	91.2631	3.62637	1.54463		12	538.785	27.2507	172.891	5.0578	1.66213
	13	523.264	9.74378	112.753	1.86211	0.79316		13	510.143	6.6607	109.332	1.30565	0.429075
	14	278.393	15.4463	77.5395	5.54838	2.36331		14	740.459	36.7239	238.444	4.95961	1.62987
	15	1181.9	6.81664	175.794	0.576755	0.245666		15	571.341	51.1479	122.405	8.95226	2.94196
	16	1028.84	9.01269	191.822	0.876003	0.37313		16	683.494	37.8088	132.252	5.5317	1.81787
	17	438.617	9.27203	116.544	2.11392	0.900417		17	112.793	45.2049	40.9292
	18	373.65	33.1309	80.4434	8.86682	3.77678		18	241.901	69.3797	81.8613	28.6811	9.42541
	19	373.65	33.1309	80.4434	8.86682	3.77678		19	256.082	48.9092	66.0125	19.0991	6.27649
	20	416.888	9.86311	127.203	2.36589	1.00774		20	182.522	107.974	56.9192
	21	427.722	29.9295	88.0575	6.99741	2.98052		21	226.175	26.5431	60.6603	11.7356	3.85666
	22	433.641	9.55717	114.146	2.20394	0.938757		22	447.542	15.9221	94.4951	3.55768	1.16915
	23	497.377	7.54763	142.235	1.51749	0.646367		23	416.786	17.7004	82.0856	4.24689	1.39565
	24	194.627	21.6564	56.1128				24	185.838	41.0174	64.8479	22.0716	7.25334
	25	372.398	13.718	91.1185	3.6837	1.56906		25	264.345	23.2988	77.335	8.81381	2.89647
	26	442.119	5.00132	109.658	1.13122	0.481837		26	379.486	23.8007	99.1116	6.27183	2.0611
	27	268.785	35.3459	63.5164				27	236.14	48.5923	63.2502	20.5778	6.76243
	28	1146.32	9.87535	134.851	0.861482	0.366944		28	326.59	44.1886	82.3972	13.5303	4.44644
	29	407.707	6.21328	95.119	1.52396	0.649123		29	191.452	109.619	55.3697
	30	508.428	9.25533	86.0232	1.82038	0.775383		30	310.262	17.7351	86.6664	5.71616	1.87849
				Average	3.09212	1.31708					Average	11.6442	3.82662
				SEM	0.424977	0.181017					SEM	1.79575	0.590134
	Cav1WT	Area	Mean Fluorescence Intensity	Perimeter	Mean Int/Area %			Cav1KO	Area	Mean Fluorescence Intensity	Perimeter	Mean Int/Area %
1/10 Hypoosmotic 20min	1	489.095	9.67458	156.562	1.97806	0.842545	1/10 Hypoosmotic 20min	1	429.348	24.3819	138.054	5.67882	1.86622
	2	347.246	7.94884	156.348	2.28911	0.975035		2	662.308	13.0524	149.112	1.97075	0.647642
	3	332.362	12.8567	93.8471	3.86828	1.64768		3	174.153	20.0306	50.9039	11.5017	3.77979
	4	365.123	9.73843	127.021	2.66716	1.13607		4	363.303	22.3262	111.489	6.14535	2.01953
	5	674.793	11.9927	125.412	1.77724	0.757009		5	520.891	18.2393	90.2612	3.50156	1.15071
	6	827.66	9.11981	233.166	1.10188	0.469341		6	236.294	17.4757	73.4832	7.39576	2.43045
	7	554.813	9.5137	139.122	1.71476	0.730394		7	239.79	19.9142	69.2778	8.30488	2.72921
	8	888.059	7.99693	225.594	0.900496	0.383562		8	536.452	11.9362	108.598	2.22503	0.731209
	9	668.533	6.531	185.819	0.976915	0.416112		9	150.434	28.4678	48.0275	18.9239	6.21891
	10	401.246	9.33847	139.814	2.32737	0.991333		10	244.744	22.934	75.8946	9.3706	3.07944
	11	397.065	10.7472	100.578	2.70667	1.1529		11	955.935	17.4792	180.054	1.82849	0.600894
	12	388.267	12.6323	101.327	3.2535	1.38582		12	379.536	26.4153	119.089	6.95988	2.28721
	13	473.883	9.43632	101.332	1.99127	0.848175		13	676.846	16.8535	107.06	2.49001	0.818287
	14	524.286	7.4475	149.547	1.4205	0.605057		14	389.878	24.3226	109.705	6.23852	2.05015
	15	399.144	7.56644	148.482	1.89567	0.807452		15	330.808	16.9914	73.2377	5.13633	1.68794
	16	352.652	11.3624	85.5766	3.22199	1.37239		16	534.969	15.2595	105.499	2.85241	0.937383
	17	839.203	8.62306	115.681	1.02753	0.437672		17	191.202	27.0742	53.4016	14.16	4.65337
	18	570.362	13.7661	116.628	2.41358	1.02805		18	448.196	19.672	129.258	4.38916	1.4424
	19	769.97	11.5501	121.276	1.50007	0.63895		19	282.878	25.1113	69.2391	8.87707	2.91726
	20	743.803	9.54003	148.775	1.2826	0.546319		20	1012.38	15.5317	153.832	1.53418	0.504174
	21	451.669	4.88834	109.255	1.08228	0.460993		21	573.324	12.9516	95.488	2.25904	0.742383
	22	852.099	6.92121	156.289	0.812254	0.345976		22	736.207	12.6877	111.456	1.72339	0.566355
	23	505.287	8.34239	141.138	1.65102	0.703244		23	369.616	12.664	110.724	3.42625	1.12596
	24	358.203	7.44577	132.43	2.07864	0.885389		24	317.145	19.0535	90.5452	6.00783	1.97434
	25	653.67	8.43082	190.955	1.28977	0.549371		25	697.919	14.5174	137.865	2.08009	0.683577
	26	540.009	5.4526	124.824	1.00972	0.430088		26	537.461	11.8438	107.244	2.20367	0.724187
	27	487.935	8.93958	116.868	1.83212	0.780385		27	2055.37	19.8534	226.761	0.965929	0.317431
	28	327.468	10.2387	66.7915	3.12662	1.33177		28	284.753	25.4223	75.6332	8.92785	2.93394
	29	357.775	6.96876	70.2648	1.94781	0.829659		29	530.482	13.687	120.763	2.58011	0.847896
	30	331.176	9.78508	89.0861	2.95465	1.25852		30	456.636	11.8562	93.7788	2.59643	0.853259
				Average	1.93665	0.824908					Average	5.4085	1.77738
				SEM	0.148049	0.063061					SEM	0.763317	0.250847
	Cav1WT	Area	Mean Fluorescence Intensity	Perimeter	Mean Int/Area %			Cav1KO	Area	Mean Fluorescence Intensity	Perimeter	Mean Int/Area %
1/20 Hypoosmotic 10min	1	582.307	11.4193	97.8521	1.96104	0.835296	1/20 Hypoosmotic 10min	1	875.05	48.4862	136.512	5.54096	1.82092
	2	608.834	7.49475	116.46	1.231	0.52434		2	314.277	34.7215	77.2803	11.0481	3.63071
	3	244.775	12.2611	72.9983	5.00911	2.13361		3	195.301	44.106	52.1097	22.5836	7.42161
	4	238.178	23.2542	66.0962	9.76334	4.15865		4	1217.71	13.2023	133.795
	5	388.964	16.7413	103.999	4.30407	1.8333		5	746.008	30.5762	181.416	4.09863	1.34693
	6	362.415	18.9846	114.223	5.23838	2.23126		6	292.103	23.4699	65.7333	8.03481	2.64046
	7	826.704	8.69574	146.752	1.05186	0.448034		7	285.222	39.3044	67.4775	13.7803	4.5286
	8	681.335	16.0659	123.196	2.35801	1.00438		8	453.199	20.8156	145.887	4.59304	1.5094
	9	933.088	12.65	228.31	1.35571	0.57746		9	278.29	24.8173	76.3321	8.9178	2.93064
	10	807.945	9.59631	135.658	1.18774	0.505914		10	347.835	19.6958	87.1699	5.66239	1.86082
	11	574.754	7.73023	110.019	1.34496	0.572881		11	490.939	17.8253	95.1668	3.63087	1.1932
	12	404.929	13.107	94.3555	3.23687	1.37873		12	475.933	21.1621	81.7889	4.44645	1.46123
	13	428.814	10.3982	101.297	2.42487	1.03286		13	254.443	30.9536	67.1828	12.1653	3.99785
	14	638.327	12.0864	118.17	1.89345	0.806506		14	488.891	19.0805	102.709	3.90281	1.28257
	15	727.638	7.71077	122.252	1.0597	0.451374		15	365.301	25.9621	111.142	7.10706	2.33558
	16	371.183	10.4112	75.3362	2.80488	1.19473		16	870.352	16.0521	123.241	1.84433	0.606097
	17	348.531	15.9892	72.3588	4.5876	1.95407		17	301.454	47.1346	71.5119	15.6358	5.13835
	18	188.47	17.5208	53.2329	9.29635	3.95974		18	307.171	40.6757	67.6849	13.242	4.35171
	19	465.526	17.6215	96.9471	3.78529	1.61233		19	242.02	50.0772	76.0598	20.6914	6.79976
	20	278.295	20.2466	61.9774	7.2752	3.09884		20	345.149	105.598	74.8906	30.595	10.0544
	21	318.621	20.5854	80.4686	6.46078	2.75194		21	195.836	40.491	56.2095	20.6759	6.79469
	22	209.043	11.9146	57.6768	5.69959	2.42771		22	248.914	27.8205	62.3717	11.1768	3.673
	23	235.858	10.9035	59.7915	4.62289	1.9691		23	263.942	15.4805	80.7836	5.86511	1.92744
	24	515.938	7.80636	101.152	1.51304	0.644474		24	581.09	12.2968	94.7466	2.11616	0.69543
	25	190.335	11.5947	52.9376	6.09174	2.59475		25	665.51	12.1095	105.737	1.81957	0.597963
	26	151.37	21.3593	48.5675	14.1107	6.01038		26	307.823	16.4751	71.1051	5.35213	1.75886
	27	177.676	21.6195	50.5915	12.1679	5.18287		27	442.42	29.7832	91.4708	6.73187	2.21228
	28	490.167	8.6536	114.323	1.76544	0.75198		28	388.299	31.4661	77.4872	8.10358	2.66306
	29	188.322	13.6431	55.1064	7.24455	3.08578		29	312.23	26.8066	83.4804	8.58553	2.82145
	30	213.692	12.007	62.588	5.61884	2.39332		30	372.619	19.9516	100.777	5.35441	1.75961
	31	378.426	9.25378	113.703	2.44534	1.04158
				Average	4.48097	1.90865					Average	9.4242	3.09705
				SEM	0.60463	0.25754					SEM	1.29502	0.425581
	Cav1WT	Area	Mean Fluorescence Intensity	Perimeter	Mean Int/Area %			Cav1KO	Area	Mean Fluorescence Intensity	Perimeter	Mean Int/Area %
1/20 Hypoosmotic 20min	1	454.975	23.5848	190.29	5.18375	2.208	1/20 Hypoosmotic 20min	1	308.721	17.2941	76.7485	5.60187	1.84093
	2	348.946	14.542	88.9143	4.1674	1.77508		2	112.973	24.3753	41.2555	21.5762	7.09054
	3	154.868	16.8446	49.4195	10.8768	4.6329		3	286.126	14.0469	71.3543	4.90935	1.61335
	4	204.659	12.2095	63.1854	5.96579	2.5411		4	540.984	13.4033	150.835	2.47759	0.814204
	5	257.577	10.9858	119.913	4.26506	1.81668		5	369.719	25.427	110.329	6.87737	2.2601
	6	424.617	12.5511	87.5272	2.95585	1.25903		6	413.078	32.3199	104.235	7.82415	2.57124
	7	287.656	8.00497	89.1937	2.78283	1.18533		7	496.076	28.2352	122.656	5.6917	1.87045
	8	644.13	29.0726	104.36	4.51347	1.92249		8	536.816	24.1017	101.519	4.48976	1.47546
	9	915.164	20.214	190.933	2.20879	0.940822		9	493.518	29.2735	110.882	5.93159	1.94929
	10	185.747	30.6014	57.3321	16.4748	7.01737		10	556.106	21.7154	124.785	3.90491	1.28326
	11	651.951	13.8676	102.161	2.1271	0.906029		11	527.58	21.8962	97.9248	4.15031	1.36391
	12	348.622	25.4068	76.8181	7.28777	3.1042		12	678.993	18.4906	104.364	2.72324	0.894933
	13	365.426	16.7027	120.109	4.57074	1.94689		13	975.985	26.7018	139.976	2.73589	0.899088
	14	450.441	7.15195	121.143	1.58777	0.676302		14	608.915	35.5502	133.222	5.83828	1.91862
	15	319.019	31.5188	73.0101	9.87992	4.20831		15	874.181	25.8808	142.666	2.96057	0.972927
	16	209.415	29.5809	62.7114	14.1255	6.01668		16	619.274	19.3544	99.9942	3.12533	1.02707
	17	112.941	30.7152	47.8585	27.1958	11.5839		17	1267.55	21.7568	162.974	1.71645	0.564073
	18	685.688	14.2382	140.83	2.07649	0.884471		18	651.994	19.3475	104.334	2.96743	0.975181
	19	724.543	10.3451	137.678	1.42782	0.608172		19	837.007	18.6647	166.762	2.22993	0.732817
	20	441.687	11.8267	112.21	2.67762	1.14052		20	672.973	21.1322	149.813	3.14012	1.03193
	21	209.587	29.4939	76.7244	14.0724	5.99408		21	474.135	41.7701	86.7413	8.80974	2.89513
	22	242.323	14.1241	60.7818	5.82862	2.48267		22	325.164	96.2155	92.5997	29.5898	9.72404
	23	339.8	8.85716	101.948	2.60658	1.11026		23	615.021	34.7966	110.301	5.65779	1.85931
	24	841.461	18.9949	177.461	2.25737	0.961516		24	463.146	82.9146	119.854	17.9025	5.88325
	25	396.036	6.80068	99.3916	1.71719	0.731428		25	446.997	67.3916	88.9992	15.0765	4.95457
	26	150.15	37.1477	51.3547	24.7404	10.5381		26	276.966	88.5382	85.9029	31.9671	10.5053
	27	165.988	19.4083	52.532	11.6926	4.9804		27	410.989	67.5242	108.918	16.4297	5.39925
	28	197.018	20.3751	57.8975	10.3417	4.40502		28	281.798	74.9329	69.7995	26.591	8.73856
	29	189.618	24.7012	51.5453	13.0268	5.54872		29	327.063	82.7252	72.0063	25.2934	8.31211
	30	250.649	16.285	62.2645	6.49712	2.76742		30	893.206	67.3416	158.599	7.53931	2.47763
				Average	7.50439	3.19646					Average	9.5243	3.12995
				SEM	1.21572	0.517829					SEM	1.646	0.540922
	PTRFKO	Area	Mean Fluorescence Intensity	Perimeter	Mean Int/Area %			PTRFKO	Area	Mean Fluorescence Intensity	Perimeter	Mean Int/Area %
PTRFKO Control	1	554.12	27.0337	177.884	4.87867	0.837015	PTRFKO 1/10 Hypoosmotic 10min	1	211.474	24.2665	92.6314	11.4749	1.96871
	2	427.404	23.7862	102.111	5.56528	0.954815		2	236.788	34.2508	114.309	14.4648	2.48167
	3	578.98	20.7056	151.563	3.57622	0.613559		3	159.089	16.1232	64.9488	10.1347	1.73877
	4	532.184	77.6577	132.425	14.5923	2.50354		4	156.051	53.5841	91.6701	34.3376	5.89117
	5	569.487	62.3066	150.767	10.9408	1.87708		5	173.707	35.2397	100.915	20.2868	3.48054
	6	611.298	22.6519	159.406	3.70554	0.635745		6	291.834	27.0654	144.373	9.27423	1.59115
	7	795.908	19.966	179.027	2.50859	0.430389		7	117.317	61.9083	52.0916	52.7701	9.05357
	8	675.181	18.2403	187.742	2.70154	0.463493		8	163.321	29.8871	64.4122	18.2996	3.13959
	9	674.071	21.0036	193.487	3.11593	0.534589		9	217.606	20.1167	94.3102	9.24455	1.58605
	10	840.646	18.9283	180.24	2.25164	0.386305		10	403.058	26.6022	77.514	6.6001	1.13236
	11	460.387	37.3159	85.8728	8.10533	1.3906		11	176.905	94.7055	73.0693	53.5347	9.18475
	12	605.99	31.804	92.3161	5.24827	0.900426		12	267.947	68.6383	99.0701	25.6163	4.3949
	13	736.266	19.0329	157.692	2.58505	0.443508		13	220.048	106.488	67.8109	48.3928	8.30258
	14	422.167	26.5861	140.146	6.29754	1.08045		14	431.221	51.5961	107.641	11.9651	2.05281
	15	650.086	33.1414	135.755	5.09801	0.874647		15	492.058	38.584	98.0569	7.84135	1.34531
	16	494.184	20.8772	117.41	4.22457	0.724795		16	371.664	54.3646	91.9828	14.6274	2.50957
	17	397.171	28.6746	129.597	7.2197	1.23866		17	337.973	44.5754	105.376	13.189	2.2628
	18	803.253	13.8248	148.902	1.7211	0.295284		18	442.591	93.6548	113.522	21.1606	3.63045
	19	501.295	28.1884	147.301	5.62311	0.964736		19	359.368	53.6812	129.71	14.9377	2.5628
	20	488.325	45.339	112.41	9.2846	1.59292		20	276.241	52.1465	90.3996	18.8772	3.23869
	21	448.733	27.5754	122.445	6.14515	1.0543		21	597.799	34.7444	138.027	5.81205	0.997153
	22	597.51	38.2235	99.3256	6.39713	1.09753		22	250.589	37.6194	90.7471	15.0124	2.57562
	23	478.139	41.6724	94.834	8.71552	1.49529		23	363.017	43.0809	101.987	11.8675	2.03606
	24	501.886	11.072	102.697	2.20609	0.37849		24	245.976	52.4432	69.015	21.3205	3.65788
	25	280.765	34.3484	71.7668	12.2339	2.09892		25	566.903	34.1728	116.281	6.02797	1.0342
	26	617.68	14.438	112.986	2.33745	0.401029		26	272.463	42.9963	78.7572	15.7806	2.70742
	27	664.645	14.2539	133.248	2.14458	0.367938		27	344.517	36.9589	76.2997	10.7277	1.84052
	28	480.012	33.1594	136.412	6.90803	1.18519		28	183.173	36.4695	84.4751	19.9098	3.41586
	29	248.056	34.0236	65.3261	13.7161	2.35322		29	558.498	21.8396	94.3983	3.91041	0.670895
	30	604.592	29.0914	124.475	4.81175	0.825534		30	391.851	42.4057	102.215	10.8219	1.85668
				Average	5.82865	1					Average	17.9407	3.07802
				SEM	0.641195	0.110007					SEM	2.39262	0.410494
