# Supplementary material for: Caveolae couple mechanical stress to integrin recycling and activation
Source: eLife. 2022 Oct 20;11:e82348. doi: 10.7554/eLife.82348 (PMC9747151; doi:10.7554/eLife.82348)
Supplement: Figure 7—figure supplement 2—source data 1. [file elife-82348-fig7-figsupp2-data1.xlsx]

## Sheet: 9EG7 Ab 4ºC panel 6I & 6J
	Cav1WT	Label	Area	Mean	Perimeter	MinThr	MaxThr	Mean Int/Area %			Cav1KO	Label	Area	Mean	Perimeter	MinThr	MaxThr	Mean Int/Area %
Control	1	Control 9EG7-488 primary Ab before fixation WT vs KO eLife 2022.lif - Cav1WT MEF 9EG7-488 Control 2_serie_2_MAX-projection.tif:0559-0464	2644.77	20.931	403.154	0	255	0.79141	0.897828	Control	1	Control 9EG7-488 primary Ab before fixation WT vs KO eLife 2022.lif - Cav1KO MEF 9EG7-488 Control 2_serie_27_MAX-projection.tif:0478-0497	2488.21	8.775	475.426	0	255	0.352664	0.431924
	2	Control 9EG7-488 primary Ab before fixation WT vs KO eLife 2022.lif - Cav1WT MEF 9EG7-488 Control 3_serie_3_MAX-projection.tif:0514-0462	3242.32	28.186	462.755	0	255	0.869315	0.986208		2	Control 9EG7-488 primary Ab before fixation WT vs KO eLife 2022.lif - Cav1KO MEF 9EG7-488 Control 3_serie_28_MAX-projection.tif:0519-0513	2285.36	9.191	231.894	0	255	0.402168	0.492555
	3	Control 9EG7-488 primary Ab before fixation WT vs KO eLife 2022.lif - Cav1WT MEF 9EG7-488 Control 4_serie_4_MAX-projection.tif:0494-0553	2816.56	15.419	446.622	0	255	0.547442	0.621053		3	Control 9EG7-488 primary Ab before fixation WT vs KO eLife 2022.lif - Cav1KO MEF 9EG7-488 Control 4_serie_29_MAX-projection.tif:0500-0511	5226.51	8.499	612.162	0	255	0.162613	0.19916
	4	Control 9EG7-488 primary Ab before fixation WT vs KO eLife 2022.lif - Cav1WT MEF 9EG7-488 Control 5_serie_5_MAX-projection.tif:0484-0581	1811.82	9.98	317.064	0	255	0.550827	0.624894		4	Control 9EG7-488 primary Ab before fixation WT vs KO eLife 2022.lif - Cav1KO MEF 9EG7-488 Control 5_serie_30_MAX-projection.tif:0454-0540	3080.78	19.477	667.514	0	255	0.63221	0.774298
	5	Control 9EG7-488 primary Ab before fixation WT vs KO eLife 2022.lif - Cav1WT MEF 9EG7-488 Control 6_serie_6_MAX-projection.tif:0453-0536	2284.93	9.282	384.581	0	255	0.406227	0.460851		5	Control 9EG7-488 primary Ab before fixation WT vs KO eLife 2022.lif - Cav1KO MEF 9EG7-488 Control 6_serie_31_MAX-projection.tif:0496-0506	2694.29	7.796	349.025	0	255	0.289352	0.354383
	6	Control 9EG7-488 primary Ab before fixation WT vs KO eLife 2022.lif - Cav1WT MEF 9EG7-488 Control 8_serie_8_MAX-projection.tif:0530-0500	2884.61	19.657	495.284	0	255	0.681444	0.773075		6	Control 9EG7-488 primary Ab before fixation WT vs KO eLife 2022.lif - Cav1KO MEF 9EG7-488 Control 7_serie_32_MAX-projection.tif:0485-0571	1924.59	12.362	437.633	0	255	0.642319	0.786678
	7	Control 9EG7-488 primary Ab before fixation WT vs KO eLife 2022.lif - Cav1WT MEF 9EG7-488 Control 9_serie_9_MAX-projection.tif:0522-0536	4114.13	27.765	555.676	0	255	0.674869	0.765615		7	Control 9EG7-488 primary Ab before fixation WT vs KO eLife 2022.lif - Cav1KO MEF 9EG7-488 Control 8_serie_33_MAX-projection.tif:0419-0548	3767.96	12.335	445.027	0	255	0.327365	0.40094
	8	Control 9EG7-488 primary Ab before fixation WT vs KO eLife 2022.lif - Cav1WT MEF 9EG7-488 Control 11_serie_11_MAX-projection.tif:0500-0498	3111.06	30.163	497.973	0	255	0.969542	1.09991		8	Control 9EG7-488 primary Ab before fixation WT vs KO eLife 2022.lif - Cav1KO MEF 9EG7-488 Control 9_serie_34_MAX-projection.tif:0507-0564	4157.48	8.54	444.493	0	255	0.205413	0.251579
	9	Control 9EG7-488 primary Ab before fixation WT vs KO eLife 2022.lif - Cav1WT MEF 9EG7-488 Control 12_serie_12_MAX-projection.tif:0557-0507	2358.57	26.223	460.457	0	255	1.11182	1.26132		9	Control 9EG7-488 primary Ab before fixation WT vs KO eLife 2022.lif - Cav1KO MEF 9EG7-488 Control 10_serie_35_MAX-projection.tif:0509-0526	1915.44	13.716	356.266	0	255	0.716077	0.877013
	10	Control 9EG7-488 primary Ab before fixation WT vs KO eLife 2022.lif - Cav1WT MEF 9EG7-488 Control 13_serie_13_MAX-projection.tif:0611-0576	1884.56	13.845	266.004	0	255	0.734653	0.833438		10	Control 9EG7-488 primary Ab before fixation WT vs KO eLife 2022.lif - Cav1KO MEF 9EG7-488 Control 11_serie_36_MAX-projection.tif:0503-0577	4517.16	11.058	825.846	0	255	0.2448	0.299818
	11	Control 9EG7-488 primary Ab before fixation WT vs KO eLife 2022.lif - Cav1WT MEF 9EG7-488 Control 14_serie_14_MAX-projection.tif:0528-0576	1701.85	22.729	371.228	0	255	1.33555	1.51513		11	Control 9EG7-488 primary Ab before fixation WT vs KO eLife 2022.lif - Cav1KO MEF 9EG7-488 Control 12_serie_37_MAX-projection.tif:0537-0473	3127.62	13.345	460.028	0	255	0.426682	0.522577
	12	Control 9EG7-488 primary Ab before fixation WT vs KO eLife 2022.lif - Cav1WT MEF 9EG7-488 Control 15_serie_15_MAX-projection.tif:0460-0537	1806.63	14.758	300.754	0	255	0.81688	0.926722		12	Control 9EG7-488 primary Ab before fixation WT vs KO eLife 2022.lif - Cav1KO MEF 9EG7-488 Control 13_serie_38_MAX-projection.tif:0470-0515	2136.47	10.513	411.478	0	255	0.492074	0.602667
	13	Control 9EG7-488 primary Ab before fixation WT vs KO eLife 2022.lif - Cav1WT MEF 9EG7-488 Control 16_serie_16_MAX-projection.tif:0511-0508	2089.27	14.046	349.724	0	255	0.672292	0.762692		13	Control 9EG7-488 primary Ab before fixation WT vs KO eLife 2022.lif - Cav1KO MEF 9EG7-488 Control 14_serie_39_MAX-projection.tif:0565-0550	2020.94	11.3	258.579	0	255	0.559146	0.684812
	14	Control 9EG7-488 primary Ab before fixation WT vs KO eLife 2022.lif - Cav1WT MEF 9EG7-488 Control 17_serie_17_MAX-projection.tif:0549-0528	2092.3	14.682	368.266	0	255	0.701716	0.796073		14	Control 9EG7-488 primary Ab before fixation WT vs KO eLife 2022.lif - Cav1KO MEF 9EG7-488 Control 15_serie_40_MAX-projection.tif:0514-0434	2619.37	9.806	311.604	0	255	0.374365	0.458503
	15	Control 9EG7-488 primary Ab before fixation WT vs KO eLife 2022.lif - Cav1WT MEF 9EG7-488 Control 18_serie_18_MAX-projection.tif:0499-0556	2124.76	15.383	315.526	0	255	0.723988	0.821339		15	Control 9EG7-488 primary Ab before fixation WT vs KO eLife 2022.lif - Cav1KO MEF 9EG7-488 Control 16_serie_41_MAX-projection.tif:0420-0570	2601.52	23.733	405.79	0	255	0.912275	1.11731
	16	Control 9EG7-488 primary Ab before fixation WT vs KO eLife 2022.lif - Cav1WT MEF 9EG7-488 Control 19_serie_19_MAX-projection.tif:0487-0559	1713.56	14.244	270.074	0	255	0.831254	0.943029		16	Control 9EG7-488 primary Ab before fixation WT vs KO eLife 2022.lif - Cav1KO MEF 9EG7-488 Control 17_serie_42_MAX-projection.tif:0461-0589	2216.3	23.81	394.471	0	255	1.07431	1.31576
	17	Control 9EG7-488 primary Ab before fixation WT vs KO eLife 2022.lif - Cav1WT MEF 9EG7-488 Control 21_serie_21_MAX-projection.tif:0467-0537	2127.32	20.876	308.691	0	255	0.981329	1.11328		17	Control 9EG7-488 primary Ab before fixation WT vs KO eLife 2022.lif - Cav1KO MEF 9EG7-488 Control 18_serie_43_MAX-projection.tif:0414-0803	1992.61	25.151	412.523	0	255	1.26221	1.54589
	18	Control 9EG7-488 primary Ab before fixation WT vs KO eLife 2022.lif - Cav1WT MEF 9EG7-488 Control 22_serie_22_MAX-projection.tif:0536-0575	4407.11	18.596	505.222	0	255	0.421955	0.478693		18	Control 9EG7-488 primary Ab before fixation WT vs KO eLife 2022.lif - Cav1KO MEF 9EG7-488 Control 19_serie_44_MAX-projection.tif	1446.23	20.125	292.962	0	255	1.39155	1.7043
	19	Control 9EG7-488 primary Ab before fixation WT vs KO eLife 2022.lif - Cav1WT MEF 9EG7-488 Control 23_serie_23_MAX-projection.tif:0515-0529	2876.02	17.277	418.662	0	255	0.600726	0.681503		19	Control 9EG7-488 primary Ab before fixation WT vs KO eLife 2022.lif - Cav1KO MEF 9EG7-488 Control 20_serie_45_MAX-projection.tif:0517-0498	2928.21	29.257	490.83	0	255	0.999144	1.2237
	20	Control 9EG7-488 primary Ab before fixation WT vs KO eLife 2022.lif - Cav1WT MEF 9EG7-488 Control 24_serie_24_MAX-projection.tif:0458-0515	3440.17	15.074	487.093	0	255	0.438177	0.497096		20	Control 9EG7-488 primary Ab before fixation WT vs KO eLife 2022.lif - Cav1KO MEF 9EG7-488 Control 21_serie_46_MAX-projection.tif:0536-0509	3601.92	30.939	606.784	0	255	0.858959	1.05201
	21	Control 9EG7-488 primary Ab before fixation WT vs KO eLife 2022.lif - Cav1WT MEF 9EG7-488 Control 25_serie_25_MAX-projection.tif:0497-0477	2189.87	26.756	316.166	0	255	1.22181	1.3861		21	Control 9EG7-488 primary Ab before fixation WT vs KO eLife 2022.lif - Cav1KO MEF 9EG7-488 Control 22_serie_47_MAX-projection.tif:0425-0507	2139.28	18.95	459.69	0	255	0.885812	1.0849
	22	Control 9EG7-488 primary Ab before fixation WT vs KO eLife 2022.lif - Cav1WT MEF 9EG7-488 Control_serie_1_MAX-projection.tif:0538-0512	2201.9	16.505	384.154	0	255	0.749581	0.850373		22	Control 9EG7-488 primary Ab before fixation WT vs KO eLife 2022.lif - Cav1KO MEF 9EG7-488 Control 23_serie_48_MAX-projection.tif:0480-0544	2335.79	18.615	279.291	0	255	0.796947	0.976058
	23	Control 9EG7-488 primary Ab before fixation WT vs KO eLife 2022 SECOND.lif - Cav1WT MEF 9EG7-488 Control 4_serie_4_MAX-projection.tif:0456-0518	2165.97	13.349	315.919	0	255	0.616305	0.699176		23	Control 9EG7-488 primary Ab before fixation WT vs KO eLife 2022.lif - Cav1KO MEF 9EG7-488 Control 24_serie_49_MAX-projection.tif:0470-0524	3768.52	25.533	363.873	0	255	0.677534	0.829808
	24	Control 9EG7-488 primary Ab before fixation WT vs KO eLife 2022 SECOND.lif - Cav1WT MEF 9EG7-488 Control 5_serie_5_MAX-projection.tif:0516-0499	1770.64	9.533	263.774	0	255	0.538392	0.610787		24	Control 9EG7-488 primary Ab before fixation WT vs KO eLife 2022.lif - Cav1KO MEF 9EG7-488 Control 25_serie_50_MAX-projection.tif:0438-0492	3661.01	17.907	469.18	0	255	0.489128	0.599058
	25	Control 9EG7-488 primary Ab before fixation WT vs KO eLife 2022 SECOND.lif - Cav1WT MEF 9EG7-488 Control 7_serie_7_MAX-projection.tif:0432-0497	1174.47	27.731	222.479	0	255	2.36115	2.67864		25	Control 9EG7-488 primary Ab before fixation WT vs KO eLife 2022.lif - Cav1KO MEF 9EG7-488 Control_serie_26_MAX-projection.tif:0480-0517	2995.2	10.859	580.513	0	255	0.362546	0.444027
	26	Control 9EG7-488 primary Ab before fixation WT vs KO eLife 2022 SECOND.lif - Cav1WT MEF 9EG7-488 Control 8_serie_8_MAX-projection.tif:0554-0538	1722.59	18.883	221.441	0	255	1.0962	1.2436		26	Control 9EG7-488 primary Ab before fixation WT vs KO eLife 2022 SECOND.lif - Cav1KO MEF 9EG7-488 Control 2_serie_17_MAX-projection.tif:0549-0541	3367.49	20.138	500.618	0	255	0.598013	0.732415
	27	Control 9EG7-488 primary Ab before fixation WT vs KO eLife 2022 SECOND.lif - Cav1WT MEF 9EG7-488 Control 9_serie_9_MAX-projection.tif:0510-0485	2660.56	18.704	344.857	0	255	0.70301	0.79754		27	Control 9EG7-488 primary Ab before fixation WT vs KO eLife 2022 SECOND.lif - Cav1KO MEF 9EG7-488 Control 3_serie_18_MAX-projection.tif:0402-0400	987.072	25.783	163.476	0	255	2.61207	3.19912
	28	Control 9EG7-488 primary Ab before fixation WT vs KO eLife 2022 SECOND.lif - Cav1WT MEF 9EG7-488 Control 10_serie_10_MAX-projection.tif:0541-0528	1206.92	29.574	236.493	0	255	2.45037	2.77985		28	Control 9EG7-488 primary Ab before fixation WT vs KO eLife 2022 SECOND.lif - Cav1KO MEF 9EG7-488 Control 4_serie_19_MAX-projection.tif:0352-0665	1667.16	18.753	280.848	0	255	1.12485	1.37766
	29	Control 9EG7-488 primary Ab before fixation WT vs KO eLife 2022 SECOND.lif - Cav1WT MEF 9EG7-488 Control 11_serie_11_MAX-projection.tif:0533-0532	1758.19	21.267	198.557	0	255	1.20959	1.37224		29	Control 9EG7-488 primary Ab before fixation WT vs KO eLife 2022 SECOND.lif - Cav1KO MEF 9EG7-488 Control 5_serie_20_MAX-projection.tif:0532-0585	2062.75	18.689	253.957	0	255	0.906024	1.10965
	30	Control 9EG7-488 primary Ab before fixation WT vs KO eLife 2022 SECOND.lif - Cav1WT MEF 9EG7-488 Control 13_serie_13_MAX-projection.tif:0480-0538	2311.42	39.812	358.707	0	255	1.7224	1.95401		30	Control 9EG7-488 primary Ab before fixation WT vs KO eLife 2022 SECOND.lif - Cav1KO MEF 9EG7-488 Control 6_serie_21_MAX-projection.tif:0497-0579	1694.23	21.445	401.193	0	255	1.26577	1.55025
	31	Control 9EG7-488 primary Ab before fixation WT vs KO eLife 2022 SECOND.lif - Cav1WT MEF 9EG7-488 Control 14_serie_14_MAX-projection.tif:0566-0476	4180.2	26.725	616.349	0	255	0.639324	0.725291		31	Control 9EG7-488 primary Ab before fixation WT vs KO eLife 2022 SECOND.lif - Cav1KO MEF 9EG7-488 Control 7_serie_22_MAX-projection.tif:0543-0484	2006.87	21.545	263.857	0	255	1.07356	1.31484
	32	Control 9EG7-488 primary Ab before fixation WT vs KO eLife 2022 SECOND.lif - Cav1WT MEF 9EG7-488 Control 15_serie_15_MAX-projection.tif:0491-0598	3065.98	14.647	366.786	0	255	0.477726	0.541964		32	Control 9EG7-488 primary Ab before fixation WT vs KO eLife 2022 SECOND.lif - Cav1KO MEF 9EG7-488 Control 8_serie_23_MAX-projection.tif:0435-0518	1522.66	23.786	200.573	0	255	1.56214	1.91322
	33	Control 9EG7-488 primary Ab before fixation WT vs KO eLife 2022 SECOND.lif - Cav1WT MEF 9EG7-488 Control_serie_1_MAX-projection.tif:0422-0531	2841.84	12.542	377.753	0	255	0.441333	0.500677		33	Control 9EG7-488 primary Ab before fixation WT vs KO eLife 2022 SECOND.lif - Cav1KO MEF 9EG7-488 Control 9_serie_24_MAX-projection.tif:0542-0455	1891.58	28.364	408.832	0	255	1.49948	1.83649
											34	Control 9EG7-488 primary Ab before fixation WT vs KO eLife 2022 SECOND.lif - Cav1KO MEF 9EG7-488 Control 10_serie_25_MAX-projection.tif:0470-0742	2548.22	25.127	437.047	0	255	0.986059	1.20767
											35	Control 9EG7-488 primary Ab before fixation WT vs KO eLife 2022 SECOND.lif - Cav1KO MEF 9EG7-488 Control 13_serie_28_MAX-projection.tif:0491-0546	3885.9	53.173	428.231	0	255	1.36836	1.67589
											36	Control 9EG7-488 primary Ab before fixation WT vs KO eLife 2022 SECOND.lif - Cav1KO MEF 9EG7-488 Control 15_serie_30_MAX-projection.tif:0482-0529	2712.35	35.021	355.131	0	255	1.29117	1.58135
											37	Control 9EG7-488 primary Ab before fixation WT vs KO eLife 2022 SECOND.lif - Cav1KO MEF 9EG7-488 Control_serie_16_MAX-projection.tif:0504-0629	5571.47	21.459	460.135	0	255	0.385159	0.471722
			Average	19.5498				0.881473	1				Average	19.3209				0.816495	1
			SEM	1.23664				0.0854498	0.0969398				SEM	1.51344				0.0822584	0.100746
	Cav1WT	Label	Area	Mean	Perimeter	MinThr	MaxThr	Mean Int/Area %			Cav1KO	Label	Area	Mean	Perimeter	MinThr	MaxThr	Mean Int/Area %
Hypoosmotic 1-10 10min	1	Cav1WT MEF 9EG7-488 Hypoosmotic 1-10 10min_serie_26_MAX-projection (1).tif:0536-0530	2797.72	16	407.253	0	255	0.571894	0.648793	Hypoosmotic 1-10 10min	1	Cav1KO MEF 9EG7-488 Hypoosmotic 1-10 10min_serie_1_MAX-projection (1).tif:0569-0535	1730.27	64.002	316.178	0	255	3.69897	4.5303
	2	Cav1WT MEF 9EG7-488 Hypoosmotic 1-10 10min_serie_26_MAX-projection (2).tif:0504-0502	4258.28	25.537	621.381	0	255	0.599702	0.680341		2	Cav1KO MEF 9EG7-488 Hypoosmotic 1-10 10min_serie_1_MAX-projection (2).tif:0535-0537	2464.63	19.389	345.309	0	255	0.786689	0.963495
	3	Cav1WT MEF 9EG7-488 Hypoosmotic 1-10 10min_serie_26_MAX-projection (3).tif:0549-0513	2575.93	32.139	380.587	0	255	1.24766	1.41543		3	Cav1KO MEF 9EG7-488 Hypoosmotic 1-10 10min_serie_1_MAX-projection (3).tif:0524-0601	1255.84	28.336	331.409	0	255	2.25634	2.76345
	4	Cav1WT MEF 9EG7-488 Hypoosmotic 1-10 10min_serie_26_MAX-projection (5).tif:0538-0516	2215.19	20.754	438.139	0	255	0.936896	1.06288		4	Cav1KO MEF 9EG7-488 Hypoosmotic 1-10 10min_serie_1_MAX-projection (4).tif:0412-0306	2492.06	32.304	402.286	0	255	1.29628	1.58761
	5	Cav1WT MEF 9EG7-488 Hypoosmotic 1-10 10min_serie_26_MAX-projection (6).tif:0441-0542	2317.62	28.862	453.839	0	255	1.24533	1.41278		5	Cav1KO MEF 9EG7-488 Hypoosmotic 1-10 10min_serie_1_MAX-projection (4).tif	1151.24	36.07	264.469	0	255	3.13314	3.8373
	6	Cav1WT MEF 9EG7-488 Hypoosmotic 1-10 10min_serie_26_MAX-projection (7).tif:0449-0507	1053.74	16.132	218.579	0	255	1.53093	1.73678		6	Cav1KO MEF 9EG7-488 Hypoosmotic 1-10 10min_serie_1_MAX-projection (5).tif:0419-0586	1288.46	43.64	373.517	0	255	3.38699	4.1482
	7	Cav1WT MEF 9EG7-488 Hypoosmotic 1-10 10min_serie_26_MAX-projection (8).tif:0338-0512	2580.84	25.806	374.044	0	255	0.999907	1.13436		7	Cav1KO MEF 9EG7-488 Hypoosmotic 1-10 10min_serie_1_MAX-projection (6).tif:0271-0514	1842.39	33.36	227.9	0	255	1.81069	2.21763
	8	Cav1WT MEF 9EG7-488 Hypoosmotic 1-10 10min_serie_26_MAX-projection (11).tif:0574-0588	2267.72	17.744	338.347	0	255	0.782461	0.887675		8	Cav1KO MEF 9EG7-488 Hypoosmotic 1-10 10min_serie_1_MAX-projection (7).tif:0604-0534	1008.26	25.87	204.62	0	255	2.5658	3.14245
	9	Cav1WT MEF 9EG7-488 Hypoosmotic 1-10 10min_serie_26_MAX-projection (12).tif:0507-0612	4260.11	25.18	472.11	0	255	0.591064	0.670542		9	Cav1KO MEF 9EG7-488 Hypoosmotic 1-10 10min_serie_1_MAX-projection (8).tif:0447-0542	1896	27.242	436.867	0	255	1.43682	1.75973
	10	Cav1WT MEF 9EG7-488 Hypoosmotic 1-10 10min_serie_26_MAX-projection (13).tif:0526-0455	1536.93	19.828	303.356	0	255	1.2901	1.46357		10	Cav1KO MEF 9EG7-488 Hypoosmotic 1-10 10min_serie_1_MAX-projection (10).tif	1395.52	29.971	370.271	0	255	2.14765	2.63033
	11	Cav1WT MEF 9EG7-488 Hypoosmotic 1-10 10min_serie_26_MAX-projection (14).tif:0465-0470	3781.07	21.507	456.623	0	255	0.568807	0.645292		11	Cav1KO MEF 9EG7-488 Hypoosmotic 1-10 10min_serie_1_MAX-projection (11).tif:0625-0502	2010.57	23.679	534.028	0	255	1.17773	1.44242
	12	Cav1WT MEF 9EG7-488 Hypoosmotic 1-10 10min_serie_26_MAX-projection (15).tif:0511-0499	1584.08	17.41	311.989	0	255	1.09906	1.24684		12	Cav1KO MEF 9EG7-488 Hypoosmotic 1-10 10min_serie_1_MAX-projection (12).tif:0528-0568	2907.8	25.559	477.961	0	255	0.878979	1.07653
	13	Cav1WT MEF 9EG7-488 Hypoosmotic 1-10 10min_serie_26_MAX-projection (17).tif:0582-0504	2033.1	16.799	397.623	0	255	0.826275	0.93738		13	Cav1KO MEF 9EG7-488 Hypoosmotic 1-10 10min_serie_1_MAX-projection (13).tif:0563-0485	1841	18.506	486.882	0	255	1.00521	1.23113
	14	Cav1WT MEF 9EG7-488 Hypoosmotic 1-10 10min_serie_26_MAX-projection (18).tif:0474-0589	2895.66	20.265	484.09	0	255	0.699841	0.793945		14	Cav1KO MEF 9EG7-488 Hypoosmotic 1-10 10min_serie_1_MAX-projection (14).tif:0501-0524	3963.8	27.341	510.397	0	255	0.689768	0.844791
	15	Cav1WT MEF 9EG7-488 Hypoosmotic 1-10 10min_serie_26_MAX-projection (19).tif:0382-0509	2638.88	26.855	499.012	0	255	1.01767	1.15451		15	Cav1KO MEF 9EG7-488 Hypoosmotic 1-10 10min_serie_1_MAX-projection (16).tif:0507-0474	3438.49	20.17	423.477	0	255	0.586594	0.71843
	16	Cav1WT MEF 9EG7-488 Hypoosmotic 1-10 10min_serie_26_MAX-projection (20).tif:0469-0561	3660.21	20.727	357.636	0	255	0.566279	0.642424		16	Cav1KO MEF 9EG7-488 Hypoosmotic 1-10 10min_serie_1_MAX-projection (17).tif:0396-0566	1197.82	21.646	221.479	0	255	1.80711	2.21325
	17	Cav1WT MEF 9EG7-488 Hypoosmotic 1-10 10min_serie_26_MAX-projection (21).tif:0550-0429	1593.92	23.172	412.27	0	255	1.45377	1.64926		17	Cav1KO MEF 9EG7-488 Hypoosmotic 1-10 10min_serie_1_MAX-projection (18).tif:0433-0564	4222.52	33.565	340.391	0	255	0.794905	0.973558
	18	Cav1WT MEF 9EG7-488 Hypoosmotic 1-10 10min_serie_26_MAX-projection (22).tif:0482-0625	3101.47	29.656	500.251	0	255	0.956192	1.08477		18	Cav1KO MEF 9EG7-488 Hypoosmotic 1-10 10min_serie_1_MAX-projection (19).tif:0424-0513	1716.48	19.569	376.131	0	255	1.14006	1.39629
	19	Cav1WT MEF 9EG7-488 Hypoosmotic 1-10 10min_serie_26_MAX-projection (23).tif:0509-0513	1601.48	31.691	232.476	0	255	1.97886	2.24494		19	Cav1KO MEF 9EG7-488 Hypoosmotic 1-10 10min_serie_1_MAX-projection (20).tif:0513-0558	3163.71	29.342	473.477	0	255	0.927456	1.1359
	20	Cav1WT MEF 9EG7-488 Hypoosmotic 1-10 10min_serie_26_MAX-projection (24).tif:0499-0415	1570.98	31.965	323.849	0	255	2.03472	2.30832		20	Cav1KO MEF 9EG7-488 Hypoosmotic 1-10 10min_serie_1_MAX-projection (22).tif:0486-0372	1940.53	13.195	349.535	0	255	0.679967	0.832788
	21	Cav1WT MEF 9EG7-488 Hypoosmotic 1-10 10min_serie_26_MAX-projection (25).tif:0508-0486	4638.9	27.241	525.136	0	255	0.58723	0.666192		21	Cav1KO MEF 9EG7-488 Hypoosmotic 1-10 10min_serie_1_MAX-projection (25).tif:0466-0512	2785.68	19.858	520.855	0	255	0.712861	0.873074
	22	Hypoosmotic 1-10 10min 9EG7-488 primary Ab before fixation WT vs KO eLife 2022 SECOND.lif - Cav1WT MEF 9EG7-488 Hypo 3_serie_3_MAX-projection.tif:0522-0441	3046.23	28.764	324.871	0	255	0.944248	1.07122		22	Hypoosmotic 1-10 10min 9EG7-488 primary Ab before fixation WT vs KO eLife 2022 SECOND.lif - Cav1KO MEF 9EG7-488 Hypo 2_serie_17_MAX-projection.tif:0550-0375	2581.68	21.089	390.735	0	255	0.81687	1.00046
	23	Hypoosmotic 1-10 10min 9EG7-488 primary Ab before fixation WT vs KO eLife 2022 SECOND.lif - Cav1WT MEF 9EG7-488 Hypo 4_serie_4_MAX-projection.tif:0429-0533	3494.26	14.558	388.379	0	255	0.416626	0.472647		23	Hypoosmotic 1-10 10min 9EG7-488 primary Ab before fixation WT vs KO eLife 2022 SECOND.lif - Cav1KO MEF 9EG7-488 Hypo 3_serie_18_MAX-projection.tif:0437-0521	1432.01	22.178	382.995	0	255	1.54873	1.89681
	24	Hypoosmotic 1-10 10min 9EG7-488 primary Ab before fixation WT vs KO eLife 2022 SECOND.lif - Cav1WT MEF 9EG7-488 Hypo 5_serie_5_MAX-projection.tif:0454-0564	2388.7	20.2	292.114	0	255	0.845648	0.959358		24	Hypoosmotic 1-10 10min 9EG7-488 primary Ab before fixation WT vs KO eLife 2022 SECOND.lif - Cav1KO MEF 9EG7-488 Hypo 4_serie_19_MAX-projection.tif:0535-0518	1680.42	20.938	318.157	0	255	1.246	1.52603
	25	Hypoosmotic 1-10 10min 9EG7-488 primary Ab before fixation WT vs KO eLife 2022 SECOND.lif - Cav1WT MEF 9EG7-488 Hypo 6_serie_6_MAX-projection.tif:0515-0471	3617.38	15.134	380.111	0	255	0.418369	0.474625		25	Hypoosmotic 1-10 10min 9EG7-488 primary Ab before fixation WT vs KO eLife 2022 SECOND.lif - Cav1KO MEF 9EG7-488 Hypo 6_serie_21_MAX-projection.tif:0488-0561	3033.76	26.832	511.098	0	255	0.884448	1.08322
	26	Hypoosmotic 1-10 10min 9EG7-488 primary Ab before fixation WT vs KO eLife 2022 SECOND.lif - Cav1WT MEF 9EG7-488 Hypo 7_serie_7_MAX-projection.tif:0441-0546	1496.38	26.8	394.422	0	255	1.79099	2.03181		26	Hypoosmotic 1-10 10min 9EG7-488 primary Ab before fixation WT vs KO eLife 2022 SECOND.lif - Cav1KO MEF 9EG7-488 Hypo 7_serie_22_MAX-projection.tif:0520-0450	2770.2	19.693	426.161	0	255	0.710887	0.870656
	27	Hypoosmotic 1-10 10min 9EG7-488 primary Ab before fixation WT vs KO eLife 2022 SECOND.lif - Cav1WT MEF 9EG7-488 Hypo 8_serie_8_MAX-projection.tif:0541-0580	2008	15.857	326.092	0	255	0.789692	0.895878		27	Hypoosmotic 1-10 10min 9EG7-488 primary Ab before fixation WT vs KO eLife 2022 SECOND.lif - Cav1KO MEF 9EG7-488 Hypo 8_serie_23_MAX-projection.tif:0646-0531	2029.79	31.578	418.019	0	255	1.55573	1.90537
	28	Hypoosmotic 1-10 10min 9EG7-488 primary Ab before fixation WT vs KO eLife 2022 SECOND.lif - Cav1WT MEF 9EG7-488 Hypo 9_serie_9_MAX-projection.tif:0434-0594	1185.95	18.549	231.69	0	255	1.56407	1.77438		28	Hypoosmotic 1-10 10min 9EG7-488 primary Ab before fixation WT vs KO eLife 2022 SECOND.lif - Cav1KO MEF 9EG7-488 Hypo 9_serie_24_MAX-projection.tif:0428-0490	2556.27	16.126	278.706	0	255	0.63084	0.772619
	29	Hypoosmotic 1-10 10min 9EG7-488 primary Ab before fixation WT vs KO eLife 2022 SECOND.lif - Cav1WT MEF 9EG7-488 Hypo 10_serie_10_MAX-projection.tif:0578-0516	1432.41	17.902	263.242	0	255	1.24978	1.41783		29	Hypoosmotic 1-10 10min 9EG7-488 primary Ab before fixation WT vs KO eLife 2022 SECOND.lif - Cav1KO MEF 9EG7-488 Hypo 10_serie_25_MAX-projection.tif:0485-0421	1757.41	20.737	295.148	0	255	1.17998	1.44517
	30	Hypoosmotic 1-10 10min 9EG7-488 primary Ab before fixation WT vs KO eLife 2022 SECOND.lif - Cav1WT MEF 9EG7-488 Hypo 11_serie_11_MAX-projection.tif:0593-0512	2819.53	13.81	305.267	0	255	0.489798	0.555659		30	Hypoosmotic 1-10 10min 9EG7-488 primary Ab before fixation WT vs KO eLife 2022 SECOND.lif - Cav1KO MEF 9EG7-488 Hypo 11_serie_26_MAX-projection.tif:0540-0501	2124.41	22.784	382.556	0	255	1.07248	1.31352
	31	Hypoosmotic 1-10 10min 9EG7-488 primary Ab before fixation WT vs KO eLife 2022 SECOND.lif - Cav1WT MEF 9EG7-488 Hypo 12_serie_12_MAX-projection.tif:0408-0535	3775.11	24.307	354.874	0	255	0.643876	0.730455		31	Hypoosmotic 1-10 10min 9EG7-488 primary Ab before fixation WT vs KO eLife 2022 SECOND.lif - Cav1KO MEF 9EG7-488 Hypo 12_serie_27_MAX-projection.tif:0490-0507	1823.71	16.698	276.279	0	255	0.915605	1.12138
	32	Hypoosmotic 1-10 10min 9EG7-488 primary Ab before fixation WT vs KO eLife 2022 SECOND.lif - Cav1WT MEF 9EG7-488 Hypo 13_serie_13_MAX-projection.tif:0531-0512	4512.62	22.677	553.78	0	255	0.502524	0.570096		32	Hypoosmotic 1-10 10min 9EG7-488 primary Ab before fixation WT vs KO eLife 2022 SECOND.lif - Cav1KO MEF 9EG7-488 Hypo 13_serie_28_MAX-projection.tif:0487-0432	2146.49	22.371	492.81	0	255	1.04221	1.27644
	33	Hypoosmotic 1-10 10min 9EG7-488 primary Ab before fixation WT vs KO eLife 2022 SECOND.lif - Cav1WT MEF 9EG7-488 Hypo 14_serie_14_MAX-projection.tif:0393-0637	2461.74	22.179	293.409	0	255	0.900948	1.02209		33	Hypoosmotic 1-10 10min 9EG7-488 primary Ab before fixation WT vs KO eLife 2022 SECOND.lif - Cav1KO MEF 9EG7-488 Hypo 14_serie_29_MAX-projection.tif:0467-0407	1164	23.376	459.218	0	255	2.00825	2.45959
	34	Hypoosmotic 1-10 10min 9EG7-488 primary Ab before fixation WT vs KO eLife 2022 SECOND.lif - Cav1WT MEF 9EG7-488 Hypo 15_serie_15_MAX-projection.tif:0442-0490	2459.97	21.507	351.406	0	255	0.874279	0.991839		34	Hypoosmotic 1-10 10min 9EG7-488 primary Ab before fixation WT vs KO eLife 2022 SECOND.lif - Cav1KO MEF 9EG7-488 Hypo 15_serie_30_MAX-projection.tif:0723-0595	2619.05	16.98	369.256	0	255	0.648327	0.794036
	35	Hypoosmotic 1-10 10min 9EG7-488 primary Ab before fixation WT vs KO eLife 2022 SECOND.lif - Cav1WT MEF 9EG7-488 Hypo_serie_1_MAX-projection.tif:0585-0574	2304.25	31.511	305.702	0	255	1.36752	1.5514
			Average	22.5436				0.982371	1.11447				Average	25.7057				1.38766	1.69953
			SEM	0.931834				0.0739151	0.0838541				SEM	1.60812				0.140321	0.171858
	Cav1WT	Label	Area	Mean	Perimeter	MinThr	MaxThr	Mean Int/Area %			Cav1KO	Label	Area	Mean	Perimeter	MinThr	MaxThr	Mean Int/Area %
Hypoosmotic 1-20 10min	1	Cav1WT MEF 9EG7-488 Hypoosmotic 1-20 10min 25_serie_25_MAX-projection (1).tif:0489-0554	1686.2	50.204	706.623	0	255	2.97735	3.3777	Hypoosmotic 1-20 10min	1	Cav1KO MEF 9EG7-488 Hypoosmotic 1-20 10min_serie_26_MAX-projection (1).tif	2014.04	17.852	453.857	0	255	0.886376	1.08559
	2	Cav1WT MEF 9EG7-488 Hypoosmotic 1-20 10min 25_serie_25_MAX-projection (2).tif:0381-0582	2451.44	167.425	495.27	0	255	6.82965	7.748		2	Cav1KO MEF 9EG7-488 Hypoosmotic 1-20 10min_serie_26_MAX-projection (2).tif	3980.2	13.319	554.047	0	255	0.334631	0.409838
	3	Cav1WT MEF 9EG7-488 Hypoosmotic 1-20 10min 25_serie_25_MAX-projection (3).tif:0530-0490	2362.69	46.928	387.335	0	255	1.98621	2.25328		3	Cav1KO MEF 9EG7-488 Hypoosmotic 1-20 10min_serie_26_MAX-projection (3).tif	1867.63	13.743	393.761	0	255	0.73585	0.901231
	4	Cav1WT MEF 9EG7-488 Hypoosmotic 1-20 10min 25_serie_25_MAX-projection (4).tif:0408-0492	4970.46	35.259	565.59	0	255	0.70937	0.804756		4	Cav1KO MEF 9EG7-488 Hypoosmotic 1-20 10min_serie_26_MAX-projection (4).tif:0488-0723	2918.44	46.07	282.012	0	255	1.57858	1.93337
	5	Cav1WT MEF 9EG7-488 Hypoosmotic 1-20 10min 25_serie_25_MAX-projection (5).tif:0501-0487	3109.97	38.649	560.487	0	255	1.24274	1.40985		5	Cav1KO MEF 9EG7-488 Hypoosmotic 1-20 10min_serie_26_MAX-projection (5).tif:0402-0578	2726.75	10.298	367.11	0	255	0.377666	0.462546
	6	Cav1WT MEF 9EG7-488 Hypoosmotic 1-20 10min 25_serie_25_MAX-projection (6).tif:0521-0448	1372.05	22.13	318.92	0	255	1.61291	1.82979		6	Cav1KO MEF 9EG7-488 Hypoosmotic 1-20 10min_serie_26_MAX-projection (6).tif:0459-0580	2342.12	28.606	499.971	0	255	1.22137	1.49587
	7	Cav1WT MEF 9EG7-488 Hypoosmotic 1-20 10min 25_serie_25_MAX-projection (7).tif:0522-0514	2328.49	29.694	380.64	0	255	1.27525	1.44672		7	Cav1KO MEF 9EG7-488 Hypoosmotic 1-20 10min_serie_26_MAX-projection (7).tif:0464-0559	1444.64	28.66	282.707	0	255	1.98389	2.42976
	8	Cav1WT MEF 9EG7-488 Hypoosmotic 1-20 10min 25_serie_25_MAX-projection (8).tif:0488-0494	5296.58	18.98	705.705	0	255	0.358345	0.406529		8	Cav1KO MEF 9EG7-488 Hypoosmotic 1-20 10min_serie_26_MAX-projection (8).tif:0687-0178	758.112	25.743	246.051	0	255	3.39567	4.15884
	9	Cav1WT MEF 9EG7-488 Hypoosmotic 1-20 10min 25_serie_25_MAX-projection (9).tif:0436-0581	2533.83	23.467	426.636	0	255	0.926147	1.05068		9	Cav1KO MEF 9EG7-488 Hypoosmotic 1-20 10min_serie_26_MAX-projection (9).tif:0486-0676	2233.66	17.093	217.712	0	255	0.765245	0.937232
	10	Cav1WT MEF 9EG7-488 Hypoosmotic 1-20 10min 25_serie_25_MAX-projection (10).tif:0610-0365	720.615	129.666	169.051	0	255	17.9938	20.4133		10	Cav1KO MEF 9EG7-488 Hypoosmotic 1-20 10min_serie_26_MAX-projection (10).tif:0500-0471	659.043	60.104	261.14	0	255	9.11989	11.1696
	11	Cav1WT MEF 9EG7-488 Hypoosmotic 1-20 10min 25_serie_25_MAX-projection (11).tif:0539-0538	1086.1	39.385	366.165	0	255	3.62627	4.11388		11	Cav1KO MEF 9EG7-488 Hypoosmotic 1-20 10min_serie_26_MAX-projection (11).tif:0453-0542	2459.51	35.759	310.889	0	255	1.4539	1.78067
	12	Cav1WT MEF 9EG7-488 Hypoosmotic 1-20 10min 25_serie_25_MAX-projection (12).tif:0551-0460	1467.61	26.9	291.951	0	255	1.83292	2.07938		12	Cav1KO MEF 9EG7-488 Hypoosmotic 1-20 10min_serie_26_MAX-projection (12).tif:0615-0514	873.623	41.208	313.528	0	255	4.71691	5.77702
	13	Cav1WT MEF 9EG7-488 Hypoosmotic 1-20 10min 25_serie_25_MAX-projection (13).tif:0500-0538	2908.88	29.208	546.117	0	255	1.0041	1.13911		13	Cav1KO MEF 9EG7-488 Hypoosmotic 1-20 10min_serie_26_MAX-projection (13).tif:0522-0600	430.383	37.729	236.089	0	255	8.76638	10.7366
	14	Cav1WT MEF 9EG7-488 Hypoosmotic 1-20 10min 25_serie_25_MAX-projection (14).tif:0522-0611	1013.11	42.931	289.692	0	255	4.23753	4.80733		14	Cav1KO MEF 9EG7-488 Hypoosmotic 1-20 10min_serie_26_MAX-projection (14).tif:0443-0563	375.744	47.947	126.084	0	255	12.7605	15.6284
	15	Cav1WT MEF 9EG7-488 Hypoosmotic 1-20 10min 25_serie_25_MAX-projection (15).tif:0361-0586	448.613	54.303	198.238	0	255	12.1046	13.7323		15	Cav1KO MEF 9EG7-488 Hypoosmotic 1-20 10min_serie_26_MAX-projection (15).tif:0527-0541	545.764	56.549	181.173	0	255	10.3614	12.6901
	16	Cav1WT MEF 9EG7-488 Hypoosmotic 1-20 10min 25_serie_25_MAX-projection (16).tif:0504-0533	3516.01	16.163	411.526	0	255	0.459698	0.521511		16	Cav1KO MEF 9EG7-488 Hypoosmotic 1-20 10min_serie_26_MAX-projection (16).tif:0499-0367	972.965	22.934	387.469	0	255	2.35712	2.88688
	17	Cav1WT MEF 9EG7-488 Hypoosmotic 1-20 10min 25_serie_25_MAX-projection (17).tif:0501-0527	3671.99	15.553	569.266	0	255	0.423558	0.480511		17	Cav1KO MEF 9EG7-488 Hypoosmotic 1-20 10min_serie_26_MAX-projection (17).tif:0469-0509	698.406	42.839	164.627	0	255	6.13382	7.51238
	18	Cav1WT MEF 9EG7-488 Hypoosmotic 1-20 10min 25_serie_25_MAX-projection (18).tif:0442-0510	1993.42	88.757	664.275	0	255	4.45249	5.05119		18	Cav1KO MEF 9EG7-488 Hypoosmotic 1-20 10min_serie_26_MAX-projection (18).tif:0556-0635	560.686	90.932	286.385	0	255	16.218	19.8629
	19	Cav1WT MEF 9EG7-488 Hypoosmotic 1-20 10min 25_serie_25_MAX-projection (19).tif:0526-0490	1107.46	83.789	295.006	0	255	7.56584	8.58318		19	Cav1KO MEF 9EG7-488 Hypoosmotic 1-20 10min_serie_26_MAX-projection (19).tif:0172-0388	294.676	84.463	123.92	0	255	28.663	35.1049
	20	Cav1WT MEF 9EG7-488 Hypoosmotic 1-20 10min 25_serie_25_MAX-projection (20).tif:0500-0564	3783.69	70.454	587.733	0	255	1.86204	2.11242		20	Cav1KO MEF 9EG7-488 Hypoosmotic 1-20 10min_serie_26_MAX-projection (19).tif:0821-0643	347.875	109.294	114.414	0	255	31.4176	38.4786
	21	Cav1WT MEF 9EG7-488 Hypoosmotic 1-20 10min 25_serie_25_MAX-projection (21).tif:0347-0550	1260.95	37.432	346.361	0	255	2.96855	3.36772		21	Cav1KO MEF 9EG7-488 Hypoosmotic 1-20 10min_serie_26_MAX-projection (20).tif:0469-0497	2146.97	10.872	322.174	0	255	0.506388	0.620197
	22	Cav1WT MEF 9EG7-488 Hypoosmotic 1-20 10min 25_serie_25_MAX-projection (22).tif:0524-0517	2160.52	61.427	609.566	0	255	2.84316	3.22547		22	Hypoosmotic 1-20 10min 9EG7-488 primary Ab before fixation WT vs KO eLife 2022 SECOND.lif - Cav1KO MEF 9EG7-488 Hypo 2_serie_17_MAX-projection.tif:0384-0482	1082.38	36.634	154.694	0	255	3.38458	4.14526
	23	Cav1WT MEF 9EG7-488 Hypoosmotic 1-20 10min 25_serie_25_MAX-projection (23).tif:0513-0504	1692.27	60.185	608.125	0	255	3.55646	4.03468		23	Hypoosmotic 1-20 10min 9EG7-488 primary Ab before fixation WT vs KO eLife 2022 SECOND.lif - Cav1KO MEF 9EG7-488 Hypo 2_serie_17_MAX-projection.tif:0680-0511	976.172	20.694	173.527	0	255	2.11991	2.59636
	24	Cav1WT MEF 9EG7-488 Hypoosmotic 1-20 10min 25_serie_25_MAX-projection (24).tif:0502-0559	575.738	53.167	197.368	0	255	9.23458	10.4763		24	Hypoosmotic 1-20 10min 9EG7-488 primary Ab before fixation WT vs KO eLife 2022 SECOND.lif - Cav1KO MEF 9EG7-488 Hypo 3_serie_18_MAX-projection.tif	1033.54	35.198	280.915	0	255	3.40557	4.17096
	25	Cav1WT MEF 9EG7-488 Hypoosmotic 1-20 10min 25_serie_25_MAX-projection (25).tif:0668-0510	1220.9	62.657	244.563	0	255	5.13205	5.82213		25	Hypoosmotic 1-20 10min 9EG7-488 primary Ab before fixation WT vs KO eLife 2022 SECOND.lif - Cav1KO MEF 9EG7-488 Hypo 4_serie_19_MAX-projection.tif:0511-0558	4925.83	36.632	575.624	0	255	0.743672	0.91081
	26	Hypoosmotic 1-20 10min 9EG7-488 primary Ab before fixation WT vs KO eLife 2022 SECOND.lif - Cav1WT MEF 9EG7-488 Hypo 2_serie_2_MAX-projection.tif:0582-0416	2153.77	37.774	388.79	0	255	1.75385	1.98968		26	Hypoosmotic 1-20 10min 9EG7-488 primary Ab before fixation WT vs KO eLife 2022 SECOND.lif - Cav1KO MEF 9EG7-488 Hypo 5_serie_20_MAX-projection.tif:0562-0632	2387.78	28.254	446.941	0	255	1.18327	1.44921
	27	Hypoosmotic 1-20 10min 9EG7-488 primary Ab before fixation WT vs KO eLife 2022 SECOND.lif - Cav1WT MEF 9EG7-488 Hypo 3_serie_3_MAX-projection.tif:0507-0372	2044.1	70.699	376.299	0	255	3.45868	3.92375		27	Hypoosmotic 1-20 10min 9EG7-488 primary Ab before fixation WT vs KO eLife 2022 SECOND.lif - Cav1KO MEF 9EG7-488 Hypo 6_serie_21_MAX-projection.tif:0467-0533	2122.57	37.187	500.967	0	255	1.75198	2.14573
	28	Hypoosmotic 1-20 10min 9EG7-488 primary Ab before fixation WT vs KO eLife 2022 SECOND.lif - Cav1WT MEF 9EG7-488 Hypo 4_serie_4_MAX-projection.tif:0594-0402	2327.57	101.757	548.447	0	255	4.37181	4.95967		28	Hypoosmotic 1-20 10min 9EG7-488 primary Ab before fixation WT vs KO eLife 2022 SECOND.lif - Cav1KO MEF 9EG7-488 Hypo 7_serie_22_MAX-projection.tif:0513-0462	1959.6	35.689	376.886	0	255	1.82124	2.23055
	29	Hypoosmotic 1-20 10min 9EG7-488 primary Ab before fixation WT vs KO eLife 2022 SECOND.lif - Cav1WT MEF 9EG7-488 Hypo 4_serie_4_MAX-projection.tif:0284-0777	1404.86	78.046	327.912	0	255	5.55544	6.30245		29	Hypoosmotic 1-20 10min 9EG7-488 primary Ab before fixation WT vs KO eLife 2022 SECOND.lif - Cav1KO MEF 9EG7-488 Hypo 8_serie_23_MAX-projection.tif:0515-0512	2908.18	24.653	412.579	0	255	0.847711	1.03823
	30	Hypoosmotic 1-20 10min 9EG7-488 primary Ab before fixation WT vs KO eLife 2022 SECOND.lif - Cav1WT MEF 9EG7-488 Hypo 5_serie_5_MAX-projection.tif:0784-0651	582.903	125.382	225.353	0	255	21.5099	24.4023		30	Hypoosmotic 1-20 10min 9EG7-488 primary Ab before fixation WT vs KO eLife 2022 SECOND.lif - Cav1KO MEF 9EG7-488 Hypo 9_serie_24_MAX-projection.tif:0558-0520	3090.66	37.685	493.637	0	255	1.21932	1.49336
	31	Hypoosmotic 1-20 10min 9EG7-488 primary Ab before fixation WT vs KO eLife 2022 SECOND.lif - Cav1WT MEF 9EG7-488 Hypo 6_serie_6_MAX-projection.tif:0481-0514	1354.17	46.232	235.059	0	255	3.41406	3.87313		31	Hypoosmotic 1-20 10min 9EG7-488 primary Ab before fixation WT vs KO eLife 2022 SECOND.lif - Cav1KO MEF 9EG7-488 Hypo 10_serie_25_MAX-projection.tif:0514-0649	1804.72	28.318	379.092	0	255	1.56911	1.92176
	32	Hypoosmotic 1-20 10min 9EG7-488 primary Ab before fixation WT vs KO eLife 2022 SECOND.lif - Cav1WT MEF 9EG7-488 Hypo 7_serie_7_MAX-projection.tif:0474-0619	1695.6	66.6	336.515	0	255	3.92782	4.45597		32	Hypoosmotic 1-20 10min 9EG7-488 primary Ab before fixation WT vs KO eLife 2022 SECOND.lif - Cav1KO MEF 9EG7-488 Hypo 10_serie_25_MAX-projection.tif:0685-0398	969.709	52.164	236.024	0	255	5.37935	6.58834
	33	Hypoosmotic 1-20 10min 9EG7-488 primary Ab before fixation WT vs KO eLife 2022 SECOND.lif - Cav1WT MEF 9EG7-488 Hypo 8_serie_8_MAX-projection.tif:0723-0690	1231.97	73.409	281.578	0	255	5.95865	6.75988		33	Hypoosmotic 1-20 10min 9EG7-488 primary Ab before fixation WT vs KO eLife 2022 SECOND.lif - Cav1KO MEF 9EG7-488 Hypo 11_serie_26_MAX-projection.tif:0608-0510	3916.69	16.644	669.991	0	255	0.424951	0.520458
	34	Hypoosmotic 1-20 10min 9EG7-488 primary Ab before fixation WT vs KO eLife 2022 SECOND.lif - Cav1WT MEF 9EG7-488 Hypo 9_serie_9_MAX-projection.tif:0528-0526	737.252	47.754	285.815	0	255	6.4773	7.34827		34	Hypoosmotic 1-20 10min 9EG7-488 primary Ab before fixation WT vs KO eLife 2022 SECOND.lif - Cav1KO MEF 9EG7-488 Hypo 12_serie_27_MAX-projection.tif:0663-0448	1129.45	30.986	275.87	0	255	2.74346	3.36005
	35	Hypoosmotic 1-20 10min 9EG7-488 primary Ab before fixation WT vs KO eLife 2022 SECOND.lif - Cav1WT MEF 9EG7-488 Hypo 10_serie_10_MAX-projection.tif:0453-0498	3083.46	41.195	457.057	0	255	1.336	1.51565		35	Hypoosmotic 1-20 10min 9EG7-488 primary Ab before fixation WT vs KO eLife 2022 SECOND.lif - Cav1KO MEF 9EG7-488 Hypo 12_serie_27_MAX-projection.tif:0272-0693	1484.52	27.465	315.008	0	255	1.8501	2.2659
	36	Hypoosmotic 1-20 10min 9EG7-488 primary Ab before fixation WT vs KO eLife 2022 SECOND.lif - Cav1WT MEF 9EG7-488 Hypo 11_serie_11_MAX-projection.tif:0510-0511	3458.54	68.33	471.214	0	255	1.97569	2.24135		36	Hypoosmotic 1-20 10min 9EG7-488 primary Ab before fixation WT vs KO eLife 2022 SECOND.lif - Cav1KO MEF 9EG7-488 Hypo 13_serie_28_MAX-projection.tif:0491-0457	1255.88	25.303	212.444	0	255	2.01475	2.46756
	37	Hypoosmotic 1-20 10min 9EG7-488 primary Ab before fixation WT vs KO eLife 2022 SECOND.lif - Cav1WT MEF 9EG7-488 Hypo 12_serie_12_MAX-projection.tif:0590-0550	1364.08	47.468	204.898	0	255	3.47986	3.94778		37	Hypoosmotic 1-20 10min 9EG7-488 primary Ab before fixation WT vs KO eLife 2022 SECOND.lif - Cav1KO MEF 9EG7-488 Hypo 14_serie_29_MAX-projection.tif:0448-0556	3629.81	31.875	362.291	0	255	0.878144	1.0755
	38	Hypoosmotic 1-20 10min 9EG7-488 primary Ab before fixation WT vs KO eLife 2022 SECOND.lif - Cav1WT MEF 9EG7-488 Hypo 13_serie_13_MAX-projection.tif:0525-0563	2648.77	41.832	506.184	0	255	1.5793	1.79166		38	Hypoosmotic 1-20 10min 9EG7-488 primary Ab before fixation WT vs KO eLife 2022 SECOND.lif - Cav1KO MEF 9EG7-488 Hypo 15_serie_30_MAX-projection.tif	2581.4	31.965	339.941	0	255	1.23828	1.51658
	39	Hypoosmotic 1-20 10min 9EG7-488 primary Ab before fixation WT vs KO eLife 2022 SECOND.lif - Cav1WT MEF 9EG7-488 Hypo 14_serie_14_MAX-projection.tif:0694-0447	1033.47	72.147	354.987	0	255	6.98104	7.91974		39	Hypoosmotic 1-20 10min 9EG7-488 primary Ab before fixation WT vs KO eLife 2022 SECOND.lif - Cav1KO MEF 9EG7-488 Hypo_serie_16_MAX-projection.tif:0510-0498	4376.96	33.387	585.172	0	255	0.762789	0.934224
	40	Hypoosmotic 1-20 10min 9EG7-488 primary Ab before fixation WT vs KO eLife 2022 SECOND.lif - Cav1WT MEF 9EG7-488 Hypo 14_serie_14_MAX-projection.tif:0272-0547	1479.69	60.675	392.715	0	255	4.10052	4.6519
	41	Hypoosmotic 1-20 10min 9EG7-488 primary Ab before fixation WT vs KO eLife 2022 SECOND.lif - Cav1WT MEF 9EG7-488 Hypo 15_serie_15_MAX-projection.tif:0453-0510	3296.79	59.378	456.204	0	255	1.80109	2.04327
	42	Hypoosmotic 1-20 10min 9EG7-488 primary Ab before fixation WT vs KO eLife 2022 SECOND.lif - Cav1WT MEF 9EG7-488 Hypo_serie_1_MAX-projection.tif:0553-0486	2035.68	69.649	388.433	0	255	3.42141	3.88147
			Average	57.4533				4.24567	4.81656				Average	36.2243				4.54083	5.56137
			SEM	4.83466				0.668922	0.758868				SEM	3.3679				1.12472	1.37749
	Cav1WT	Label	Area	Mean	Perimeter	MinThr	MaxThr	Mean Int/Area %			Cav1KO	Label	Area	Mean	Perimeter	MinThr	MaxThr	Mean Int/Area %
Hypoosmotic 1-20 20min	1	Hypoosmotic 1-20 20min 9EG7-488 primary Ab before fixation WT vs KO eLife 2022 SECOND.lif - Cav1WT MEF 9EG7-488 Hypo 2_serie_2_MAX-projection.tif:0512-0528	1526.09	81.431	292.02	0	255	5.33591	6.05341	Hypoosmotic 1-20 20min	1	Hypoosmotic 1-20 20min 9EG7-488 primary Ab before fixation WT vs KO eLife 2022 SECOND.lif - Cav1KO MEF 9EG7-488 Hypo 2_serie_13_MAX-projection.tif:0405-0558	694.067	26.544	199.478	0	255	3.82441	4.68394
	2	Hypoosmotic 1-20 20min 9EG7-488 primary Ab before fixation WT vs KO eLife 2022 SECOND.lif - Cav1WT MEF 9EG7-488 Hypo 3_serie_3_MAX-projection.tif:0514-0484	6507.23	36.384	622.874	0	255	0.559132	0.634316		2	Hypoosmotic 1-20 20min 9EG7-488 primary Ab before fixation WT vs KO eLife 2022 SECOND.lif - Cav1KO MEF 9EG7-488 Hypo 3_serie_14_MAX-projection.tif:0471-0284	1623.63	17.508	322.878	0	255	1.07832	1.32067
	3	Hypoosmotic 1-20 20min 9EG7-488 primary Ab before fixation WT vs KO eLife 2022 SECOND.lif - Cav1WT MEF 9EG7-488 Hypo 4_serie_4_MAX-projection.tif:0649-0483	1379.77	64.263	457.774	0	255	4.65751	5.28378		3	Hypoosmotic 1-20 20min 9EG7-488 primary Ab before fixation WT vs KO eLife 2022 SECOND.lif - Cav1KO MEF 9EG7-488 Hypo 4_serie_15_MAX-projection.tif:0733-0561	759.438	29.113	192.178	0	255	3.83349	4.69506
	4	Hypoosmotic 1-20 20min 9EG7-488 primary Ab before fixation WT vs KO eLife 2022 SECOND.lif - Cav1WT MEF 9EG7-488 Hypo 5_serie_5_MAX-projection.tif:0578-0511	3444.26	23.815	400.102	0	255	0.691439	0.784414		4	Hypoosmotic 1-20 20min 9EG7-488 primary Ab before fixation WT vs KO eLife 2022 SECOND.lif - Cav1KO MEF 9EG7-488 Hypo 5_serie_16_MAX-projection.tif:0506-0499	1850.61	48.873	361.891	0	255	2.64091	3.23444
	5	Hypoosmotic 1-20 20min 9EG7-488 primary Ab before fixation WT vs KO eLife 2022 SECOND.lif - Cav1WT MEF 9EG7-488 Hypo 6_serie_6_MAX-projection.tif:0561-0537	2805.7	31.329	360.279	0	255	1.11662	1.26677		5	Hypoosmotic 1-20 20min 9EG7-488 primary Ab before fixation WT vs KO eLife 2022 SECOND.lif - Cav1KO MEF 9EG7-488 Hypo 7_serie_18_MAX-projection.tif:0474-0554	2073.67	13.449	247.916	0	255	0.648562	0.794324
	6	Hypoosmotic 1-20 20min 9EG7-488 primary Ab before fixation WT vs KO eLife 2022 SECOND.lif - Cav1WT MEF 9EG7-488 Hypo 7_serie_7_MAX-projection.tif:0462-0509	2504.13	35.971	321.009	0	255	1.43646	1.62962		6	Hypoosmotic 1-20 20min 9EG7-488 primary Ab before fixation WT vs KO eLife 2022 SECOND.lif - Cav1KO MEF 9EG7-488 Hypo 8_serie_19_MAX-projection.tif:0442-0542	3133.74	15.117	381.522	0	255	0.482394	0.590811
	7	Hypoosmotic 1-20 20min 9EG7-488 primary Ab before fixation WT vs KO eLife 2022 SECOND.lif - Cav1WT MEF 9EG7-488 Hypo 8_serie_8_MAX-projection.tif:0429-0538	3249.46	25.547	341.986	0	255	0.786193	0.891908		7	Hypoosmotic 1-20 20min 9EG7-488 primary Ab before fixation WT vs KO eLife 2022 SECOND.lif - Cav1KO MEF 9EG7-488 Hypo 9_serie_20_MAX-projection.tif:0338-0519	2094.98	12.605	237.28	0	255	0.601676	0.7369
	8	Hypoosmotic 1-20 20min 9EG7-488 primary Ab before fixation WT vs KO eLife 2022 SECOND.lif - Cav1WT MEF 9EG7-488 Hypo 9_serie_9_MAX-projection.tif:0488-0441	2309.96	16.237	292.447	0	255	0.702912	0.797429		8	Hypoosmotic 1-20 20min 9EG7-488 primary Ab before fixation WT vs KO eLife 2022 SECOND.lif - Cav1KO MEF 9EG7-488 Hypo 10_serie_21_MAX-projection.tif:0637-0498	873.239	126.814	275.074	0	255	14.5223	17.7861
	9	Hypoosmotic 1-20 20min 9EG7-488 primary Ab before fixation WT vs KO eLife 2022 SECOND.lif - Cav1WT MEF 9EG7-488 Hypo 10_serie_10_MAX-projection.tif:0482-0580	468.87	40.641	123.296	0	255	8.66786	9.83339		9	Hypoosmotic 1-20 20min 9EG7-488 primary Ab before fixation WT vs KO eLife 2022 SECOND.lif - Cav1KO MEF 9EG7-488 Hypo 11_serie_22_MAX-projection.tif:0513-0558	3114.3	30.179	433.203	0	255	0.969048	1.18684
	10	Hypoosmotic 1-20 20min 9EG7-488 primary Ab before fixation WT vs KO eLife 2022 SECOND.lif - Cav1WT MEF 9EG7-488 Hypo 11_serie_11_MAX-projection.tif:0460-0456	764.307	26.986	187.396	0	255	3.53078	4.00555		10	Hypoosmotic 1-20 20min 9EG7-488 primary Ab before fixation WT vs KO eLife 2022 SECOND.lif - Cav1KO MEF 9EG7-488 Hypo_serie_12_MAX-projection.tif:0518-0563	2165.12	22.265	369.442	0	255	1.02835	1.25947
	11	Hypoosmotic 1-20 20min 9EG7-488 primary Ab before fixation WT vs KO eLife 2022 SECOND.lif - Cav1WT MEF 9EG7-488 Hypo_serie_1_MAX-projection.tif:0556-0559	611.524	118.77	213.399	0	255	19.422	22.0335		11	Hypoosmotic 1-20 20min 9EG7-488 primary Ab before fixation WT vs KO eLife 2022 SECOND.lif - Cav1KO MEF 9EG7-488 Hypo 13_serie_13_MAX-projection.tif:0549-0604	1701.35	41.185	241.135	0	255	2.42072	2.96477
	12	Hypoosmotic 1-20 20min 9EG7-488 primary Ab before fixation WT vs KO eLife 2022 SECOND.lif - Cav1WT MEF 9EG7-488 Hypo 12_serie_23_MAX-projection.tif:0499-0472	2616.41	66.839	717.479	0	255	2.55461	2.89812		12	Hypoosmotic 1-20 20min 9EG7-488 primary Ab before fixation WT vs KO eLife 2022 SECOND.lif - Cav1KO MEF 9EG7-488 Hypo 14_serie_14_MAX-projection.tif:0510-0590	2375.01	24.123	260.782	0	255	1.0157	1.24397
	13	Hypoosmotic 1-20 20min 9EG7-488 primary Ab before fixation WT vs KO eLife 2022 SECOND.lif - Cav1WT MEF 9EG7-488 Hypo 13_serie_24_MAX-projection.tif:0509-0380	2160.26	52.512	478.279	0	255	2.43081	2.75767		13	Hypoosmotic 1-20 20min 9EG7-488 primary Ab before fixation WT vs KO eLife 2022 SECOND.lif - Cav1KO MEF 9EG7-488 Hypo 15_serie_15_MAX-projection.tif:0491-0561	2890.72	19.998	388.612	0	255	0.691799	0.847279
	14	Hypoosmotic 1-20 20min 9EG7-488 primary Ab before fixation WT vs KO eLife 2022 SECOND.lif - Cav1WT MEF 9EG7-488 Hypo 14_serie_25_MAX-projection.tif:0439-0543	2229.11	46.027	270.488	0	255	2.06482	2.34246		14	Hypoosmotic 1-20 20min 9EG7-488 primary Ab before fixation WT vs KO eLife 2022 SECOND.lif - Cav1KO MEF 9EG7-488 Hypo 16_serie_16_MAX-projection.tif:0543-0524	4961.36	42.954	450.647	0	255	0.865771	1.06035
	15	Hypoosmotic 1-20 20min 9EG7-488 primary Ab before fixation WT vs KO eLife 2022 SECOND.lif - Cav1WT MEF 9EG7-488 Hypo 15_serie_26_MAX-projection.tif:0443-0462	2945.7	21.346	383.192	0	255	0.724651	0.822091		15	Hypoosmotic 1-20 20min 9EG7-488 primary Ab before fixation WT vs KO eLife 2022 SECOND.lif - Cav1KO MEF 9EG7-488 Hypo 17_serie_17_MAX-projection.tif:0419-0442	735.542	105.087	202.649	0	255	14.287	17.498
	16	Hypoosmotic 1-20 20min 9EG7-488 primary Ab before fixation WT vs KO eLife 2022 SECOND.lif - Cav1WT MEF 9EG7-488 Hypo 16_serie_27_MAX-projection.tif:0515-0487	2234.52	29.061	286.753	0	255	1.30055	1.47542		16	Hypoosmotic 1-20 20min 9EG7-488 primary Ab before fixation WT vs KO eLife 2022 SECOND.lif - Cav1KO MEF 9EG7-488 Hypo 18_serie_18_MAX-projection.tif:0594-0391	1619.84	39.563	240.1	0	255	2.4424	2.99133
	17	Hypoosmotic 1-20 20min 9EG7-488 primary Ab before fixation WT vs KO eLife 2022 SECOND.lif - Cav1WT MEF 9EG7-488 Hypo 17_serie_28_MAX-projection.tif:0526-0520	3065.57	41.032	334.638	0	255	1.33848	1.51846		17	Hypoosmotic 1-20 20min 9EG7-488 primary Ab before fixation WT vs KO eLife 2022 SECOND.lif - Cav1KO MEF 9EG7-488 Hypo 19_serie_19_MAX-projection.tif:0532-0489	4073.6	32.494	595.684	0	255	0.797673	0.976948
	18	Hypoosmotic 1-20 20min 9EG7-488 primary Ab before fixation WT vs KO eLife 2022 SECOND.lif - Cav1WT MEF 9EG7-488 Hypo 18_serie_29_MAX-projection.tif:0480-0518	2810.03	41.721	308.065	0	255	1.48472	1.68436		18	Hypoosmotic 1-20 20min 9EG7-488 primary Ab before fixation WT vs KO eLife 2022 SECOND.lif - Cav1KO MEF 9EG7-488 Hypo 20_serie_20_MAX-projection.tif:0547-0489	3701.69	62.524	565.053	0	255	1.68907	2.06868
	19	Hypoosmotic 1-20 20min 9EG7-488 primary Ab before fixation WT vs KO eLife 2022 SECOND.lif - Cav1WT MEF 9EG7-488 Hypo 19_serie_30_MAX-projection.tif:0471-0528	3171.74	33.425	332.337	0	255	1.05384	1.19554		19	Hypoosmotic 1-20 20min 9EG7-488 primary Ab before fixation WT vs KO eLife 2022 SECOND.lif - Cav1KO MEF 9EG7-488 Hypo 21_serie_1_MAX-projection.tif:0501-0478	5354.43	35.019	628.299	0	255	0.654019	0.801008
	20	Hypoosmotic 1-20 20min 9EG7-488 primary Ab before fixation WT vs KO eLife 2022 SECOND.lif - Cav1WT MEF 9EG7-488 Hypo 20_serie_31_MAX-projection.tif:0540-0566	4017.89	48.993	465.135	0	255	1.21937	1.38333		20	Hypoosmotic 1-20 20min 9EG7-488 primary Ab before fixation WT vs KO eLife 2022 SECOND.lif - Cav1KO MEF 9EG7-488 Hypo 22_serie_12_MAX-projection.tif:0422-0475	2968.43	42.712	469.562	0	255	1.43888	1.76226
	21	Hypoosmotic 1-20 20min 9EG7-488 primary Ab before fixation WT vs KO eLife 2022 SECOND.lif - Cav1WT MEF 9EG7-488 Hypo 21_serie_32_MAX-projection.tif:0481-0563	5646.06	32.258	612.066	0	255	0.571336	0.648161		21	Hypoosmotic 1-20 20min 9EG7-488 primary Ab before fixation WT vs KO eLife 2022 SECOND.lif - Cav1KO MEF 9EG7-488 Hypo 23_serie_11_MAX-projection.tif:0355-0384	1431.09	35.619	207.586	0	255	2.48895	3.04833
	22	Hypoosmotic 1-20 20min 9EG7-488 primary Ab before fixation WT vs KO eLife 2022 SECOND.lif - Cav1WT MEF 9EG7-488 Hypo 22_serie_33_MAX-projection.tif:0530-0515	2771.93	46.424	496.479	0	255	1.67479	1.89999		22	Hypoosmotic 1-20 20min 9EG7-488 primary Ab before fixation WT vs KO eLife 2022 SECOND.lif - Cav1KO MEF 9EG7-488 Hypo 23_serie_11_MAX-projection.tif:0714-0189	424.468	97.093	119.228	0	255	22.874	28.0149
	23	Hypoosmotic 1-20 20min 9EG7-488 primary Ab before fixation WT vs KO eLife 2022 SECOND.lif - Cav1WT MEF 9EG7-488 Hypo 23_serie_34_MAX-projection.tif:0449-0635	814.203	83.564	235.909	0	255	10.2633	11.6433		23	Hypoosmotic 1-20 20min 9EG7-488 primary Ab before fixation WT vs KO eLife 2022 SECOND.lif - Cav1KO MEF 9EG7-488 Hypo 24_serie_10_MAX-projection.tif:0504-0712	2304.38	24.414	410.273	0	255	1.05946	1.29757
	24	Hypoosmotic 1-20 20min 9EG7-488 primary Ab before fixation WT vs KO eLife 2022 SECOND.lif - Cav1WT MEF 9EG7-488 Hypo 24_serie_35_MAX-projection.tif:0494-0525	2702.35	35.729	352.073	0	255	1.32215	1.49993		24	Hypoosmotic 1-20 20min 9EG7-488 primary Ab before fixation WT vs KO eLife 2022 SECOND.lif - Cav1KO MEF 9EG7-488 Hypo 24_serie_10_MAX-projection.tif:0435-0272	2504.39	26.773	371.404	0	255	1.06904	1.3093
	25	Hypoosmotic 1-20 20min 9EG7-488 primary Ab before fixation WT vs KO eLife 2022 SECOND.lif - Cav1WT MEF 9EG7-488 Hypo 25_serie_36_MAX-projection.tif:0447-0478	4617.48	31.571	524.255	0	255	0.683728	0.775666		25	Hypoosmotic 1-20 20min 9EG7-488 primary Ab before fixation WT vs KO eLife 2022 SECOND.lif - Cav1KO MEF 9EG7-488 Hypo 25_serie_9_MAX-projection.tif:0407-0511	3068.49	94.205	333.76	0	255	3.07008	3.76007
	26	Hypoosmotic 1-20 20min 9EG7-488 primary Ab before fixation WT vs KO eLife 2022 SECOND.lif - Cav1WT MEF 9EG7-488 Hypo 26_serie_22_MAX-projection.tif:0553-0512	1472.49	44.904	200.409	0	255	3.04953	3.45959		26	Hypoosmotic 1-20 20min 9EG7-488 primary Ab before fixation WT vs KO eLife 2022 SECOND.lif - Cav1KO MEF 9EG7-488 Hypo 26_serie_8_MAX-projection.tif:0475-0558	1066.44	63.477	434.803	0	255	5.95224	7.28999
	27	Hypoosmotic 1-20 20min 9EG7-488 primary Ab before fixation WT vs KO eLife 2022 SECOND.lif - Cav1WT MEF 9EG7-488 Hypo 27_serie_23_MAX-projection.tif:0533-0522	4096.86	31.834	408.374	0	255	0.777034	0.881519		27	Hypoosmotic 1-20 20min 9EG7-488 primary Ab before fixation WT vs KO eLife 2022 SECOND.lif - Cav1KO MEF 9EG7-488 Hypo 27_serie_7_MAX-projection.tif:0476-0552	1561.03	27.343	281.791	0	255	1.7516	2.14527
	28	Hypoosmotic 1-20 20min 9EG7-488 primary Ab before fixation WT vs KO eLife 2022 SECOND.lif - Cav1WT MEF 9EG7-488 Hypo 28_serie_24_MAX-projection.tif:0520-0486	2109.5	45.145	385.382	0	255	2.14008	2.42784		28	Hypoosmotic 1-20 20min 9EG7-488 primary Ab before fixation WT vs KO eLife 2022 SECOND.lif - Cav1KO MEF 9EG7-488 Hypo 28_serie_6_MAX-projection.tif:0493-0537	2712.58	33.512	494.627	0	255	1.23543	1.51309
	29	Hypoosmotic 1-20 20min 9EG7-488 primary Ab before fixation WT vs KO eLife 2022 SECOND.lif - Cav1WT MEF 9EG7-488 Hypo 29_serie_25_MAX-projection.tif:0459-0481	3793.38	48.979	476.663	0	255	1.29117	1.46479		29	Hypoosmotic 1-20 20min 9EG7-488 primary Ab before fixation WT vs KO eLife 2022 SECOND.lif - Cav1KO MEF 9EG7-488 Hypo 29_serie_5_MAX-projection.tif:0429-0616	1055.52	37.084	344.72	0	255	3.51335	4.30296
	30	Hypoosmotic 1-20 20min 9EG7-488 primary Ab before fixation WT vs KO eLife 2022 SECOND.lif - Cav1WT MEF 9EG7-488 Hypo 30_serie_21_MAX-projection.tif:0520-0611	1877.81	57.856	352.344	0	255	3.08103	3.49532		30	Hypoosmotic 1-20 20min 9EG7-488 primary Ab before fixation WT vs KO eLife 2022 SECOND.lif - Cav1KO MEF 9EG7-488 Hypo 30_serie_4_MAX-projection.tif:0493-0427	3900.58	29.216	627.481	0	255	0.749018	0.917357
											31	Hypoosmotic 1-20 20min 9EG7-488 primary Ab before fixation WT vs KO eLife 2022 SECOND.lif - Cav1KO MEF 9EG7-488 Hypo 31_serie_3_MAX-projection.tif:0425-0370	1990.49	27.343	319.235	0	255	1.37368	1.68241
											32	Hypoosmotic 1-20 20min 9EG7-488 primary Ab before fixation WT vs KO eLife 2022 SECOND.lif - Cav1KO MEF 9EG7-488 Hypo 31_serie_3_MAX-projection.tif:0576-0850	1668.82	24.194	257.03	0	255	1.44976	1.77559
											33	Hypoosmotic 1-20 20min 9EG7-488 primary Ab before fixation WT vs KO eLife 2022 SECOND.lif - Cav1KO MEF 9EG7-488 Hypo 32_serie_2_MAX-projection.tif:0450-0429	4067.05	34.416	453.27	0	255	0.846216	1.0364
			Average	44.6865				2.86443	3.24959				Average	40.6914				3.13228	3.83625
			SEM	3.9062				0.707817	0.802994				SEM	4.80093				0.843047	1.03252

## Sheet: 9EG7 siTln panel 6R
Image File	Image Serie	Channels Analyzed (ch1 vs. ch2)	Pearson coeff.	Normalized by Mean Control	M1	M2	ICQ	Ch1 threshold range	Ch2 threshold range
Cav1KO_shRNATln2_siTln1_9EG7_488_EEA1_647_.lif	Cav1KO_Control_9EG7_488_EEA1_647	Ch_Reference_actBCh_AND_Ch_DextranCh	0.453	1.04829	0.631	0.784	0.363	0; 0	0; 0\n
Cav1KO_shRNATln2_siTln1_9EG7_488_EEA1_647_.lif	Cav1KO_Control_9EG7_488_EEA1_647__2	Ch_Reference_actBCh_AND_Ch_DextranCh	0.31	0.717371	0.635	0.806	0.287	0; 0	0; 0\n			Cav1KO		Average	SEM
Cav1KO_shRNATln2_siTln1_9EG7_488_EEA1_647_.lif	Cav1KO_Control_9EG7_488_EEA1_647__3	Ch_Reference_actBCh_AND_Ch_DextranCh	0.411	0.951095	0.765	0.856	0.332	0; 0	0; 0\n				9EG7 vs EEA1 Control	0.432	0.019
Cav1KO_shRNATln2_siTln1_9EG7_488_EEA1_647_.lif	Cav1KO_Control_9EG7_488_EEA1_647__4	Ch_Reference_actBCh_AND_Ch_DextranCh	0.441	1.02052	0.633	0.808	0.354	0; 0	0; 0\n				9EG7 vs EEA1 shRNATln2+siRNATln1	0.542	0.017
Cav1KO_shRNATln2_siTln1_9EG7_488_EEA1_647_.lif	Cav1KO_Control_9EG7_488_EEA1_647__5	Ch_Reference_actBCh_AND_Ch_DextranCh	0.385	0.890929	0.86	0.903	0.279	0; 0	0; 0\n
Cav1KO_shRNATln2_siTln1_9EG7_488_EEA1_647_.lif	Cav1KO_Control_9EG7_488_EEA1_647__6	Ch_Reference_actBCh_AND_Ch_DextranCh	0.431	0.997377	0.797	0.892	0.314	0; 0	0; 0\n
Cav1KO_shRNATln2_siTln1_9EG7_488_EEA1_647_.lif	Cav1KO_Control_9EG7_488_EEA1_647__7	Ch_Reference_actBCh_AND_Ch_DextranCh	0.479	1.10845	0.826	0.896	0.337	0; 0	0; 0\n
Cav1KO_shRNATln2_siTln1_9EG7_488_EEA1_647_.lif	Cav1KO_Control_9EG7_488_EEA1_647__8	Ch_Reference_actBCh_AND_Ch_DextranCh	0.48	1.11077	0.783	0.885	0.335	0; 0	0; 0\n
Cav1KO_shRNATln2_siTln1_9EG7_488_EEA1_647_.lif	Cav1KO_Control_9EG7_488_EEA1_647__9	Ch_Reference_actBCh_AND_Ch_DextranCh	0.389	0.900185	0.866	0.92	0.313	0; 0	0; 0\n
Cav1KO_shRNATln2_siTln1_9EG7_488_EEA1_647_.lif	Cav1KO_Control_9EG7_488_EEA1_647__10	Ch_Reference_actBCh_AND_Ch_DextranCh	0.524	1.21259	0.837	0.891	0.366	0; 0	0; 0\n
Cav1KO_shRNATln2_siTln1_9EG7_488_EEA1_647_.lif	Cav1KO_Control_9EG7_488_EEA1_647__11	Ch_Reference_actBCh_AND_Ch_DextranCh	0.527	1.21953	0.802	0.882	0.384	0; 0	0; 0\n
Cav1KO_shRNATln2_siTln1_9EG7_488_EEA1_647_.lif	Cav1KO_Control_9EG7_488_EEA1_647__12	Ch_Reference_actBCh_AND_Ch_DextranCh	0.409	0.946467	0.831	0.887	0.321	0; 0	0; 0\n
Cav1KO_shRNATln2_siTln1_9EG7_488_EEA1_647_.lif	Cav1KO_Control_9EG7_488_EEA1_647__13	Ch_Reference_actBCh_AND_Ch_DextranCh	0.271	0.627121	0.764	0.859	0.315	0; 0	0; 0\n
Cav1KO_shRNATln2_siTln1_9EG7_488_EEA1_647_.lif	Cav1KO_Control_9EG7_488_EEA1_647__14	Ch_Reference_actBCh_AND_Ch_DextranCh	0.438	1.01358	0.863	0.894	0.312	0; 0	0; 0\n
Cav1KO_shRNATln2_siTln1_9EG7_488_EEA1_647_.lif	Cav1KO_Control_9EG7_488_EEA1_647__15	Ch_Reference_actBCh_AND_Ch_DextranCh	0.534	1.23573	0.772	0.911	0.41	0; 0	0; 0\n
		Average	0.432133	1
		SEM		0.0448259
Cav1KO_shRNATln2_siTln1_9EG7_488_EEA1_647_.lif	Cav1KO+shRNATln2+siRNATln1_9EG7_488_EEA1_647	Ch_Reference_actBCh_AND_Ch_DextranCh	0.378	0.87473	0.716	0.834	0.403	0; 0	0; 0\n
Cav1KO_shRNATln2_siTln1_9EG7_488_EEA1_647_.lif	Cav1KO+shRNATln2+siRNATln1_9EG7_488_EEA1_647_2	Ch_Reference_actBCh_AND_Ch_DextranCh	0.557	1.28895	0.75	0.867	0.427	0; 0	0; 0\n
Cav1KO_shRNATln2_siTln1_9EG7_488_EEA1_647_.lif	Cav1KO+shRNATln2+siRNATln1_9EG7_488_EEA1_647_3	Ch_Reference_actBCh_AND_Ch_DextranCh	0.561	1.29821	0.751	0.848	0.443	0; 0	0; 0\n
Cav1KO_shRNATln2_siTln1_9EG7_488_EEA1_647_.lif	Cav1KO+shRNATln2+siRNATln1_9EG7_488_EEA1_647__4	Ch_Reference_actBCh_AND_Ch_DextranCh	0.579	1.33986	0.813	0.907	0.411	0; 0	0; 0\n
Cav1KO_shRNATln2_siTln1_9EG7_488_EEA1_647_.lif	Cav1KO+shRNATln2+siRNATln1_9EG7_488_EEA1_647_5	Ch_Reference_actBCh_AND_Ch_DextranCh	0.544	1.25887	0.84	0.909	0.41	0; 0	0; 0\n
Cav1KO_shRNATln2_siTln1_9EG7_488_EEA1_647_.lif	Cav1KO+shRNATln2+siRNATln1_9EG7_488_EEA1_647_6	Ch_Reference_actBCh_AND_Ch_DextranCh	0.51	1.18019	0.84	0.903	0.385	0; 0	0; 0\n
Cav1KO_shRNATln2_siTln1_9EG7_488_EEA1_647_.lif	Cav1KO+shRNATln2+siRNATln1_9EG7_488_EEA1_647_7	Ch_Reference_actBCh_AND_Ch_DextranCh	0.592	1.36995	0.829	0.896	0.42	0; 0	0; 0\n
Cav1KO_shRNATln2_siTln1_9EG7_488_EEA1_647_.lif	Cav1KO+shRNATln2+siRNATln1_9EG7_488_EEA1_647_8	Ch_Reference_actBCh_AND_Ch_DextranCh	0.548	1.26813	0.809	0.871	0.421	0; 0	0; 0\n
Cav1KO_shRNATln2_siTln1_9EG7_488_EEA1_647_.lif	Cav1KO+shRNATln2+siRNATln1_9EG7_488_EEA1_647_9	Ch_Reference_actBCh_AND_Ch_DextranCh	0.556	1.28664	0.826	0.861	0.431	0; 0	0; 0\n
Cav1KO_shRNATln2_siTln1_9EG7_488_EEA1_647_.lif	Cav1KO+shRNATln2+siRNATln1_9EG7_488_EEA1_647_10	Ch_Reference_actBCh_AND_Ch_DextranCh	0.491	1.13622	0.876	0.927	0.367	0; 0	0; 0\n
Cav1KO_shRNATln2_siTln1_9EG7_488_EEA1_647_.lif	Cav1KO+shRNATln2+siRNATln1_9EG7_488_EEA1_647_11	Ch_Reference_actBCh_AND_Ch_DextranCh	0.434	1.00432	0.884	0.924	0.344	0; 0	0; 0\n
Cav1KO_shRNATln2_siTln1_9EG7_488_EEA1_647_.lif	Cav1KO+shRNATln2+siRNATln1_9EG7_488_EEA1_647_12	Ch_Reference_actBCh_AND_Ch_DextranCh	0.621	1.43706	0.798	0.909	0.42	0; 0	0; 0\n
Cav1KO_shRNATln2_siTln1_9EG7_488_EEA1_647_.lif	Cav1KO+shRNATln2+siRNATln1_9EG7_488_EEA1_647_13	Ch_Reference_actBCh_AND_Ch_DextranCh	0.607	1.40466	0.823	0.912	0.418	0; 0	0; 0\n
Cav1KO_shRNATln2_siTln1_9EG7_488_EEA1_647_.lif	Cav1KO+shRNATln2+siRNATln1_9EG7_488_EEA1_647_14	Ch_Reference_actBCh_AND_Ch_DextranCh	0.542	1.25424	0.753	0.862	0.447	0; 0	0; 0\n
Cav1KO_shRNATln2_siTln1_9EG7_488_EEA1_647_.lif	Cav1KO+shRNATln2+siRNATln1_9EG7_488_EEA1_647_15	Ch_Reference_actBCh_AND_Ch_DextranCh	0.603	1.3954	0.823	0.913	0.429	0; 0	0; 0\n
		Average	0.541533	1.25316
		SEM		0.0394594

## Sheet: 9EG7 siTln panel 6U
Image File	Image Serie	Channels Analyzed (ch1 vs. ch2)	Pearson coeff.	Normalized by Mean Control	M1	M2	ICQ	Ch1 threshold range	Ch2 threshold range
Cav1KO_shRNATln2_siTln1_AcBeta1_488_EEA1_647_FINAL_.lif	Cav1KO_Control_AcBeta1_488_EEA1_647	Ch_Reference_actBCh_AND_Ch_DextranCh	0.044	0.254021	0.406	0.686	0.234	0; 0	0; 0\n			Cav1KO		Average	SEM
Cav1KO_shRNATln2_siTln1_AcBeta1_488_EEA1_647_FINAL_.lif	Cav1KO_Control_AcBeta1_488_EEA1_647_2	Ch_Reference_actBCh_AND_Ch_DextranCh	0.298	1.72041	0.428	0.747	0.292	0; 0	0; 0\n				ActB1 vs EEA1 Control	0.173214	0.0255748
Cav1KO_shRNATln2_siTln1_AcBeta1_488_EEA1_647_FINAL_.lif	Cav1KO_Control_AcBeta1_488_EEA1_647__3	Ch_Reference_actBCh_AND_Ch_DextranCh	0.078	0.450309	0.349	0.735	0.236	0; 0	0; 0\n				ActB1 vs EEA1 shRNATln2+siRNATln1	0.2565	0.0364308
Cav1KO_shRNATln2_siTln1_AcBeta1_488_EEA1_647_FINAL_.lif	Cav1KO_Control_AcBeta1_488_EEA1_647_4	Ch_Reference_actBCh_AND_Ch_DextranCh	0.051	0.294433	0.409	0.706	0.222	0; 0	0; 0\n
Cav1KO_shRNATln2_siTln1_AcBeta1_488_EEA1_647_FINAL_.lif	Cav1KO_Control_AcBeta1_488_EEA1_647_5	Ch_Reference_actBCh_AND_Ch_DextranCh	0.246	1.42021	0.399	0.755	0.275	0; 0	0; 0\n
Cav1KO_shRNATln2_siTln1_AcBeta1_488_EEA1_647_FINAL_.lif	Cav1KO_Control_AcBeta1_488_EEA1_647_6	Ch_Reference_actBCh_AND_Ch_DextranCh	0.161	0.929485	0.365	0.741	0.255	0; 0	0; 0\n
Cav1KO_shRNATln2_siTln1_AcBeta1_488_EEA1_647_FINAL_.lif	Cav1KO_Control_AcBeta1_488_EEA1_647_7	Ch_Reference_actBCh_AND_Ch_DextranCh	0.141	0.814021	0.361	0.731	0.27	0; 0	0; 0\n
Cav1KO_shRNATln2_siTln1_AcBeta1_488_EEA1_647_FINAL_.lif	Cav1KO_Control_AcBeta1_488_EEA1_647_8	Ch_Reference_actBCh_AND_Ch_DextranCh	0.259	1.49526	0.57	0.849	0.159	0; 0	0; 0\n
Cav1KO_shRNATln2_siTln1_AcBeta1_488_EEA1_647_FINAL_.lif	Cav1KO_Control_AcBeta1_488_EEA1_647_9	Ch_Reference_actBCh_AND_Ch_DextranCh	0.268	1.54722	0.606	0.749	0.229	0; 0	0; 0\n
Cav1KO_shRNATln2_siTln1_AcBeta1_488_EEA1_647_FINAL_.lif	Cav1KO_Control_AcBeta1_488_EEA1_647_10	Ch_Reference_actBCh_AND_Ch_DextranCh	0.368		0.588	0.825	0.181	0; 0	0; 0\n
Cav1KO_shRNATln2_siTln1_AcBeta1_488_EEA1_647_FINAL_.lif	Cav1KO_Control_AcBeta1_488_EEA1_647_11	Ch_Reference_actBCh_AND_Ch_DextranCh	0.184	1.06227	0.431	0.78	0.256	0; 0	0; 0\n
Cav1KO_shRNATln2_siTln1_AcBeta1_488_EEA1_647_FINAL_.lif	Cav1KO_Control_AcBeta1_488_EEA1_647_12	Ch_Reference_actBCh_AND_Ch_DextranCh	0.165	0.952577	0.417	0.793	0.218	0; 0	0; 0\n
Cav1KO_shRNATln2_siTln1_AcBeta1_488_EEA1_647_FINAL_.lif	Cav1KO_Control_AcBeta1_488_EEA1_647_13	Ch_Reference_actBCh_AND_Ch_DextranCh	0.134	0.773608	0.378	0.741	0.258	0; 0	0; 0\n
Cav1KO_shRNATln2_siTln1_AcBeta1_488_EEA1_647_FINAL_.lif	Cav1KO_Control_AcBeta1_488_EEA1_647_14	Ch_Reference_actBCh_AND_Ch_DextranCh	0.062	0.357938	0.365	0.728	0.253	0; 0	0; 0\n
Cav1KO_shRNATln2_siTln1_AcBeta1_488_EEA1_647_FINAL_.lif	Cav1KO_Control_AcBeta1_488_EEA1_647_15	Ch_Reference_actBCh_AND_Ch_DextranCh	0.334	1.92825	0.463	0.791	0.212	0; 0	0; 0\n
		Average	0.173214	1
		SEM		0.147648
Cav1KO_shRNATln2_siTln1_AcBeta1_488_EEA1_647_FINAL_.lif	Cav1KO_shRNATln2_siTln1_AcBeta1_488_EEA1_647	Ch_Reference_actBCh_AND_Ch_DextranCh	0.159	0.917938	0.362	0.778	0.261	0; 0	0; 0\n
Cav1KO_shRNATln2_siTln1_AcBeta1_488_EEA1_647_FINAL_.lif	Cav1KO_shRNATln2_siTln1_AcBeta1_488_EEA1_6472	Ch_Reference_actBCh_AND_Ch_DextranCh	0.22	1.2701	0.368	0.81	0.267	0; 0	0; 0\n
Cav1KO_shRNATln2_siTln1_AcBeta1_488_EEA1_647_FINAL_.lif	Cav1KO_shRNATln2_siTln1_AcBeta1_488_EEA1_647_3	Ch_Reference_actBCh_AND_Ch_DextranCh	0.438	2.52866	0.481	0.694	0.268	0; 0	0; 0\n
Cav1KO_shRNATln2_siTln1_AcBeta1_488_EEA1_647_FINAL_.lif	Cav1KO_shRNATln2_siTln1_AcBeta1_488_EEA1_647_4	Ch_Reference_actBCh_AND_Ch_DextranCh	0.053	0.305979	0.365	0.607	0.286	0; 0	0; 0\n
Cav1KO_shRNATln2_siTln1_AcBeta1_488_EEA1_647_FINAL_.lif	Cav1KO_shRNATln2_siTln1_AcBeta1_488_EEA1_647_5	Ch_Reference_actBCh_AND_Ch_DextranCh	0.276	1.5934	0.476	0.637	0.271	0; 0	0; 0\n
Cav1KO_shRNATln2_siTln1_AcBeta1_488_EEA1_647_FINAL_.lif	Cav1KO_shRNATln2_siTln1_AcBeta1_488_EEA1_647_6	Ch_Reference_actBCh_AND_Ch_DextranCh	0.119	0.68701	0.326	0.678	0.313	0; 0	0; 0\n
Cav1KO_shRNATln2_siTln1_AcBeta1_488_EEA1_647_FINAL_.lif	Cav1KO_shRNATln2_siTln1_AcBeta1_488_EEA1_647_7	Ch_Reference_actBCh_AND_Ch_DextranCh	0.419	2.41897	0.582	0.739	0.267	0; 0	0; 0\n
Cav1KO_shRNATln2_siTln1_AcBeta1_488_EEA1_647_FINAL_.lif	Cav1KO_shRNATln2_siTln1_AcBeta1_488_EEA1_647_8	Ch_Reference_actBCh_AND_Ch_DextranCh	0.298	1.72041	0.539	0.713	0.259	0; 0	0; 0\n
Cav1KO_shRNATln2_siTln1_AcBeta1_488_EEA1_647_FINAL_.lif	Cav1KO_shRNATln2_siTln1_AcBeta1_488_EEA1_647_9	Ch_Reference_actBCh_AND_Ch_DextranCh	0.198	1.14309	0.446	0.764	0.287	0; 0	0; 0\n
Cav1KO_shRNATln2_siTln1_AcBeta1_488_EEA1_647_FINAL_.lif	Cav1KO_shRNATln2_siTln1_AcBeta1_488_EEA1_647_10	Ch_Reference_actBCh_AND_Ch_DextranCh	0.232	1.33938	0.447	0.739	0.305	0; 0	0; 0\n
Cav1KO_shRNATln2_siTln1_AcBeta1_488_EEA1_647_FINAL_.lif	Cav1KO_shRNATln2_siTln1_AcBeta1_488_EEA1_647_11	Ch_Reference_actBCh_AND_Ch_DextranCh	0.168	0.969897	0.419	0.725	0.3	0; 0	0; 0\n
Cav1KO_shRNATln2_siTln1_AcBeta1_488_EEA1_647_FINAL_.lif	Cav1KO_shRNATln2_siTln1_AcBeta1_488_EEA1_647_12	Ch_Reference_actBCh_AND_Ch_DextranCh	0.26	1.50103	0.582	0.809	0.278	0; 0	0; 0\n
Cav1KO_shRNATln2_siTln1_AcBeta1_488_EEA1_647_FINAL_.lif	Cav1KO_shRNATln2_siTln1_AcBeta1_488_EEA1_647_13	Ch_Reference_actBCh_AND_Ch_DextranCh	0.411	2.37278	0.646	0.81	0.247	0; 0	0; 0\n
Cav1KO_shRNATln2_siTln1_AcBeta1_488_EEA1_647_FINAL_.lif	Cav1KO_shRNATln2_siTln1_AcBeta1_488_EEA1_647_14	Ch_Reference_actBCh_AND_Ch_DextranCh	0.189	1.09113	0.413	0.849	0.189	0; 0	0; 0\n
Cav1KO_shRNATln2_siTln1_AcBeta1_488_EEA1_647_FINAL_.lif	Cav1KO_shRNATln2_siTln1_AcBeta1_488_EEA1_647_15	Ch_Reference_actBCh_AND_Ch_DextranCh	0.079		0.244	0.766	0.361	0; 0	0; 0\n
Cav1KO_shRNATln2_siTln1_AcBeta1_488_EEA1_647_FINAL_.lif	Cav1KO_shRNATln2_siTln1_AcBeta1_488_EEA1_647_16	Ch_Reference_actBCh_AND_Ch_DextranCh	0.585	3.37732	0.795	0.895	0.373	0; 0	0; 0\n
		Average	0.2565	1.54914
		SEM		0.210322

## Sheet: 9EG7 siTln panel 6V
100.000 KO+shRNATln2 (PuroR) plated on p6 normal plate were transfected with siRNATln1 (3.5ul) for 48h together with Cav1KO and withouth replating total surface active Beta1 integrin was analyzed
1º.- READ	FIDEL	This time we used KO instead of KO+shRNA TLn2 as control
	KO+siRNA Control FIRST	KO+siRNA Control SECOND	KO+siRNA Control THIRD	KOshRNATln2+siRNATln1 FIRST	KOshRNATln2+siRNATln1 SECOND	KOshRNATln2+siRNATln1 THIRD
Beta 1 9EG7	0.72	0.736	0.71	0.67	0.499	0.572
2º.- READ	FIDEL
	KO+siRNA Control FIRST	KO+siRNA Control SECOND	KO+siRNA Control THIRD	KOshRNATln2+siRNATln1 0min	KOshRNATln2+siRNATln1 1min	KOshRNATln2+siRNATln1 3min
Beta 1 9EG7	0.718	0.733	0.706	0.667	0.497	0.573
3º.- READ	FIDEL
	KO+siRNA Control FIRST	KO+siRNA Control SECOND	KO+siRNA Control THIRD	KOshRNATln2+siRNATln1 0min	KOshRNATln2+siRNATln1 1min	KOshRNATln2+siRNATln1 3min
Beta 1 9EG7	0.718	0.733	0.71	0.665	0.499	0.575
	0.718667	0.734	0.708667	0.667333	0.498333	0.573333
	0.720444
	0.997532	1.01882	0.983652	0.92628	0.691703	0.795805
	0.362	0.383333	0.428667	0.297667	0.377667	0.403333
	0.391333
	0.925043	0.979557	1.0954	0.760647	0.965077	1.03066
	0.769667	0.759667	0.712667	0.732667	0.672667	0.657333
	0.747333
	1.02988	1.0165	0.953613	0.980375	0.900089	0.879572
	0.648667	0.634667	0.618667	0.583667	0.571	0.528
	0.634
	1.02313	1.00105	0.975815	0.92061	0.900631	0.832808
	0.663333	0.703333	0.51	0.678333	0.649	0.101
	0.625556
	1.06039	1.12433	0.815275	1.08437	1.03748	0.161456
	1	0.0186997
	0.857838	0.0568688
