# Supplementary material for: Caveolae couple mechanical stress to integrin recycling and activation
Source: eLife. 2022 Oct 20;11:e82348. doi: 10.7554/eLife.82348 (PMC9747151; doi:10.7554/eLife.82348)
Supplement: Figure 7—source data 1. [file elife-82348-fig7-data1.xlsx]

## Sheet: Adhesion exps. Figure 7M
48h after transfection with esiRNATln1	Adhesion Summary with esiRNA
2018-01-06
Adhesion Average Normalized by WT	WT	KO	KO+shRNA Talin2	KO+shRNA Talin2 +esiRNA Talin1
	1	1.9668	2.10373	1.50622
	1	2.25959	2.49436	2.00677
2018-02-07
Adhesion Average Normalized by WT	WT	KO	KO+shRNA Talin2	KO+shRNA Talin2 +esiRNA Talin1
First Plate
	1	1.22931	2.7181	1.02069
	1	1.24927	2.71893	0.904605
Second Plate	1	0.773585	2.2035	0.574124
	1	1.10927	2.24007	1.10265
2018-05-07
Adhesion Average Normalized by WT	WT	KO	KO+shRNA Talin2	KO+shRNA Talin2 +esiRNA Talin1
	1	1.43299	1.34227	1.4
	1	1.71827	0.69797	1.1066
	1	1.54701	0.468376	1.0547
2018-07-06
Adhesion Average Normalized by WT	WT	KO	KO+shRNA Talin2	KO+shRNA Talin2 +esiRNA Talin1
	1	2.31638	2.0678	0.830508
	1	1.96181	1.71181	0.295139
	1	1.71676	1.29191	1.51156
	1	1.17695	1.25926	0.683128
14/6/2018
Adhesion Average Normalized by WT	WT	KO	KO+shRNA Talin2	KO+shRNA Talin2 +esiRNA Talin1
	1	1.34247	1.21553	0.951598
	1	1.23792	1.00682	0.846964
	1	1.36603	1.33397	0.952564
	1	1.29014	1.09352	0.699155
	1	1.30556	1.68222	1.22333
	Cav1WT	Cav1KO	Cav1KO+shRNATln2	Cav1KO+shRNATln2 +esiRNATln1
Average Total	1	1.50001	1.64723	1.03724
SEM	0	0.0971845	0.1589	0.0935281

## Sheet: Adhesion exps. Figure 7P
		48h after transfection with siRNATln1 New
	From 30-7-2018 48h
	WT	KO	KO+2+1	KO+2+1+WT	KO+2+1+Mut
	1	1.06014		1.26884	1.05761
	1	1.34753		1.72198
	1		0.887373	1.18958	1.05247
	1	1.07993		0.868508	0.861878
	1		0.729696	1.00502	0.823142
	1	1.067		1.78727	1.16136
	1			1.2045	0.955703
	1	1.03752	0.955302	1.08972	0.81044
	1	1.0765		1.17252	0.962529
	1	1.01698		1.10041	0.904393
	1	1.1219		1.32061	1.05152
	1		1.03418		0.955069
	From 2-8-2018 24h
	WT	KO	KO+2+1	KO+2+1+WT	KO+2+1+Mut
	1	2.04595	1.55405	1.91622	1.52973
	1	1.50101	1.41608	1.26946	0.846815
	1	1.24898	1.05494
	1	1.78311	1.43124
	1	1.09105	0.866001
	From 6-8-2018 24h
	WT	KO	KO+2+1	KO+2+1+WT	KO+2+1+Mut
	1	1.41718	1.41409	1.73115	1.7398
	1	1.96959	1.79066	2.40523	2.11174
	1	1.64126	1.30597	1.6855	1.65032
	1	1.82391	1.95705	2.41661	2.05655
	1	1.31074	0.811895	0.841863	0.737206
	1	1.25626	0.76185	0.811175	0.654335
	1	1.28631	0.991184	1.00714	0.789673
	1	1.3073	1.07137	1.37154	0.944165
	1	1.21495	1.08984	1.40092	1.07767
	From 11-9-2018 24h siRNA + 48h TalinH (with sorting at 24h)
	WT	KO	KO+2+1	KO+2+1+WT	KO+2+1+Mut
	1		0.672379		0.577264
	1	0.935168	0.842821	0.699557	0.680582
	1	1.12211		1.16121	0.865599
	1	1.13709	0.959634	1.14623
	1	1.05464		0.708832
	1	1.1746	0.973775
	1	1.02581	0.965485
	1	1.06229	0.827638
	1		0.715193
	1		0.623686
	From 15-9-2018 24h siRNA + 48h TalinH (with sorting at 24h)
	WT	KO	KO+2+1	KO+2+1+WT	KO+2+1+Mut
	1	1.57526	1.03961	1.09431	1.10911
	1	1.26007	1.05254	1.33553	1.37349
	1	1.18839	1.09107	1.62866	1.27195
	1	1.18994	1.17373	1.24335	1.03517
	1	1.1984	1.12644
	Cav1WT	Cav1KO	Cav1KO+shRNATln2+siRNATln1	Cav1KO+shRNATln2+siRNATln1+TH WT	Cav1KO+shRNATln2+siRNATln1+TH Mut
	1	1.2832	1.07054	1.32011	1.09129
	0	0.0484497	0.0566065	0.0790803	0.0726674

## Sheet: Adhesion exps. Figure 7S
HELA Cells
	(6h serum starvation; exp 30-32 after transfection
	mean	SD	sem	Normalized to Control
Control	0.4105	0.0413718	0.018502	1
Cav1KD	0.5182	0.0543295	0.0242969	1.26236
Cav1KD+siRNATln1	0.4172	0.0695536	0.0311053	1.01632
